# Supplementary material for: Statistical analysis of PN clusters in Mo/VFe protein crystals using a bond valence method toward their electronic structures
Source: Royal Society of Chemistry journal article supplement (doi:10.1039/d1ra08507g), 2022-01-01
Supplement: d1ra08507g1.pdf [file d1ra08507g1.pdf]

## Supporting information

### Statistical analysis of $P^N$ clusters in Mo/VFe protein crystals using a bond valence method toward their electronic structures

Chang Yuan, Wan-Ting Jin and Zhao-Hui Zhou\*

State Key Laboratory for Physical Chemistry of Solid Surfaces, College of Chemistry and Chemical Engineering, Xiamen University, Xiamen 361005, P. R. China.

Email: zhzhou@xmu.edu.cn

#### Table Options

|                                                                                                                                                                                                 |         |
|-------------------------------------------------------------------------------------------------------------------------------------------------------------------------------------------------|---------|
| <b>Figure S1</b> The curves of $w_i$ by adopting different $P$ in P-clusters of MoFe proteins along with different resolutions. ....                                                            | 2       |
| <b>Table S1</b> The deviation values of $P^N$ clusters from adopted PDB entries. ....                                                                                                           | 3       |
| <b>Table S2</b> The deviation values of $P^N$ clusters from abandoned PDB entries, and classifications of different $P^{1+}$ , $P^{2+}$ and mixed state P-clusters of special PDB entries. .... | 4       |
| <b>Table S3</b> The abandoned valences of iron atoms in $P^N$ clusters which contain unreasonable structures and faulty data. ....                                                              | 5-6     |
| <b>Table S4–S9</b> The abandoned bond valence analyses for irons in P-clusters from MoFe proteins 1MIO, 3K1A and 6O7S. ....                                                                     | 7-19    |
| <b>Table S10–S25</b> The abandoned valence analyses for irons in P-clusters from MoFe proteins 1M1Y, 2AFI, 6BBL, 6OP1, 6OP2 and 6OP4. ....                                                      | 20-51   |
| <b>Table S26–S92</b> The adopted bond valence analyses for irons in $P^N$ clusters from MoFe proteins (PDB entries: 1H1L to 7JRF).....                                                          | 52-185  |
| <b>Table S93–S102</b> The adopted bond valence analyses for irons in $P^N$ clusters from VFe proteins (PDB entries: 5N6Y, 6FEA, 7ADR, 7ADY and 7AIZ).....                                       | 186-205 |
| <b>Table S103–S116</b> The bond valence analyses of irons in 14 $P^N$ model compounds. ....                                                                                                     | 206-233 |
| <b>References</b> .....                                                                                                                                                                         | 234     |

**Figure S1** The curves of  $w_i$  by adopting different  $P$  in P-clusters of MoFe proteins along with different resolutions.

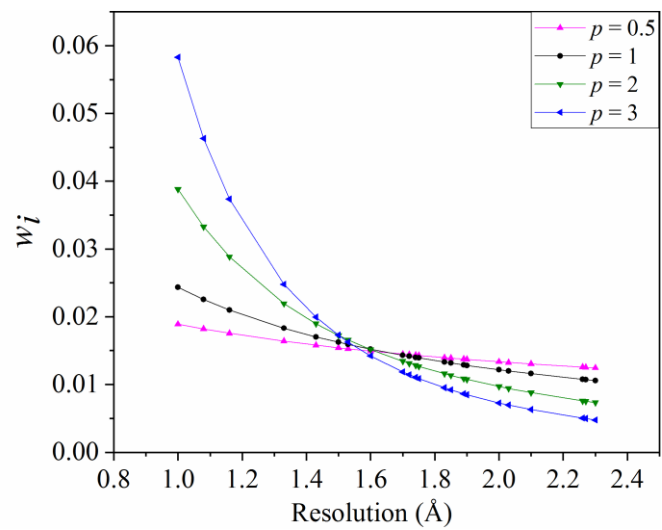



**Table S2** The averaged  $d$  ( $d=S_i - n$ ,  $n= +2$  and  $+3$ ) of  $P^N$  clusters in **abandoned** PDB entries by using  $R_0 (+2)$  and  $R_0 (+3)$ , and the reasons that they were not taken into BVS analysis are listed below. Blank items on account of that the corresponding values are improper to present. Special illustration of PDB entries that perform as  $P^{1+}$ ,  $P^{2+}$ , and mixed state  $P^{N/1+}$ ,  $P^{1+/2+}$  and  $P^{N/2+}$  are classified too.

| PDB codes                                                                                                                      | Number of P-clusters | Res (Å) | Averaged $d$ by using $R_0 (+2)$ |       |       |       |       |        |       |       |       | Averaged $d$ by using $R_0 (+3)$ |        |        |        |        |        |        |        |        |
|--------------------------------------------------------------------------------------------------------------------------------|----------------------|---------|----------------------------------|-------|-------|-------|-------|--------|-------|-------|-------|----------------------------------|--------|--------|--------|--------|--------|--------|--------|--------|
|                                                                                                                                |                      |         | Fe1                              | Fe2   | Fe3   | Fe4   | Fe5   | Fe6    | Fe7   | Fe8   | 8Fe   | Fe1                              | Fe2    | Fe3    | Fe4    | Fe5    | Fe6    | Fe7    | Fe8    | 8Fe    |
| <b>Abandoned <math>P^N</math> in MoFe proteins :</b>                                                                           |                      |         |                                  |       |       |       |       |        |       |       |       |                                  |        |        |        |        |        |        |        |        |
| P <sup>N</sup> clusters of wrong [Fe <sub>8</sub> S <sub>8</sub> ] structures                                                  |                      |         |                                  |       |       |       |       |        |       |       |       |                                  |        |        |        |        |        |        |        |        |
| 1MIO                                                                                                                           | 2                    | 3.00    | 0.491                            | 0.547 | 0.408 | 0.418 | 0.367 | 0.732  | 0.289 | 0.426 |       | -0.306                           | -0.246 | -0.396 | -0.385 | -0.440 | -0.042 | -0.525 | -0.376 |        |
| P <sup>N</sup> clusters without valid Fe3 and Fe7-S <sub>cys</sub> bonds                                                       |                      |         |                                  |       |       |       |       |        |       |       |       |                                  |        |        |        |        |        |        |        |        |
| 3K1A                                                                                                                           | 2                    | 2.23    | 0.273                            | 1.558 |       | 1.306 | 1.139 | 0.705  |       | 1.626 |       | -0.543                           | 0.848  |        | 0.575  | 0.395  | -0.075 |        | 0.921  |        |
| P <sup>N</sup> clusters without Fe1 and Fe5 substituted by Na atom                                                             |                      |         |                                  |       |       |       |       |        |       |       |       |                                  |        |        |        |        |        |        |        |        |
| 6O7S                                                                                                                           | 2                    | 2.27    |                                  | 0.310 | 0.580 | 0.389 |       | -0.079 | 0.334 | 0.466 |       |                                  | -0.502 | -0.210 | -0.417 |        | -0.923 | -0.477 | -0.333 |        |
| P <sup>N</sup> clusters which have overlarge calculated bond valences due to its resolutions beyond 2.3 Å                      |                      |         |                                  |       |       |       |       |        |       |       |       |                                  |        |        |        |        |        |        |        |        |
| 1M1Y                                                                                                                           | 4                    | 3.20    | 0.833                            | 0.430 | 1.088 | 2.367 | 1.674 | 0.323  | 0.097 | 1.231 | 8.042 | 0.064                            | -0.372 | 0.340  | 1.723  | 0.973  | -0.487 | -0.732 | 0.494  | 2.003  |
| 2AFI                                                                                                                           | 4                    | 3.10    | 1.153                            | 0.360 | 0.974 | 1.488 | 1.188 | 0.443  | 0.807 | 1.320 | 7.733 | 0.410                            | -0.448 | 0.217  | 0.772  | 0.448  | -0.357 | 0.036  | 0.591  | 1.669  |
| P <sup>N</sup> clusters which have too short Fe-S bond lead to weird bond valences in several Fe atoms                         |                      |         |                                  |       |       |       |       |        |       |       |       |                                  |        |        |        |        |        |        |        |        |
| 6BBL                                                                                                                           | 2                    | 1.68    | 0.709                            | 0.658 | 0.929 | 0.704 | 0.619 | 0.350  | 0.772 | 0.652 | 5.394 | -0.070                           | -0.126 | 0.168  | -0.076 | -0.168 | -0.458 | -0.002 | -0.131 | -0.862 |
| 6OP1                                                                                                                           | 2                    | 1.70    | 1.018                            | 0.726 | 1.068 | 0.992 | 0.224 | 0.093  | 0.198 | 0.292 | 4.612 | 0.264                            | -0.051 | 0.318  | 0.236  | -0.595 | -0.736 | -0.622 | -0.521 | -1.707 |
| 6OP2                                                                                                                           | 2                    | 1.90    | 1.507                            | 1.060 | 1.734 | 1.614 | 0.285 | -0.055 | 0.182 | 0.286 | 6.612 | 0.793                            | 0.310  | 1.039  | 0.909  | -0.529 | -0.897 | -0.641 | -0.528 | 0.455  |
| 6OP4                                                                                                                           | 2                    | 2.30    | 3.545                            | 1.338 | 1.879 | 1.852 | 0.366 | -0.033 | 0.288 | 0.557 | 9.793 | 2.997                            | 0.611  | 1.195  | 1.166  | -0.441 | -0.872 | -0.525 | -0.234 | 3.896  |
| <b>other special P-clusters in MoFe proteins :</b>                                                                             |                      |         |                                  |       |       |       |       |        |       |       |       |                                  |        |        |        |        |        |        |        |        |
| Unclear P <sup>N/1+</sup> ( regarded as P <sup>N</sup> or adopted the part of P <sup>N</sup> ): 1M34、5CX1、5VQ4、6BBL(abandoned) |                      |         |                                  |       |       |       |       |        |       |       |       |                                  |        |        |        |        |        |        |        |        |
| Unclear P <sup>1+/2+</sup> : 1N2C、1FP4                                                                                         |                      |         |                                  |       |       |       |       |        |       |       |       |                                  |        |        |        |        |        |        |        |        |
| P <sup>N/2+</sup> superposition: 1QH8、3U7Q、4WES、4WNA                                                                           |                      |         |                                  |       |       |       |       |        |       |       |       |                                  |        |        |        |        |        |        |        |        |
| Unclear P <sup>1+</sup> : 6CDK                                                                                                 |                      |         |                                  |       |       |       |       |        |       |       |       |                                  |        |        |        |        |        |        |        |        |
| P <sup>2+</sup> : 1G20、1QH1、2MIN、4ND8、4WN9、4XPI、6O7M、6UG0                                                                      |                      |         |                                  |       |       |       |       |        |       |       |       |                                  |        |        |        |        |        |        |        |        |
| Dubious P <sup>2+</sup> : 1FP4、1G21                                                                                            |                      |         |                                  |       |       |       |       |        |       |       |       |                                  |        |        |        |        |        |        |        |        |
| Mutant P <sup>2+</sup> clusters (Fe8-O instead of Fe6-O): 5KOJ、6O7N                                                            |                      |         |                                  |       |       |       |       |        |       |       |       |                                  |        |        |        |        |        |        |        |        |
| <b>Superposed state P<sup>N/1+</sup> clusters in VFe proteins :</b>                                                            |                      |         |                                  |       |       |       |       |        |       |       |       |                                  |        |        |        |        |        |        |        |        |
| Unclear P <sup>N/1+</sup> (adopted the part of P <sup>N</sup> ): 6FEA、7ADR、7ADY、7AIZ                                           |                      |         |                                  |       |       |       |       |        |       |       |       |                                  |        |        |        |        |        |        |        |        |

**Table S3** The abandoned bond valence sums (abbreviated as Bval) of iron atoms in P<sup>N</sup> clusters which contain unreasonable structures and faulty data. Blank items present the valence of irons which are improper to be calculated due to unreasonable structures. Apparent faulty data in R<sub>0</sub> (+2) are bold highlighted. Further detail calculations of abandoned PDB entries are listed below Table S4 to Table S25.

| PDB code                                     | Resolution (Å) | Bval by using R <sub>0</sub> (+2) |              |              |              |              |       |       |              |               |       | Bval by using R <sub>0</sub> (+3) |       |       |       |       |       |       |        |
|----------------------------------------------|----------------|-----------------------------------|--------------|--------------|--------------|--------------|-------|-------|--------------|---------------|-------|-----------------------------------|-------|-------|-------|-------|-------|-------|--------|
|                                              |                | Fe1                               | Fe2          | Fe3          | Fe4          | Fe5          | Fe6   | Fe7   | Fe8          | 8Fe           | Fe1   | Fe2                               | Fe3   | Fe4   | Fe5   | Fe6   | Fe7   | Fe8   | 8Fe    |
| <b>P-cluster with unreasonable structure</b> |                |                                   |              |              |              |              |       |       |              |               |       |                                   |       |       |       |       |       |       |        |
| 1MIO <sup>2</sup>                            | 3.00           |                                   |              | 2.423        |              |              |       | 2.272 |              |               |       |                                   |       | 2.620 |       |       |       | 2.457 |        |
|                                              |                |                                   |              | 2.393        |              |              |       | 2.305 |              |               |       |                                   |       | 2.588 |       |       |       | 2.493 |        |
| 3K1A <sup>4</sup>                            | 2.23           | 2.244                             | <b>3.502</b> |              | <b>3.354</b> | 3.015        | 2.614 |       | <b>3.643</b> |               | 2.426 | 3.788                             |       | 3.627 | 3.261 | 2.827 |       | 3.940 |        |
|                                              |                | 2.301                             | <b>3.614</b> |              | <b>3.257</b> | <b>3.263</b> | 2.796 |       | <b>3.608</b> |               | 2.488 | 3.908                             |       | 3.523 | 3.529 | 3.024 |       | 3.902 |        |
| 6O7S <sup>5</sup>                            | 2.27           |                                   | 2.355        | 2.599        | 2.368        |              | 1.917 | 2.370 | 2.441        |               |       | 2.547                             | 2.811 | 2.561 |       | 2.073 | 2.563 | 2.640 |        |
|                                              |                |                                   | 2.265        | 2.561        | 2.409        |              | 1.924 | 2.297 | 2.491        |               |       | 2.449                             | 2.770 | 2.605 |       | 2.081 | 2.484 | 2.694 |        |
| <b>P-cluster with faulty data</b>            |                |                                   |              |              |              |              |       |       |              |               |       |                                   |       |       |       |       |       |       |        |
| 1M1Y <sup>6</sup>                            | 3.20           | 2.444                             | 2.491        | <b>3.459</b> | <b>4.768</b> | <b>3.762</b> | 2.197 | 1.962 | <b>3.231</b> | <b>24.314</b> | 2.643 | 2.694                             | 3.741 | 5.157 | 4.069 | 2.376 | 2.121 | 3.494 | 26.297 |
|                                              |                | 2.715                             | 2.352        | 3.026        | <b>3.819</b> | <b>3.272</b> | 2.299 | 2.032 | <b>3.477</b> | 22.993        | 2.937 | 2.544                             | 3.273 | 4.131 | 3.539 | 2.487 | 2.197 | 3.761 | 24.868 |
|                                              |                | 3.078                             | 2.560        | 3.098        | <b>5.553</b> | <b>4.466</b> | 2.484 | 2.401 | <b>3.391</b> | <b>27.030</b> | 3.329 | 2.768                             | 3.351 | 6.006 | 4.830 | 2.686 | 2.596 | 3.667 | 29.233 |
|                                              |                | 3.096                             | 2.316        | 2.769        | <b>3.326</b> | <b>3.195</b> | 2.313 | 1.993 | 2.824        | 21.832        | 3.348 | 2.505                             | 2.994 | 3.598 | 3.455 | 2.501 | 2.156 | 3.055 | 23.612 |
| 2AFI <sup>7</sup>                            | 3.10           | 2.965                             | 2.318        | 2.966        | <b>3.510</b> | <b>3.225</b> | 2.434 | 2.758 | <b>3.293</b> | 23.470        | 3.207 | 2.508                             | 3.207 | 3.796 | 3.488 | 2.633 | 2.983 | 3.562 | 25.383 |
|                                              |                | 3.033                             | 2.358        | 3.003        | <b>3.334</b> | <b>3.179</b> | 2.480 | 2.820 | <b>3.324</b> | 23.532        | 3.281 | 2.551                             | 3.248 | 3.606 | 3.438 | 2.682 | 3.050 | 3.595 | 25.451 |

|                   |      |              |              |              |              |              |       |              |              |               |       |       |       |       |       |       |       |       |        |
|-------------------|------|--------------|--------------|--------------|--------------|--------------|-------|--------------|--------------|---------------|-------|-------|-------|-------|-------|-------|-------|-------|--------|
|                   |      | <b>3.390</b> | 2.516        | 2.938        | <b>3.727</b> | <b>3.211</b> | 2.495 | 2.829        | <b>3.362</b> | <b>24.468</b> | 3.667 | 2.722 | 3.177 | 4.031 | 3.472 | 2.699 | 3.060 | 3.636 | 26.463 |
|                   |      | <b>3.224</b> | 2.247        | 2.990        | <b>3.380</b> | <b>3.138</b> | 2.364 | 2.820        | <b>3.300</b> | 23.464        | 3.487 | 2.430 | 3.234 | 3.656 | 3.394 | 2.557 | 3.050 | 3.569 | 25.377 |
| 6BBL <sup>8</sup> | 1.68 | <b>2.849</b> | 2.590        | <b>2.964</b> | 2.767        | 2.646        | 2.364 | 2.706        | 2.657        | 21.544        | 3.082 | 2.801 | 3.206 | 2.993 | 2.862 | 2.557 | 2.926 | 2.874 | 23.301 |
|                   |      | 2.569        | 2.725        | <b>2.894</b> | 2.641        | 2.591        | 2.336 | <b>2.839</b> | 2.648        | 21.243        | 2.779 | 2.948 | 3.130 | 2.856 | 2.802 | 2.527 | 3.070 | 2.864 | 22.975 |
| 6OP1 <sup>9</sup> | 1.70 | <b>3.173</b> | 2.811        | 3.077        | 2.834        | 2.256        | 2.089 | 2.177        | 2.291        | 20.708        | 3.096 | 2.857 | 3.309 | 3.407 | 2.371 | 2.269 | 2.401 | 2.479 | 22.189 |
|                   |      | 2.862        | 2.642        | 3.060        | <b>3.150</b> | 2.192        | 2.098 | 2.220        | 2.292        | 20.516        | 3.432 | 3.040 | 3.327 | 3.065 | 2.440 | 2.259 | 2.354 | 2.478 | 22.396 |
| 6OP2 <sup>9</sup> | 1.9  | 3.020        | 2.886        | <b>3.691</b> | <b>3.733</b> | 2.226        | 1.901 | 2.157        | 2.248        | 21.862        | 4.319 | 3.499 | 4.086 | 3.779 | 2.534 | 2.151 | 2.386 | 2.512 | 25.266 |
|                   |      | <b>3.994</b> | <b>3.235</b> | <b>3.778</b> | <b>3.494</b> | 2.343        | 1.989 | 2.206        | 2.323        | 23.362        | 3.266 | 3.121 | 3.992 | 4.038 | 2.407 | 2.055 | 2.333 | 2.432 | 23.644 |
| 6OP4 <sup>9</sup> | 2.3  | <b>3.216</b> | 3.067        | <b>3.905</b> | <b>3.780</b> | 2.189        | 1.994 | 2.386        | 2.637        | 23.175        | 3.479 | 3.317 | 4.223 | 4.088 | 2.368 | 2.157 | 2.581 | 2.852 | 25.065 |
|                   |      | <b>7.873</b> | <b>3.609</b> | <b>3.852</b> | <b>3.923</b> | 2.543        | 1.940 | 2.191        | 2.478        | <b>28.410</b> | 8.515 | 3.904 | 4.166 | 4.243 | 2.751 | 2.098 | 2.369 | 2.680 | 30.726 |

**Table S4** The abandoned bond valence analyses for irons in P-cluster [1] from MoFe protein 1MIO whose core structure modelled as  $[\text{Fe}_8\text{S}_8]$  at resolution of 3.0 Å. Bold bond distances and blank items present the valence of irons which are improper to be calculated due to unreasonable structures.

| Bond                  | $r_{ij}$ (Å) | $R_0$ (Å) | B (Å) | Bval  | Sum   | Diff.                 | $R_0$ (Å) | B (Å) | Bval  | Sum   | Diff.  |
|-----------------------|--------------|-----------|-------|-------|-------|-----------------------|-----------|-------|-------|-------|--------|
| expected valence = +2 |              |           |       |       |       | expected valence = +3 |           |       |       |       |        |
| Fe1-S1A               | 2.244        | 2.12      | 0.37  | 0.715 |       |                       | 2.149     | 0.370 | 0.774 |       |        |
| Fe1-S1B               | <b>4.538</b> | 2.12      | 0.37  |       |       |                       | 2.149     | 0.370 |       |       |        |
| Fe1-S2A               | 2.316        | 2.12      | 0.37  | 0.589 |       |                       | 2.149     | 0.370 | 0.637 |       |        |
| Fe1-S3A               | 2.318        | 2.12      | 0.37  | 0.586 |       |                       | 2.149     | 0.370 | 0.633 |       |        |
| Fe1-SG                | 2.307        | 2.12      | 0.37  | 0.603 | Blank |                       | 2.149     | 0.370 | 0.652 | Blank |        |
| Fe2-S1A               | 2.317        | 2.12      | 0.37  | 0.587 |       |                       | 2.149     | 0.370 | 0.635 |       |        |
| Fe2-S1B               | <b>3.641</b> | 2.12      | 0.37  |       |       |                       | 2.149     | 0.370 |       |       |        |
| Fe2-S2A               | 2.272        | 2.12      | 0.37  | 0.663 |       |                       | 2.149     | 0.370 | 0.717 |       |        |
| Fe2-S4A               | 2.332        | 2.12      | 0.37  | 0.564 |       |                       | 2.149     | 0.370 | 0.610 |       |        |
| Fe2-SG                | 2.265        | 2.12      | 0.37  | 0.676 | Blank |                       | 2.149     | 0.370 | 0.731 | Blank |        |
| Fe3-S2A               | 2.286        | 2.12      | 0.37  | 0.638 |       |                       | 2.149     | 0.370 | 0.691 |       |        |
| Fe3-S3A               | 2.312        | 2.12      | 0.37  | 0.595 |       |                       | 2.149     | 0.370 | 0.644 |       |        |
| Fe3-S4A               | 2.349        | 2.12      | 0.37  | 0.539 |       |                       | 2.149     | 0.370 | 0.582 |       |        |
| Fe3-SG                | 2.279        | 2.12      | 0.37  | 0.651 | 2.423 | 0.423                 | 2.149     | 0.370 | 0.704 | 2.620 | -0.380 |

|         |              |       |      |       |       |       |       |       |       |
|---------|--------------|-------|------|-------|-------|-------|-------|-------|-------|
| Fe4-S1A | 2.302        | 2.12  | 0.37 | 0.611 |       | 2.149 | 0.370 | 0.661 |       |
| Fe4-S1B | <b>3.572</b> | 2.12  | 0.37 | 0.020 |       | 2.149 | 0.370 | 0.021 |       |
| Fe4-S3A | 2.312        | 2.12  | 0.37 | 0.595 |       | 2.149 | 0.370 | 0.644 |       |
| Fe4-S4A | 2.301        | 2.12  | 0.37 | 0.613 |       | 2.149 | 0.370 | 0.663 |       |
| Fe4-SG  | 2.316        | 2.12  | 0.37 | 0.589 | Blank | 2.149 | 0.370 | 0.637 | Blank |
| Fe5-S1A | <b>3.802</b> | 2.12  | 0.37 |       |       | 2.149 | 0.370 |       |       |
| Fe5-S1B | 2.309        | 2.12  | 0.37 | 0.600 |       | 2.149 | 0.370 | 0.649 |       |
| Fe5-S2B | 2.302        | 2.12  | 0.37 | 0.611 |       | 2.149 | 0.370 | 0.661 |       |
| Fe5-S4B | 2.330        | 2.12  | 0.37 | 0.567 |       | 2.149 | 0.370 | 0.613 |       |
| Fe5-SG  | 2.292        | 2.12  | 0.37 | 0.628 |       | 2.149 | 0.370 | 0.679 |       |
| Fe5-N   | <b>2.949</b> | 1.769 | 0.37 |       | Blank | 1.815 | 0.370 |       | Blank |
| Fe6-S1A | <b>4.517</b> | 2.12  | 0.37 |       |       | 2.149 | 0.370 |       |       |
| Fe6-S1B | 2.246        | 2.12  | 0.37 | 0.711 |       | 2.149 | 0.370 | 0.769 |       |
| Fe6-S2B | 2.294        | 2.12  | 0.37 | 0.625 |       | 2.149 | 0.370 | 0.676 |       |
| Fe6-S3B | 2.316        | 2.12  | 0.37 | 0.589 |       | 2.149 | 0.370 | 0.637 |       |
| Fe6-SG  | 2.331        | 2.12  | 0.37 | 0.565 |       | 2.149 | 0.370 | 0.611 |       |
| Fe6-OG  | 2.218        | 1.715 | 0.37 | 0.257 | Blank | 1.749 | 0.370 | 0.282 | Blank |
| Fe7-S2B | 2.329        | 2.12  | 0.37 | 0.568 |       | 2.149 | 0.370 | 0.615 |       |
| Fe7-S3B | 2.316        | 2.12  | 0.37 | 0.589 |       | 2.149 | 0.370 | 0.637 |       |



|         |              |      |      |       |       |       |       |       |       |       |        |
|---------|--------------|------|------|-------|-------|-------|-------|-------|-------|-------|--------|
| Fe7-S4B | 2.351        | 2.12 | 0.37 | 0.536 |       |       | 2.149 | 0.370 | 0.579 |       |        |
| Fe7-SG  | 2.322        | 2.12 | 0.37 | 0.579 | 2.272 | 0.272 | 2.149 | 0.370 | 0.627 | 2.457 | -0.543 |
| Fe8-S1A | <b>3.511</b> | 2.12 | 0.37 |       |       |       | 2.149 | 0.370 |       |       |        |
| Fe8-S1B | 2.314        | 2.12 | 0.37 | 0.592 |       |       | 2.149 | 0.370 | 0.640 |       |        |
| Fe8-S3B | 2.276        | 2.12 | 0.37 | 0.656 |       |       | 2.149 | 0.370 | 0.709 |       |        |
| Fe8-S4B | 2.340        | 2.12 | 0.37 | 0.552 |       |       | 2.149 | 0.370 | 0.597 |       |        |
| Fe8-SG  | 2.293        | 2.12 | 0.37 | 0.627 | Blank |       | 2.149 | 0.370 | 0.678 | Blank |        |
|         |              |      |      |       | Blank |       |       |       |       | Blank |        |

**Table S5** The abandoned bond valence analyses for irons in P-cluster [2] from MoFe protein 1MIO whose core structure modelled as  $[\text{Fe}_8\text{S}_8]$  at resolution of 3.0 Å. Bold bond distances and blank items present the valence of irons which are improper to be calculated due to unreasonable structures.

| Bond                  | $r_{ij}$ (Å) | $R_0$ (Å) | B (Å) | Bval  | Sum   | Diff.                 | $R_0$ (Å) | B (Å) | Bval  | Sum   | Diff. |
|-----------------------|--------------|-----------|-------|-------|-------|-----------------------|-----------|-------|-------|-------|-------|
| expected valence = +2 |              |           |       |       |       | expected valence = +3 |           |       |       |       |       |
| Fe1-S1A               | 2.249        | 2.120     | 0.370 | 0.706 |       |                       | 2.149     | 0.370 | 0.763 |       |       |
| Fe1-S1B               | <b>4.570</b> | 2.120     | 0.370 |       |       |                       | 2.149     | 0.370 |       |       |       |
| Fe1-S2A               | 2.302        | 2.120     | 0.370 | 0.611 |       |                       | 2.149     | 0.370 | 0.661 |       |       |
| Fe1-S3A               | 2.331        | 2.120     | 0.370 | 0.565 |       |                       | 2.149     | 0.370 | 0.611 |       |       |
| Fe1-SG                | 2.305        | 2.120     | 0.370 | 0.607 | Blank |                       | 2.149     | 0.370 | 0.656 | Blank |       |
| Fe2-S1A               | 2.284        | 2.120     | 0.370 | 0.642 |       |                       | 2.149     | 0.370 | 0.694 |       |       |

|         |              |       |       |       |       |       |       |       |       |              |
|---------|--------------|-------|-------|-------|-------|-------|-------|-------|-------|--------------|
| Fe2-S1B | <b>3.888</b> | 2.120 | 0.370 |       |       |       | 2.149 | 0.370 |       |              |
| Fe2-S2A | 2.265        | 2.120 | 0.370 | 0.676 |       |       | 2.149 | 0.370 | 0.731 |              |
| Fe2-S4A | 2.304        | 2.120 | 0.370 | 0.608 |       |       | 2.149 | 0.370 | 0.658 |              |
| Fe2-SG  | 2.264        | 2.120 | 0.370 | 0.678 | Blank |       | 2.149 | 0.370 | 0.733 | Blank        |
| Fe3-S2A | 2.300        | 2.120 | 0.370 | 0.615 |       |       | 2.149 | 0.370 | 0.665 |              |
| Fe3-S3A | 2.312        | 2.120 | 0.370 | 0.595 |       |       | 2.149 | 0.370 | 0.644 |              |
| Fe3-S4A | 2.327        | 2.120 | 0.370 | 0.572 |       |       | 2.149 | 0.370 | 0.618 |              |
| Fe3-SG  | 2.302        | 2.120 | 0.370 | 0.611 | 2.393 | 0.393 | 2.149 | 0.370 | 0.661 | 2.588 -0.412 |
| Fe4-S1A | 2.278        | 2.120 | 0.370 | 0.652 |       |       | 2.149 | 0.370 | 0.706 |              |
| Fe4-S1B | <b>3.649</b> | 2.120 | 0.370 |       |       |       | 2.149 | 0.370 |       |              |
| Fe4-S3A | 2.310        | 2.120 | 0.370 | 0.598 |       |       | 2.149 | 0.370 | 0.647 |              |
| Fe4-S4A | 2.321        | 2.120 | 0.370 | 0.581 |       |       | 2.149 | 0.370 | 0.628 |              |
| Fe4-SG  | 2.312        | 2.120 | 0.370 | 0.595 | Blank |       | 2.149 | 0.370 | 0.644 | Blank        |
| Fe5-S1A | <b>3.606</b> | 2.120 | 0.370 |       |       |       | 2.149 | 0.370 |       |              |
| Fe5-S1B | 2.371        | 2.120 | 0.370 | 0.507 |       |       | 2.149 | 0.370 | 0.549 |              |
| Fe5-S2B | 2.296        | 2.120 | 0.370 | 0.621 |       |       | 2.149 | 0.370 | 0.672 |              |
| Fe5-S4B | 2.346        | 2.120 | 0.370 | 0.543 |       |       | 2.149 | 0.370 | 0.587 |              |
| Fe5-SG  | 2.276        | 2.120 | 0.370 | 0.656 |       |       | 2.149 | 0.370 | 0.709 |              |
| Fe5-N   | <b>3.303</b> | 1.769 | 0.370 |       | Blank |       | 1.815 | 0.370 |       | Blank        |

|         |              |       |       |       |       |       |       |       |       |       |        |
|---------|--------------|-------|-------|-------|-------|-------|-------|-------|-------|-------|--------|
| Fe6-S1A | <b>4.591</b> | 2.120 | 0.370 |       |       |       | 2.149 | 0.370 |       |       |        |
| Fe6-S1B | 2.293        | 2.120 | 0.370 | 0.627 |       |       | 2.149 | 0.370 | 0.678 |       |        |
| Fe6-S2B | 2.297        | 2.120 | 0.370 | 0.620 |       |       | 2.149 | 0.370 | 0.670 |       |        |
| Fe6-S3B | 2.303        | 2.120 | 0.370 | 0.610 |       |       | 2.149 | 0.370 | 0.660 |       |        |
| Fe6-SG  | 2.310        | 2.120 | 0.370 | 0.598 |       |       | 2.149 | 0.370 | 0.647 |       |        |
| Fe6-OG  | 2.211        | 1.715 | 0.370 | 0.262 | Blank |       | 1.749 | 0.370 | 0.287 | Blank |        |
| Fe7-S2B | 2.330        | 2.120 | 0.370 | 0.567 |       |       | 2.149 | 0.370 | 0.613 |       |        |
| Fe7-S3B | 2.336        | 2.120 | 0.370 | 0.558 |       |       | 2.149 | 0.370 | 0.603 |       |        |
| Fe7-S4B | 2.312        | 2.120 | 0.370 | 0.595 |       |       | 2.149 | 0.370 | 0.644 |       |        |
| Fe7-SG  | 2.318        | 2.120 | 0.370 | 0.586 | 2.305 | 0.305 | 2.149 | 0.370 | 0.633 | 2.493 | -0.507 |
| Fe8-S1A | <b>3.249</b> | 2.120 | 0.370 |       |       |       | 2.149 | 0.370 |       |       |        |
| Fe8-S1B | 2.314        | 2.120 | 0.370 | 0.592 |       |       | 2.149 | 0.370 | 0.640 |       |        |
| Fe8-S3B | 2.271        | 2.120 | 0.370 | 0.665 |       |       | 2.149 | 0.370 | 0.719 |       |        |
| Fe8-S4B | 2.391        | 2.120 | 0.370 | 0.481 |       |       | 2.149 | 0.370 | 0.520 |       |        |
| Fe8-SG  | 2.258        | 2.120 | 0.370 | 0.689 | Blank |       | 2.149 | 0.370 | 0.745 | Blank |        |
|         |              |       |       |       | Blank |       |       |       |       | Blank |        |

---

**Table S6** The abandoned valence analyses for irons in P-cluster [1] from MoFe protein 3K1A which perform as P<sup>N</sup> but its Fe3 and Fe7 dissociate with S atom at resolution of 2.3 Å. Bold bond distances and blank items present the valence of irons which are improper to be calculated due to unreasonable structures.

| Bond                  | $r_{ij}$ (Å) | $R_0$ (Å) | B (Å) | Bval  | Sum          | Diff.                 | $R_0$ (Å) | B (Å) | Bval  | Sum   | Diff.  |
|-----------------------|--------------|-----------|-------|-------|--------------|-----------------------|-----------|-------|-------|-------|--------|
| expected valence = +2 |              |           |       |       |              | expected valence = +3 |           |       |       |       |        |
| Fe1-S1                | 2.579        | 2.12      | 0.37  | 0.289 |              |                       | 2.149     | 0.37  | 0.313 |       |        |
| Fe1-S2A               | 2.249        | 2.12      | 0.37  | 0.706 |              |                       | 2.149     | 0.37  | 0.763 |       |        |
| Fe1-S3A               | 2.189        | 2.12      | 0.37  | 0.830 |              |                       | 2.149     | 0.37  | 0.898 |       |        |
| Fe1-SG                | 2.442        | 2.12      | 0.37  | 0.419 | 2.244        | 0.244                 | 2.149     | 0.37  | 0.453 | 2.426 | -0.574 |
| Fe2-S1                | 1.928        | 2.12      | 0.37  | 1.680 |              |                       | 2.149     | 0.37  | 1.817 |       |        |
| Fe2-S2A               | 2.192        | 2.12      | 0.37  | 0.823 |              |                       | 2.149     | 0.37  | 0.890 |       |        |
| Fe2-S4A               | 2.230        | 2.12      | 0.37  | 0.743 |              |                       | 2.149     | 0.37  | 0.803 |       |        |
| Fe2-SG                | 2.624        | 2.12      | 0.37  | 0.256 | <b>3.502</b> | 1.502                 | 2.149     | 0.37  | 0.277 | 3.788 | 0.788  |
| Fe3-S2A               | 2.175        | 2.12      | 0.37  | 0.862 |              |                       | 2.149     | 0.37  | 0.932 |       |        |
| Fe3-S3A               | 2.191        | 2.12      | 0.37  | 0.825 |              |                       | 2.149     | 0.37  | 0.893 |       |        |
| Fe3-S4A               | 2.172        | 2.12      | 0.37  | 0.869 |              |                       | 2.149     | 0.37  | 0.940 |       |        |
| Fe3-SG                | <b>2.746</b> | 2.12      | 0.37  |       | Blank        |                       | 2.149     | 0.37  |       | Blank |        |
| Fe4-S1                | 2.126        | 2.12      | 0.37  | 0.984 |              |                       | 2.149     | 0.37  | 1.064 |       |        |
| Fe4-S3A               | 2.209        | 2.12      | 0.37  | 0.786 |              |                       | 2.149     | 0.37  | 0.850 |       |        |

|         |              |      |      |       |              |       |       |      |       |       |        |
|---------|--------------|------|------|-------|--------------|-------|-------|------|-------|-------|--------|
| Fe4-S4A | 2.215        | 2.12 | 0.37 | 0.774 |              |       | 2.149 | 0.37 | 0.837 |       |        |
| Fe4-SG  | 2.198        | 2.12 | 0.37 | 0.810 | <b>3.354</b> | 1.354 | 2.149 | 0.37 | 0.876 | 3.627 | 0.627  |
| Fe5-S1  | 2.160        | 2.12 | 0.37 | 0.898 |              |       | 2.149 | 0.37 | 0.971 |       |        |
| Fe5-S2B | 2.223        | 2.12 | 0.37 | 0.757 |              |       | 2.149 | 0.37 | 0.819 |       |        |
| Fe5-S4B | 2.218        | 2.12 | 0.37 | 0.767 |              |       | 2.149 | 0.37 | 0.830 |       |        |
| Fe5-SG  | 2.313        | 2.12 | 0.37 | 0.594 | <b>3.015</b> | 1.015 | 2.149 | 0.37 | 0.642 | 3.261 | 0.261  |
| Fe6-S1  | 2.192        | 2.12 | 0.37 | 0.823 |              |       | 2.149 | 0.37 | 0.890 |       |        |
| Fe6-S2B | 2.206        | 2.12 | 0.37 | 0.793 |              |       | 2.149 | 0.37 | 0.857 |       |        |
| Fe6-S3B | 2.208        | 2.12 | 0.37 | 0.788 |              |       | 2.149 | 0.37 | 0.853 |       |        |
| Fe6-SG  | 2.698        | 2.12 | 0.37 | 0.210 | 2.614        | 0.614 | 2.149 | 0.37 | 0.227 | 2.827 | -0.173 |
| Fe7-S2B | 2.203        | 2.12 | 0.37 | 0.799 |              |       | 2.149 | 0.37 | 0.864 |       |        |
| Fe7-S3B | 2.169        | 2.12 | 0.37 | 0.876 |              |       | 2.149 | 0.37 | 0.947 |       |        |
| Fe7-S4B | 2.152        | 2.12 | 0.37 | 0.917 |              |       | 2.149 | 0.37 | 0.992 |       |        |
| Fe7-SG  | <b>3.281</b> | 2.12 | 0.37 |       | Blank        |       | 2.149 | 0.37 |       | Blank |        |
| Fe8-S1  | 1.961        | 2.12 | 0.37 | 1.537 |              |       | 2.149 | 0.37 | 1.662 |       |        |
| Fe8-S3B | 2.234        | 2.12 | 0.37 | 0.735 |              |       | 2.149 | 0.37 | 0.795 |       |        |
| Fe8-S4B | 2.236        | 2.12 | 0.37 | 0.731 |              |       | 2.149 | 0.37 | 0.790 |       |        |
| Fe8-SG  | 2.285        | 2.12 | 0.37 | 0.640 | <b>3.643</b> | 1.643 | 2.149 | 0.37 | 0.692 | 3.940 | 0.940  |
|         |              |      |      |       | Blank        |       |       |      |       | Blank |        |

**Table S7** The abandoned valence analyses for irons in P-cluster [2] from MoFe protein 3K1A which perform as P<sup>N</sup> but its Fe3 and Fe7 dissociate with S atom at resolution of 2.3 Å. Bold bond distances and blank items present the valence of iron which are improper to be calculated due to unreasonable structures.

| Bond                  | $r_{ij}$ (Å) | $R_0$ (Å) | B (Å) | Bval  | Sum          | Diff.                 | $R_0$ (Å) | B (Å) | Bval  | Sum   | Diff.  |
|-----------------------|--------------|-----------|-------|-------|--------------|-----------------------|-----------|-------|-------|-------|--------|
| expected valence = +2 |              |           |       |       |              | expected valence = +3 |           |       |       |       |        |
| Fe1-S1                | 2.578        | 2.12      | 0.37  | 0.290 |              |                       | 2.149     | 0.37  | 0.314 |       |        |
| Fe1-S2A               | 2.240        | 2.12      | 0.37  | 0.723 |              |                       | 2.149     | 0.37  | 0.782 |       |        |
| Fe1-S3A               | 2.208        | 2.12      | 0.37  | 0.788 |              |                       | 2.149     | 0.37  | 0.853 |       |        |
| Fe1-SG                | 2.377        | 2.12      | 0.37  | 0.499 | 2.301        | 0.301                 | 2.149     | 0.37  | 0.540 | 2.488 | -0.512 |
| Fe2-S1                | 1.907        | 2.12      | 0.37  | 1.778 |              |                       | 2.149     | 0.37  | 1.923 |       |        |
| Fe2-S2A               | 2.197        | 2.12      | 0.37  | 0.812 |              |                       | 2.149     | 0.37  | 0.878 |       |        |
| Fe2-S4A               | 2.228        | 2.12      | 0.37  | 0.747 |              |                       | 2.149     | 0.37  | 0.808 |       |        |
| Fe2-SG                | 2.596        | 2.12      | 0.37  | 0.276 | <b>3.614</b> | 1.614                 | 2.149     | 0.37  | 0.299 | 3.908 | 0.908  |
| Fe3-S2A               | 2.174        | 2.12      | 0.37  | 0.864 |              |                       | 2.149     | 0.37  | 0.935 |       |        |
| Fe3-S3A               | 2.175        | 2.12      | 0.37  | 0.862 |              |                       | 2.149     | 0.37  | 0.932 |       |        |
| Fe3-S4A               | 2.173        | 2.12      | 0.37  | 0.867 |              |                       | 2.149     | 0.37  | 0.937 |       |        |
| Fe3-SG                | <b>2.734</b> | 2.12      | 0.37  |       | Blank        |                       | 2.149     | 0.37  |       | Blank |        |
| Fe4-S1                | 2.114        | 2.12      | 0.37  | 1.016 |              |                       | 2.149     | 0.37  | 1.099 |       |        |
| Fe4-S3A               | 2.212        | 2.12      | 0.37  | 0.780 |              |                       | 2.149     | 0.37  | 0.843 |       |        |

|         |              |      |      |       |              |       |       |      |       |       |       |
|---------|--------------|------|------|-------|--------------|-------|-------|------|-------|-------|-------|
| Fe4-S4A | 2.213        | 2.12 | 0.37 | 0.778 |              |       | 2.149 | 0.37 | 0.841 |       |       |
| Fe4-SG  | 2.261        | 2.12 | 0.37 | 0.683 | <b>3.257</b> | 1.257 | 2.149 | 0.37 | 0.739 | 3.523 | 0.523 |
| Fe5-S1  | 2.132        | 2.12 | 0.37 | 0.968 |              |       | 2.149 | 0.37 | 1.047 |       |       |
| Fe5-S2B | 2.227        | 2.12 | 0.37 | 0.749 |              |       | 2.149 | 0.37 | 0.810 |       |       |
| Fe5-S4B | 2.200        | 2.12 | 0.37 | 0.806 |              |       | 2.149 | 0.37 | 0.871 |       |       |
| Fe5-SG  | 2.231        | 2.12 | 0.37 | 0.741 | <b>3.263</b> | 1.263 | 2.149 | 0.37 | 0.801 | 3.529 | 0.529 |
| Fe6-S1  | 2.174        | 2.12 | 0.37 | 0.864 |              |       | 2.149 | 0.37 | 0.935 |       |       |
| Fe6-S2B | 2.193        | 2.12 | 0.37 | 0.821 |              |       | 2.149 | 0.37 | 0.888 |       |       |
| Fe6-S3B | 2.204        | 2.12 | 0.37 | 0.797 |              |       | 2.149 | 0.37 | 0.862 |       |       |
| Fe6-SG  | 2.549        | 2.12 | 0.37 | 0.314 | 2.796        | 0.796 | 2.149 | 0.37 | 0.339 | 3.024 | 0.024 |
| Fe7-S2B | 2.211        | 2.12 | 0.37 | 0.782 |              |       | 2.149 | 0.37 | 0.846 |       |       |
| Fe7-S3B | 2.162        | 2.12 | 0.37 | 0.893 |              |       | 2.149 | 0.37 | 0.965 |       |       |
| Fe7-S4B | 2.162        | 2.12 | 0.37 | 0.893 |              |       | 2.149 | 0.37 | 0.965 |       |       |
| Fe7-SG  | <b>3.265</b> | 2.12 | 0.37 |       | Blank        |       | 2.149 | 0.37 |       | Blank |       |
| Fe8-S1  | 1.982        | 2.12 | 0.37 | 1.452 |              |       | 2.149 | 0.37 | 1.570 |       |       |
| Fe8-S3B | 2.240        | 2.12 | 0.37 | 0.723 |              |       | 2.149 | 0.37 | 0.782 |       |       |
| Fe8-S4B | 2.222        | 2.12 | 0.37 | 0.759 |              |       | 2.149 | 0.37 | 0.821 |       |       |
| Fe8-SG  | 2.266        | 2.12 | 0.37 | 0.674 | <b>3.608</b> | 1.608 | 2.149 | 0.37 | 0.729 | 3.902 | 0.902 |
|         |              |      |      |       | Blank        |       |       |      |       | Blank |       |

**Table S8** The abandoned valence analyses for irons in P-cluster [1] from MoFe protein 6O7S which absent Fe1 and Fe5 at resolution of 2.7Å. Blank items present the valence of irons which are improper to be calculated due to unreasonable structures.

| Bond                  | $r_{ij}$ (Å) | $R_0$ (Å) | B (Å) | Bval  | Sum   | Diff.                 | $R_0$ (Å) | B (Å) | Bval  | Sum   | Diff.  |
|-----------------------|--------------|-----------|-------|-------|-------|-----------------------|-----------|-------|-------|-------|--------|
| expected valence = +2 |              |           |       |       |       | expected valence = +3 |           |       |       |       |        |
| Fe1-S1                |              |           |       |       |       |                       |           |       |       |       |        |
| Fe1-S2A               |              |           |       |       |       |                       |           |       |       |       |        |
| Fe1-S3A               |              |           |       |       |       |                       |           |       |       |       |        |
| Fe1-SG                |              |           |       |       | Blank |                       |           |       |       | Blank |        |
| Fe2-S1                | 2.372        | 2.12      | 0.37  | 0.506 |       |                       | 2.149     | 0.37  | 0.547 |       |        |
| Fe2-S2A               | 2.261        | 2.12      | 0.37  | 0.683 |       |                       | 2.149     | 0.37  | 0.739 |       |        |
| Fe2-S4A               | 2.274        | 2.12      | 0.37  | 0.660 |       |                       | 2.149     | 0.37  | 0.713 |       |        |
| Fe2-SG                | 2.372        | 2.12      | 0.37  | 0.506 | 2.355 | 0.355                 | 2.149     | 0.37  | 0.547 | 2.547 | -0.453 |
| Fe3-S2A               | 2.270        | 2.12      | 0.37  | 0.667 |       |                       | 2.149     | 0.37  | 0.721 |       |        |
| Fe3-S3A               | 2.253        | 2.12      | 0.37  | 0.698 |       |                       | 2.149     | 0.37  | 0.755 |       |        |
| Fe3-S4A               | 2.298        | 2.12      | 0.37  | 0.618 |       |                       | 2.149     | 0.37  | 0.669 |       |        |
| Fe3-SG                | 2.299        | 2.12      | 0.37  | 0.616 | 2.599 | 0.599                 | 2.149     | 0.37  | 0.667 | 2.811 | -0.189 |
| Fe4-S1                | 2.330        | 2.12      | 0.37  | 0.567 |       |                       | 2.149     | 0.37  | 0.613 |       |        |
| Fe4-S3A               | 2.269        | 2.12      | 0.37  | 0.669 |       |                       | 2.149     | 0.37  | 0.723 |       |        |



|         |       |      |      |       |       |        |       |      |       |       |        |
|---------|-------|------|------|-------|-------|--------|-------|------|-------|-------|--------|
| Fe4-S4A | 2.285 | 2.12 | 0.37 | 0.640 |       |        | 2.149 | 0.37 | 0.692 |       |        |
| Fe4-SG  | 2.382 | 2.12 | 0.37 | 0.493 | 2.368 | 0.368  | 2.149 | 0.37 | 0.533 | 2.561 | -0.439 |
| Fe5-S1  |       |      |      |       |       |        |       |      |       |       |        |
| Fe5-S2B |       |      |      |       |       |        |       |      |       |       |        |
| Fe5-S4B |       |      |      |       |       |        |       |      |       |       |        |
| Fe5-SG  |       |      |      |       | Blank |        |       |      |       | Blank |        |
| Fe6-S1  | 2.612 | 2.12 | 0.37 | 0.265 |       |        | 2.149 | 0.37 | 0.286 |       |        |
| Fe6-S2B | 2.315 | 2.12 | 0.37 | 0.590 |       |        | 2.149 | 0.37 | 0.638 |       |        |
| Fe6-S3B | 2.309 | 2.12 | 0.37 | 0.600 |       |        | 2.149 | 0.37 | 0.649 |       |        |
| Fe6-SG  | 2.406 | 2.12 | 0.37 | 0.462 | 1.917 | -0.083 | 2.149 | 0.37 | 0.499 | 2.073 | -0.927 |
| Fe7-S2B | 2.294 | 2.12 | 0.37 | 0.625 |       |        | 2.149 | 0.37 | 0.676 |       |        |
| Fe7-S3B | 2.296 | 2.12 | 0.37 | 0.621 |       |        | 2.149 | 0.37 | 0.672 |       |        |
| Fe7-S4B | 2.277 | 2.12 | 0.37 | 0.654 |       |        | 2.149 | 0.37 | 0.708 |       |        |
| Fe7-SG  | 2.400 | 2.12 | 0.37 | 0.469 | 2.370 | 0.370  | 2.149 | 0.37 | 0.507 | 2.563 | -0.437 |
| Fe8-S1  | 2.307 | 2.12 | 0.37 | 0.603 |       |        | 2.149 | 0.37 | 0.652 |       |        |
| Fe8-S3B | 2.305 | 2.12 | 0.37 | 0.607 |       |        | 2.149 | 0.37 | 0.656 |       |        |
| Fe8-S4B | 2.317 | 2.12 | 0.37 | 0.587 |       |        | 2.149 | 0.37 | 0.635 |       |        |
| Fe8-SG  | 2.283 | 2.12 | 0.37 | 0.644 | 2.441 | 0.441  | 2.149 | 0.37 | 0.696 | 2.640 | -0.360 |
|         |       |      |      |       | Blank |        |       |      |       | Blank |        |

---

**Table S9** The abandoned valence analyses for irons in P-cluster [2] from MoFe protein 6O7S which absent Fe1 and Fe5 at resolution of 2.7 Å. Blank items present the valence of irons which are improper to be calculated due to unreasonable structures.

| Bond                  | $r_{ij}$ (Å) | $R_0$ (Å) | B (Å) | Bval  | Sum   | Diff.                 | $R_0$ (Å) | B (Å) | Bval  | Sum   | Diff.  |
|-----------------------|--------------|-----------|-------|-------|-------|-----------------------|-----------|-------|-------|-------|--------|
| expected valence = +2 |              |           |       |       |       | expected valence = +3 |           |       |       |       |        |
| Fe1-S1                |              |           |       |       |       |                       |           |       |       |       |        |
| Fe1-S2A               |              |           |       |       |       |                       |           |       |       |       |        |
| Fe1-S3A               |              |           |       |       |       |                       |           |       |       |       |        |
| Fe1-SG                |              |           |       |       | Blank |                       |           |       |       | Blank |        |
| Fe2-S1                | 2.374        | 2.120     | 0.370 | 0.503 |       |                       | 2.149     | 0.370 | 0.544 |       |        |
| Fe2-S2A               | 2.246        | 2.120     | 0.370 | 0.711 |       |                       | 2.149     | 0.370 | 0.769 |       |        |
| Fe2-S4A               | 2.297        | 2.120     | 0.370 | 0.620 |       |                       | 2.149     | 0.370 | 0.670 |       |        |
| Fe2-SG                | 2.432        | 2.120     | 0.370 | 0.430 | 2.265 | 0.265                 | 2.149     | 0.370 | 0.465 | 2.449 | -0.551 |
| Fe3-S2A               | 2.283        | 2.120     | 0.370 | 0.644 |       |                       | 2.149     | 0.370 | 0.696 |       |        |
| Fe3-S3A               | 2.244        | 2.120     | 0.370 | 0.715 |       |                       | 2.149     | 0.370 | 0.774 |       |        |
| Fe3-S4A               | 2.301        | 2.120     | 0.370 | 0.613 |       |                       | 2.149     | 0.370 | 0.663 |       |        |
| Fe3-SG                | 2.316        | 2.120     | 0.370 | 0.589 | 2.561 | 0.561                 | 2.149     | 0.370 | 0.637 | 2.770 | -0.230 |
| Fe4-S1                | 2.336        | 2.120     | 0.370 | 0.558 |       |                       | 2.149     | 0.370 | 0.603 |       |        |
| Fe4-S3A               | 2.265        | 2.120     | 0.370 | 0.676 |       |                       | 2.149     | 0.370 | 0.731 |       |        |

|         |       |       |       |       |       |        |       |       |       |       |        |
|---------|-------|-------|-------|-------|-------|--------|-------|-------|-------|-------|--------|
| Fe4-S4A | 2.283 | 2.120 | 0.370 | 0.644 |       |        | 2.149 | 0.370 | 0.696 |       |        |
| Fe4-SG  | 2.354 | 2.120 | 0.370 | 0.531 | 2.409 | 0.409  | 2.149 | 0.370 | 0.575 | 2.605 | -0.395 |
| Fe5-S1  |       |       |       |       |       |        |       |       |       |       |        |
| Fe5-S2B |       |       |       |       |       |        |       |       |       |       |        |
| Fe5-S4B |       |       |       |       |       |        |       |       |       |       |        |
| Fe5-SG  |       |       |       |       | Blank |        |       |       |       | Blank |        |
| Fe6-S1  | 2.622 | 2.120 | 0.370 | 0.257 |       |        | 2.149 | 0.370 | 0.278 |       |        |
| Fe6-S2B | 2.313 | 2.120 | 0.370 | 0.594 |       |        | 2.149 | 0.370 | 0.642 |       |        |
| Fe6-S3B | 2.303 | 2.120 | 0.370 | 0.610 |       |        | 2.149 | 0.370 | 0.660 |       |        |
| Fe6-SG  | 2.405 | 2.120 | 0.370 | 0.463 | 1.924 | -0.076 | 2.149 | 0.370 | 0.501 | 2.081 | -0.919 |
| Fe7-S2B | 2.310 | 2.120 | 0.370 | 0.598 |       |        | 2.149 | 0.370 | 0.647 |       |        |
| Fe7-S3B | 2.306 | 2.120 | 0.370 | 0.605 |       |        | 2.149 | 0.370 | 0.654 |       |        |
| Fe7-S4B | 2.280 | 2.120 | 0.370 | 0.649 |       |        | 2.149 | 0.370 | 0.702 |       |        |
| Fe7-SG  | 2.420 | 2.120 | 0.370 | 0.444 | 2.297 | 0.297  | 2.149 | 0.370 | 0.481 | 2.484 | -0.516 |
| Fe8-S1  | 2.289 | 2.120 | 0.370 | 0.633 |       |        | 2.149 | 0.370 | 0.685 |       |        |
| Fe8-S3B | 2.306 | 2.120 | 0.370 | 0.605 |       |        | 2.149 | 0.370 | 0.654 |       |        |
| Fe8-S4B | 2.319 | 2.120 | 0.370 | 0.584 |       |        | 2.149 | 0.370 | 0.632 |       |        |
| Fe8-SG  | 2.269 | 2.120 | 0.370 | 0.669 | 2.491 | 0.491  | 2.149 | 0.370 | 0.723 | 2.694 | -0.306 |
|         |       |       |       |       | Blank |        |       |       |       | Blank |        |

**Table S10** The abandoned valence analyses for irons in P-cluster [1] from MoFe protein 1M1Y at resolution of 3.2 Å. Faulty data in  $R_0$  (+2) are bold highlighted.

| Bond                  | $r_{ij}$ (Å) | $R_0$ (Å) | B (Å) | Bval  | Sum          | Diff.                 | $R_0$ (Å) | B (Å) | Bval  | Sum   | Diff.  |
|-----------------------|--------------|-----------|-------|-------|--------------|-----------------------|-----------|-------|-------|-------|--------|
| expected valence = +2 |              |           |       |       |              | expected valence = +3 |           |       |       |       |        |
| Fe1-S1                | 2.508        | 2.120     | 0.370 | 0.350 |              |                       | 2.149     | 0.370 | 0.379 |       |        |
| Fe1-S2A               | 2.284        | 2.120     | 0.370 | 0.642 |              |                       | 2.149     | 0.370 | 0.694 |       |        |
| Fe1-S3A               | 2.266        | 2.120     | 0.370 | 0.674 |              |                       | 2.149     | 0.370 | 0.729 |       |        |
| Fe1-SG                | 2.213        | 2.120     | 0.370 | 0.778 | 2.444        | 0.444                 | 2.149     | 0.370 | 0.841 | 2.643 | -0.357 |
| Fe2-S1                | 2.331        | 2.120     | 0.370 | 0.565 |              |                       | 2.149     | 0.370 | 0.611 |       |        |
| Fe2-S2A               | 2.157        | 2.120     | 0.370 | 0.905 |              |                       | 2.149     | 0.370 | 0.979 |       |        |
| Fe2-S4A               | 2.205        | 2.120     | 0.370 | 0.795 |              |                       | 2.149     | 0.370 | 0.860 |       |        |
| Fe2-SG                | 2.670        | 2.120     | 0.370 | 0.226 | 2.491        | 0.491                 | 2.149     | 0.370 | 0.245 | 2.694 | -0.306 |
| Fe3-S2A               | 2.306        | 2.120     | 0.370 | 0.605 |              |                       | 2.149     | 0.370 | 0.654 |       |        |
| Fe3-S3A               | 2.260        | 2.120     | 0.370 | 0.685 |              |                       | 2.149     | 0.370 | 0.741 |       |        |
| Fe3-S4A               | 2.247        | 2.120     | 0.370 | 0.709 |              |                       | 2.149     | 0.370 | 0.767 |       |        |
| Fe3-SG                | 1.980        | 2.120     | 0.370 | 1.460 | <b>3.459</b> | 1.459                 | 2.149     | 0.370 | 1.579 | 3.741 | 0.741  |
| Fe4-S1                | 2.558        | 2.120     | 0.370 | 0.306 |              |                       | 2.149     | 0.370 | 0.331 |       |        |
| Fe4-S3A               | 2.217        | 2.120     | 0.370 | 0.769 |              |                       | 2.149     | 0.370 | 0.832 |       |        |
| Fe4-S4A               | 2.241        | 2.120     | 0.370 | 0.721 |              |                       | 2.149     | 0.370 | 0.780 |       |        |

|         |       |       |       |       |              |        |       |       |       |        |        |
|---------|-------|-------|-------|-------|--------------|--------|-------|-------|-------|--------|--------|
| Fe4-SG  | 1.717 | 2.120 | 0.370 | 2.972 | <b>4.768</b> | 2.768  | 2.149 | 0.370 | 3.214 | 5.157  | 2.157  |
| Fe5-S1  | 2.579 | 2.120 | 0.370 | 0.289 |              |        | 2.149 | 0.370 | 0.313 |        |        |
| Fe5-S2B | 2.312 | 2.120 | 0.370 | 0.595 |              |        | 2.149 | 0.370 | 0.644 |        |        |
| Fe5-S4B | 2.285 | 2.120 | 0.370 | 0.640 |              |        | 2.149 | 0.370 | 0.692 |        |        |
| Fe5-SG  | 1.822 | 2.120 | 0.370 | 2.238 | <b>3.762</b> | 1.762  | 2.149 | 0.370 | 2.420 | 4.069  | 1.069  |
| Fe6-S1  | 2.369 | 2.120 | 0.370 | 0.510 |              |        | 2.149 | 0.370 | 0.552 |        |        |
| Fe6-S2B | 2.200 | 2.120 | 0.370 | 0.806 |              |        | 2.149 | 0.370 | 0.871 |        |        |
| Fe6-S3B | 2.239 | 2.120 | 0.370 | 0.725 |              |        | 2.149 | 0.370 | 0.784 |        |        |
| Fe6-SG  | 2.807 | 2.120 | 0.370 | 0.156 | 2.197        | 0.197  | 2.149 | 0.370 | 0.169 | 2.376  | -0.624 |
| Fe7-S2B | 2.353 | 2.120 | 0.370 | 0.533 |              |        | 2.149 | 0.370 | 0.576 |        |        |
| Fe7-S3B | 2.358 | 2.120 | 0.370 | 0.526 |              |        | 2.149 | 0.370 | 0.568 |        |        |
| Fe7-S4B | 2.291 | 2.120 | 0.370 | 0.630 |              |        | 2.149 | 0.370 | 0.681 |        |        |
| Fe7-SG  | 2.600 | 2.120 | 0.370 | 0.273 | 1.962        | -0.038 | 2.149 | 0.370 | 0.296 | 2.121  | -0.879 |
| Fe8-S1  | 2.519 | 2.120 | 0.370 | 0.340 |              |        | 2.149 | 0.370 | 0.368 |        |        |
| Fe8-S3B | 2.303 | 2.120 | 0.370 | 0.610 |              |        | 2.149 | 0.370 | 0.660 |        |        |
| Fe8-S4B | 2.389 | 2.120 | 0.370 | 0.483 |              |        | 2.149 | 0.370 | 0.523 |        |        |
| Fe8-SG  | 1.903 | 2.120 | 0.370 | 1.798 | <b>3.231</b> | 1.231  | 2.149 | 0.370 | 1.944 | 3.494  | 0.494  |
|         |       |       |       |       | 24.314       |        |       |       |       | 26.297 |        |

---

**Table S11** The abandoned valence analyses for irons in P-cluster [2] from MoFe protein 1M1Y at resolution of 3.2 Å. Faulty data in  $R_0$  (+2) are bold highlighted.

| Bond                  | $r_{ij}$ (Å) | $R_0$ (Å) | B (Å) | Bval  | Sum   | Diff.                 | $R_0$ (Å) | B (Å) | Bval  | Sum   | Diff.  |
|-----------------------|--------------|-----------|-------|-------|-------|-----------------------|-----------|-------|-------|-------|--------|
| expected valence = +2 |              |           |       |       |       | expected valence = +3 |           |       |       |       |        |
| Fe1-S1                | 2.530        | 2.120     | 0.370 | 0.330 |       |                       | 2.149     | 0.370 | 0.357 |       |        |
| Fe1-S2A               | 2.271        | 2.120     | 0.370 | 0.665 |       |                       | 2.149     | 0.370 | 0.719 |       |        |
| Fe1-S3A               | 2.276        | 2.120     | 0.370 | 0.656 |       |                       | 2.149     | 0.370 | 0.709 |       |        |
| Fe1-SG                | 2.097        | 2.120     | 0.370 | 1.064 | 2.715 | 0.715                 | 2.149     | 0.370 | 1.151 | 2.937 | -0.063 |
| Fe2-S1                | 2.268        | 2.120     | 0.370 | 0.670 |       |                       | 2.149     | 0.370 | 0.725 |       |        |
| Fe2-S2A               | 2.192        | 2.120     | 0.370 | 0.823 |       |                       | 2.149     | 0.370 | 0.890 |       |        |
| Fe2-S4A               | 2.244        | 2.120     | 0.370 | 0.715 |       |                       | 2.149     | 0.370 | 0.774 |       |        |
| Fe2-SG                | 2.839        | 2.120     | 0.370 | 0.143 | 2.352 | 0.352                 | 2.149     | 0.370 | 0.155 | 2.544 | -0.456 |
| Fe3-S2A               | 2.330        | 2.120     | 0.370 | 0.567 |       |                       | 2.149     | 0.370 | 0.613 |       |        |
| Fe3-S3A               | 2.296        | 2.120     | 0.370 | 0.621 |       |                       | 2.149     | 0.370 | 0.672 |       |        |
| Fe3-S4A               | 2.259        | 2.120     | 0.370 | 0.687 |       |                       | 2.149     | 0.370 | 0.743 |       |        |
| Fe3-SG                | 2.068        | 2.120     | 0.370 | 1.151 | 3.026 | 1.026                 | 2.149     | 0.370 | 1.245 | 3.273 | 0.273  |
| Fe4-S1                | 2.515        | 2.120     | 0.370 | 0.344 |       |                       | 2.149     | 0.370 | 0.372 |       |        |
| Fe4-S3A               | 2.309        | 2.120     | 0.370 | 0.600 |       |                       | 2.149     | 0.370 | 0.649 |       |        |

|         |       |       |       |       |              |       |       |       |       |        |        |
|---------|-------|-------|-------|-------|--------------|-------|-------|-------|-------|--------|--------|
| Fe4-S4A | 2.238 | 2.120 | 0.370 | 0.727 |              |       | 2.149 | 0.370 | 0.786 |        |        |
| Fe4-SG  | 1.837 | 2.120 | 0.370 | 2.149 | <b>3.819</b> | 1.819 | 2.149 | 0.370 | 2.324 | 4.131  | 1.131  |
| Fe5-S1  | 2.570 | 2.120 | 0.370 | 0.296 |              |       | 2.149 | 0.370 | 0.321 |        |        |
| Fe5-S2B | 2.257 | 2.120 | 0.370 | 0.691 |              |       | 2.149 | 0.370 | 0.747 |        |        |
| Fe5-S4B | 2.303 | 2.120 | 0.370 | 0.610 |              |       | 2.149 | 0.370 | 0.660 |        |        |
| Fe5-SG  | 1.929 | 2.120 | 0.370 | 1.676 | <b>3.272</b> | 1.272 | 2.149 | 0.370 | 1.812 | 3.539  | 0.539  |
| Fe6-S1  | 2.355 | 2.120 | 0.370 | 0.530 |              |       | 2.149 | 0.370 | 0.573 |        |        |
| Fe6-S2B | 2.224 | 2.120 | 0.370 | 0.755 |              |       | 2.149 | 0.370 | 0.817 |        |        |
| Fe6-S3B | 2.168 | 2.120 | 0.370 | 0.878 |              |       | 2.149 | 0.370 | 0.950 |        |        |
| Fe6-SG  | 2.858 | 2.120 | 0.370 | 0.136 | 2.299        | 0.299 | 2.149 | 0.370 | 0.147 | 2.487  | -0.513 |
| Fe7-S2B | 2.312 | 2.120 | 0.370 | 0.595 |              |       | 2.149 | 0.370 | 0.644 |        |        |
| Fe7-S3B | 2.313 | 2.120 | 0.370 | 0.594 |              |       | 2.149 | 0.370 | 0.642 |        |        |
| Fe7-S4B | 2.275 | 2.120 | 0.370 | 0.658 |              |       | 2.149 | 0.370 | 0.711 |        |        |
| Fe7-SG  | 2.744 | 2.120 | 0.370 | 0.185 | 2.032        | 0.032 | 2.149 | 0.370 | 0.200 | 2.197  | -0.803 |
| Fe8-S1  | 2.523 | 2.120 | 0.370 | 0.336 |              |       | 2.149 | 0.370 | 0.364 |        |        |
| Fe8-S3B | 2.251 | 2.120 | 0.370 | 0.702 |              |       | 2.149 | 0.370 | 0.759 |        |        |
| Fe8-S4B | 2.311 | 2.120 | 0.370 | 0.597 |              |       | 2.149 | 0.370 | 0.645 |        |        |
| Fe8-SG  | 1.894 | 2.120 | 0.370 | 1.842 | <b>3.477</b> | 1.477 | 2.149 | 0.370 | 1.992 | 3.761  | 0.761  |
|         |       |       |       |       | 22.993       |       |       |       |       | 24.868 |        |

**Table S12** The abandoned valence analyses for irons in P-cluster [3] from MoFe protein 1M1Y at resolution of 3.2 Å. Faulty data in  $R_0$  (+2) are bold highlighted.

| Bond                  | $r_{ij}$ (Å) | $R_0$ (Å) | B (Å) | Bval  | Sum   | Diff.                 | $R_0$ (Å) | B (Å) | Bval  | Sum   | Diff.  |
|-----------------------|--------------|-----------|-------|-------|-------|-----------------------|-----------|-------|-------|-------|--------|
| expected valence = +2 |              |           |       |       |       | expected valence = +3 |           |       |       |       |        |
| Fe1-S1                | 2.470        | 2.120     | 0.370 | 0.388 |       |                       | 2.149     | 0.370 | 0.420 |       |        |
| Fe1-S2A               | 2.258        | 2.120     | 0.370 | 0.689 |       |                       | 2.149     | 0.370 | 0.745 |       |        |
| Fe1-S3A               | 2.329        | 2.120     | 0.370 | 0.568 |       |                       | 2.149     | 0.370 | 0.615 |       |        |
| Fe1-SG                | 1.987        | 2.120     | 0.370 | 1.433 | 3.078 | 1.078                 | 2.149     | 0.370 | 1.549 | 3.329 | 0.329  |
| Fe2-S1                | 2.307        | 2.120     | 0.370 | 0.603 |       |                       | 2.149     | 0.370 | 0.652 |       |        |
| Fe2-S2A               | 2.152        | 2.120     | 0.370 | 0.917 |       |                       | 2.149     | 0.370 | 0.992 |       |        |
| Fe2-S4A               | 2.158        | 2.120     | 0.370 | 0.902 |       |                       | 2.149     | 0.370 | 0.976 |       |        |
| Fe2-SG                | 2.856        | 2.120     | 0.370 | 0.137 | 2.560 | 0.560                 | 2.149     | 0.370 | 0.148 | 2.768 | -0.232 |
| Fe3-S2A               | 2.281        | 2.120     | 0.370 | 0.647 |       |                       | 2.149     | 0.370 | 0.700 |       |        |
| Fe3-S3A               | 2.211        | 2.120     | 0.370 | 0.782 |       |                       | 2.149     | 0.370 | 0.846 |       |        |
| Fe3-S4A               | 2.228        | 2.120     | 0.370 | 0.747 |       |                       | 2.149     | 0.370 | 0.808 |       |        |
| Fe3-SG                | 2.150        | 2.120     | 0.370 | 0.922 | 3.098 | 1.098                 | 2.149     | 0.370 | 0.997 | 3.351 | 0.351  |
| Fe4-S1                | 2.454        | 2.120     | 0.370 | 0.405 |       |                       | 2.149     | 0.370 | 0.439 |       |        |
| Fe4-S3A               | 2.221        | 2.120     | 0.370 | 0.761 |       |                       | 2.149     | 0.370 | 0.823 |       |        |



|         |       |       |       |       |        |       |       |       |       |        |        |
|---------|-------|-------|-------|-------|--------|-------|-------|-------|-------|--------|--------|
| Fe4-S4A | 2.264 | 2.120 | 0.370 | 0.678 |        |       | 2.149 | 0.370 | 0.733 |        |        |
| Fe4-SG  | 1.635 | 2.120 | 0.370 | 3.709 | 5.553  | 3.553 | 2.149 | 0.370 | 4.012 | 6.006  | 3.006  |
| Fe5-S1  | 2.549 | 2.120 | 0.370 | 0.314 |        |       | 2.149 | 0.370 | 0.339 |        |        |
| Fe5-S2B | 2.267 | 2.120 | 0.370 | 0.672 |        |       | 2.149 | 0.370 | 0.727 |        |        |
| Fe5-S4B | 2.317 | 2.120 | 0.370 | 0.587 |        |       | 2.149 | 0.370 | 0.635 |        |        |
| Fe5-SG  | 1.727 | 2.120 | 0.370 | 2.893 | 4.466  | 2.466 | 2.149 | 0.370 | 3.128 | 4.830  | 1.830  |
| Fe6-S1  | 2.338 | 2.120 | 0.370 | 0.555 |        |       | 2.149 | 0.370 | 0.600 |        |        |
| Fe6-S2B | 2.200 | 2.120 | 0.370 | 0.806 |        |       | 2.149 | 0.370 | 0.871 |        |        |
| Fe6-S3B | 2.176 | 2.120 | 0.370 | 0.860 |        |       | 2.149 | 0.370 | 0.930 |        |        |
| Fe6-SG  | 2.613 | 2.120 | 0.370 | 0.264 | 2.484  | 0.484 | 2.149 | 0.370 | 0.285 | 2.686  | -0.314 |
| Fe7-S2B | 2.244 | 2.120 | 0.370 | 0.715 |        |       | 2.149 | 0.370 | 0.774 |        |        |
| Fe7-S3B | 2.285 | 2.120 | 0.370 | 0.640 |        |       | 2.149 | 0.370 | 0.692 |        |        |
| Fe7-S4B | 2.268 | 2.120 | 0.370 | 0.670 |        |       | 2.149 | 0.370 | 0.725 |        |        |
| Fe7-SG  | 2.483 | 2.120 | 0.370 | 0.375 | 2.401  | 0.401 | 2.149 | 0.370 | 0.405 | 2.596  | -0.404 |
| Fe8-S1  | 2.462 | 2.120 | 0.370 | 0.397 |        |       | 2.149 | 0.370 | 0.429 |        |        |
| Fe8-S3B | 2.267 | 2.120 | 0.370 | 0.672 |        |       | 2.149 | 0.370 | 0.727 |        |        |
| Fe8-S4B | 2.349 | 2.120 | 0.370 | 0.539 |        |       | 2.149 | 0.370 | 0.582 |        |        |
| Fe8-SG  | 1.906 | 2.120 | 0.370 | 1.783 | 3.391  | 1.391 | 2.149 | 0.370 | 1.929 | 3.667  | 0.667  |
|         |       |       |       |       | 27.030 |       |       |       |       | 29.233 |        |

**Table S13** The abandoned valence analyses for irons in P-cluster [4] from MoFe protein 1M1Y at resolution of 3.2 Å. Faulty data in  $R_0$  (+2) are bold highlighted.

| Bond                  | $r_{ij}$ (Å) | $R_0$ (Å) | B (Å) | Bval  | Sum   | Diff.                 | $R_0$ (Å) | B (Å) | Bval  | Sum   | Diff.  |
|-----------------------|--------------|-----------|-------|-------|-------|-----------------------|-----------|-------|-------|-------|--------|
| expected valence = +2 |              |           |       |       |       | expected valence = +3 |           |       |       |       |        |
| Fe1-S1                | 2.490        | 2.120     | 0.370 | 0.368 |       |                       | 2.149     | 0.370 | 0.398 |       |        |
| Fe1-S2A               | 2.260        | 2.120     | 0.370 | 0.685 |       |                       | 2.149     | 0.370 | 0.741 |       |        |
| Fe1-S3A               | 2.218        | 2.120     | 0.370 | 0.767 |       |                       | 2.149     | 0.370 | 0.830 |       |        |
| Fe1-SG                | 2.030        | 2.120     | 0.370 | 1.275 | 3.096 | 1.096                 | 2.149     | 0.370 | 1.379 | 3.348 | 0.348  |
| Fe2-S1                | 2.279        | 2.120     | 0.370 | 0.651 |       |                       | 2.149     | 0.370 | 0.704 |       |        |
| Fe2-S2A               | 2.167        | 2.120     | 0.370 | 0.881 |       |                       | 2.149     | 0.370 | 0.953 |       |        |
| Fe2-S4A               | 2.278        | 2.120     | 0.370 | 0.652 |       |                       | 2.149     | 0.370 | 0.706 |       |        |
| Fe2-SG                | 2.868        | 2.120     | 0.370 | 0.132 | 2.316 | 0.316                 | 2.149     | 0.370 | 0.143 | 2.505 | -0.495 |
| Fe3-S2A               | 2.370        | 2.120     | 0.370 | 0.509 |       |                       | 2.149     | 0.370 | 0.550 |       |        |
| Fe3-S3A               | 2.304        | 2.120     | 0.370 | 0.608 |       |                       | 2.149     | 0.370 | 0.658 |       |        |
| Fe3-S4A               | 2.258        | 2.120     | 0.370 | 0.689 |       |                       | 2.149     | 0.370 | 0.745 |       |        |
| Fe3-SG                | 2.134        | 2.120     | 0.370 | 0.963 | 2.769 | 0.769                 | 2.149     | 0.370 | 1.041 | 2.994 | -0.006 |
| Fe4-S1                | 2.456        | 2.120     | 0.370 | 0.403 |       |                       | 2.149     | 0.370 | 0.436 |       |        |
| Fe4-S3A               | 2.333        | 2.120     | 0.370 | 0.562 |       |                       | 2.149     | 0.370 | 0.608 |       |        |

|         |       |       |       |       |              |        |       |       |       |        |        |
|---------|-------|-------|-------|-------|--------------|--------|-------|-------|-------|--------|--------|
| Fe4-S4A | 2.323 | 2.120 | 0.370 | 0.578 |              |        | 2.149 | 0.370 | 0.625 |        |        |
| Fe4-SG  | 1.906 | 2.120 | 0.370 | 1.783 | <b>3.326</b> | 1.326  | 2.149 | 0.370 | 1.929 | 3.598  | 0.598  |
| Fe5-S1  | 2.543 | 2.120 | 0.370 | 0.319 |              |        | 2.149 | 0.370 | 0.345 |        |        |
| Fe5-S2B | 2.266 | 2.120 | 0.370 | 0.674 |              |        | 2.149 | 0.370 | 0.729 |        |        |
| Fe5-S4B | 2.316 | 2.120 | 0.370 | 0.589 |              |        | 2.149 | 0.370 | 0.637 |        |        |
| Fe5-SG  | 1.943 | 2.120 | 0.370 | 1.613 | <b>3.195</b> | 1.195  | 2.149 | 0.370 | 1.745 | 3.455  | 0.455  |
| Fe6-S1  | 2.289 | 2.120 | 0.370 | 0.633 |              |        | 2.149 | 0.370 | 0.685 |        |        |
| Fe6-S2B | 2.230 | 2.120 | 0.370 | 0.743 |              |        | 2.149 | 0.370 | 0.803 |        |        |
| Fe6-S3B | 2.236 | 2.120 | 0.370 | 0.731 |              |        | 2.149 | 0.370 | 0.790 |        |        |
| Fe6-SG  | 2.705 | 2.120 | 0.370 | 0.206 | 2.313        | 0.313  | 2.149 | 0.370 | 0.223 | 2.501  | -0.499 |
| Fe7-S2B | 2.312 | 2.120 | 0.370 | 0.595 |              |        | 2.149 | 0.370 | 0.644 |        |        |
| Fe7-S3B | 2.351 | 2.120 | 0.370 | 0.536 |              |        | 2.149 | 0.370 | 0.579 |        |        |
| Fe7-S4B | 2.326 | 2.120 | 0.370 | 0.573 |              |        | 2.149 | 0.370 | 0.620 |        |        |
| Fe7-SG  | 2.579 | 2.120 | 0.370 | 0.289 | 1.993        | -0.007 | 2.149 | 0.370 | 0.313 | 2.156  | -0.844 |
| Fe8-S1  | 2.458 | 2.120 | 0.370 | 0.401 |              |        | 2.149 | 0.370 | 0.434 |        |        |
| Fe8-S3B | 2.293 | 2.120 | 0.370 | 0.627 |              |        | 2.149 | 0.370 | 0.678 |        |        |
| Fe8-S4B | 2.331 | 2.120 | 0.370 | 0.565 |              |        | 2.149 | 0.370 | 0.611 |        |        |
| Fe8-SG  | 2.043 | 2.120 | 0.370 | 1.231 | 2.824        | 0.824  | 2.149 | 0.370 | 1.332 | 3.055  | 0.055  |
|         |       |       |       |       | 21.832       |        |       |       |       | 23.612 |        |

**Table S14** The abandoned valence analyses for irons in P-cluster [1] from MoFe protein 2AFI at resolution of 3.1 Å. Faulty data in  $R_0$  (+2) are bold highlighted.

| Bond                  | $r_{ij}$ (Å) | $R_0$ (Å) | B (Å) | Bval  | Sum   | Diff.                 | $R_0$ (Å) | B (Å) | Bval  | Sum   | Diff.  |
|-----------------------|--------------|-----------|-------|-------|-------|-----------------------|-----------|-------|-------|-------|--------|
| expected valence = +2 |              |           |       |       |       | expected valence = +3 |           |       |       |       |        |
| Fe1-S1                | 2.227        | 2.12      | 0.37  | 0.749 |       |                       | 2.149     | 0.37  | 0.810 |       |        |
| Fe1-S2A               | 2.215        | 2.12      | 0.37  | 0.774 |       |                       | 2.149     | 0.37  | 0.837 |       |        |
| Fe1-S3A               | 2.234        | 2.12      | 0.37  | 0.735 |       |                       | 2.149     | 0.37  | 0.795 |       |        |
| Fe1-SG                | 2.248        | 2.12      | 0.37  | 0.708 | 2.965 | 0.965                 | 2.149     | 0.37  | 0.765 | 3.207 | 0.207  |
| Fe2-S1                | 2.495        | 2.12      | 0.37  | 0.363 |       |                       | 2.149     | 0.37  | 0.393 |       |        |
| Fe2-S2A               | 2.281        | 2.12      | 0.37  | 0.647 |       |                       | 2.149     | 0.37  | 0.700 |       |        |
| Fe2-S4A               | 2.251        | 2.12      | 0.37  | 0.702 |       |                       | 2.149     | 0.37  | 0.759 |       |        |
| Fe2-SG                | 2.305        | 2.12      | 0.37  | 0.607 | 2.318 | 0.318                 | 2.149     | 0.37  | 0.656 | 2.508 | -0.492 |
| Fe3-S2A               | 2.195        | 2.12      | 0.37  | 0.817 |       |                       | 2.149     | 0.37  | 0.883 |       |        |
| Fe3-S3A               | 2.221        | 2.12      | 0.37  | 0.761 |       |                       | 2.149     | 0.37  | 0.823 |       |        |
| Fe3-S4A               | 2.240        | 2.12      | 0.37  | 0.723 |       |                       | 2.149     | 0.37  | 0.782 |       |        |
| Fe3-SG                | 2.271        | 2.12      | 0.37  | 0.665 | 2.966 | 0.966                 | 2.149     | 0.37  | 0.719 | 3.207 | 0.207  |
| Fe4-S1                | 2.071        | 2.12      | 0.37  | 1.142 |       |                       | 2.149     | 0.37  | 1.235 |       |        |
| Fe4-S3A               | 2.226        | 2.12      | 0.37  | 0.751 |       |                       | 2.149     | 0.37  | 0.812 |       |        |

|         |       |      |      |       |              |       |       |      |       |        |        |
|---------|-------|------|------|-------|--------------|-------|-------|------|-------|--------|--------|
| Fe4-S4A | 2.199 | 2.12 | 0.37 | 0.808 |              |       | 2.149 | 0.37 | 0.874 |        |        |
| Fe4-SG  | 2.198 | 2.12 | 0.37 | 0.810 | <b>3.510</b> | 1.510 | 2.149 | 0.37 | 0.876 | 3.796  | 0.796  |
| Fe5-S1  | 2.079 | 2.12 | 0.37 | 1.117 |              |       | 2.149 | 0.37 | 1.208 |        |        |
| Fe5-S2B | 2.221 | 2.12 | 0.37 | 0.761 |              |       | 2.149 | 0.37 | 0.823 |        |        |
| Fe5-S4B | 2.257 | 2.12 | 0.37 | 0.691 |              |       | 2.149 | 0.37 | 0.747 |        |        |
| Fe5-SG  | 2.276 | 2.12 | 0.37 | 0.656 | <b>3.225</b> | 1.225 | 2.149 | 0.37 | 0.709 | 3.488  | 0.488  |
| Fe6-S1  | 2.480 | 2.12 | 0.37 | 0.378 |              |       | 2.149 | 0.37 | 0.409 |        |        |
| Fe6-S2B | 2.300 | 2.12 | 0.37 | 0.615 |              |       | 2.149 | 0.37 | 0.665 |        |        |
| Fe6-S3B | 2.257 | 2.12 | 0.37 | 0.691 |              |       | 2.149 | 0.37 | 0.747 |        |        |
| Fe6-SG  | 2.226 | 2.12 | 0.37 | 0.751 | 2.434        | 0.434 | 2.149 | 0.37 | 0.812 | 2.633  | -0.367 |
| Fe7-S2B | 2.262 | 2.12 | 0.37 | 0.681 |              |       | 2.149 | 0.37 | 0.737 |        |        |
| Fe7-S3B | 2.223 | 2.12 | 0.37 | 0.757 |              |       | 2.149 | 0.37 | 0.819 |        |        |
| Fe7-S4B | 2.244 | 2.12 | 0.37 | 0.715 |              |       | 2.149 | 0.37 | 0.774 |        |        |
| Fe7-SG  | 2.306 | 2.12 | 0.37 | 0.605 | 2.758        | 0.758 | 2.149 | 0.37 | 0.654 | 2.983  | -0.017 |
| Fe8-S1  | 2.202 | 2.12 | 0.37 | 0.801 |              |       | 2.149 | 0.37 | 0.867 |        |        |
| Fe8-S3B | 2.202 | 2.12 | 0.37 | 0.801 |              |       | 2.149 | 0.37 | 0.867 |        |        |
| Fe8-S4B | 2.226 | 2.12 | 0.37 | 0.751 |              |       | 2.149 | 0.37 | 0.812 |        |        |
| Fe8-SG  | 2.143 | 2.12 | 0.37 | 0.940 | <b>3.293</b> | 1.293 | 2.149 | 0.37 | 1.016 | 3.562  | 0.562  |
|         |       |      |      |       | 23.470       |       |       |      |       | 25.383 |        |

---

**Table S15** The abandoned valence analyses for irons in P-cluster [2] from MoFe protein 2AFI at resolution of 3.1 Å. Faulty data in  $R_0$  (+2) are bold highlighted.

| Bond                  | $r_{ij}$ (Å) | $R_0$ (Å) | B (Å) | Bval  | Sum   | Diff.                 | $R_0$ (Å) | B (Å) | Bval  | Sum   | Diff.  |
|-----------------------|--------------|-----------|-------|-------|-------|-----------------------|-----------|-------|-------|-------|--------|
| expected valence = +2 |              |           |       |       |       | expected valence = +3 |           |       |       |       |        |
| Fe1-S1                | 2.228        | 2.12      | 0.37  | 0.747 |       |                       | 2.149     | 0.37  | 0.808 |       |        |
| Fe1-S2A               | 2.197        | 2.12      | 0.37  | 0.812 |       |                       | 2.149     | 0.37  | 0.878 |       |        |
| Fe1-S3A               | 2.221        | 2.12      | 0.37  | 0.761 |       |                       | 2.149     | 0.37  | 0.823 |       |        |
| Fe1-SG                | 2.245        | 2.12      | 0.37  | 0.713 | 3.033 | 1.033                 | 2.149     | 0.37  | 0.771 | 3.281 | 0.281  |
| Fe2-S1                | 2.527        | 2.12      | 0.37  | 0.333 |       |                       | 2.149     | 0.37  | 0.360 |       |        |
| Fe2-S2A               | 2.264        | 2.12      | 0.37  | 0.678 |       |                       | 2.149     | 0.37  | 0.733 |       |        |
| Fe2-S4A               | 2.263        | 2.12      | 0.37  | 0.679 |       |                       | 2.149     | 0.37  | 0.735 |       |        |
| Fe2-SG                | 2.269        | 2.12      | 0.37  | 0.669 | 2.358 | 0.358                 | 2.149     | 0.37  | 0.723 | 2.551 | -0.449 |
| Fe3-S2A               | 2.189        | 2.12      | 0.37  | 0.830 |       |                       | 2.149     | 0.37  | 0.898 |       |        |
| Fe3-S3A               | 2.226        | 2.12      | 0.37  | 0.751 |       |                       | 2.149     | 0.37  | 0.812 |       |        |
| Fe3-S4A               | 2.216        | 2.12      | 0.37  | 0.771 |       |                       | 2.149     | 0.37  | 0.834 |       |        |
| Fe3-SG                | 2.279        | 2.12      | 0.37  | 0.651 | 3.003 | 1.003                 | 2.149     | 0.37  | 0.704 | 3.248 | 0.248  |
| Fe4-S1                | 2.120        | 2.12      | 0.37  | 1.000 |       |                       | 2.149     | 0.37  | 1.082 |       |        |
| Fe4-S3A               | 2.249        | 2.12      | 0.37  | 0.706 |       |                       | 2.149     | 0.37  | 0.763 |       |        |

|         |       |      |      |       |              |       |       |      |       |        |        |
|---------|-------|------|------|-------|--------------|-------|-------|------|-------|--------|--------|
| Fe4-S4A | 2.197 | 2.12 | 0.37 | 0.812 |              |       | 2.149 | 0.37 | 0.878 |        |        |
| Fe4-SG  | 2.195 | 2.12 | 0.37 | 0.817 | <b>3.334</b> | 1.334 | 2.149 | 0.37 | 0.883 | 3.606  | 0.606  |
| Fe5-S1  | 2.099 | 2.12 | 0.37 | 1.058 |              |       | 2.149 | 0.37 | 1.145 |        |        |
| Fe5-S2B | 2.229 | 2.12 | 0.37 | 0.745 |              |       | 2.149 | 0.37 | 0.806 |        |        |
| Fe5-S4B | 2.239 | 2.12 | 0.37 | 0.725 |              |       | 2.149 | 0.37 | 0.784 |        |        |
| Fe5-SG  | 2.279 | 2.12 | 0.37 | 0.651 | <b>3.179</b> | 1.179 | 2.149 | 0.37 | 0.704 | 3.438  | 0.438  |
| Fe6-S1  | 2.530 | 2.12 | 0.37 | 0.330 |              |       | 2.149 | 0.37 | 0.357 |        |        |
| Fe6-S2B | 2.247 | 2.12 | 0.37 | 0.709 |              |       | 2.149 | 0.37 | 0.767 |        |        |
| Fe6-S3B | 2.222 | 2.12 | 0.37 | 0.759 |              |       | 2.149 | 0.37 | 0.821 |        |        |
| Fe6-SG  | 2.262 | 2.12 | 0.37 | 0.681 | 2.480        | 0.480 | 2.149 | 0.37 | 0.737 | 2.682  | -0.318 |
| Fe7-S2B | 2.232 | 2.12 | 0.37 | 0.739 |              |       | 2.149 | 0.37 | 0.799 |        |        |
| Fe7-S3B | 2.207 | 2.12 | 0.37 | 0.790 |              |       | 2.149 | 0.37 | 0.855 |        |        |
| Fe7-S4B | 2.251 | 2.12 | 0.37 | 0.702 |              |       | 2.149 | 0.37 | 0.759 |        |        |
| Fe7-SG  | 2.316 | 2.12 | 0.37 | 0.589 | 2.820        | 0.820 | 2.149 | 0.37 | 0.637 | 3.050  | 0.050  |
| Fe8-S1  | 2.102 | 2.12 | 0.37 | 1.050 |              |       | 2.149 | 0.37 | 1.135 |        |        |
| Fe8-S3B | 2.207 | 2.12 | 0.37 | 0.790 |              |       | 2.149 | 0.37 | 0.855 |        |        |
| Fe8-S4B | 2.237 | 2.12 | 0.37 | 0.729 |              |       | 2.149 | 0.37 | 0.788 |        |        |
| Fe8-SG  | 2.224 | 2.12 | 0.37 | 0.755 | <b>3.324</b> | 1.324 | 2.149 | 0.37 | 0.817 | 3.595  | 0.595  |
|         |       |      |      |       | 23.532       |       |       |      |       | 25.451 |        |

---

**Table S16** The abandoned valence analyses for irons in P-cluster [3] from MoFe protein 2AFI at resolution of 3.1 Å. Faulty data in  $R_0$  (+2) are bold highlighted.

| Bond                  | $r_{ij}$ (Å) | $R_0$ (Å) | B (Å) | Bval  | Sum          | Diff.                 | $R_0$ (Å) | B (Å) | Bval  | Sum   | Diff.  |
|-----------------------|--------------|-----------|-------|-------|--------------|-----------------------|-----------|-------|-------|-------|--------|
| expected valence = +2 |              |           |       |       |              | expected valence = +3 |           |       |       |       |        |
| Fe1-S1                | 2.159        | 2.12      | 0.37  | 0.900 |              |                       | 2.149     | 0.37  | 0.973 |       |        |
| Fe1-S2A               | 2.212        | 2.12      | 0.37  | 0.780 |              |                       | 2.149     | 0.37  | 0.843 |       |        |
| Fe1-S3A               | 2.200        | 2.12      | 0.37  | 0.806 |              |                       | 2.149     | 0.37  | 0.871 |       |        |
| Fe1-SG                | 2.157        | 2.12      | 0.37  | 0.905 | <b>3.390</b> | 1.390                 | 2.149     | 0.37  | 0.979 | 3.667 | 0.667  |
| Fe1-S1                | 2.504        | 2.12      | 0.37  | 0.354 |              |                       | 2.149     | 0.37  | 0.383 |       |        |
| Fe1-S2A               | 2.227        | 2.12      | 0.37  | 0.749 |              |                       | 2.149     | 0.37  | 0.810 |       |        |
| Fe1-S3A               | 2.244        | 2.12      | 0.37  | 0.715 |              |                       | 2.149     | 0.37  | 0.774 |       |        |
| Fe1-SG                | 2.253        | 2.12      | 0.37  | 0.698 | 2.516        | 0.516                 | 2.149     | 0.37  | 0.755 | 2.722 | -0.278 |
| Fe1-S1                | 2.234        | 2.12      | 0.37  | 0.735 |              |                       | 2.149     | 0.37  | 0.795 |       |        |
| Fe1-S2A               | 2.217        | 2.12      | 0.37  | 0.769 |              |                       | 2.149     | 0.37  | 0.832 |       |        |
| Fe1-S3A               | 2.201        | 2.12      | 0.37  | 0.803 |              |                       | 2.149     | 0.37  | 0.869 |       |        |
| Fe1-SG                | 2.291        | 2.12      | 0.37  | 0.630 | 2.938        | 0.938                 | 2.149     | 0.37  | 0.681 | 3.177 | 0.177  |
| Fe1-S1                | 2.037        | 2.12      | 0.37  | 1.251 |              |                       | 2.149     | 0.37  | 1.354 |       |        |
| Fe1-S2A               | 2.209        | 2.12      | 0.37  | 0.786 |              |                       | 2.149     | 0.37  | 0.850 |       |        |



|         |       |      |      |       |               |       |       |      |       |        |        |
|---------|-------|------|------|-------|---------------|-------|-------|------|-------|--------|--------|
| Fel-S3A | 2.192 | 2.12 | 0.37 | 0.823 |               |       | 2.149 | 0.37 | 0.890 |        |        |
| Fel-SG  | 2.173 | 2.12 | 0.37 | 0.867 | <b>3.727</b>  | 1.727 | 2.149 | 0.37 | 0.937 | 4.031  | 1.031  |
| Fel-S1  | 2.098 | 2.12 | 0.37 | 1.061 |               |       | 2.149 | 0.37 | 1.148 |        |        |
| Fel-S2A | 2.201 | 2.12 | 0.37 | 0.803 |               |       | 2.149 | 0.37 | 0.869 |        |        |
| Fel-S3A | 2.294 | 2.12 | 0.37 | 0.625 |               |       | 2.149 | 0.37 | 0.676 |        |        |
| Fel-SG  | 2.241 | 2.12 | 0.37 | 0.721 | <b>3.211</b>  | 1.211 | 2.149 | 0.37 | 0.780 | 3.472  | 0.472  |
| Fel-S1  | 2.476 | 2.12 | 0.37 | 0.382 |               |       | 2.149 | 0.37 | 0.413 |        |        |
| Fel-S2A | 2.277 | 2.12 | 0.37 | 0.654 |               |       | 2.149 | 0.37 | 0.708 |        |        |
| Fel-S3A | 2.251 | 2.12 | 0.37 | 0.702 |               |       | 2.149 | 0.37 | 0.759 |        |        |
| Fel-SG  | 2.223 | 2.12 | 0.37 | 0.757 | 2.495         | 0.495 | 2.149 | 0.37 | 0.819 | 2.699  | -0.301 |
| Fel-S1  | 2.227 | 2.12 | 0.37 | 0.749 |               |       | 2.149 | 0.37 | 0.810 |        |        |
| Fel-S2A | 2.211 | 2.12 | 0.37 | 0.782 |               |       | 2.149 | 0.37 | 0.846 |        |        |
| Fel-S3A | 2.239 | 2.12 | 0.37 | 0.725 |               |       | 2.149 | 0.37 | 0.784 |        |        |
| Fel-SG  | 2.326 | 2.12 | 0.37 | 0.573 | 2.829         | 0.829 | 2.149 | 0.37 | 0.620 | 3.060  | 0.060  |
| Fel-S1  | 2.153 | 2.12 | 0.37 | 0.915 |               |       | 2.149 | 0.37 | 0.989 |        |        |
| Fel-S2A | 2.190 | 2.12 | 0.37 | 0.828 |               |       | 2.149 | 0.37 | 0.895 |        |        |
| Fel-S3A | 2.233 | 2.12 | 0.37 | 0.737 |               |       | 2.149 | 0.37 | 0.797 |        |        |
| Fel-SG  | 2.166 | 2.12 | 0.37 | 0.883 | <b>3.362</b>  | 1.362 | 2.149 | 0.37 | 0.955 | 3.636  | 0.636  |
| Fel-S1  |       |      |      |       | <b>24.468</b> |       |       |      |       | 26.463 |        |

---

**Table S17** The abandoned valence analyses for irons in P-cluster [4] from MoFe protein 2AFI at resolution of 3.1 Å. Faulty data in  $R_0$  (+2) are bold highlighted.

| Bond                  | $r_{ij}$ (Å) | $R_0$ (Å) | B (Å) | Bval  | Sum          | Diff.                 | $R_0$ (Å) | B (Å) | Bval  | Sum   | Diff.  |
|-----------------------|--------------|-----------|-------|-------|--------------|-----------------------|-----------|-------|-------|-------|--------|
| expected valence = +2 |              |           |       |       |              | expected valence = +3 |           |       |       |       |        |
| Fe1-S1                | 2.162        | 2.120     | 0.370 | 0.893 |              |                       | 2.149     | 0.370 | 0.965 |       |        |
| Fe1-S2A               | 2.224        | 2.120     | 0.370 | 0.755 |              |                       | 2.149     | 0.370 | 0.817 |       |        |
| Fe1-S3A               | 2.226        | 2.120     | 0.370 | 0.751 |              |                       | 2.149     | 0.370 | 0.812 |       |        |
| Fe1-SG                | 2.191        | 2.120     | 0.370 | 0.825 | <b>3.224</b> | 1.224                 | 2.149     | 0.370 | 0.893 | 3.487 | 0.487  |
| Fe2-S1                | 2.510        | 2.120     | 0.370 | 0.349 |              |                       | 2.149     | 0.370 | 0.377 |       |        |
| Fe2-S2A               | 2.287        | 2.120     | 0.370 | 0.637 |              |                       | 2.149     | 0.370 | 0.689 |       |        |
| Fe2-S4A               | 2.293        | 2.120     | 0.370 | 0.627 |              |                       | 2.149     | 0.370 | 0.678 |       |        |
| Fe2-SG                | 2.288        | 2.120     | 0.370 | 0.635 | 2.247        | 0.247                 | 2.149     | 0.370 | 0.687 | 2.430 | -0.570 |
| Fe3-S2A               | 2.229        | 2.120     | 0.370 | 0.745 |              |                       | 2.149     | 0.370 | 0.806 |       |        |
| Fe3-S3A               | 2.188        | 2.120     | 0.370 | 0.832 |              |                       | 2.149     | 0.370 | 0.900 |       |        |
| Fe3-S4A               | 2.222        | 2.120     | 0.370 | 0.759 |              |                       | 2.149     | 0.370 | 0.821 |       |        |
| Fe3-SG                | 2.277        | 2.120     | 0.370 | 0.654 | 2.990        | 0.990                 | 2.149     | 0.370 | 0.708 | 3.234 | 0.234  |
| Fe4-S1                | 2.102        | 2.120     | 0.370 | 1.050 |              |                       | 2.149     | 0.370 | 1.135 |       |        |
| Fe4-S3A               | 2.246        | 2.120     | 0.370 | 0.711 |              |                       | 2.149     | 0.370 | 0.769 |       |        |

|         |       |       |       |       |              |       |       |       |       |        |        |
|---------|-------|-------|-------|-------|--------------|-------|-------|-------|-------|--------|--------|
| Fe4-S4A | 2.175 | 2.120 | 0.370 | 0.862 |              |       | 2.149 | 0.370 | 0.932 |        |        |
| Fe4-SG  | 2.223 | 2.120 | 0.370 | 0.757 | <b>3.380</b> | 1.380 | 2.149 | 0.370 | 0.819 | 3.656  | 0.656  |
| Fe5-S1  | 2.112 | 2.120 | 0.370 | 1.022 |              |       | 2.149 | 0.370 | 1.105 |        |        |
| Fe5-S2B | 2.231 | 2.120 | 0.370 | 0.741 |              |       | 2.149 | 0.370 | 0.801 |        |        |
| Fe5-S4B | 2.264 | 2.120 | 0.370 | 0.678 |              |       | 2.149 | 0.370 | 0.733 |        |        |
| Fe5-SG  | 2.253 | 2.120 | 0.370 | 0.698 | 3.138        | 1.138 | 2.149 | 0.370 | 0.755 | 3.394  | 0.394  |
| Fe6-S1  | 2.538 | 2.120 | 0.370 | 0.323 |              |       | 2.149 | 0.370 | 0.349 |        |        |
| Fe6-S2B | 2.277 | 2.120 | 0.370 | 0.654 |              |       | 2.149 | 0.370 | 0.708 |        |        |
| Fe6-S3B | 2.247 | 2.120 | 0.370 | 0.709 |              |       | 2.149 | 0.370 | 0.767 |        |        |
| Fe6-SG  | 2.264 | 2.120 | 0.370 | 0.678 | 2.364        | 0.364 | 2.149 | 0.370 | 0.733 | 2.557  | -0.443 |
| Fe7-S2B | 2.235 | 2.120 | 0.370 | 0.733 |              |       | 2.149 | 0.370 | 0.793 |        |        |
| Fe7-S3B | 2.242 | 2.120 | 0.370 | 0.719 |              |       | 2.149 | 0.370 | 0.778 |        |        |
| Fe7-S4B | 2.210 | 2.120 | 0.370 | 0.784 |              |       | 2.149 | 0.370 | 0.848 |        |        |
| Fe7-SG  | 2.319 | 2.120 | 0.370 | 0.584 | 2.820        | 0.820 | 2.149 | 0.370 | 0.632 | 3.050  | 0.050  |
| Fe8-S1  | 2.129 | 2.120 | 0.370 | 0.976 |              |       | 2.149 | 0.370 | 1.056 |        |        |
| Fe8-S3B | 2.197 | 2.120 | 0.370 | 0.812 |              |       | 2.149 | 0.370 | 0.878 |        |        |
| Fe8-S4B | 2.252 | 2.120 | 0.370 | 0.700 |              |       | 2.149 | 0.370 | 0.757 |        |        |
| Fe8-SG  | 2.197 | 2.120 | 0.370 | 0.812 | <b>3.300</b> | 1.300 | 2.149 | 0.370 | 0.878 | 3.569  | 0.569  |
|         |       |       |       |       | 23.464       |       |       |       |       | 25.377 |        |

**Table S18** The abandoned valence analyses for irons in P-cluster [1] from MoFe protein 6BBL whose conformations resemble P<sup>N</sup> but overall bond distance are on small side at 1.68 Å resolution.

| Bond                  | $r_{ij}$ (Å) | $R_0$ (Å) | B (Å) | Bval  | Sum   | Diff.                 | $R_0$ (Å) | B (Å) | Bval  | Sum   | Diff.  |
|-----------------------|--------------|-----------|-------|-------|-------|-----------------------|-----------|-------|-------|-------|--------|
| expected valence = +2 |              |           |       |       |       | expected valence = +3 |           |       |       |       |        |
| Fe1-S1                | 2.282        | 2.120     | 0.370 | 0.645 |       |                       | 2.149     | 0.370 | 0.698 |       |        |
| Fe1-S2A               | 2.167        | 2.120     | 0.370 | 0.881 |       |                       | 2.149     | 0.370 | 0.953 |       |        |
| Fe1-S3A               | 2.135        | 2.120     | 0.370 | 0.960 |       |                       | 2.149     | 0.370 | 1.039 |       |        |
| Fe1-SG                | 2.495        | 2.120     | 0.370 | 0.363 | 2.849 | 0.849                 | 2.149     | 0.370 | 0.393 | 3.082 | 0.082  |
| Fe2-S1                | 2.392        | 2.120     | 0.370 | 0.479 |       |                       | 2.149     | 0.370 | 0.519 |       |        |
| Fe2-S2A               | 2.185        | 2.120     | 0.370 | 0.839 |       |                       | 2.149     | 0.370 | 0.907 |       |        |
| Fe2-S4A               | 2.165        | 2.120     | 0.370 | 0.885 |       |                       | 2.149     | 0.370 | 0.958 |       |        |
| Fe2-SG                | 2.472        | 2.120     | 0.370 | 0.386 | 2.590 | 0.590                 | 2.149     | 0.370 | 0.418 | 2.801 | -0.199 |
| Fe3-S2A               | 2.183        | 2.120     | 0.370 | 0.843 |       |                       | 2.149     | 0.370 | 0.912 |       |        |
| Fe3-S3A               | 2.168        | 2.120     | 0.370 | 0.878 |       |                       | 2.149     | 0.370 | 0.950 |       |        |
| Fe3-S4A               | 2.185        | 2.120     | 0.370 | 0.839 |       |                       | 2.149     | 0.370 | 0.907 |       |        |
| Fe3-SG                | 2.456        | 2.120     | 0.370 | 0.403 | 2.964 | 0.964                 | 2.149     | 0.370 | 0.436 | 3.206 | 0.206  |
| Fe4-S1                | 2.321        | 2.120     | 0.370 | 0.581 |       |                       | 2.149     | 0.370 | 0.628 |       |        |
| Fe4-S3A               | 2.160        | 2.120     | 0.370 | 0.898 |       |                       | 2.149     | 0.370 | 0.971 |       |        |

|         |       |       |       |       |        |       |       |       |       |        |        |
|---------|-------|-------|-------|-------|--------|-------|-------|-------|-------|--------|--------|
| Fe4-S4A | 2.178 | 2.120 | 0.370 | 0.855 |        |       | 2.149 | 0.370 | 0.925 |        |        |
| Fe4-SG  | 2.429 | 2.120 | 0.370 | 0.434 | 2.767  | 0.767 | 2.149 | 0.370 | 0.469 | 2.993  | -0.007 |
| Fe5-S1  | 2.482 | 2.120 | 0.370 | 0.376 |        |       | 2.149 | 0.370 | 0.407 |        |        |
| Fe5-S2B | 2.175 | 2.120 | 0.370 | 0.862 |        |       | 2.149 | 0.370 | 0.932 |        |        |
| Fe5-S4B | 2.107 | 2.120 | 0.370 | 1.036 |        |       | 2.149 | 0.370 | 1.120 |        |        |
| Fe5-SG  | 2.485 | 2.120 | 0.370 | 0.373 | 2.646  | 0.646 | 2.149 | 0.370 | 0.403 | 2.862  | -0.138 |
| Fe6-S1  | 3.002 | 2.120 | 0.370 | 0.092 |        |       | 2.149 | 0.370 | 0.100 |        |        |
| Fe6-S2B | 2.180 | 2.120 | 0.370 | 0.850 |        |       | 2.149 | 0.370 | 0.920 |        |        |
| Fe6-S3B | 2.135 | 2.120 | 0.370 | 0.960 |        |       | 2.149 | 0.370 | 1.039 |        |        |
| Fe6-SG  | 2.406 | 2.120 | 0.370 | 0.462 | 2.364  | 0.364 | 2.149 | 0.370 | 0.499 | 2.557  | -0.443 |
| Fe7-S2B | 2.180 | 2.120 | 0.370 | 0.850 |        |       | 2.149 | 0.370 | 0.920 |        |        |
| Fe7-S3B | 2.225 | 2.120 | 0.370 | 0.753 |        |       | 2.149 | 0.370 | 0.814 |        |        |
| Fe7-S4B | 2.211 | 2.120 | 0.370 | 0.782 |        |       | 2.149 | 0.370 | 0.846 |        |        |
| Fe7-SG  | 2.541 | 2.120 | 0.370 | 0.321 | 2.706  | 0.706 | 2.149 | 0.370 | 0.347 | 2.926  | -0.074 |
| Fe8-S1  | 2.326 | 2.120 | 0.370 | 0.573 |        |       | 2.149 | 0.370 | 0.620 |        |        |
| Fe8-S3B | 2.172 | 2.120 | 0.370 | 0.869 |        |       | 2.149 | 0.370 | 0.940 |        |        |
| Fe8-S4B | 2.217 | 2.120 | 0.370 | 0.769 |        |       | 2.149 | 0.370 | 0.832 |        |        |
| Fe8-SG  | 2.419 | 2.120 | 0.370 | 0.446 | 2.657  | 0.657 | 2.149 | 0.370 | 0.482 | 2.874  | -0.126 |
|         |       |       |       |       | 21.544 |       |       |       |       | 23.301 |        |

**Table S19** The abandoned valence analyses for irons in P-cluster [2] from MoFe protein 6BBL whose conformations resemble P<sup>N</sup> but overall bond distance are on small side at 1.68 Å resolution.

| Bond                  | $r_{ij}$ (Å) | $R_0$ (Å) | B (Å) | Bval  | Sum   | Diff.                 | $R_0$ (Å) | B (Å) | Bval  | Sum   | Diff.  |
|-----------------------|--------------|-----------|-------|-------|-------|-----------------------|-----------|-------|-------|-------|--------|
| expected valence = +2 |              |           |       |       |       | expected valence = +3 |           |       |       |       |        |
| Fe1-S1                | 2.308        | 2.120     | 0.370 | 0.602 |       |                       | 2.149     | 0.370 | 0.651 |       |        |
| Fe1-S2A               | 2.162        | 2.120     | 0.370 | 0.893 |       |                       | 2.149     | 0.370 | 0.965 |       |        |
| Fe1-S3A               | 2.163        | 2.120     | 0.370 | 0.890 |       |                       | 2.149     | 0.370 | 0.963 |       |        |
| Fe1-SG                | 2.745        | 2.120     | 0.370 | 0.185 | 2.569 | 0.569                 | 2.149     | 0.370 | 0.200 | 2.779 | -0.221 |
| Fe2-S1                | 2.425        | 2.120     | 0.370 | 0.439 |       |                       | 2.149     | 0.370 | 0.474 |       |        |
| Fe2-S2A               | 2.161        | 2.120     | 0.370 | 0.895 |       |                       | 2.149     | 0.370 | 0.968 |       |        |
| Fe2-S4A               | 2.141        | 2.120     | 0.370 | 0.945 |       |                       | 2.149     | 0.370 | 1.022 |       |        |
| Fe2-SG                | 2.418        | 2.120     | 0.370 | 0.447 | 2.725 | 0.725                 | 2.149     | 0.370 | 0.483 | 2.948 | -0.052 |
| Fe3-S2A               | 2.222        | 2.120     | 0.370 | 0.759 |       |                       | 2.149     | 0.370 | 0.821 |       |        |
| Fe3-S3A               | 2.204        | 2.120     | 0.370 | 0.797 |       |                       | 2.149     | 0.370 | 0.862 |       |        |
| Fe3-S4A               | 2.177        | 2.120     | 0.370 | 0.857 |       |                       | 2.149     | 0.370 | 0.927 |       |        |
| Fe3-SG                | 2.391        | 2.120     | 0.370 | 0.481 | 2.894 | 0.894                 | 2.149     | 0.370 | 0.520 | 3.130 | 0.130  |
| Fe4-S1                | 2.362        | 2.120     | 0.370 | 0.520 |       |                       | 2.149     | 0.370 | 0.562 |       |        |
| Fe4-S3A               | 2.184        | 2.120     | 0.370 | 0.841 |       |                       | 2.149     | 0.370 | 0.910 |       |        |
| Fe4-S4A               | 2.168        | 2.120     | 0.370 | 0.878 |       |                       | 2.149     | 0.370 | 0.950 |       |        |

|         |       |       |       |       |        |       |       |       |       |        |        |
|---------|-------|-------|-------|-------|--------|-------|-------|-------|-------|--------|--------|
| Fe4-SG  | 2.458 | 2.120 | 0.370 | 0.401 | 2.641  | 0.641 | 2.149 | 0.370 | 0.434 | 2.856  | -0.144 |
| Fe5-S1  | 2.492 | 2.120 | 0.370 | 0.366 |        |       | 2.149 | 0.370 | 0.396 |        |        |
| Fe5-S2B | 2.181 | 2.120 | 0.370 | 0.848 |        |       | 2.149 | 0.370 | 0.917 |        |        |
| Fe5-S4B | 2.099 | 2.120 | 0.370 | 1.058 |        |       | 2.149 | 0.370 | 1.145 |        |        |
| Fe5-SG  | 2.543 | 2.120 | 0.370 | 0.319 | 2.591  | 0.591 | 2.149 | 0.370 | 0.345 | 2.802  | -0.198 |
| Fe6-S1  | 3.020 | 2.120 | 0.370 | 0.088 |        |       | 2.149 | 0.370 | 0.095 |        |        |
| Fe6-S2B | 2.175 | 2.120 | 0.370 | 0.862 |        |       | 2.149 | 0.370 | 0.932 |        |        |
| Fe6-S3B | 2.127 | 2.120 | 0.370 | 0.981 |        |       | 2.149 | 0.370 | 1.061 |        |        |
| Fe6-SG  | 2.454 | 2.120 | 0.370 | 0.405 | 2.336  | 0.336 | 2.149 | 0.370 | 0.439 | 2.527  | -0.473 |
| Fe7-S2B | 2.174 | 2.120 | 0.370 | 0.864 |        |       | 2.149 | 0.370 | 0.935 |        |        |
| Fe7-S3B | 2.205 | 2.120 | 0.370 | 0.795 |        |       | 2.149 | 0.370 | 0.860 |        |        |
| Fe7-S4B | 2.187 | 2.120 | 0.370 | 0.834 |        |       | 2.149 | 0.370 | 0.902 |        |        |
| Fe7-SG  | 2.513 | 2.120 | 0.370 | 0.346 | 2.839  | 0.839 | 2.149 | 0.370 | 0.374 | 3.070  | 0.070  |
| Fe8-S1  | 2.329 | 2.120 | 0.370 | 0.568 |        |       | 2.149 | 0.370 | 0.615 |        |        |
| Fe8-S3B | 2.173 | 2.120 | 0.370 | 0.867 |        |       | 2.149 | 0.370 | 0.937 |        |        |
| Fe8-S4B | 2.213 | 2.120 | 0.370 | 0.778 |        |       | 2.149 | 0.370 | 0.841 |        |        |
| Fe8-SG  | 2.428 | 2.120 | 0.370 | 0.435 | 2.648  | 0.648 | 2.149 | 0.370 | 0.470 | 2.864  | -0.136 |
|         |       |       |       |       | 21.243 |       |       |       |       | 22.975 |        |

**Table S20** The abandoned valence analyses for irons in P-cluster [1] from MoFe protein 6OP1 at resolution of 1.7 Å. Faulty data in  $R_0$  (+2) are bold highlighted.

| Bond                  | $r_{ij}$ (Å) | $R_0$ (Å) | B (Å) | Bval  | Sum          | Diff.                 | $R_0$ (Å) | B (Å) | Bval  | Sum   | Diff. |
|-----------------------|--------------|-----------|-------|-------|--------------|-----------------------|-----------|-------|-------|-------|-------|
| expected valence = +2 |              |           |       |       |              | expected valence = +3 |           |       |       |       |       |
| Fe1-S1                | 2.458        | 2.120     | 0.370 | 0.401 |              |                       | 2.149     | 0.370 | 0.434 |       |       |
| Fe1-S2A               | 2.015        | 2.120     | 0.370 | 1.328 |              |                       | 2.149     | 0.370 | 1.436 |       |       |
| Fe1-S3A               | 2.110        | 2.120     | 0.370 | 1.027 |              |                       | 2.149     | 0.370 | 1.111 |       |       |
| Fe1-SG                | 2.444        | 2.120     | 0.370 | 0.417 | <b>3.173</b> | 1.173                 | 2.149     | 0.370 | 0.451 | 3.432 | 0.432 |
| Fe2-S1                | 2.384        | 2.120     | 0.370 | 0.490 |              |                       | 2.149     | 0.370 | 0.530 |       |       |
| Fe2-S2A               | 2.121        | 2.120     | 0.370 | 0.997 |              |                       | 2.149     | 0.370 | 1.079 |       |       |
| Fe2-S4A               | 2.176        | 2.120     | 0.370 | 0.860 |              |                       | 2.149     | 0.370 | 0.930 |       |       |
| Fe2-SG                | 2.404        | 2.120     | 0.370 | 0.464 | 2.811        | 0.811                 | 2.149     | 0.370 | 0.502 | 3.040 | 0.040 |
| Fe3-S2A               | 2.143        | 2.120     | 0.370 | 0.940 |              |                       | 2.149     | 0.370 | 1.016 |       |       |
| Fe3-S3A               | 2.308        | 2.120     | 0.370 | 0.602 |              |                       | 2.149     | 0.370 | 0.651 |       |       |
| Fe3-S4A               | 2.118        | 2.120     | 0.370 | 1.005 |              |                       | 2.149     | 0.370 | 1.087 |       |       |
| Fe3-SG                | 2.355        | 2.120     | 0.370 | 0.530 | 3.077        | 1.077                 | 2.149     | 0.370 | 0.573 | 3.327 | 0.327 |
| Fe4-S1                | 2.410        | 2.120     | 0.370 | 0.457 |              |                       | 2.149     | 0.370 | 0.494 |       |       |
| Fe4-S3A               | 2.111        | 2.120     | 0.370 | 1.025 |              |                       | 2.149     | 0.370 | 1.108 |       |       |
| Fe4-S4A               | 2.145        | 2.120     | 0.370 | 0.935 |              |                       | 2.149     | 0.370 | 1.011 |       |       |



|         |       |       |       |       |        |       |       |       |       |        |        |
|---------|-------|-------|-------|-------|--------|-------|-------|-------|-------|--------|--------|
| Fe4-SG  | 2.443 | 2.120 | 0.370 | 0.418 | 2.834  | 0.834 | 2.149 | 0.370 | 0.452 | 3.065  | 0.065  |
| Fe5-S1  | 2.400 | 2.120 | 0.370 | 0.469 |        |       | 2.149 | 0.370 | 0.507 |        |        |
| Fe5-S2B | 2.319 | 2.120 | 0.370 | 0.584 |        |       | 2.149 | 0.370 | 0.632 |        |        |
| Fe5-S4B | 2.306 | 2.120 | 0.370 | 0.605 |        |       | 2.149 | 0.370 | 0.654 |        |        |
| Fe5-SG  | 2.310 | 2.120 | 0.370 | 0.598 | 2.256  | 0.256 | 2.149 | 0.370 | 0.647 | 2.440  | -0.560 |
| Fe6-S1  | 2.485 | 2.120 | 0.370 | 0.373 |        |       | 2.149 | 0.370 | 0.403 |        |        |
| Fe6-S2B | 2.352 | 2.120 | 0.370 | 0.534 |        |       | 2.149 | 0.370 | 0.578 |        |        |
| Fe6-S3B | 2.290 | 2.120 | 0.370 | 0.632 |        |       | 2.149 | 0.370 | 0.683 |        |        |
| Fe6-SG  | 2.341 | 2.120 | 0.370 | 0.550 | 2.089  | 0.089 | 2.149 | 0.370 | 0.595 | 2.259  | -0.741 |
| Fe7-S2B | 2.374 | 2.120 | 0.370 | 0.503 |        |       | 2.149 | 0.370 | 0.544 |        |        |
| Fe7-S3B | 2.324 | 2.120 | 0.370 | 0.576 |        |       | 2.149 | 0.370 | 0.623 |        |        |
| Fe7-S4B | 2.303 | 2.120 | 0.370 | 0.610 |        |       | 2.149 | 0.370 | 0.660 |        |        |
| Fe7-SG  | 2.386 | 2.120 | 0.370 | 0.487 | 2.177  | 0.177 | 2.149 | 0.370 | 0.527 | 2.354  | -0.646 |
| Fe8-S1  | 2.348 | 2.120 | 0.370 | 0.540 |        |       | 2.149 | 0.370 | 0.584 |        |        |
| Fe8-S3B | 2.310 | 2.120 | 0.370 | 0.598 |        |       | 2.149 | 0.370 | 0.647 |        |        |
| Fe8-S4B | 2.301 | 2.120 | 0.370 | 0.613 |        |       | 2.149 | 0.370 | 0.663 |        |        |
| Fe8-SG  | 2.348 | 2.120 | 0.370 | 0.540 | 2.291  | 0.291 | 2.149 | 0.370 | 0.584 | 2.478  | -0.522 |
|         |       |       |       |       | 20.708 |       |       |       |       | 22.396 |        |

---

**Table S21** The abandoned valence analyses for irons in P-cluster [2] from MoFe protein 6OP1 at resolution of 1.7 Å. Faulty data in  $R_0$  (+2) are bold highlighted.

| Bond                  | $r_{ij}$ (Å) | $R_0$ (Å) | B (Å) | Bval  | Sum   | Diff.                 | $R_0$ (Å) | B (Å) | Bval  | Sum   | Diff.  |
|-----------------------|--------------|-----------|-------|-------|-------|-----------------------|-----------|-------|-------|-------|--------|
| expected valence = +2 |              |           |       |       |       | expected valence = +3 |           |       |       |       |        |
| Fe1-S1                | 2.456        | 2.120     | 0.370 | 0.403 |       |                       | 2.149     | 0.370 | 0.436 |       |        |
| Fe1-S2A               | 2.160        | 2.120     | 0.370 | 0.898 |       |                       | 2.149     | 0.370 | 0.971 |       |        |
| Fe1-S3A               | 2.086        | 2.120     | 0.370 | 1.096 |       |                       | 2.149     | 0.370 | 1.186 |       |        |
| Fe1-SG                | 2.403        | 2.120     | 0.370 | 0.465 | 2.862 | 0.862                 | 2.149     | 0.370 | 0.503 | 3.096 | 0.096  |
| Fe2-S1                | 2.392        | 2.120     | 0.370 | 0.479 |       |                       | 2.149     | 0.370 | 0.519 |       |        |
| Fe2-S2A               | 2.188        | 2.120     | 0.370 | 0.832 |       |                       | 2.149     | 0.370 | 0.900 |       |        |
| Fe2-S4A               | 2.172        | 2.120     | 0.370 | 0.869 |       |                       | 2.149     | 0.370 | 0.940 |       |        |
| Fe2-SG                | 2.406        | 2.120     | 0.370 | 0.462 | 2.642 | 0.642                 | 2.149     | 0.370 | 0.499 | 2.857 | -0.143 |
| Fe3-S2A               | 2.102        | 2.120     | 0.370 | 1.050 |       |                       | 2.149     | 0.370 | 1.135 |       |        |
| Fe3-S3A               | 2.332        | 2.120     | 0.370 | 0.564 |       |                       | 2.149     | 0.370 | 0.610 |       |        |
| Fe3-S4A               | 2.131        | 2.120     | 0.370 | 0.971 |       |                       | 2.149     | 0.370 | 1.050 |       |        |
| Fe3-SG                | 2.395        | 2.120     | 0.370 | 0.476 | 3.060 | 1.060                 | 2.149     | 0.370 | 0.514 | 3.309 | 0.309  |
| Fe4-S1                | 2.396        | 2.120     | 0.370 | 0.474 |       |                       | 2.149     | 0.370 | 0.513 |       |        |
| Fe4-S3A               | 2.103        | 2.120     | 0.370 | 1.047 |       |                       | 2.149     | 0.370 | 1.132 |       |        |

|         |       |       |       |       |              |       |       |       |       |        |        |
|---------|-------|-------|-------|-------|--------------|-------|-------|-------|-------|--------|--------|
| Fe4-S4A | 2.038 | 2.120 | 0.370 | 1.248 |              |       | 2.149 | 0.370 | 1.350 |        |        |
| Fe4-SG  | 2.477 | 2.120 | 0.370 | 0.381 | <b>3.150</b> | 1.150 | 2.149 | 0.370 | 0.412 | 3.407  | 0.407  |
| Fe5-S1  | 2.440 | 2.120 | 0.370 | 0.421 |              |       | 2.149 | 0.370 | 0.455 |        |        |
| Fe5-S2B | 2.299 | 2.120 | 0.370 | 0.616 |              |       | 2.149 | 0.370 | 0.667 |        |        |
| Fe5-S4B | 2.314 | 2.120 | 0.370 | 0.592 |              |       | 2.149 | 0.370 | 0.640 |        |        |
| Fe5-SG  | 2.333 | 2.120 | 0.370 | 0.562 | 2.192        | 0.192 | 2.149 | 0.370 | 0.608 | 2.371  | -0.629 |
| Fe6-S1  | 2.494 | 2.120 | 0.370 | 0.364 |              |       | 2.149 | 0.370 | 0.394 |        |        |
| Fe6-S2B | 2.353 | 2.120 | 0.370 | 0.533 |              |       | 2.149 | 0.370 | 0.576 |        |        |
| Fe6-S3B | 2.274 | 2.120 | 0.370 | 0.660 |              |       | 2.149 | 0.370 | 0.713 |        |        |
| Fe6-SG  | 2.347 | 2.120 | 0.370 | 0.541 | 2.098        | 0.098 | 2.149 | 0.370 | 0.586 | 2.269  | -0.731 |
| Fe7-S2B | 2.353 | 2.120 | 0.370 | 0.533 |              |       | 2.149 | 0.370 | 0.576 |        |        |
| Fe7-S3B | 2.316 | 2.120 | 0.370 | 0.589 |              |       | 2.149 | 0.370 | 0.637 |        |        |
| Fe7-S4B | 2.299 | 2.120 | 0.370 | 0.616 |              |       | 2.149 | 0.370 | 0.667 |        |        |
| Fe7-SG  | 2.390 | 2.120 | 0.370 | 0.482 | 2.220        | 0.220 | 2.149 | 0.370 | 0.521 | 2.401  | -0.599 |
| Fe8-S1  | 2.359 | 2.120 | 0.370 | 0.524 |              |       | 2.149 | 0.370 | 0.567 |        |        |
| Fe8-S3B | 2.288 | 2.120 | 0.370 | 0.635 |              |       | 2.149 | 0.370 | 0.687 |        |        |
| Fe8-S4B | 2.285 | 2.120 | 0.370 | 0.640 |              |       | 2.149 | 0.370 | 0.692 |        |        |
| Fe8-SG  | 2.382 | 2.120 | 0.370 | 0.493 | 2.292        | 0.292 | 2.149 | 0.370 | 0.533 | 2.479  | -0.521 |
|         |       |       |       |       | 20.516       |       |       |       |       | 22.189 |        |

**Table S22** The abandoned valence analyses for irons in P-cluster [1] from MoFe protein 6OP2 at resolution of 1.9 Å. Faulty data in  $R_0$  (+2) are bold highlighted.

| Bond                  | $r_{ij}$ (Å) | $R_0$ (Å) | B (Å) | Bval  | Sum          | Diff.                 | $R_0$ (Å) | B (Å) | Bval  | Sum   | Diff.  |
|-----------------------|--------------|-----------|-------|-------|--------------|-----------------------|-----------|-------|-------|-------|--------|
| expected valence = +2 |              |           |       |       |              | expected valence = +3 |           |       |       |       |        |
| Fe1-S1                | 2.477        | 2.120     | 0.370 | 0.381 |              |                       | 2.149     | 0.370 | 0.412 |       |        |
| Fe1-S2A               | 2.141        | 2.120     | 0.370 | 0.945 |              |                       | 2.149     | 0.370 | 1.022 |       |        |
| Fe1-S3A               | 2.025        | 2.120     | 0.370 | 1.293 |              |                       | 2.149     | 0.370 | 1.398 |       |        |
| Fe1-SG                | 2.458        | 2.120     | 0.370 | 0.401 | 3.061        | 1.061                 | 2.149     | 0.370 | 0.434 | 3.136 | 0.136  |
| Fe2-S1                | 2.375        | 2.120     | 0.370 | 0.502 |              |                       | 2.149     | 0.370 | 0.543 |       |        |
| Fe2-S2A               | 2.167        | 2.120     | 0.370 | 0.881 |              |                       | 2.149     | 0.370 | 0.953 |       |        |
| Fe2-S4A               | 2.089        | 2.120     | 0.370 | 1.087 |              |                       | 2.149     | 0.370 | 1.176 |       |        |
| Fe2-SG                | 2.445        | 2.120     | 0.370 | 0.415 | 2.925        | 0.925                 | 2.149     | 0.370 | 0.449 | 2.997 | -0.003 |
| Fe3-S2A               | 1.988        | 2.120     | 0.370 | 1.429 |              |                       | 2.149     | 0.370 | 1.545 |       |        |
| Fe3-S3A               | 2.351        | 2.120     | 0.370 | 0.536 |              |                       | 2.149     | 0.370 | 0.579 |       |        |
| Fe3-S4A               | 2.039        | 2.120     | 0.370 | 1.245 |              |                       | 2.149     | 0.370 | 1.346 |       |        |
| Fe3-SG                | 2.390        | 2.120     | 0.370 | 0.482 | <b>3.741</b> | 1.741                 | 2.149     | 0.370 | 0.521 | 3.833 | 0.833  |
| Fe4-S1                | 2.351        | 2.120     | 0.370 | 0.536 |              |                       | 2.149     | 0.370 | 0.579 |       |        |
| Fe4-S3A               | 2.024        | 2.120     | 0.370 | 1.296 |              |                       | 2.149     | 0.370 | 1.402 |       |        |

|         |       |       |       |       |              |        |       |       |       |        |        |
|---------|-------|-------|-------|-------|--------------|--------|-------|-------|-------|--------|--------|
| Fe4-S4A | 1.976 | 2.120 | 0.370 | 1.476 |              |        | 2.149 | 0.370 | 1.596 |        |        |
| Fe4-SG  | 2.436 | 2.120 | 0.370 | 0.426 | <b>3.784</b> | 1.784  | 2.149 | 0.370 | 0.460 | 3.877  | 0.877  |
| Fe5-S1  | 2.381 | 2.120 | 0.370 | 0.494 |              |        | 2.149 | 0.370 | 0.534 |        |        |
| Fe5-S2B | 2.368 | 2.120 | 0.370 | 0.512 |              |        | 2.149 | 0.370 | 0.553 |        |        |
| Fe5-S4B | 2.290 | 2.120 | 0.370 | 0.632 |              |        | 2.149 | 0.370 | 0.683 |        |        |
| Fe5-SG  | 2.316 | 2.120 | 0.370 | 0.589 | 2.256        | 0.256  | 2.149 | 0.370 | 0.637 | 2.312  | -0.688 |
| Fe6-S1  | 2.555 | 2.120 | 0.370 | 0.309 |              |        | 2.149 | 0.370 | 0.334 |        |        |
| Fe6-S2B | 2.447 | 2.120 | 0.370 | 0.413 |              |        | 2.149 | 0.370 | 0.447 |        |        |
| Fe6-S3B | 2.251 | 2.120 | 0.370 | 0.702 |              |        | 2.149 | 0.370 | 0.759 |        |        |
| Fe6-SG  | 2.394 | 2.120 | 0.370 | 0.477 | 1.926        | -0.074 | 2.149 | 0.370 | 0.516 | 1.974  | -1.026 |
| Fe7-S2B | 2.368 | 2.120 | 0.370 | 0.512 |              |        | 2.149 | 0.370 | 0.553 |        |        |
| Fe7-S3B | 2.360 | 2.120 | 0.370 | 0.523 |              |        | 2.149 | 0.370 | 0.565 |        |        |
| Fe7-S4B | 2.317 | 2.120 | 0.370 | 0.587 |              |        | 2.149 | 0.370 | 0.635 |        |        |
| Fe7-SG  | 2.351 | 2.120 | 0.370 | 0.536 | 2.186        | 0.186  | 2.149 | 0.370 | 0.579 | 2.240  | -0.760 |
| Fe8-S1  | 2.371 | 2.120 | 0.370 | 0.507 |              |        | 2.149 | 0.370 | 0.549 |        |        |
| Fe8-S3B | 2.301 | 2.120 | 0.370 | 0.613 |              |        | 2.149 | 0.370 | 0.663 |        |        |
| Fe8-S4B | 2.284 | 2.120 | 0.370 | 0.642 |              |        | 2.149 | 0.370 | 0.694 |        |        |
| Fe8-SG  | 2.387 | 2.120 | 0.370 | 0.486 | 2.279        | 0.279  | 2.149 | 0.370 | 0.526 | 2.335  | -0.665 |
|         |       |       |       |       | 22.159       |        |       |       |       | 22.705 |        |

**Table S23** The abandoned valence analyses for irons in P-cluster [2] from MoFe protein 6OP2 at resolution of 1.9 Å. Faulty data in  $R_0$  (+2) are bold highlighted.

| Bond                  | $r_{ij}$ (Å) | $R_0$ (Å) | B (Å) | Bval  | Sum          | Diff.                 | $R_0$ (Å) | B (Å) | Bval  | Sum   | Diff. |
|-----------------------|--------------|-----------|-------|-------|--------------|-----------------------|-----------|-------|-------|-------|-------|
| expected valence = +2 |              |           |       |       |              | expected valence = +3 |           |       |       |       |       |
| Fe1-S1                | 2.450        | 2.120     | 0.370 | 0.410 |              |                       | 2.149     | 0.370 | 0.443 |       |       |
| Fe1-S2A               | 1.916        | 2.120     | 0.370 | 1.736 |              |                       | 2.149     | 0.370 | 1.877 |       |       |
| Fe1-S3A               | 1.993        | 2.120     | 0.370 | 1.410 |              |                       | 2.149     | 0.370 | 1.524 |       |       |
| Fe1-SG                | 2.425        | 2.120     | 0.370 | 0.439 | <b>3.994</b> | 1.994                 | 2.149     | 0.370 | 0.474 | 4.319 | 1.319 |
| Fe2-S1                | 2.416        | 2.120     | 0.370 | 0.449 |              |                       | 2.149     | 0.370 | 0.486 |       |       |
| Fe2-S2A               | 2.016        | 2.120     | 0.370 | 1.325 |              |                       | 2.149     | 0.370 | 1.433 |       |       |
| Fe2-S4A               | 2.113        | 2.120     | 0.370 | 1.019 |              |                       | 2.149     | 0.370 | 1.102 |       |       |
| Fe2-SG                | 2.422        | 2.120     | 0.370 | 0.442 | <b>3.235</b> | 1.235                 | 2.149     | 0.370 | 0.478 | 3.499 | 0.499 |
| Fe3-S2A               | 2.103        | 2.120     | 0.370 | 1.047 |              |                       | 2.149     | 0.370 | 1.132 |       |       |
| Fe3-S3A               | 2.206        | 2.120     | 0.370 | 0.793 |              |                       | 2.149     | 0.370 | 0.857 |       |       |
| Fe3-S4A               | 1.993        | 2.120     | 0.370 | 1.410 |              |                       | 2.149     | 0.370 | 1.524 |       |       |
| Fe3-SG                | 2.356        | 2.120     | 0.370 | 0.528 | <b>3.778</b> | 1.778                 | 2.149     | 0.370 | 0.572 | 4.086 | 1.086 |
| Fe4-S1                | 2.344        | 2.120     | 0.370 | 0.546 |              |                       | 2.149     | 0.370 | 0.590 |       |       |
| Fe4-S3A               | 2.020        | 2.120     | 0.370 | 1.310 |              |                       | 2.149     | 0.370 | 1.417 |       |       |

|         |       |       |       |       |              |        |       |       |       |        |        |
|---------|-------|-------|-------|-------|--------------|--------|-------|-------|-------|--------|--------|
| Fe4-S4A | 2.061 | 2.120 | 0.370 | 1.173 |              |        | 2.149 | 0.370 | 1.269 |        |        |
| Fe4-SG  | 2.403 | 2.120 | 0.370 | 0.465 | <b>3.494</b> | 1.494  | 2.149 | 0.370 | 0.503 | 3.779  | 0.779  |
| Fe5-S1  | 2.345 | 2.120 | 0.370 | 0.544 |              |        | 2.149 | 0.370 | 0.589 |        |        |
| Fe5-S2B | 2.326 | 2.120 | 0.370 | 0.573 |              |        | 2.149 | 0.370 | 0.620 |        |        |
| Fe5-S4B | 2.284 | 2.120 | 0.370 | 0.642 |              |        | 2.149 | 0.370 | 0.694 |        |        |
| Fe5-SG  | 2.319 | 2.120 | 0.370 | 0.584 | 2.343        | 0.343  | 2.149 | 0.370 | 0.632 | 2.534  | -0.466 |
| Fe6-S1  | 2.498 | 2.120 | 0.370 | 0.360 |              |        | 2.149 | 0.370 | 0.389 |        |        |
| Fe6-S2B | 2.380 | 2.120 | 0.370 | 0.495 |              |        | 2.149 | 0.370 | 0.536 |        |        |
| Fe6-S3B | 2.267 | 2.120 | 0.370 | 0.672 |              |        | 2.149 | 0.370 | 0.727 |        |        |
| Fe6-SG  | 2.406 | 2.120 | 0.370 | 0.462 | 1.989        | -0.011 | 2.149 | 0.370 | 0.499 | 2.151  | -0.849 |
| Fe7-S2B | 2.332 | 2.120 | 0.370 | 0.564 |              |        | 2.149 | 0.370 | 0.610 |        |        |
| Fe7-S3B | 2.365 | 2.120 | 0.370 | 0.516 |              |        | 2.149 | 0.370 | 0.558 |        |        |
| Fe7-S4B | 2.340 | 2.120 | 0.370 | 0.552 |              |        | 2.149 | 0.370 | 0.597 |        |        |
| Fe7-SG  | 2.325 | 2.120 | 0.370 | 0.575 | 2.206        | 0.206  | 2.149 | 0.370 | 0.621 | 2.386  | -0.614 |
| Fe8-S1  | 2.340 | 2.120 | 0.370 | 0.552 |              |        | 2.149 | 0.370 | 0.597 |        |        |
| Fe8-S3B | 2.274 | 2.120 | 0.370 | 0.660 |              |        | 2.149 | 0.370 | 0.713 |        |        |
| Fe8-S4B | 2.274 | 2.120 | 0.370 | 0.660 |              |        | 2.149 | 0.370 | 0.713 |        |        |
| Fe8-SG  | 2.414 | 2.120 | 0.370 | 0.452 | 2.323        | 0.323  | 2.149 | 0.370 | 0.489 | 2.512  | -0.488 |
|         |       |       |       |       | 23.362       |        |       |       |       | 25.266 |        |

---

**Table S24** The abandoned valence analyses for irons in P-cluster [1] from MoFe protein 6OP4 at resolution of 2.3 Å. Faulty data in  $R_0$  (+2) are bold highlighted.

| Bond                  | $r_{ij}$ (Å) | $R_0$ (Å) | B (Å) | Bval  | Sum          | Diff.                 | $R_0$ (Å) | B (Å) | Bval  | Sum   | Diff. |
|-----------------------|--------------|-----------|-------|-------|--------------|-----------------------|-----------|-------|-------|-------|-------|
| expected valence = +2 |              |           |       |       |              | expected valence = +3 |           |       |       |       |       |
| Fe1-S1                | 2.477        | 2.12      | 0.37  | 0.381 |              |                       | 2.149     | 0.37  | 0.412 |       |       |
| Fe1-S2A               | 2.156        | 2.12      | 0.37  | 0.907 |              |                       | 2.149     | 0.37  | 0.981 |       |       |
| Fe1-S3A               | 1.989        | 2.12      | 0.37  | 1.425 |              |                       | 2.149     | 0.37  | 1.541 |       |       |
| Fe1-SG                | 2.374        | 2.12      | 0.37  | 0.503 | <b>3.216</b> | 1.216                 | 2.149     | 0.37  | 0.544 | 3.479 | 0.479 |
| Fe2-S1                | 2.411        | 2.12      | 0.37  | 0.455 |              |                       | 2.149     | 0.37  | 0.493 |       |       |
| Fe2-S2A               | 2.122        | 2.12      | 0.37  | 0.995 |              |                       | 2.149     | 0.37  | 1.076 |       |       |
| Fe2-S4A               | 2.053        | 2.12      | 0.37  | 1.199 |              |                       | 2.149     | 0.37  | 1.296 |       |       |
| Fe2-SG                | 2.442        | 2.12      | 0.37  | 0.419 | 3.067        | 1.067                 | 2.149     | 0.37  | 0.453 | 3.317 | 0.317 |
| Fe3-S2A               | 2.021        | 2.12      | 0.37  | 1.307 |              |                       | 2.149     | 0.37  | 1.413 |       |       |
| Fe3-S3A               | 2.174        | 2.12      | 0.37  | 0.864 |              |                       | 2.149     | 0.37  | 0.935 |       |       |
| Fe3-S4A               | 2.050        | 2.12      | 0.37  | 1.208 |              |                       | 2.149     | 0.37  | 1.307 |       |       |
| Fe3-SG                | 2.358        | 2.12      | 0.37  | 0.526 | <b>3.905</b> | 1.905                 | 2.149     | 0.37  | 0.568 | 4.223 | 1.223 |
| Fe4-S1                | 2.360        | 2.12      | 0.37  | 0.523 |              |                       | 2.149     | 0.37  | 0.565 |       |       |
| Fe4-S3A               | 1.997        | 2.12      | 0.37  | 1.394 |              |                       | 2.149     | 0.37  | 1.508 |       |       |



|         |       |      |      |       |              |        |       |      |       |        |        |
|---------|-------|------|------|-------|--------------|--------|-------|------|-------|--------|--------|
| Fe4-S4A | 2.028 | 2.12 | 0.37 | 1.282 |              |        | 2.149 | 0.37 | 1.387 |        |        |
| Fe4-SG  | 2.321 | 2.12 | 0.37 | 0.581 | <b>3.780</b> | 1.780  | 2.149 | 0.37 | 0.628 | 4.088  | 1.088  |
| Fe5-S1  | 2.405 | 2.12 | 0.37 | 0.463 |              |        | 2.149 | 0.37 | 0.501 |        |        |
| Fe5-S2B | 2.326 | 2.12 | 0.37 | 0.573 |              |        | 2.149 | 0.37 | 0.620 |        |        |
| Fe5-S4B | 2.257 | 2.12 | 0.37 | 0.691 |              |        | 2.149 | 0.37 | 0.747 |        |        |
| Fe5-SG  | 2.405 | 2.12 | 0.37 | 0.463 | 2.189        | 0.189  | 2.149 | 0.37 | 0.501 | 2.368  | -0.632 |
| Fe6-S1  | 2.550 | 2.12 | 0.37 | 0.313 |              |        | 2.149 | 0.37 | 0.338 |        |        |
| Fe6-S2B | 2.414 | 2.12 | 0.37 | 0.452 |              |        | 2.149 | 0.37 | 0.489 |        |        |
| Fe6-S3B | 2.274 | 2.12 | 0.37 | 0.660 |              |        | 2.149 | 0.37 | 0.713 |        |        |
| Fe6-SG  | 2.328 | 2.12 | 0.37 | 0.570 | 1.994        | -0.006 | 2.149 | 0.37 | 0.616 | 2.157  | -0.843 |
| Fe7-S2B | 2.340 | 2.12 | 0.37 | 0.552 |              |        | 2.149 | 0.37 | 0.597 |        |        |
| Fe7-S3B | 2.285 | 2.12 | 0.37 | 0.640 |              |        | 2.149 | 0.37 | 0.692 |        |        |
| Fe7-S4B | 2.299 | 2.12 | 0.37 | 0.616 |              |        | 2.149 | 0.37 | 0.667 |        |        |
| Fe7-SG  | 2.323 | 2.12 | 0.37 | 0.578 | 2.386        | 0.386  | 2.149 | 0.37 | 0.625 | 2.581  | -0.419 |
| Fe8-S1  | 2.364 | 2.12 | 0.37 | 0.517 |              |        | 2.149 | 0.37 | 0.559 |        |        |
| Fe8-S3B | 2.256 | 2.12 | 0.37 | 0.692 |              |        | 2.149 | 0.37 | 0.749 |        |        |
| Fe8-S4B | 2.267 | 2.12 | 0.37 | 0.672 |              |        | 2.149 | 0.37 | 0.727 |        |        |
| Fe8-SG  | 2.224 | 2.12 | 0.37 | 0.755 | 2.637        | 0.637  | 2.149 | 0.37 | 0.817 | 2.852  | -0.148 |
|         |       |      |      |       | 23.175       |        |       |      |       | 25.065 |        |

**Table S25** The abandoned valence analyses for irons in P-cluster [2] from MoFe protein 6OP4 at resolution of 2.3 Å. Faulty data in  $R_0$  (+2) are bold highlighted.

| Bond                  | $r_{ij}$ (Å) | $R_0$ (Å) | B (Å) | Bval  | Sum          | Diff.                 | $R_0$ (Å) | B (Å) | Bval  | Sum   | Diff. |
|-----------------------|--------------|-----------|-------|-------|--------------|-----------------------|-----------|-------|-------|-------|-------|
| expected valence = +2 |              |           |       |       |              | expected valence = +3 |           |       |       |       |       |
| Fe1-S1                | 2.443        | 2.120     | 0.370 | 0.418 |              |                       | 2.149     | 0.37  | 0.452 |       |       |
| Fe1-S2A               | 1.508        | 2.120     | 0.370 | 5.228 |              |                       | 2.149     | 0.37  | 5.654 |       |       |
| Fe1-S3A               | 1.920        | 2.120     | 0.370 | 1.717 |              |                       | 2.149     | 0.37  | 1.857 |       |       |
| Fe1-SG                | 2.369        | 2.120     | 0.370 | 0.510 | <b>7.873</b> | 5.873                 | 2.149     | 0.37  | 0.552 | 8.515 | 5.515 |
| Fe2-S1                | 2.448        | 2.120     | 0.370 | 0.412 |              |                       | 2.149     | 0.37  | 0.446 |       |       |
| Fe2-S2A               | 1.956        | 2.120     | 0.370 | 1.558 |              |                       | 2.149     | 0.37  | 1.685 |       |       |
| Fe2-S4A               | 2.063        | 2.120     | 0.370 | 1.167 |              |                       | 2.149     | 0.37  | 1.262 |       |       |
| Fe2-SG                | 2.397        | 2.120     | 0.370 | 0.473 | <b>3.609</b> | 1.609                 | 2.149     | 0.37  | 0.512 | 3.904 | 0.904 |
| Fe3-S2A               | 2.205        | 2.120     | 0.370 | 0.795 |              |                       | 2.149     | 0.37  | 0.860 |       |       |
| Fe3-S3A               | 2.188        | 2.120     | 0.370 | 0.832 |              |                       | 2.149     | 0.37  | 0.900 |       |       |
| Fe3-S4A               | 1.961        | 2.120     | 0.370 | 1.537 |              |                       | 2.149     | 0.37  | 1.662 |       |       |
| Fe3-SG                | 2.258        | 2.120     | 0.370 | 0.689 | <b>3.852</b> | 1.852                 | 2.149     | 0.37  | 0.745 | 4.166 | 1.166 |
| Fe4-S1                | 2.371        | 2.120     | 0.370 | 0.507 |              |                       | 2.149     | 0.37  | 0.549 |       |       |
| Fe4-S3A               | 1.986        | 2.120     | 0.370 | 1.436 |              |                       | 2.149     | 0.37  | 1.554 |       |       |

|         |       |       |       |       |              |        |       |      |       |        |        |
|---------|-------|-------|-------|-------|--------------|--------|-------|------|-------|--------|--------|
| Fe4-S4A | 1.975 | 2.120 | 0.370 | 1.480 |              |        | 2.149 | 0.37 | 1.600 |        |        |
| Fe4-SG  | 2.377 | 2.120 | 0.370 | 0.499 | <b>3.923</b> | 1.923  | 2.149 | 0.37 | 0.540 | 4.243  | 1.243  |
| Fe5-S1  | 2.300 | 2.120 | 0.370 | 0.615 |              |        | 2.149 | 0.37 | 0.665 |        |        |
| Fe5-S2B | 2.392 | 2.120 | 0.370 | 0.479 |              |        | 2.149 | 0.37 | 0.519 |        |        |
| Fe5-S4B | 2.210 | 2.120 | 0.370 | 0.784 |              |        | 2.149 | 0.37 | 0.848 |        |        |
| Fe5-SG  | 2.271 | 2.120 | 0.370 | 0.665 | 2.543        | 0.543  | 2.149 | 0.37 | 0.719 | 2.751  | -0.249 |
| Fe6-S1  | 2.438 | 2.120 | 0.370 | 0.423 |              |        | 2.149 | 0.37 | 0.458 |        |        |
| Fe6-S2B | 2.449 | 2.120 | 0.370 | 0.411 |              |        | 2.149 | 0.37 | 0.444 |        |        |
| Fe6-S3B | 2.282 | 2.120 | 0.370 | 0.645 |              |        | 2.149 | 0.37 | 0.698 |        |        |
| Fe6-SG  | 2.407 | 2.120 | 0.370 | 0.460 | 1.940        | -0.060 | 2.149 | 0.37 | 0.498 | 2.098  | -0.902 |
| Fe7-S2B | 2.287 | 2.120 | 0.370 | 0.637 |              |        | 2.149 | 0.37 | 0.689 |        |        |
| Fe7-S3B | 2.329 | 2.120 | 0.370 | 0.568 |              |        | 2.149 | 0.37 | 0.615 |        |        |
| Fe7-S4B | 2.361 | 2.120 | 0.370 | 0.521 |              |        | 2.149 | 0.37 | 0.564 |        |        |
| Fe7-SG  | 2.404 | 2.120 | 0.370 | 0.464 | 2.191        | 0.191  | 2.149 | 0.37 | 0.502 | 2.369  | -0.631 |
| Fe8-S1  | 2.314 | 2.120 | 0.370 | 0.592 |              |        | 2.149 | 0.37 | 0.640 |        |        |
| Fe8-S3B | 2.291 | 2.120 | 0.370 | 0.630 |              |        | 2.149 | 0.37 | 0.681 |        |        |
| Fe8-S4B | 2.291 | 2.120 | 0.370 | 0.630 |              |        | 2.149 | 0.37 | 0.681 |        |        |
| Fe8-SG  | 2.293 | 2.120 | 0.370 | 0.627 | 2.478        | 0.478  | 2.149 | 0.37 | 0.678 | 2.680  | -0.320 |
|         |       |       |       |       | 28.410       |        |       |      |       | 30.726 |        |

---

**Table S26** The adopted bond valence analyses for irons in P-cluster [1] from MoFe protein 1H1L which was reported as P<sup>N</sup> at 1.9 Å resolution.

| Bond                  | $r_{ij}$ (Å) | $R_0$ (Å) | B (Å) | Bval  | Sum   | Diff.                 | $R_0$ (Å) | B (Å) | Bval  | Sum   | Diff.  |
|-----------------------|--------------|-----------|-------|-------|-------|-----------------------|-----------|-------|-------|-------|--------|
| expected valence = +2 |              |           |       |       |       | expected valence = +3 |           |       |       |       |        |
| Fe1-S1                | 2.447        | 2.12      | 0.37  | 0.413 |       |                       | 2.149     | 0.37  | 0.447 |       |        |
| Fe1-S2A               | 2.330        | 2.12      | 0.37  | 0.567 |       |                       | 2.149     | 0.37  | 0.613 |       |        |
| Fe1-S3A               | 2.331        | 2.12      | 0.37  | 0.565 |       |                       | 2.149     | 0.37  | 0.611 |       |        |
| Fe1-SG                | 2.354        | 2.12      | 0.37  | 0.531 | 2.077 | 0.077                 | 2.149     | 0.37  | 0.575 | 2.246 | -0.754 |
| Fe2-S1                | 2.496        | 2.12      | 0.37  | 0.362 |       |                       | 2.149     | 0.37  | 0.391 |       |        |
| Fe2-S2A               | 2.353        | 2.12      | 0.37  | 0.533 |       |                       | 2.149     | 0.37  | 0.576 |       |        |
| Fe2-S4A               | 2.280        | 2.12      | 0.37  | 0.649 |       |                       | 2.149     | 0.37  | 0.702 |       |        |
| Fe2-SG                | 2.306        | 2.12      | 0.37  | 0.605 | 2.149 | 0.149                 | 2.149     | 0.37  | 0.654 | 2.324 | -0.676 |
| Fe3-S2A               | 2.328        | 2.12      | 0.37  | 0.570 |       |                       | 2.149     | 0.37  | 0.616 |       |        |
| Fe3-S3A               | 2.345        | 2.12      | 0.37  | 0.544 |       |                       | 2.149     | 0.37  | 0.589 |       |        |
| Fe3-S4A               | 2.326        | 2.12      | 0.37  | 0.573 |       |                       | 2.149     | 0.37  | 0.620 |       |        |
| Fe3-SG                | 2.291        | 2.12      | 0.37  | 0.630 | 2.317 | 0.317                 | 2.149     | 0.37  | 0.681 | 2.506 | -0.494 |
| Fe4-S1                | 2.473        | 2.12      | 0.37  | 0.385 |       |                       | 2.149     | 0.37  | 0.417 |       |        |
| Fe4-S3A               | 2.329        | 2.12      | 0.37  | 0.568 |       |                       | 2.149     | 0.37  | 0.615 |       |        |
| Fe4-S4A               | 2.243        | 2.12      | 0.37  | 0.717 |       |                       | 2.149     | 0.37  | 0.776 |       |        |

|         |       |      |      |       |        |        |       |      |       |        |        |
|---------|-------|------|------|-------|--------|--------|-------|------|-------|--------|--------|
| Fe4-SG  | 2.268 | 2.12 | 0.37 | 0.670 | 2.341  | 0.341  | 2.149 | 0.37 | 0.725 | 2.532  | -0.468 |
| Fe5-S1  | 2.460 | 2.12 | 0.37 | 0.399 |        |        | 2.149 | 0.37 | 0.431 |        |        |
| Fe5-S2B | 2.350 | 2.12 | 0.37 | 0.537 |        |        | 2.149 | 0.37 | 0.581 |        |        |
| Fe5-S4B | 2.356 | 2.12 | 0.37 | 0.528 |        |        | 2.149 | 0.37 | 0.572 |        |        |
| Fe5-SG  | 2.357 | 2.12 | 0.37 | 0.527 | 1.991  | -0.009 | 2.149 | 0.37 | 0.570 | 2.154  | -0.846 |
| Fe6-S1  | 2.477 | 2.12 | 0.37 | 0.381 |        |        | 2.149 | 0.37 | 0.412 |        |        |
| Fe6-S2B | 2.337 | 2.12 | 0.37 | 0.556 |        |        | 2.149 | 0.37 | 0.602 |        |        |
| Fe6-S3B | 2.342 | 2.12 | 0.37 | 0.549 |        |        | 2.149 | 0.37 | 0.594 |        |        |
| Fe6-SG  | 2.339 | 2.12 | 0.37 | 0.553 | 2.039  | 0.039  | 2.149 | 0.37 | 0.598 | 2.206  | -0.794 |
| Fe7-S2B | 2.323 | 2.12 | 0.37 | 0.578 |        |        | 2.149 | 0.37 | 0.625 |        |        |
| Fe7-S3B | 2.407 | 2.12 | 0.37 | 0.460 |        |        | 2.149 | 0.37 | 0.498 |        |        |
| Fe7-S4B | 2.328 | 2.12 | 0.37 | 0.570 |        |        | 2.149 | 0.37 | 0.616 |        |        |
| Fe7-SG  | 2.306 | 2.12 | 0.37 | 0.605 | 2.213  | 0.213  | 2.149 | 0.37 | 0.654 | 2.393  | -0.607 |
| Fe8-S1  | 2.446 | 2.12 | 0.37 | 0.414 |        |        | 2.149 | 0.37 | 0.448 |        |        |
| Fe8-S3B | 2.387 | 2.12 | 0.37 | 0.486 |        |        | 2.149 | 0.37 | 0.526 |        |        |
| Fe8-S4B | 2.289 | 2.12 | 0.37 | 0.634 |        |        | 2.149 | 0.37 | 0.685 |        |        |
| Fe8-SG  | 2.254 | 2.12 | 0.37 | 0.696 | 2.230  | 0.230  | 2.149 | 0.37 | 0.753 | 2.412  | -0.588 |
|         |       |      |      |       | 17.358 |        |       |      |       | 18.773 |        |

---

**Table S27** The adopted bond valence analyses for irons in P-cluster [2] from MoFe protein 1H1L which was reported as P<sup>N</sup> at 1.9 Å resolution.

| Bond                  | $r_{ij}$ (Å) | $R_0$ (Å) | B (Å) | Bval  | Sum   | Diff.                 | $R_0$ (Å) | B (Å) | Bval  | Sum   | Diff.  |
|-----------------------|--------------|-----------|-------|-------|-------|-----------------------|-----------|-------|-------|-------|--------|
| expected valence = +2 |              |           |       |       |       | expected valence = +3 |           |       |       |       |        |
| Fe1-S1                | 2.472        | 2.12      | 0.37  | 0.386 |       |                       | 2.149     | 0.37  | 0.418 |       |        |
| Fe1-S2A               | 2.331        | 2.12      | 0.37  | 0.565 |       |                       | 2.149     | 0.37  | 0.611 |       |        |
| Fe1-S3A               | 2.299        | 2.12      | 0.37  | 0.616 |       |                       | 2.149     | 0.37  | 0.667 |       |        |
| Fe1-SG                | 2.353        | 2.12      | 0.37  | 0.533 | 2.101 | 0.101                 | 2.149     | 0.37  | 0.576 | 2.272 | -0.728 |
| Fe2-S1                | 2.472        | 2.12      | 0.37  | 0.386 |       |                       | 2.149     | 0.37  | 0.418 |       |        |
| Fe2-S2A               | 2.326        | 2.12      | 0.37  | 0.573 |       |                       | 2.149     | 0.37  | 0.620 |       |        |
| Fe2-S4A               | 2.267        | 2.12      | 0.37  | 0.672 |       |                       | 2.149     | 0.37  | 0.727 |       |        |
| Fe2-SG                | 2.313        | 2.12      | 0.37  | 0.594 | 2.225 | 0.225                 | 2.149     | 0.37  | 0.642 | 2.406 | -0.594 |
| Fe3-S2A               | 2.374        | 2.12      | 0.37  | 0.503 |       |                       | 2.149     | 0.37  | 0.544 |       |        |
| Fe3-S3A               | 2.294        | 2.12      | 0.37  | 0.625 |       |                       | 2.149     | 0.37  | 0.676 |       |        |
| Fe3-S4A               | 2.313        | 2.12      | 0.37  | 0.594 |       |                       | 2.149     | 0.37  | 0.642 |       |        |
| Fe3-SG                | 2.206        | 2.12      | 0.37  | 0.793 | 2.514 | 0.514                 | 2.149     | 0.37  | 0.857 | 2.719 | -0.281 |
| Fe4-S1                | 2.447        | 2.12      | 0.37  | 0.413 |       |                       | 2.149     | 0.37  | 0.447 |       |        |
| Fe4-S3A               | 2.332        | 2.12      | 0.37  | 0.564 |       |                       | 2.149     | 0.37  | 0.610 |       |        |
| Fe4-S4A               | 2.206        | 2.12      | 0.37  | 0.793 |       |                       | 2.149     | 0.37  | 0.857 |       |        |
| Fe4-SG                | 2.269        | 2.12      | 0.37  | 0.669 | 2.438 | 0.438                 | 2.149     | 0.37  | 0.723 | 2.637 | -0.363 |

|         |       |      |      |       |        |        |       |      |       |        |        |
|---------|-------|------|------|-------|--------|--------|-------|------|-------|--------|--------|
| Fe5-S1  | 2.453 | 2.12 | 0.37 | 0.407 |        |        | 2.149 | 0.37 | 0.440 |        |        |
| Fe5-S2B | 2.312 | 2.12 | 0.37 | 0.595 |        |        | 2.149 | 0.37 | 0.644 |        |        |
| Fe5-S4B | 2.361 | 2.12 | 0.37 | 0.521 |        |        | 2.149 | 0.37 | 0.564 |        |        |
| Fe5-SG  | 2.311 | 2.12 | 0.37 | 0.597 | 2.120  | 0.120  | 2.149 | 0.37 | 0.645 | 2.293  | -0.707 |
| Fe6-S1  | 2.509 | 2.12 | 0.37 | 0.349 |        |        | 2.149 | 0.37 | 0.378 |        |        |
| Fe6-S2B | 2.372 | 2.12 | 0.37 | 0.506 |        |        | 2.149 | 0.37 | 0.547 |        |        |
| Fe6-S3B | 2.350 | 2.12 | 0.37 | 0.537 |        |        | 2.149 | 0.37 | 0.581 |        |        |
| Fe6-SG  | 2.327 | 2.12 | 0.37 | 0.572 | 1.964  | -0.036 | 2.149 | 0.37 | 0.618 | 2.124  | -0.876 |
| Fe7-S2B | 2.368 | 2.12 | 0.37 | 0.512 |        |        | 2.149 | 0.37 | 0.553 |        |        |
| Fe7-S3B | 2.379 | 2.12 | 0.37 | 0.497 |        |        | 2.149 | 0.37 | 0.537 |        |        |
| Fe7-S4B | 2.351 | 2.12 | 0.37 | 0.536 |        |        | 2.149 | 0.37 | 0.579 |        |        |
| Fe7-SG  | 2.311 | 2.12 | 0.37 | 0.597 | 2.141  | 0.141  | 2.149 | 0.37 | 0.645 | 2.315  | -0.685 |
| Fe8-S1  | 2.411 | 2.12 | 0.37 | 0.455 |        |        | 2.149 | 0.37 | 0.493 |        |        |
| Fe8-S3B | 2.351 | 2.12 | 0.37 | 0.536 |        |        | 2.149 | 0.37 | 0.579 |        |        |
| Fe8-S4B | 2.320 | 2.12 | 0.37 | 0.582 |        |        | 2.149 | 0.37 | 0.630 |        |        |
| Fe8-SG  | 2.273 | 2.12 | 0.37 | 0.661 | 2.235  | 0.235  | 2.149 | 0.37 | 0.715 | 2.417  | -0.583 |
|         |       |      |      |       | 17.738 |        |       |      |       | 19.184 |        |

---

**Table S28** The adopted bond valence analyses for irons in P-cluster from MoFe protein 1L5H which was reported as P<sup>N</sup> at 2.3 Å resolution.

| Bond                  | $r_{ij}$ (Å) | $R_0$ (Å) | B (Å) | Bval  | Sum   | Diff.                 | $R_0$ (Å) | B (Å) | Bval  | Sum   | Diff.  |
|-----------------------|--------------|-----------|-------|-------|-------|-----------------------|-----------|-------|-------|-------|--------|
| expected valence = +2 |              |           |       |       |       | expected valence = +3 |           |       |       |       |        |
| Fe1-S1                | 2.264        | 2.120     | 0.370 | 0.678 |       |                       | 2.149     | 0.370 | 0.733 |       |        |
| Fe1-S2A               | 2.146        | 2.120     | 0.370 | 0.932 |       |                       | 2.149     | 0.370 | 1.008 |       |        |
| Fe1-S3A               | 2.248        | 2.120     | 0.370 | 0.708 |       |                       | 2.149     | 0.370 | 0.765 |       |        |
| Fe1-SG                | 2.378        | 2.120     | 0.370 | 0.498 | 2.815 | 0.815                 | 2.149     | 0.370 | 0.539 | 3.045 | 0.045  |
| Fe2-S1                | 2.330        | 2.120     | 0.370 | 0.567 |       |                       | 2.149     | 0.370 | 0.613 |       |        |
| Fe2-S2A               | 2.198        | 2.120     | 0.370 | 0.810 |       |                       | 2.149     | 0.370 | 0.876 |       |        |
| Fe2-S4A               | 2.308        | 2.120     | 0.370 | 0.602 |       |                       | 2.149     | 0.370 | 0.651 |       |        |
| Fe2-SG                | 2.326        | 2.120     | 0.370 | 0.573 | 2.552 | 0.552                 | 2.149     | 0.370 | 0.620 | 2.760 | -0.240 |
| Fe3-S2A               | 2.364        | 2.120     | 0.370 | 0.517 |       |                       | 2.149     | 0.370 | 0.559 |       |        |
| Fe3-S3A               | 2.287        | 2.120     | 0.370 | 0.637 |       |                       | 2.149     | 0.370 | 0.689 |       |        |
| Fe3-S4A               | 2.239        | 2.120     | 0.370 | 0.725 |       |                       | 2.149     | 0.370 | 0.784 |       |        |
| Fe3-SG                | 2.385        | 2.120     | 0.370 | 0.489 | 2.367 | 0.367                 | 2.149     | 0.370 | 0.528 | 2.560 | -0.440 |
| Fe4-S1                | 2.328        | 2.120     | 0.370 | 0.570 |       |                       | 2.149     | 0.370 | 0.616 |       |        |
| Fe4-S3A               | 2.286        | 2.120     | 0.370 | 0.638 |       |                       | 2.149     | 0.370 | 0.691 |       |        |
| Fe4-S4A               | 2.297        | 2.120     | 0.370 | 0.620 |       |                       | 2.149     | 0.370 | 0.670 |       |        |



|         |       |       |       |       |        |        |       |       |       |        |        |
|---------|-------|-------|-------|-------|--------|--------|-------|-------|-------|--------|--------|
| Fe4-SG  | 2.400 | 2.120 | 0.370 | 0.469 | 2.297  | 0.297  | 2.149 | 0.370 | 0.507 | 2.485  | -0.515 |
| Fe5-S1  | 2.359 | 2.120 | 0.370 | 0.524 |        |        | 2.149 | 0.370 | 0.567 |        |        |
| Fe5-S2B | 2.311 | 2.120 | 0.370 | 0.597 |        |        | 2.149 | 0.370 | 0.645 |        |        |
| Fe5-S4B | 2.254 | 2.120 | 0.370 | 0.696 |        |        | 2.149 | 0.370 | 0.753 |        |        |
| Fe5-SG  | 2.423 | 2.120 | 0.370 | 0.441 | 2.258  | 0.258  | 2.149 | 0.370 | 0.477 | 2.442  | -0.558 |
| Fe6-S1  | 2.732 | 2.120 | 0.370 | 0.191 |        |        | 2.149 | 0.370 | 0.207 |        |        |
| Fe6-S2B | 2.349 | 2.120 | 0.370 | 0.539 |        |        | 2.149 | 0.370 | 0.582 |        |        |
| Fe6-S3B | 2.261 | 2.120 | 0.370 | 0.683 |        |        | 2.149 | 0.370 | 0.739 |        |        |
| Fe6-SG  | 2.488 | 2.120 | 0.370 | 0.370 | 1.783  | -0.217 | 2.149 | 0.370 | 0.400 | 1.928  | -1.072 |
| Fe7-S2B | 2.293 | 2.120 | 0.370 | 0.627 |        |        | 2.149 | 0.370 | 0.678 |        |        |
| Fe7-S3B | 2.291 | 2.120 | 0.370 | 0.630 |        |        | 2.149 | 0.370 | 0.681 |        |        |
| Fe7-S4B | 2.290 | 2.120 | 0.370 | 0.632 |        |        | 2.149 | 0.370 | 0.683 |        |        |
| Fe7-SG  | 2.278 | 2.120 | 0.370 | 0.652 | 2.541  | 0.541  | 2.149 | 0.370 | 0.706 | 2.748  | -0.252 |
| Fe8-S1  | 2.369 | 2.120 | 0.370 | 0.510 |        |        | 2.149 | 0.370 | 0.552 |        |        |
| Fe8-S3B | 2.300 | 2.120 | 0.370 | 0.615 |        |        | 2.149 | 0.370 | 0.665 |        |        |
| Fe8-S4B | 2.287 | 2.120 | 0.370 | 0.637 |        |        | 2.149 | 0.370 | 0.689 |        |        |
| Fe8-SG  | 2.285 | 2.120 | 0.370 | 0.640 | 2.402  | 0.402  | 2.149 | 0.370 | 0.692 | 2.598  | -0.402 |
|         |       |       |       |       | 19.015 |        |       |       |       | 20.565 |        |

---

**Table S29** The adopted bond valence analyses for irons in P-cluster [1] from MoFe protein 1M1N which was reported as P<sup>N</sup> at 1.16Å resolution.

| Bond                  | $r_{ij}$ (Å) | $R_0$ (Å) | B (Å) | Bval  | Sum   | Diff.                 | $R_0$ (Å) | B (Å) | Bval  | Sum   | Diff.  |
|-----------------------|--------------|-----------|-------|-------|-------|-----------------------|-----------|-------|-------|-------|--------|
| expected valence = +2 |              |           |       |       |       | expected valence = +3 |           |       |       |       |        |
| Fe1-S1                | 2.483        | 2.12      | 0.37  | 0.375 |       |                       | 2.149     | 0.37  | 0.405 |       |        |
| Fe1-S2A               | 2.286        | 2.12      | 0.37  | 0.638 |       |                       | 2.149     | 0.37  | 0.691 |       |        |
| Fe1-S3A               | 2.281        | 2.12      | 0.37  | 0.647 |       |                       | 2.149     | 0.37  | 0.700 |       |        |
| Fe1-SG                | 2.350        | 2.12      | 0.37  | 0.537 | 2.198 | 0.198                 | 2.149     | 0.37  | 0.581 | 2.377 | -0.623 |
| Fe2-S1                | 2.446        | 2.12      | 0.37  | 0.414 |       |                       | 2.149     | 0.37  | 0.448 |       |        |
| Fe2-S2A               | 2.313        | 2.12      | 0.37  | 0.594 |       |                       | 2.149     | 0.37  | 0.642 |       |        |
| Fe2-S4A               | 2.316        | 2.12      | 0.37  | 0.589 |       |                       | 2.149     | 0.37  | 0.637 |       |        |
| Fe2-SG                | 2.309        | 2.12      | 0.37  | 0.600 | 2.197 | 0.197                 | 2.149     | 0.37  | 0.649 | 2.376 | -0.624 |
| Fe3-S2A               | 2.319        | 2.12      | 0.37  | 0.584 |       |                       | 2.149     | 0.37  | 0.632 |       |        |
| Fe3-S3A               | 2.278        | 2.12      | 0.37  | 0.652 |       |                       | 2.149     | 0.37  | 0.706 |       |        |
| Fe3-S4A               | 2.337        | 2.12      | 0.37  | 0.556 |       |                       | 2.149     | 0.37  | 0.602 |       |        |
| Fe3-SG                | 2.289        | 2.12      | 0.37  | 0.633 | 2.426 | 0.426                 | 2.149     | 0.37  | 0.685 | 2.624 | -0.376 |
| Fe4-S1                | 2.401        | 2.12      | 0.37  | 0.468 |       |                       | 2.149     | 0.37  | 0.506 |       |        |
| Fe4-S3A               | 2.269        | 2.12      | 0.37  | 0.669 |       |                       | 2.149     | 0.37  | 0.723 |       |        |
| Fe4-S4A               | 2.266        | 2.12      | 0.37  | 0.674 |       |                       | 2.149     | 0.37  | 0.729 |       |        |

|         |       |      |      |       |        |       |       |      |       |        |        |
|---------|-------|------|------|-------|--------|-------|-------|------|-------|--------|--------|
| Fe4-SG  | 2.339 | 2.12 | 0.37 | 0.553 | 2.364  | 0.364 | 2.149 | 0.37 | 0.598 | 2.556  | -0.444 |
| Fe5-S1  | 2.426 | 2.12 | 0.37 | 0.437 |        |       | 2.149 | 0.37 | 0.473 |        |        |
| Fe5-S2B | 2.296 | 2.12 | 0.37 | 0.621 |        |       | 2.149 | 0.37 | 0.672 |        |        |
| Fe5-S4B | 2.278 | 2.12 | 0.37 | 0.652 |        |       | 2.149 | 0.37 | 0.706 |        |        |
| Fe5-SG  | 2.384 | 2.12 | 0.37 | 0.490 | 2.201  | 0.201 | 2.149 | 0.37 | 0.530 | 2.381  | -0.619 |
| Fe6-S1  | 2.453 | 2.12 | 0.37 | 0.407 |        |       | 2.149 | 0.37 | 0.440 |        |        |
| Fe6-S2B | 2.349 | 2.12 | 0.37 | 0.539 |        |       | 2.149 | 0.37 | 0.582 |        |        |
| Fe6-S3B | 2.348 | 2.12 | 0.37 | 0.540 |        |       | 2.149 | 0.37 | 0.584 |        |        |
| Fe6-SG  | 2.313 | 2.12 | 0.37 | 0.594 | 2.079  | 0.079 | 2.149 | 0.37 | 0.642 | 2.248  | -0.752 |
| Fe7-S2B | 2.341 | 2.12 | 0.37 | 0.550 |        |       | 2.149 | 0.37 | 0.595 |        |        |
| Fe7-S3B | 2.351 | 2.12 | 0.37 | 0.536 |        |       | 2.149 | 0.37 | 0.579 |        |        |
| Fe7-S4B | 2.314 | 2.12 | 0.37 | 0.592 |        |       | 2.149 | 0.37 | 0.640 |        |        |
| Fe7-SG  | 2.307 | 2.12 | 0.37 | 0.603 | 2.281  | 0.281 | 2.149 | 0.37 | 0.652 | 2.467  | -0.533 |
| Fe8-S1  | 2.435 | 2.12 | 0.37 | 0.427 |        |       | 2.149 | 0.37 | 0.462 |        |        |
| Fe8-S3B | 2.280 | 2.12 | 0.37 | 0.649 |        |       | 2.149 | 0.37 | 0.702 |        |        |
| Fe8-S4B | 2.277 | 2.12 | 0.37 | 0.654 |        |       | 2.149 | 0.37 | 0.708 |        |        |
| Fe8-SG  | 2.329 | 2.12 | 0.37 | 0.568 | 2.298  | 0.298 | 2.149 | 0.37 | 0.615 | 2.486  | -0.514 |
|         |       |      |      |       | 18.043 |       |       |      |       | 19.515 |        |

---

**Table S30** The adopted bond valence analyses for irons in P-cluster [2] from MoFe protein 1M1N which was reported as P<sup>N</sup> at 1.16 Å resolution.

| Bond                  | $r_{ij}$ (Å) | $R_0$ (Å) | B (Å) | Bval  | Sum   | Diff.                 | $R_0$ (Å) | B (Å) | Bval  | Sum   | Diff.  |
|-----------------------|--------------|-----------|-------|-------|-------|-----------------------|-----------|-------|-------|-------|--------|
| expected valence = +2 |              |           |       |       |       | expected valence = +3 |           |       |       |       |        |
| Fe1-S1                | 2.483        | 2.120     | 0.370 | 0.375 |       |                       | 2.149     | 0.370 | 0.405 |       |        |
| Fe1-S2A               | 2.283        | 2.120     | 0.370 | 0.644 |       |                       | 2.149     | 0.370 | 0.696 |       |        |
| Fe1-S3A               | 2.270        | 2.120     | 0.370 | 0.667 |       |                       | 2.149     | 0.370 | 0.721 |       |        |
| Fe1-SG                | 2.348        | 2.120     | 0.370 | 0.540 | 2.225 | 0.225                 | 2.149     | 0.370 | 0.584 | 2.407 | -0.593 |
| Fe2-S1                | 2.438        | 2.120     | 0.370 | 0.423 |       |                       | 2.149     | 0.370 | 0.458 |       |        |
| Fe2-S2A               | 2.305        | 2.120     | 0.370 | 0.607 |       |                       | 2.149     | 0.370 | 0.656 |       |        |
| Fe2-S4A               | 2.321        | 2.120     | 0.370 | 0.581 |       |                       | 2.149     | 0.370 | 0.628 |       |        |
| Fe2-SG                | 2.295        | 2.120     | 0.370 | 0.623 | 2.234 | 0.234                 | 2.149     | 0.370 | 0.674 | 2.416 | -0.584 |
| Fe3-S2A               | 2.318        | 2.120     | 0.370 | 0.586 |       |                       | 2.149     | 0.370 | 0.633 |       |        |
| Fe3-S3A               | 2.267        | 2.120     | 0.370 | 0.672 |       |                       | 2.149     | 0.370 | 0.727 |       |        |
| Fe3-S4A               | 2.356        | 2.120     | 0.370 | 0.528 |       |                       | 2.149     | 0.370 | 0.572 |       |        |
| Fe3-SG                | 2.295        | 2.120     | 0.370 | 0.623 | 2.409 | 0.409                 | 2.149     | 0.370 | 0.674 | 2.606 | -0.394 |
| Fe4-S1                | 2.392        | 2.120     | 0.370 | 0.479 |       |                       | 2.149     | 0.370 | 0.519 |       |        |
| Fe4-S3A               | 2.256        | 2.120     | 0.370 | 0.692 |       |                       | 2.149     | 0.370 | 0.749 |       |        |
| Fe4-S4A               | 2.296        | 2.120     | 0.370 | 0.621 |       |                       | 2.149     | 0.370 | 0.672 |       |        |

|         |       |       |       |       |        |       |       |       |       |        |        |
|---------|-------|-------|-------|-------|--------|-------|-------|-------|-------|--------|--------|
| Fe4-SG  | 2.320 | 2.120 | 0.370 | 0.582 | 2.376  | 0.376 | 2.149 | 0.370 | 0.630 | 2.569  | -0.431 |
| Fe5-S1  | 2.426 | 2.120 | 0.370 | 0.437 |        |       | 2.149 | 0.370 | 0.473 |        |        |
| Fe5-S2B | 2.315 | 2.120 | 0.370 | 0.590 |        |       | 2.149 | 0.370 | 0.638 |        |        |
| Fe5-S4B | 2.285 | 2.120 | 0.370 | 0.640 |        |       | 2.149 | 0.370 | 0.692 |        |        |
| Fe5-SG  | 2.366 | 2.120 | 0.370 | 0.514 | 2.182  | 0.182 | 2.149 | 0.370 | 0.556 | 2.360  | -0.640 |
| Fe6-S1  | 2.459 | 2.120 | 0.370 | 0.400 |        |       | 2.149 | 0.370 | 0.433 |        |        |
| Fe6-S2B | 2.343 | 2.120 | 0.370 | 0.547 |        |       | 2.149 | 0.370 | 0.592 |        |        |
| Fe6-S3B | 2.329 | 2.120 | 0.370 | 0.568 |        |       | 2.149 | 0.370 | 0.615 |        |        |
| Fe6-SG  | 2.320 | 2.120 | 0.370 | 0.582 | 2.098  | 0.098 | 2.149 | 0.370 | 0.630 | 2.269  | -0.731 |
| Fe7-S2B | 2.347 | 2.120 | 0.370 | 0.541 |        |       | 2.149 | 0.370 | 0.586 |        |        |
| Fe7-S3B | 2.331 | 2.120 | 0.370 | 0.565 |        |       | 2.149 | 0.370 | 0.611 |        |        |
| Fe7-S4B | 2.315 | 2.120 | 0.370 | 0.590 |        |       | 2.149 | 0.370 | 0.638 |        |        |
| Fe7-SG  | 2.347 | 2.120 | 0.370 | 0.541 | 2.239  | 0.239 | 2.149 | 0.370 | 0.586 | 2.421  | -0.579 |
| Fe8-S1  | 2.444 | 2.120 | 0.370 | 0.417 |        |       | 2.149 | 0.370 | 0.451 |        |        |
| Fe8-S3B | 2.315 | 2.120 | 0.370 | 0.590 |        |       | 2.149 | 0.370 | 0.638 |        |        |
| Fe8-S4B | 2.266 | 2.120 | 0.370 | 0.674 |        |       | 2.149 | 0.370 | 0.729 |        |        |
| Fe8-SG  | 2.301 | 2.120 | 0.370 | 0.613 | 2.294  | 0.294 | 2.149 | 0.370 | 0.663 | 2.481  | -0.519 |
|         |       |       |       |       | 18.057 |       |       |       |       | 19.530 |        |

---

**Table S31** The adopted bond valence analyses for irons in P-cluster [3] from MoFe protein 1M1N which was reported as P<sup>N</sup> at 1.16 Å resolution.

| Bond                  | $r_{ij}$ (Å) | $R_0$ (Å) | B (Å) | Bval  | Sum   | Diff.                 | $R_0$ (Å) | B (Å) | Bval  | Sum   | Diff.  |
|-----------------------|--------------|-----------|-------|-------|-------|-----------------------|-----------|-------|-------|-------|--------|
| expected valence = +2 |              |           |       |       |       | expected valence = +3 |           |       |       |       |        |
| Fe1-S1                | 2.488        | 2.120     | 0.370 | 0.370 |       |                       | 2.149     | 0.370 | 0.400 |       |        |
| Fe1-S2A               | 2.271        | 2.120     | 0.370 | 0.665 |       |                       | 2.149     | 0.370 | 0.719 |       |        |
| Fe1-S3A               | 2.288        | 2.120     | 0.370 | 0.635 |       |                       | 2.149     | 0.370 | 0.687 |       |        |
| Fe1-SG                | 2.347        | 2.120     | 0.370 | 0.541 | 2.211 | 0.211                 | 2.149     | 0.370 | 0.586 | 2.392 | -0.608 |
| Fe2-S1                | 2.450        | 2.120     | 0.370 | 0.410 |       |                       | 2.149     | 0.370 | 0.443 |       |        |
| Fe2-S2A               | 2.309        | 2.120     | 0.370 | 0.600 |       |                       | 2.149     | 0.370 | 0.649 |       |        |
| Fe2-S4A               | 2.309        | 2.120     | 0.370 | 0.600 |       |                       | 2.149     | 0.370 | 0.649 |       |        |
| Fe2-SG                | 2.313        | 2.120     | 0.370 | 0.594 | 2.203 | 0.203                 | 2.149     | 0.370 | 0.642 | 2.383 | -0.617 |
| Fe3-S2A               | 2.321        | 2.120     | 0.370 | 0.581 |       |                       | 2.149     | 0.370 | 0.628 |       |        |
| Fe3-S3A               | 2.268        | 2.120     | 0.370 | 0.670 |       |                       | 2.149     | 0.370 | 0.725 |       |        |
| Fe3-S4A               | 2.331        | 2.120     | 0.370 | 0.565 |       |                       | 2.149     | 0.370 | 0.611 |       |        |
| Fe3-SG                | 2.295        | 2.120     | 0.370 | 0.623 | 2.440 | 0.440                 | 2.149     | 0.370 | 0.674 | 2.639 | -0.361 |
| Fe4-S1                | 2.401        | 2.120     | 0.370 | 0.468 |       |                       | 2.149     | 0.370 | 0.506 |       |        |
| Fe4-S3A               | 2.283        | 2.120     | 0.370 | 0.644 |       |                       | 2.149     | 0.370 | 0.696 |       |        |
| Fe4-S4A               | 2.270        | 2.120     | 0.370 | 0.667 |       |                       | 2.149     | 0.370 | 0.721 |       |        |

|         |       |       |       |       |        |       |       |       |       |        |        |
|---------|-------|-------|-------|-------|--------|-------|-------|-------|-------|--------|--------|
| Fe4-SG  | 2.336 | 2.120 | 0.370 | 0.558 | 2.336  | 0.336 | 2.149 | 0.370 | 0.603 | 2.527  | -0.473 |
| Fe5-S1  | 2.427 | 2.120 | 0.370 | 0.436 |        |       | 2.149 | 0.370 | 0.472 |        |        |
| Fe5-S2B | 2.282 | 2.120 | 0.370 | 0.645 |        |       | 2.149 | 0.370 | 0.698 |        |        |
| Fe5-S4B | 2.275 | 2.120 | 0.370 | 0.658 |        |       | 2.149 | 0.370 | 0.711 |        |        |
| Fe5-SG  | 2.378 | 2.120 | 0.370 | 0.498 | 2.237  | 0.237 | 2.149 | 0.370 | 0.539 | 2.420  | -0.580 |
| Fe6-S1  | 2.444 | 2.120 | 0.370 | 0.417 |        |       | 2.149 | 0.370 | 0.451 |        |        |
| Fe6-S2B | 2.340 | 2.120 | 0.370 | 0.552 |        |       | 2.149 | 0.370 | 0.597 |        |        |
| Fe6-S3B | 2.355 | 2.120 | 0.370 | 0.530 |        |       | 2.149 | 0.370 | 0.573 |        |        |
| Fe6-SG  | 2.304 | 2.120 | 0.370 | 0.608 | 2.106  | 0.106 | 2.149 | 0.370 | 0.658 | 2.278  | -0.722 |
| Fe7-S2B | 2.341 | 2.120 | 0.370 | 0.550 |        |       | 2.149 | 0.370 | 0.595 |        |        |
| Fe7-S3B | 2.343 | 2.120 | 0.370 | 0.547 |        |       | 2.149 | 0.370 | 0.592 |        |        |
| Fe7-S4B | 2.313 | 2.120 | 0.370 | 0.594 |        |       | 2.149 | 0.370 | 0.642 |        |        |
| Fe7-SG  | 2.299 | 2.120 | 0.370 | 0.616 | 2.308  | 0.308 | 2.149 | 0.370 | 0.667 | 2.496  | -0.504 |
| Fe8-S1  | 2.430 | 2.120 | 0.370 | 0.433 |        |       | 2.149 | 0.370 | 0.468 |        |        |
| Fe8-S3B | 2.290 | 2.120 | 0.370 | 0.632 |        |       | 2.149 | 0.370 | 0.683 |        |        |
| Fe8-S4B | 2.282 | 2.120 | 0.370 | 0.645 |        |       | 2.149 | 0.370 | 0.698 |        |        |
| Fe8-SG  | 2.331 | 2.120 | 0.370 | 0.565 | 2.275  | 0.275 | 2.149 | 0.370 | 0.611 | 2.461  | -0.539 |
|         |       |       |       |       | 18.117 |       |       |       |       | 19.594 |        |

---

**Table S32** The adopted bond valence analyses for irons in P-cluster [4] from MoFe protein 1M1N which was reported as P<sup>N</sup> at 1.16 Å resolution.

| Bond                  | $r_{ij}$ (Å) | $R_0$ (Å) | B (Å) | Bval  | Sum   | Diff.                 | $R_0$ (Å) | B (Å) | Bval  | Sum   | Diff.  |
|-----------------------|--------------|-----------|-------|-------|-------|-----------------------|-----------|-------|-------|-------|--------|
| expected valence = +2 |              |           |       |       |       | expected valence = +3 |           |       |       |       |        |
| Fe1-S1                | 2.493        | 2.120     | 0.370 | 0.365 |       |                       | 2.149     | 0.370 | 0.395 |       |        |
| Fe1-S2A               | 2.278        | 2.120     | 0.370 | 0.652 |       |                       | 2.149     | 0.370 | 0.706 |       |        |
| Fe1-S3A               | 2.269        | 2.120     | 0.370 | 0.669 |       |                       | 2.149     | 0.370 | 0.723 |       |        |
| Fe1-SG                | 2.338        | 2.120     | 0.370 | 0.555 | 2.241 | 0.241                 | 2.149     | 0.370 | 0.600 | 2.423 | -0.577 |
| Fe2-S1                | 2.440        | 2.120     | 0.370 | 0.421 |       |                       | 2.149     | 0.370 | 0.455 |       |        |
| Fe2-S2A               | 2.287        | 2.120     | 0.370 | 0.637 |       |                       | 2.149     | 0.370 | 0.689 |       |        |
| Fe2-S4A               | 2.317        | 2.120     | 0.370 | 0.587 |       |                       | 2.149     | 0.370 | 0.635 |       |        |
| Fe2-SG                | 2.300        | 2.120     | 0.370 | 0.615 | 2.260 | 0.260                 | 2.149     | 0.370 | 0.665 | 2.444 | -0.556 |
| Fe3-S2A               | 2.311        | 2.120     | 0.370 | 0.597 |       |                       | 2.149     | 0.370 | 0.645 |       |        |
| Fe3-S3A               | 2.270        | 2.120     | 0.370 | 0.667 |       |                       | 2.149     | 0.370 | 0.721 |       |        |
| Fe3-S4A               | 2.345        | 2.120     | 0.370 | 0.544 |       |                       | 2.149     | 0.370 | 0.589 |       |        |
| Fe3-SG                | 2.266        | 2.120     | 0.370 | 0.674 | 2.482 | 0.482                 | 2.149     | 0.370 | 0.729 | 2.684 | -0.316 |
| Fe4-S1                | 2.393        | 2.120     | 0.370 | 0.478 |       |                       | 2.149     | 0.370 | 0.517 |       |        |
| Fe4-S3A               | 2.264        | 2.120     | 0.370 | 0.678 |       |                       | 2.149     | 0.370 | 0.733 |       |        |
| Fe4-S4A               | 2.289        | 2.120     | 0.370 | 0.633 |       |                       | 2.149     | 0.370 | 0.685 |       |        |



|         |       |       |       |       |        |       |       |       |       |        |        |
|---------|-------|-------|-------|-------|--------|-------|-------|-------|-------|--------|--------|
| Fe4-SG  | 2.307 | 2.120 | 0.370 | 0.603 | 2.392  | 0.392 | 2.149 | 0.370 | 0.652 | 2.587  | -0.413 |
| Fe5-S1  | 2.441 | 2.120 | 0.370 | 0.420 |        |       | 2.149 | 0.370 | 0.454 |        |        |
| Fe5-S2B | 2.316 | 2.120 | 0.370 | 0.589 |        |       | 2.149 | 0.370 | 0.637 |        |        |
| Fe5-S4B | 2.277 | 2.120 | 0.370 | 0.654 |        |       | 2.149 | 0.370 | 0.708 |        |        |
| Fe5-SG  | 2.355 | 2.120 | 0.370 | 0.530 | 2.193  | 0.193 | 2.149 | 0.370 | 0.573 | 2.372  | -0.628 |
| Fe6-S1  | 2.455 | 2.120 | 0.370 | 0.404 |        |       | 2.149 | 0.370 | 0.437 |        |        |
| Fe6-S2B | 2.346 | 2.120 | 0.370 | 0.543 |        |       | 2.149 | 0.370 | 0.587 |        |        |
| Fe6-S3B | 2.333 | 2.120 | 0.370 | 0.562 |        |       | 2.149 | 0.370 | 0.608 |        |        |
| Fe6-SG  | 2.325 | 2.120 | 0.370 | 0.575 | 2.084  | 0.084 | 2.149 | 0.370 | 0.621 | 2.254  | -0.746 |
| Fe7-S2B | 2.364 | 2.120 | 0.370 | 0.517 |        |       | 2.149 | 0.370 | 0.559 |        |        |
| Fe7-S3B | 2.329 | 2.120 | 0.370 | 0.568 |        |       | 2.149 | 0.370 | 0.615 |        |        |
| Fe7-S4B | 2.316 | 2.120 | 0.370 | 0.589 |        |       | 2.149 | 0.370 | 0.637 |        |        |
| Fe7-SG  | 2.322 | 2.120 | 0.370 | 0.579 | 2.254  | 0.254 | 2.149 | 0.370 | 0.627 | 2.437  | -0.563 |
| Fe8-S1  | 2.451 | 2.120 | 0.370 | 0.409 |        |       | 2.149 | 0.370 | 0.442 |        |        |
| Fe8-S3B | 2.311 | 2.120 | 0.370 | 0.597 |        |       | 2.149 | 0.370 | 0.645 |        |        |
| Fe8-S4B | 2.278 | 2.120 | 0.370 | 0.652 |        |       | 2.149 | 0.370 | 0.706 |        |        |
| Fe8-SG  | 2.288 | 2.120 | 0.370 | 0.635 | 2.293  | 0.293 | 2.149 | 0.370 | 0.687 | 2.480  | -0.520 |
|         |       |       |       |       | 18.198 |       |       |       |       | 19.682 |        |

---

**Table S33** The adopted bond valence analyses for irons in P-cluster [1] from MoFe protein 1M34 which was reported as P<sup>N</sup> at 2.3 Å resolution.

| Bond                  | $r_{ij}$ (Å) | $R_0$ (Å) | B (Å) | Bval  | Sum   | Diff.                 | $R_0$ (Å) | B (Å) | Bval  | Sum   | Diff.  |
|-----------------------|--------------|-----------|-------|-------|-------|-----------------------|-----------|-------|-------|-------|--------|
| expected valence = +2 |              |           |       |       |       | expected valence = +3 |           |       |       |       |        |
| Fe1-S1                | 2.312        | 2.120     | 0.370 | 0.595 |       |                       | 2.149     | 0.370 | 0.644 |       |        |
| Fe1-S2A               | 2.285        | 2.120     | 0.370 | 0.640 |       |                       | 2.149     | 0.370 | 0.692 |       |        |
| Fe1-S3A               | 2.307        | 2.120     | 0.370 | 0.603 |       |                       | 2.149     | 0.370 | 0.652 |       |        |
| Fe1-SG                | 2.386        | 2.120     | 0.370 | 0.487 | 2.326 | 0.326                 | 2.149     | 0.370 | 0.527 | 2.516 | -0.484 |
| Fe2-S1                | 2.364        | 2.120     | 0.370 | 0.517 |       |                       | 2.149     | 0.370 | 0.559 |       |        |
| Fe2-S2A               | 2.314        | 2.120     | 0.370 | 0.592 |       |                       | 2.149     | 0.370 | 0.640 |       |        |
| Fe2-S4A               | 2.283        | 2.120     | 0.370 | 0.644 |       |                       | 2.149     | 0.370 | 0.696 |       |        |
| Fe2-SG                | 2.232        | 2.120     | 0.370 | 0.739 | 2.492 | 0.492                 | 2.149     | 0.370 | 0.799 | 2.695 | -0.305 |
| Fe3-S2A               | 2.304        | 2.120     | 0.370 | 0.608 |       |                       | 2.149     | 0.370 | 0.658 |       |        |
| Fe3-S3A               | 2.248        | 2.120     | 0.370 | 0.708 |       |                       | 2.149     | 0.370 | 0.765 |       |        |
| Fe3-S4A               | 2.339        | 2.120     | 0.370 | 0.553 |       |                       | 2.149     | 0.370 | 0.598 |       |        |
| Fe3-SG                | 2.302        | 2.120     | 0.370 | 0.611 | 2.480 | 0.480                 | 2.149     | 0.370 | 0.661 | 2.683 | -0.317 |
| Fe4-S1                | 2.292        | 2.120     | 0.370 | 0.628 |       |                       | 2.149     | 0.370 | 0.679 |       |        |
| Fe4-S3A               | 2.330        | 2.120     | 0.370 | 0.567 |       |                       | 2.149     | 0.370 | 0.613 |       |        |
| Fe4-S4A               | 2.267        | 2.120     | 0.370 | 0.672 |       |                       | 2.149     | 0.370 | 0.727 |       |        |

|         |       |       |       |       |        |        |       |       |       |        |        |
|---------|-------|-------|-------|-------|--------|--------|-------|-------|-------|--------|--------|
| Fe4-SG  | 2.310 | 2.120 | 0.370 | 0.598 | 2.466  | 0.466  | 2.149 | 0.370 | 0.647 | 2.667  | -0.333 |
| Fe5-S1  | 2.499 | 2.120 | 0.370 | 0.359 |        |        | 2.149 | 0.370 | 0.388 |        |        |
| Fe5-S2B | 2.294 | 2.120 | 0.370 | 0.625 |        |        | 2.149 | 0.370 | 0.676 |        |        |
| Fe5-S4B | 2.299 | 2.120 | 0.370 | 0.616 |        |        | 2.149 | 0.370 | 0.667 |        |        |
| Fe5-SG  | 2.241 | 2.120 | 0.370 | 0.721 | 2.321  | 0.321  | 2.149 | 0.370 | 0.780 | 2.511  | -0.489 |
| Fe6-S1  | 2.849 | 2.120 | 0.370 | 0.139 |        |        | 2.149 | 0.370 | 0.151 |        |        |
| Fe6-S2B | 2.282 | 2.120 | 0.370 | 0.645 |        |        | 2.149 | 0.370 | 0.698 |        |        |
| Fe6-S3B | 2.290 | 2.120 | 0.370 | 0.632 |        |        | 2.149 | 0.370 | 0.683 |        |        |
| Fe6-SG  | 2.326 | 2.120 | 0.370 | 0.573 | 1.990  | -0.010 | 2.149 | 0.370 | 0.620 | 2.152  | -0.848 |
| Fe7-S2B | 2.312 | 2.120 | 0.370 | 0.595 |        |        | 2.149 | 0.370 | 0.644 |        |        |
| Fe7-S3B | 2.269 | 2.120 | 0.370 | 0.669 |        |        | 2.149 | 0.370 | 0.723 |        |        |
| Fe7-S4B | 2.342 | 2.120 | 0.370 | 0.549 |        |        | 2.149 | 0.370 | 0.594 |        |        |
| Fe7-SG  | 2.332 | 2.120 | 0.370 | 0.564 | 2.376  | 0.376  | 2.149 | 0.370 | 0.610 | 2.570  | -0.430 |
| Fe8-S1  | 2.359 | 2.120 | 0.370 | 0.524 |        |        | 2.149 | 0.370 | 0.567 |        |        |
| Fe8-S3B | 2.319 | 2.120 | 0.370 | 0.584 |        |        | 2.149 | 0.370 | 0.632 |        |        |
| Fe8-S4B | 2.265 | 2.120 | 0.370 | 0.676 |        |        | 2.149 | 0.370 | 0.731 |        |        |
| Fe8-SG  | 2.254 | 2.120 | 0.370 | 0.696 | 2.480  | 0.480  | 2.149 | 0.370 | 0.753 | 2.682  | -0.318 |
|         |       |       |       |       | 18.931 |        |       |       |       | 20.474 |        |

---

**Table S34** The adopted bond valence analyses for irons in P-cluster [2] from MoFe protein 1M34 which was reported as P<sup>N</sup> at 2.3 Å resolution.

| Bond                  | $r_{ij}$ (Å) | $R_0$ (Å) | B (Å) | Bval  | Sum   | Diff.                 | $R_0$ (Å) | B (Å) | Bval  | Sum   | Diff.  |
|-----------------------|--------------|-----------|-------|-------|-------|-----------------------|-----------|-------|-------|-------|--------|
| expected valence = +2 |              |           |       |       |       | expected valence = +3 |           |       |       |       |        |
| Fe1-S1                | 2.317        | 2.120     | 0.370 | 0.587 |       |                       | 2.149     | 0.370 | 0.635 |       |        |
| Fe1-S2A               | 2.251        | 2.120     | 0.370 | 0.702 |       |                       | 2.149     | 0.370 | 0.759 |       |        |
| Fe1-S3A               | 2.312        | 2.120     | 0.370 | 0.595 |       |                       | 2.149     | 0.370 | 0.644 |       |        |
| Fe1-SG                | 2.295        | 2.120     | 0.370 | 0.623 | 2.507 | 0.507                 | 2.149     | 0.370 | 0.674 | 2.712 | -0.288 |
| Fe2-S1                | 2.344        | 2.120     | 0.370 | 0.546 |       |                       | 2.149     | 0.370 | 0.590 |       |        |
| Fe2-S2A               | 2.313        | 2.120     | 0.370 | 0.594 |       |                       | 2.149     | 0.370 | 0.642 |       |        |
| Fe2-S4A               | 2.306        | 2.120     | 0.370 | 0.605 |       |                       | 2.149     | 0.370 | 0.654 |       |        |
| Fe2-SG                | 2.209        | 2.120     | 0.370 | 0.786 | 2.531 | 0.531                 | 2.149     | 0.370 | 0.850 | 2.737 | -0.263 |
| Fe3-S2A               | 2.302        | 2.120     | 0.370 | 0.611 |       |                       | 2.149     | 0.370 | 0.661 |       |        |
| Fe3-S3A               | 2.268        | 2.120     | 0.370 | 0.670 |       |                       | 2.149     | 0.370 | 0.725 |       |        |
| Fe3-S4A               | 2.330        | 2.120     | 0.370 | 0.567 |       |                       | 2.149     | 0.370 | 0.613 |       |        |
| Fe3-SG                | 2.230        | 2.120     | 0.370 | 0.743 | 2.592 | 0.592                 | 2.149     | 0.370 | 0.803 | 2.803 | -0.197 |
| Fe4-S1                | 2.315        | 2.120     | 0.370 | 0.590 |       |                       | 2.149     | 0.370 | 0.638 |       |        |
| Fe4-S3A               | 2.311        | 2.120     | 0.370 | 0.597 |       |                       | 2.149     | 0.370 | 0.645 |       |        |
| Fe4-S4A               | 2.263        | 2.120     | 0.370 | 0.679 |       |                       | 2.149     | 0.370 | 0.735 |       |        |

|         |       |       |       |       |        |        |       |       |       |        |        |
|---------|-------|-------|-------|-------|--------|--------|-------|-------|-------|--------|--------|
| Fe4-SG  | 2.103 | 2.120 | 0.370 | 1.047 | 2.914  | 0.914  | 2.149 | 0.370 | 1.132 | 3.151  | 0.151  |
| Fe5-S1  | 2.570 | 2.120 | 0.370 | 0.296 |        |        | 2.149 | 0.370 | 0.321 |        |        |
| Fe5-S2B | 2.281 | 2.120 | 0.370 | 0.647 |        |        | 2.149 | 0.370 | 0.700 |        |        |
| Fe5-S4B | 2.256 | 2.120 | 0.370 | 0.692 |        |        | 2.149 | 0.370 | 0.749 |        |        |
| Fe5-SG  | 2.258 | 2.120 | 0.370 | 0.689 | 2.325  | 0.325  | 2.149 | 0.370 | 0.745 | 2.514  | -0.486 |
| Fe6-S1  | 2.930 | 2.120 | 0.370 | 0.112 |        |        | 2.149 | 0.370 | 0.121 |        |        |
| Fe6-S2B | 2.306 | 2.120 | 0.370 | 0.605 |        |        | 2.149 | 0.370 | 0.654 |        |        |
| Fe6-S3B | 2.278 | 2.120 | 0.370 | 0.652 |        |        | 2.149 | 0.370 | 0.706 |        |        |
| Fe6-SG  | 2.399 | 2.120 | 0.370 | 0.470 | 1.840  | -0.160 | 2.149 | 0.370 | 0.509 | 1.990  | -1.010 |
| Fe7-S2B | 2.296 | 2.120 | 0.370 | 0.621 |        |        | 2.149 | 0.370 | 0.672 |        |        |
| Fe7-S3B | 2.298 | 2.120 | 0.370 | 0.618 |        |        | 2.149 | 0.370 | 0.669 |        |        |
| Fe7-S4B | 2.316 | 2.120 | 0.370 | 0.589 |        |        | 2.149 | 0.370 | 0.637 |        |        |
| Fe7-SG  | 2.303 | 2.120 | 0.370 | 0.610 | 2.438  | 0.438  | 2.149 | 0.370 | 0.660 | 2.637  | -0.363 |
| Fe8-S1  | 2.498 | 2.120 | 0.370 | 0.360 |        |        | 2.149 | 0.370 | 0.389 |        |        |
| Fe8-S3B | 2.289 | 2.120 | 0.370 | 0.633 |        |        | 2.149 | 0.370 | 0.685 |        |        |
| Fe8-S4B | 2.297 | 2.120 | 0.370 | 0.620 |        |        | 2.149 | 0.370 | 0.670 |        |        |
| Fe8-SG  | 2.247 | 2.120 | 0.370 | 0.709 | 2.323  | 0.323  | 2.149 | 0.370 | 0.767 | 2.512  | -0.488 |
|         |       |       |       |       | 19.468 |        |       |       |       | 21.055 |        |

---

**Table S35** The adopted bond valence analyses for irons in P-cluster [3] from MoFe protein 1M34 which was reported as P<sup>N</sup> at 2.3 Å resolution.

| Bond                  | $r_{ij}$ (Å) | $R_0$ (Å) | B (Å) | Bval  | Sum   | Diff.                 | $R_0$ (Å) | B (Å) | Bval  | Sum   | Diff.  |
|-----------------------|--------------|-----------|-------|-------|-------|-----------------------|-----------|-------|-------|-------|--------|
| expected valence = +2 |              |           |       |       |       | expected valence = +3 |           |       |       |       |        |
| Fe1-S1                | 2.324        | 2.120     | 0.370 | 0.576 |       |                       | 2.149     | 0.370 | 0.623 |       |        |
| Fe1-S2A               | 2.296        | 2.120     | 0.370 | 0.621 |       |                       | 2.149     | 0.370 | 0.672 |       |        |
| Fe1-S3A               | 2.221        | 2.120     | 0.370 | 0.761 |       |                       | 2.149     | 0.370 | 0.823 |       |        |
| Fe1-SG                | 2.311        | 2.120     | 0.370 | 0.597 | 2.556 | 0.556                 | 2.149     | 0.370 | 0.645 | 2.764 | -0.236 |
| Fe2-S1                | 2.287        | 2.120     | 0.370 | 0.637 |       |                       | 2.149     | 0.370 | 0.689 |       |        |
| Fe2-S2A               | 2.305        | 2.120     | 0.370 | 0.607 |       |                       | 2.149     | 0.370 | 0.656 |       |        |
| Fe2-S4A               | 2.273        | 2.120     | 0.370 | 0.661 |       |                       | 2.149     | 0.370 | 0.715 |       |        |
| Fe2-SG                | 2.274        | 2.120     | 0.370 | 0.660 | 2.564 | 0.564                 | 2.149     | 0.370 | 0.713 | 2.773 | -0.227 |
| Fe3-S2A               | 2.294        | 2.120     | 0.370 | 0.625 |       |                       | 2.149     | 0.370 | 0.676 |       |        |
| Fe3-S3A               | 2.256        | 2.120     | 0.370 | 0.692 |       |                       | 2.149     | 0.370 | 0.749 |       |        |
| Fe3-S4A               | 2.317        | 2.120     | 0.370 | 0.587 |       |                       | 2.149     | 0.370 | 0.635 |       |        |
| Fe3-SG                | 2.267        | 2.120     | 0.370 | 0.672 | 2.577 | 0.577                 | 2.149     | 0.370 | 0.727 | 2.787 | -0.213 |
| Fe4-S1                | 2.347        | 2.120     | 0.370 | 0.541 |       |                       | 2.149     | 0.370 | 0.586 |       |        |
| Fe4-S3A               | 2.273        | 2.120     | 0.370 | 0.661 |       |                       | 2.149     | 0.370 | 0.715 |       |        |
| Fe4-S4A               | 2.251        | 2.120     | 0.370 | 0.702 |       |                       | 2.149     | 0.370 | 0.759 |       |        |

|         |       |       |       |       |        |       |       |       |       |        |        |
|---------|-------|-------|-------|-------|--------|-------|-------|-------|-------|--------|--------|
| Fe4-SG  | 2.226 | 2.120 | 0.370 | 0.751 | 2.656  | 0.656 | 2.149 | 0.370 | 0.812 | 2.872  | -0.128 |
| Fe6-S1  | 2.838 | 2.120 | 0.370 | 0.144 |        |       | 2.149 | 0.370 | 0.258 |        |        |
| Fe6-S2B | 2.284 | 2.120 | 0.370 | 0.642 |        |       | 2.149 | 0.370 | 0.685 |        |        |
| Fe6-S3B | 2.268 | 2.120 | 0.370 | 0.670 |        |       | 2.149 | 0.370 | 0.751 |        |        |
| Fe6-SG  | 2.266 | 2.120 | 0.370 | 0.674 | 2.130  | 0.130 | 2.149 | 0.370 | 0.635 | 2.329  | -0.671 |
| Fe6-S1  | 2.838 | 2.120 | 0.370 | 0.144 |        |       | 2.149 | 0.370 | 0.155 |        |        |
| Fe6-S2B | 2.284 | 2.120 | 0.370 | 0.642 |        |       | 2.149 | 0.370 | 0.694 |        |        |
| Fe6-S3B | 2.268 | 2.120 | 0.370 | 0.670 |        |       | 2.149 | 0.370 | 0.725 |        |        |
| Fe6-SG  | 2.266 | 2.120 | 0.370 | 0.674 | 2.130  | 0.130 | 2.149 | 0.370 | 0.729 | 2.304  | -0.696 |
| Fe7-S2B | 2.269 | 2.120 | 0.370 | 0.669 |        |       | 2.149 | 0.370 | 0.723 |        |        |
| Fe7-S3B | 2.282 | 2.120 | 0.370 | 0.645 |        |       | 2.149 | 0.370 | 0.698 |        |        |
| Fe7-S4B | 2.259 | 2.120 | 0.370 | 0.687 |        |       | 2.149 | 0.370 | 0.743 |        |        |
| Fe7-SG  | 2.295 | 2.120 | 0.370 | 0.623 | 2.624  | 0.624 | 2.149 | 0.370 | 0.674 | 2.838  | -0.162 |
| Fe8-S1  | 2.607 | 2.120 | 0.370 | 0.268 |        |       | 2.149 | 0.370 | 0.290 |        |        |
| Fe8-S3B | 2.326 | 2.120 | 0.370 | 0.573 |        |       | 2.149 | 0.370 | 0.620 |        |        |
| Fe8-S4B | 2.307 | 2.120 | 0.370 | 0.603 |        |       | 2.149 | 0.370 | 0.652 |        |        |
| Fe8-SG  | 2.241 | 2.120 | 0.370 | 0.721 | 2.166  | 0.166 | 2.149 | 0.370 | 0.780 | 2.342  | -0.658 |
|         |       |       |       |       | 19.425 |       |       |       |       | 21.008 |        |

---

**Table S36** The adopted bond valence analyses for irons in P-cluster [4] from MoFe protein 1M34 which was reported as P<sup>N</sup> at 2.3 Å resolution.

| Bond                  | $r_{ij}$ (Å) | $R_0$ (Å) | B (Å) | Bval  | Sum   | Diff.                 | $R_0$ (Å) | B (Å) | Bval  | Sum   | Diff.  |
|-----------------------|--------------|-----------|-------|-------|-------|-----------------------|-----------|-------|-------|-------|--------|
| expected valence = +2 |              |           |       |       |       | expected valence = +3 |           |       |       |       |        |
| Fe1-S1                | 2.265        | 2.120     | 0.370 | 0.676 |       |                       | 2.149     | 0.370 | 0.731 |       |        |
| Fe1-S2A               | 2.273        | 2.120     | 0.370 | 0.661 |       |                       | 2.149     | 0.370 | 0.715 |       |        |
| Fe1-S3A               | 2.280        | 2.120     | 0.370 | 0.649 |       |                       | 2.149     | 0.370 | 0.702 |       |        |
| Fe1-SG                | 2.307        | 2.120     | 0.370 | 0.603 | 2.589 | 0.589                 | 2.149     | 0.370 | 0.652 | 2.800 | -0.200 |
| Fe2-S1                | 2.272        | 2.120     | 0.370 | 0.663 |       |                       | 2.149     | 0.370 | 0.717 |       |        |
| Fe2-S2A               | 2.267        | 2.120     | 0.370 | 0.672 |       |                       | 2.149     | 0.370 | 0.727 |       |        |
| Fe2-S4A               | 2.276        | 2.120     | 0.370 | 0.656 |       |                       | 2.149     | 0.370 | 0.709 |       |        |
| Fe2-SG                | 2.277        | 2.120     | 0.370 | 0.654 | 2.645 | 0.645                 | 2.149     | 0.370 | 0.708 | 2.861 | -0.139 |
| Fe3-S2A               | 2.292        | 2.120     | 0.370 | 0.628 |       |                       | 2.149     | 0.370 | 0.679 |       |        |
| Fe3-S3A               | 2.250        | 2.120     | 0.370 | 0.704 |       |                       | 2.149     | 0.370 | 0.761 |       |        |
| Fe3-S4A               | 2.291        | 2.120     | 0.370 | 0.630 |       |                       | 2.149     | 0.370 | 0.681 |       |        |
| Fe3-SG                | 2.288        | 2.120     | 0.370 | 0.635 | 2.597 | 0.597                 | 2.149     | 0.370 | 0.687 | 2.809 | -0.191 |
| Fe4-S1                | 2.324        | 2.120     | 0.370 | 0.576 |       |                       | 2.149     | 0.370 | 0.623 |       |        |
| Fe4-S3A               | 2.285        | 2.120     | 0.370 | 0.640 |       |                       | 2.149     | 0.370 | 0.692 |       |        |
| Fe4-S4A               | 2.265        | 2.120     | 0.370 | 0.676 |       |                       | 2.149     | 0.370 | 0.731 |       |        |



|         |       |       |       |       |        |        |       |       |       |        |        |
|---------|-------|-------|-------|-------|--------|--------|-------|-------|-------|--------|--------|
| Fe4-SG  | 2.253 | 2.120 | 0.370 | 0.698 | 2.590  | 0.590  | 2.149 | 0.370 | 0.755 | 2.801  | -0.199 |
| Fe5-S1  | 2.680 | 2.120 | 0.370 | 0.220 |        |        | 2.149 | 0.370 | 0.238 |        |        |
| Fe5-S2B | 2.282 | 2.120 | 0.370 | 0.645 |        |        | 2.149 | 0.370 | 0.698 |        |        |
| Fe5-S4B | 2.258 | 2.120 | 0.370 | 0.689 |        |        | 2.149 | 0.370 | 0.745 |        |        |
| Fe5-SG  | 2.305 | 2.120 | 0.370 | 0.607 | 2.161  | 0.161  | 2.149 | 0.370 | 0.656 | 2.337  | -0.663 |
| Fe6-S1  | 2.947 | 2.120 | 0.370 | 0.107 |        |        | 2.149 | 0.370 | 0.116 |        |        |
| Fe6-S2B | 2.290 | 2.120 | 0.370 | 0.632 |        |        | 2.149 | 0.370 | 0.683 |        |        |
| Fe6-S3B | 2.312 | 2.120 | 0.370 | 0.595 |        |        | 2.149 | 0.370 | 0.644 |        |        |
| Fe6-SG  | 2.273 | 2.120 | 0.370 | 0.661 | 1.995  | -0.005 | 2.149 | 0.370 | 0.715 | 2.158  | -0.842 |
| Fe7-S2B | 2.302 | 2.120 | 0.370 | 0.611 |        |        | 2.149 | 0.370 | 0.661 |        |        |
| Fe7-S3B | 2.309 | 2.120 | 0.370 | 0.600 |        |        | 2.149 | 0.370 | 0.649 |        |        |
| Fe7-S4B | 2.299 | 2.120 | 0.370 | 0.616 |        |        | 2.149 | 0.370 | 0.667 |        |        |
| Fe7-SG  | 2.309 | 2.120 | 0.370 | 0.600 | 2.428  | 0.428  | 2.149 | 0.370 | 0.649 | 2.626  | -0.374 |
| Fe8-S1  | 2.521 | 2.120 | 0.370 | 0.338 |        |        | 2.149 | 0.370 | 0.366 |        |        |
| Fe8-S3B | 2.290 | 2.120 | 0.370 | 0.632 |        |        | 2.149 | 0.370 | 0.683 |        |        |
| Fe8-S4B | 2.281 | 2.120 | 0.370 | 0.647 |        |        | 2.149 | 0.370 | 0.700 |        |        |
| Fe8-SG  | 2.252 | 2.120 | 0.370 | 0.700 | 2.317  | 0.317  | 2.149 | 0.370 | 0.757 | 2.506  | -0.494 |
|         |       |       |       |       | 19.323 |        |       |       |       | 20.898 |        |

---

**Table S37** The adopted bond valence analyses for irons in P-cluster [1] from MoFe protein 1QGU which was reported as P<sup>N</sup> at 1.6 Å resolution.

| Bond                  | $r_{ij}$ (Å) | $R_0$ (Å) | B (Å) | Bval  | Sum   | Diff.                 | $R_0$ (Å) | B (Å) | Bval  | Sum   | Diff.  |
|-----------------------|--------------|-----------|-------|-------|-------|-----------------------|-----------|-------|-------|-------|--------|
| expected valence = +2 |              |           |       |       |       | expected valence = +3 |           |       |       |       |        |
| Fe1-S1                | 2.403        | 2.120     | 0.370 | 0.465 |       |                       | 2.149     | 0.370 | 0.503 |       |        |
| Fe1-S2A               | 2.315        | 2.120     | 0.370 | 0.590 |       |                       | 2.149     | 0.370 | 0.638 |       |        |
| Fe1-S3A               | 2.270        | 2.120     | 0.370 | 0.667 |       |                       | 2.149     | 0.370 | 0.721 |       |        |
| Fe1-SG                | 2.399        | 2.120     | 0.370 | 0.470 | 2.193 | 0.193                 | 2.149     | 0.370 | 0.509 | 2.372 | -0.628 |
| Fe2-S1                | 2.490        | 2.120     | 0.370 | 0.368 |       |                       | 2.149     | 0.370 | 0.398 |       |        |
| Fe2-S2A               | 2.301        | 2.120     | 0.370 | 0.613 |       |                       | 2.149     | 0.370 | 0.663 |       |        |
| Fe2-S4A               | 2.274        | 2.120     | 0.370 | 0.660 |       |                       | 2.149     | 0.370 | 0.713 |       |        |
| Fe2-SG                | 2.374        | 2.120     | 0.370 | 0.503 | 2.144 | 0.144                 | 2.149     | 0.370 | 0.544 | 2.319 | -0.681 |
| Fe3-S2A               | 2.323        | 2.120     | 0.370 | 0.578 |       |                       | 2.149     | 0.370 | 0.625 |       |        |
| Fe3-S3A               | 2.380        | 2.120     | 0.370 | 0.495 |       |                       | 2.149     | 0.370 | 0.536 |       |        |
| Fe3-S4A               | 2.288        | 2.120     | 0.370 | 0.635 |       |                       | 2.149     | 0.370 | 0.687 |       |        |
| Fe3-SG                | 2.378        | 2.120     | 0.370 | 0.498 | 2.206 | 0.206                 | 2.149     | 0.370 | 0.539 | 2.386 | -0.614 |
| Fe4-S1                | 2.391        | 2.120     | 0.370 | 0.481 |       |                       | 2.149     | 0.370 | 0.520 |       |        |
| Fe4-S3A               | 2.237        | 2.120     | 0.370 | 0.729 |       |                       | 2.149     | 0.370 | 0.788 |       |        |
| Fe4-S4A               | 2.273        | 2.120     | 0.370 | 0.661 |       |                       | 2.149     | 0.370 | 0.715 |       |        |

|         |       |       |       |       |        |       |       |       |       |        |        |
|---------|-------|-------|-------|-------|--------|-------|-------|-------|-------|--------|--------|
| Fe4-SG  | 2.426 | 2.120 | 0.370 | 0.437 | 2.308  | 0.308 | 2.149 | 0.370 | 0.473 | 2.497  | -0.503 |
| Fe5-S1  | 2.426 | 2.120 | 0.370 | 0.437 |        |       | 2.149 | 0.370 | 0.473 |        |        |
| Fe5-S2B | 2.318 | 2.120 | 0.370 | 0.586 |        |       | 2.149 | 0.370 | 0.633 |        |        |
| Fe5-S4B | 2.253 | 2.120 | 0.370 | 0.698 |        |       | 2.149 | 0.370 | 0.755 |        |        |
| Fe5-SG  | 2.457 | 2.120 | 0.370 | 0.402 | 2.123  | 0.123 | 2.149 | 0.370 | 0.435 | 2.296  | -0.704 |
| Fe6-S1  | 2.504 | 2.120 | 0.370 | 0.354 |        |       | 2.149 | 0.370 | 0.383 |        |        |
| Fe6-S2B | 2.316 | 2.120 | 0.370 | 0.589 |        |       | 2.149 | 0.370 | 0.637 |        |        |
| Fe6-S3B | 2.357 | 2.120 | 0.370 | 0.527 |        |       | 2.149 | 0.370 | 0.570 |        |        |
| Fe6-SG  | 2.316 | 2.120 | 0.370 | 0.589 | 2.059  | 0.059 | 2.149 | 0.370 | 0.637 | 2.227  | -0.773 |
| Fe7-S2B | 2.361 | 2.120 | 0.370 | 0.521 |        |       | 2.149 | 0.370 | 0.564 |        |        |
| Fe7-S3B | 2.335 | 2.120 | 0.370 | 0.559 |        |       | 2.149 | 0.370 | 0.605 |        |        |
| Fe7-S4B | 2.375 | 2.120 | 0.370 | 0.502 |        |       | 2.149 | 0.370 | 0.543 |        |        |
| Fe7-SG  | 2.357 | 2.120 | 0.370 | 0.527 | 2.110  | 0.110 | 2.149 | 0.370 | 0.570 | 2.282  | -0.718 |
| Fe8-S1  | 2.485 | 2.120 | 0.370 | 0.373 |        |       | 2.149 | 0.370 | 0.403 |        |        |
| Fe8-S3B | 2.386 | 2.120 | 0.370 | 0.487 |        |       | 2.149 | 0.370 | 0.527 |        |        |
| Fe8-S4B | 2.229 | 2.120 | 0.370 | 0.745 |        |       | 2.149 | 0.370 | 0.806 |        |        |
| Fe8-SG  | 2.311 | 2.120 | 0.370 | 0.597 | 2.202  | 0.202 | 2.149 | 0.370 | 0.645 | 2.381  | -0.619 |
|         |       |       |       |       | 17.344 |       |       |       |       | 18.759 |        |

---

**Table S38** The adopted bond valence analyses for irons in P-cluster [2] from MoFe protein 1QGU which was reported as P<sup>N</sup> at 1.6 Å resolution.

| Bond                  | $r_{ij}$ (Å) | $R_0$ (Å) | B (Å) | Bval  | Sum   | Diff.                 | $R_0$ (Å) | B (Å) | Bval  | Sum   | Diff.  |
|-----------------------|--------------|-----------|-------|-------|-------|-----------------------|-----------|-------|-------|-------|--------|
| expected valence = +2 |              |           |       |       |       | expected valence = +3 |           |       |       |       |        |
| Fe1-S1                | 2.432        | 2.120     | 0.370 | 0.430 |       |                       | 2.149     | 0.370 | 0.465 |       |        |
| Fe1-S2A               | 2.373        | 2.120     | 0.370 | 0.505 |       |                       | 2.149     | 0.370 | 0.546 |       |        |
| Fe1-S3A               | 2.285        | 2.120     | 0.370 | 0.640 |       |                       | 2.149     | 0.370 | 0.692 |       |        |
| Fe1-SG                | 2.387        | 2.120     | 0.370 | 0.486 | 2.061 | 0.061                 | 2.149     | 0.370 | 0.526 | 2.229 | -0.771 |
| Fe2-S1                | 2.534        | 2.120     | 0.370 | 0.327 |       |                       | 2.149     | 0.370 | 0.353 |       |        |
| Fe2-S2A               | 2.319        | 2.120     | 0.370 | 0.584 |       |                       | 2.149     | 0.370 | 0.632 |       |        |
| Fe2-S4A               | 2.288        | 2.120     | 0.370 | 0.635 |       |                       | 2.149     | 0.370 | 0.687 |       |        |
| Fe2-SG                | 2.342        | 2.120     | 0.370 | 0.549 | 2.095 | 0.095                 | 2.149     | 0.370 | 0.594 | 2.265 | -0.735 |
| Fe3-S2A               | 2.309        | 2.120     | 0.370 | 0.600 |       |                       | 2.149     | 0.370 | 0.649 |       |        |
| Fe3-S3A               | 2.366        | 2.120     | 0.370 | 0.514 |       |                       | 2.149     | 0.370 | 0.556 |       |        |
| Fe3-S4A               | 2.279        | 2.120     | 0.370 | 0.651 |       |                       | 2.149     | 0.370 | 0.704 |       |        |
| Fe3-SG                | 2.406        | 2.120     | 0.370 | 0.462 | 2.227 | 0.227                 | 2.149     | 0.370 | 0.499 | 2.408 | -0.592 |
| Fe4-S1                | 2.392        | 2.120     | 0.370 | 0.479 |       |                       | 2.149     | 0.370 | 0.519 |       |        |
| Fe4-S3A               | 2.269        | 2.120     | 0.370 | 0.669 |       |                       | 2.149     | 0.370 | 0.723 |       |        |
| Fe4-S4A               | 2.290        | 2.120     | 0.370 | 0.632 |       |                       | 2.149     | 0.370 | 0.683 |       |        |

|         |       |       |       |       |        |       |       |       |       |        |        |
|---------|-------|-------|-------|-------|--------|-------|-------|-------|-------|--------|--------|
| Fe4-SG  | 2.447 | 2.120 | 0.370 | 0.413 | 2.193  | 0.193 | 2.149 | 0.370 | 0.447 | 2.372  | -0.628 |
| Fe5-S1  | 2.401 | 2.120 | 0.370 | 0.468 |        |       | 2.149 | 0.370 | 0.506 |        |        |
| Fe5-S2B | 2.271 | 2.120 | 0.370 | 0.665 |        |       | 2.149 | 0.370 | 0.719 |        |        |
| Fe5-S4B | 2.302 | 2.120 | 0.370 | 0.611 |        |       | 2.149 | 0.370 | 0.661 |        |        |
| Fe5-SG  | 2.490 | 2.120 | 0.370 | 0.368 | 2.112  | 0.112 | 2.149 | 0.370 | 0.398 | 2.284  | -0.716 |
| Fe6-S1  | 2.443 | 2.120 | 0.370 | 0.418 |        |       | 2.149 | 0.370 | 0.452 |        |        |
| Fe6-S2B | 2.308 | 2.120 | 0.370 | 0.602 |        |       | 2.149 | 0.370 | 0.651 |        |        |
| Fe6-S3B | 2.362 | 2.120 | 0.370 | 0.520 |        |       | 2.149 | 0.370 | 0.562 |        |        |
| Fe6-SG  | 2.344 | 2.120 | 0.370 | 0.546 | 2.085  | 0.085 | 2.149 | 0.370 | 0.590 | 2.255  | -0.745 |
| Fe7-S2B | 2.379 | 2.120 | 0.370 | 0.497 |        |       | 2.149 | 0.370 | 0.537 |        |        |
| Fe7-S3B | 2.290 | 2.120 | 0.370 | 0.632 |        |       | 2.149 | 0.370 | 0.683 |        |        |
| Fe7-S4B | 2.350 | 2.120 | 0.370 | 0.537 |        |       | 2.149 | 0.370 | 0.581 |        |        |
| Fe7-SG  | 2.361 | 2.120 | 0.370 | 0.521 | 2.187  | 0.187 | 2.149 | 0.370 | 0.564 | 2.365  | -0.635 |
| Fe8-S1  | 2.501 | 2.120 | 0.370 | 0.357 |        |       | 2.149 | 0.370 | 0.386 |        |        |
| Fe8-S3B | 2.293 | 2.120 | 0.370 | 0.627 |        |       | 2.149 | 0.370 | 0.678 |        |        |
| Fe8-S4B | 2.235 | 2.120 | 0.370 | 0.733 |        |       | 2.149 | 0.370 | 0.793 |        |        |
| Fe8-SG  | 2.327 | 2.120 | 0.370 | 0.572 | 2.288  | 0.288 | 2.149 | 0.370 | 0.618 | 2.475  | -0.525 |
|         |       |       |       |       | 17.247 |       |       |       |       | 18.653 |        |

---

**Table S39** The adopted bond valence analyses for irons in P-cluster [1] from MoFe protein 2AFH which was reported as P<sup>N</sup> at 2.1 Å resolution.

| Bond                  | $r_{ij}$ (Å) | $R_0$ (Å) | B (Å) | Bval  | Sum   | Diff.                 | $R_0$ (Å) | B (Å) | Bval  | Sum   | Diff.  |
|-----------------------|--------------|-----------|-------|-------|-------|-----------------------|-----------|-------|-------|-------|--------|
| expected valence = +2 |              |           |       |       |       | expected valence = +3 |           |       |       |       |        |
| Fe1-S1                | 2.285        | 2.120     | 0.370 | 0.640 |       |                       | 2.149     | 0.370 | 0.692 |       |        |
| Fe1-S2A               | 2.253        | 2.120     | 0.370 | 0.698 |       |                       | 2.149     | 0.370 | 0.755 |       |        |
| Fe1-S3A               | 2.285        | 2.120     | 0.370 | 0.640 |       |                       | 2.149     | 0.370 | 0.692 |       |        |
| Fe1-SG                | 2.299        | 2.120     | 0.370 | 0.616 | 2.595 | 0.595                 | 2.149     | 0.370 | 0.667 | 2.807 | -0.193 |
| Fe2-S1                | 2.667        | 2.120     | 0.370 | 0.228 |       |                       | 2.149     | 0.370 | 0.247 |       |        |
| Fe2-S2A               | 2.304        | 2.120     | 0.370 | 0.608 |       |                       | 2.149     | 0.370 | 0.658 |       |        |
| Fe2-S4A               | 2.286        | 2.120     | 0.370 | 0.638 |       |                       | 2.149     | 0.370 | 0.691 |       |        |
| Fe2-SG                | 2.328        | 2.120     | 0.370 | 0.570 | 2.045 | 0.045                 | 2.149     | 0.370 | 0.616 | 2.211 | -0.789 |
| Fe3-S2A               | 2.288        | 2.120     | 0.370 | 0.635 |       |                       | 2.149     | 0.370 | 0.687 |       |        |
| Fe3-S3A               | 2.267        | 2.120     | 0.370 | 0.672 |       |                       | 2.149     | 0.370 | 0.727 |       |        |
| Fe3-S4A               | 2.277        | 2.120     | 0.370 | 0.654 |       |                       | 2.149     | 0.370 | 0.708 |       |        |
| Fe3-SG                | 2.264        | 2.120     | 0.370 | 0.678 | 2.639 | 0.639                 | 2.149     | 0.370 | 0.733 | 2.854 | -0.146 |
| Fe4-S1                | 2.142        | 2.120     | 0.370 | 0.942 |       |                       | 2.149     | 0.370 | 1.019 |       |        |
| Fe4-S3A               | 2.240        | 2.120     | 0.370 | 0.723 |       |                       | 2.149     | 0.370 | 0.782 |       |        |
| Fe4-S4A               | 2.258        | 2.120     | 0.370 | 0.689 |       |                       | 2.149     | 0.370 | 0.745 |       |        |

|         |       |       |       |       |        |       |       |       |       |        |        |
|---------|-------|-------|-------|-------|--------|-------|-------|-------|-------|--------|--------|
| Fe4-SG  | 2.275 | 2.120 | 0.370 | 0.658 | 3.012  | 1.012 | 2.149 | 0.370 | 0.711 | 3.257  | 0.257  |
| Fe5-S1  | 2.107 | 2.120 | 0.370 | 1.036 |        |       | 2.149 | 0.370 | 1.120 |        |        |
| Fe5-S2B | 2.244 | 2.120 | 0.370 | 0.715 |        |       | 2.149 | 0.370 | 0.774 |        |        |
| Fe5-S4B | 2.264 | 2.120 | 0.370 | 0.678 |        |       | 2.149 | 0.370 | 0.733 |        |        |
| Fe5-SG  | 2.300 | 2.120 | 0.370 | 0.615 | 3.043  | 1.043 | 2.149 | 0.370 | 0.665 | 3.292  | 0.292  |
| Fe6-S1  | 2.600 | 2.120 | 0.370 | 0.273 |        |       | 2.149 | 0.370 | 0.296 |        |        |
| Fe6-S2B | 2.291 | 2.120 | 0.370 | 0.630 |        |       | 2.149 | 0.370 | 0.681 |        |        |
| Fe6-S3B | 2.269 | 2.120 | 0.370 | 0.669 |        |       | 2.149 | 0.370 | 0.723 |        |        |
| Fe6-SG  | 2.311 | 2.120 | 0.370 | 0.597 | 2.168  | 0.168 | 2.149 | 0.370 | 0.645 | 2.345  | -0.655 |
| Fe7-S2B | 2.300 | 2.120 | 0.370 | 0.615 |        |       | 2.149 | 0.370 | 0.665 |        |        |
| Fe7-S3B | 2.303 | 2.120 | 0.370 | 0.610 |        |       | 2.149 | 0.370 | 0.660 |        |        |
| Fe7-S4B | 2.271 | 2.120 | 0.370 | 0.665 |        |       | 2.149 | 0.370 | 0.719 |        |        |
| Fe7-SG  | 2.350 | 2.120 | 0.370 | 0.537 | 2.427  | 0.427 | 2.149 | 0.370 | 0.581 | 2.624  | -0.376 |
| Fe8-S1  | 2.228 | 2.120 | 0.370 | 0.747 |        |       | 2.149 | 0.370 | 0.808 |        |        |
| Fe8-S3B | 2.225 | 2.120 | 0.370 | 0.753 |        |       | 2.149 | 0.370 | 0.814 |        |        |
| Fe8-S4B | 2.273 | 2.120 | 0.370 | 0.661 |        |       | 2.149 | 0.370 | 0.715 |        |        |
| Fe8-SG  | 2.235 | 2.120 | 0.370 | 0.733 | 2.894  | 0.894 | 2.149 | 0.370 | 0.793 | 3.130  | 0.130  |
|         |       |       |       |       | 20.823 |       |       |       |       | 22.520 |        |

---

**Table S40** The adopted bond valence analyses for irons in P-cluster [2] from MoFe protein 2AFH which was reported as P<sup>N</sup> at 2.1 Å resolution.

| Bond                  | $r_{ij}$ (Å) | $R_0$ (Å) | B (Å) | Bval  | Sum   | Diff.                 | $R_0$ (Å) | B (Å) | Bval  | Sum   | Diff.  |
|-----------------------|--------------|-----------|-------|-------|-------|-----------------------|-----------|-------|-------|-------|--------|
| expected valence = +2 |              |           |       |       |       | expected valence = +3 |           |       |       |       |        |
| Fe1-S1                | 2.124        | 2.120     | 0.370 | 0.989 |       |                       | 2.149     | 0.370 | 1.070 |       |        |
| Fe1-S2A               | 2.265        | 2.120     | 0.370 | 0.676 |       |                       | 2.149     | 0.370 | 0.731 |       |        |
| Fe1-S3A               | 2.250        | 2.120     | 0.370 | 0.704 |       |                       | 2.149     | 0.370 | 0.761 |       |        |
| Fe1-SG                | 2.268        | 2.120     | 0.370 | 0.670 | 3.039 | 1.039                 | 2.149     | 0.370 | 0.725 | 3.287 | 0.287  |
| Fe2-S1                | 2.686        | 2.120     | 0.370 | 0.217 |       |                       | 2.149     | 0.370 | 0.234 |       |        |
| Fe2-S2A               | 2.278        | 2.120     | 0.370 | 0.652 |       |                       | 2.149     | 0.370 | 0.706 |       |        |
| Fe2-S4A               | 2.287        | 2.120     | 0.370 | 0.637 |       |                       | 2.149     | 0.370 | 0.689 |       |        |
| Fe2-SG                | 2.338        | 2.120     | 0.370 | 0.555 | 2.061 | 0.061                 | 2.149     | 0.370 | 0.600 | 2.229 | -0.771 |
| Fe3-S2A               | 2.266        | 2.120     | 0.370 | 0.674 |       |                       | 2.149     | 0.370 | 0.729 |       |        |
| Fe3-S3A               | 2.260        | 2.120     | 0.370 | 0.685 |       |                       | 2.149     | 0.370 | 0.741 |       |        |
| Fe3-S4A               | 2.284        | 2.120     | 0.370 | 0.642 |       |                       | 2.149     | 0.370 | 0.694 |       |        |
| Fe3-SG                | 2.242        | 2.120     | 0.370 | 0.719 | 2.720 | 0.720                 | 2.149     | 0.370 | 0.778 | 2.942 | -0.058 |
| Fe4-S1                | 2.127        | 2.120     | 0.370 | 0.981 |       |                       | 2.149     | 0.370 | 1.061 |       |        |
| Fe4-S3A               | 2.258        | 2.120     | 0.370 | 0.689 |       |                       | 2.149     | 0.370 | 0.745 |       |        |
| Fe4-S4A               | 2.243        | 2.120     | 0.370 | 0.717 |       |                       | 2.149     | 0.370 | 0.776 |       |        |



|         |       |       |       |       |        |       |       |       |       |        |        |
|---------|-------|-------|-------|-------|--------|-------|-------|-------|-------|--------|--------|
| Fe4-SG  | 2.263 | 2.120 | 0.370 | 0.679 | 3.067  | 1.067 | 2.149 | 0.370 | 0.735 | 3.317  | 0.317  |
| Fe5-S1  | 2.155 | 2.120 | 0.370 | 0.910 |        |       | 2.149 | 0.370 | 0.984 |        |        |
| Fe5-S2B | 2.237 | 2.120 | 0.370 | 0.729 |        |       | 2.149 | 0.370 | 0.788 |        |        |
| Fe5-S4B | 2.281 | 2.120 | 0.370 | 0.647 |        |       | 2.149 | 0.370 | 0.700 |        |        |
| Fe5-SG  | 2.278 | 2.120 | 0.370 | 0.652 | 2.938  | 0.938 | 2.149 | 0.370 | 0.706 | 3.178  | 0.178  |
| Fe6-S1  | 2.634 | 2.120 | 0.370 | 0.249 |        |       | 2.149 | 0.370 | 0.270 |        |        |
| Fe6-S2B | 2.296 | 2.120 | 0.370 | 0.621 |        |       | 2.149 | 0.370 | 0.672 |        |        |
| Fe6-S3B | 2.295 | 2.120 | 0.370 | 0.623 |        |       | 2.149 | 0.370 | 0.674 |        |        |
| Fe6-SG  | 2.328 | 2.120 | 0.370 | 0.570 | 2.064  | 0.064 | 2.149 | 0.370 | 0.616 | 2.232  | -0.768 |
| Fe7-S2B | 2.309 | 2.120 | 0.370 | 0.600 |        |       | 2.149 | 0.370 | 0.649 |        |        |
| Fe7-S3B | 2.319 | 2.120 | 0.370 | 0.584 |        |       | 2.149 | 0.370 | 0.632 |        |        |
| Fe7-S4B | 2.263 | 2.120 | 0.370 | 0.679 |        |       | 2.149 | 0.370 | 0.735 |        |        |
| Fe7-SG  | 2.326 | 2.120 | 0.370 | 0.573 | 2.437  | 0.437 | 2.149 | 0.370 | 0.620 | 2.635  | -0.365 |
| Fe8-S1  | 2.169 | 2.120 | 0.370 | 0.876 |        |       | 2.149 | 0.370 | 0.947 |        |        |
| Fe8-S3B | 2.244 | 2.120 | 0.370 | 0.715 |        |       | 2.149 | 0.370 | 0.774 |        |        |
| Fe8-S4B | 2.264 | 2.120 | 0.370 | 0.678 |        |       | 2.149 | 0.370 | 0.733 |        |        |
| Fe8-SG  | 2.205 | 2.120 | 0.370 | 0.795 | 3.064  | 1.064 | 2.149 | 0.370 | 0.860 | 3.313  | 0.313  |
|         |       |       |       |       | 21.388 |       |       |       |       | 23.132 |        |

---

**Table S41** The adopted bond valence analyses for irons in P-cluster [1] from MoFe protein 3MIN which was reported as P<sup>N</sup> at 2.03 Å resolution.

| Bond                  | $r_{ij}$ (Å) | $R_0$ (Å) | B (Å) | Bval  | Sum   | Diff.                 | $R_0$ (Å) | B (Å) | Bval  | Sum   | Diff.  |
|-----------------------|--------------|-----------|-------|-------|-------|-----------------------|-----------|-------|-------|-------|--------|
| expected valence = +2 |              |           |       |       |       | expected valence = +3 |           |       |       |       |        |
| Fe1-S1                | 2.259        | 2.120     | 0.370 | 0.687 |       |                       | 2.149     | 0.370 | 0.743 |       |        |
| Fe1-S2A               | 2.154        | 2.120     | 0.370 | 0.912 |       |                       | 2.149     | 0.370 | 0.987 |       |        |
| Fe1-S3A               | 2.302        | 2.120     | 0.370 | 0.611 |       |                       | 2.149     | 0.370 | 0.661 |       |        |
| Fe1-SG                | 2.193        | 2.120     | 0.370 | 0.821 | 3.031 | 1.031                 | 2.149     | 0.370 | 0.888 | 3.279 | 0.279  |
| Fe2-S1                | 2.343        | 2.120     | 0.370 | 0.547 |       |                       | 2.149     | 0.370 | 0.592 |       |        |
| Fe2-S2A               | 2.226        | 2.120     | 0.370 | 0.751 |       |                       | 2.149     | 0.370 | 0.812 |       |        |
| Fe2-S4A               | 2.195        | 2.120     | 0.370 | 0.817 |       |                       | 2.149     | 0.370 | 0.883 |       |        |
| Fe2-SG                | 2.440        | 2.120     | 0.370 | 0.421 | 2.536 | 0.536                 | 2.149     | 0.370 | 0.455 | 2.743 | -0.257 |
| Fe3-S2A               | 2.233        | 2.120     | 0.370 | 0.737 |       |                       | 2.149     | 0.370 | 0.797 |       |        |
| Fe3-S3A               | 2.298        | 2.120     | 0.370 | 0.618 |       |                       | 2.149     | 0.370 | 0.669 |       |        |
| Fe3-S4A               | 2.264        | 2.120     | 0.370 | 0.678 |       |                       | 2.149     | 0.370 | 0.733 |       |        |
| Fe3-SG                | 2.204        | 2.120     | 0.370 | 0.797 | 2.829 | 0.829                 | 2.149     | 0.370 | 0.862 | 3.060 | 0.060  |
| Fe4-S1                | 2.225        | 2.120     | 0.370 | 0.753 |       |                       | 2.149     | 0.370 | 0.814 |       |        |
| Fe4-S3A               | 2.211        | 2.120     | 0.370 | 0.782 |       |                       | 2.149     | 0.370 | 0.846 |       |        |
| Fe4-S4A               | 2.157        | 2.120     | 0.370 | 0.905 |       |                       | 2.149     | 0.370 | 0.979 |       |        |

|         |       |       |       |       |        |       |       |       |       |        |        |
|---------|-------|-------|-------|-------|--------|-------|-------|-------|-------|--------|--------|
| Fe4-SG  | 2.209 | 2.120 | 0.370 | 0.786 | 3.226  | 1.226 | 2.149 | 0.370 | 0.850 | 3.489  | 0.489  |
| Fe5-S1  | 2.427 | 2.120 | 0.370 | 0.436 |        |       | 2.149 | 0.370 | 0.472 |        |        |
| Fe5-S2B | 2.202 | 2.120 | 0.370 | 0.801 |        |       | 2.149 | 0.370 | 0.867 |        |        |
| Fe5-S4B | 2.135 | 2.120 | 0.370 | 0.960 |        |       | 2.149 | 0.370 | 1.039 |        |        |
| Fe5-SG  | 2.331 | 2.120 | 0.370 | 0.565 | 2.763  | 0.763 | 2.149 | 0.370 | 0.611 | 2.988  | -0.012 |
| Fe6-S1  | 2.916 | 2.120 | 0.370 | 0.116 |        |       | 2.149 | 0.370 | 0.126 |        |        |
| Fe6-S2B | 2.263 | 2.120 | 0.370 | 0.679 |        |       | 2.149 | 0.370 | 0.735 |        |        |
| Fe6-S3B | 2.206 | 2.120 | 0.370 | 0.793 |        |       | 2.149 | 0.370 | 0.857 |        |        |
| Fe6-SG  | 2.288 | 2.120 | 0.370 | 0.635 | 2.223  | 0.223 | 2.149 | 0.370 | 0.687 | 2.405  | -0.595 |
| Fe7-S2B | 2.156 | 2.120 | 0.370 | 0.907 |        |       | 2.149 | 0.370 | 0.981 |        |        |
| Fe7-S3B | 2.269 | 2.120 | 0.370 | 0.669 |        |       | 2.149 | 0.370 | 0.723 |        |        |
| Fe7-S4B | 2.385 | 2.120 | 0.370 | 0.489 |        |       | 2.149 | 0.370 | 0.528 |        |        |
| Fe7-SG  | 2.358 | 2.120 | 0.370 | 0.526 | 2.590  | 0.590 | 2.149 | 0.370 | 0.568 | 2.801  | -0.199 |
| Fe8-S1  | 2.445 | 2.120 | 0.370 | 0.415 |        |       | 2.149 | 0.370 | 0.449 |        |        |
| Fe8-S3B | 2.278 | 2.120 | 0.370 | 0.652 |        |       | 2.149 | 0.370 | 0.706 |        |        |
| Fe8-S4B | 2.289 | 2.120 | 0.370 | 0.633 |        |       | 2.149 | 0.370 | 0.685 |        |        |
| Fe8-SG  | 2.306 | 2.120 | 0.370 | 0.605 | 2.306  | 0.306 | 2.149 | 0.370 | 0.654 | 2.494  | -0.506 |
|         |       |       |       |       | 21.505 |       |       |       |       | 23.259 |        |

---

**Table S42** The adopted bond valence analyses for irons in P-cluster [2] from MoFe protein 3MIN which was reported as P<sup>N</sup> at 2.03 Å resolution.

| Bond                  | $r_{ij}$ (Å) | $R_0$ (Å) | B (Å) | Bval  | Sum   | Diff.                 | $R_0$ (Å) | B (Å) | Bval  | Sum   | Diff.  |
|-----------------------|--------------|-----------|-------|-------|-------|-----------------------|-----------|-------|-------|-------|--------|
| expected valence = +2 |              |           |       |       |       | expected valence = +3 |           |       |       |       |        |
| Fe1-S1                | 2.380        | 2.120     | 0.370 | 0.495 |       |                       | 2.149     | 0.370 | 0.536 |       |        |
| Fe1-S2A               | 2.207        | 2.120     | 0.370 | 0.790 |       |                       | 2.149     | 0.370 | 0.855 |       |        |
| Fe1-S3A               | 2.197        | 2.120     | 0.370 | 0.812 |       |                       | 2.149     | 0.370 | 0.878 |       |        |
| Fe1-SG                | 2.326        | 2.120     | 0.370 | 0.573 | 2.671 | 0.671                 | 2.149     | 0.370 | 0.620 | 2.889 | -0.111 |
| Fe2-S1                | 2.500        | 2.120     | 0.370 | 0.358 |       |                       | 2.149     | 0.370 | 0.387 |       |        |
| Fe2-S2A               | 2.210        | 2.120     | 0.370 | 0.784 |       |                       | 2.149     | 0.370 | 0.848 |       |        |
| Fe2-S4A               | 2.314        | 2.120     | 0.370 | 0.592 |       |                       | 2.149     | 0.370 | 0.640 |       |        |
| Fe2-SG                | 2.315        | 2.120     | 0.370 | 0.590 | 2.324 | 0.324                 | 2.149     | 0.370 | 0.638 | 2.514 | -0.486 |
| Fe3-S2A               | 2.212        | 2.120     | 0.370 | 0.780 |       |                       | 2.149     | 0.370 | 0.843 |       |        |
| Fe3-S3A               | 2.215        | 2.120     | 0.370 | 0.774 |       |                       | 2.149     | 0.370 | 0.837 |       |        |
| Fe3-S4A               | 2.398        | 2.120     | 0.370 | 0.472 |       |                       | 2.149     | 0.370 | 0.510 |       |        |
| Fe3-SG                | 2.213        | 2.120     | 0.370 | 0.778 | 2.803 | 0.803                 | 2.149     | 0.370 | 0.841 | 3.031 | 0.031  |
| Fe4-S1                | 2.417        | 2.120     | 0.370 | 0.448 |       |                       | 2.149     | 0.370 | 0.485 |       |        |
| Fe4-S3A               | 2.246        | 2.120     | 0.370 | 0.711 |       |                       | 2.149     | 0.370 | 0.769 |       |        |
| Fe4-S4A               | 2.221        | 2.120     | 0.370 | 0.761 |       |                       | 2.149     | 0.370 | 0.823 |       |        |

|         |       |       |       |       |        |       |       |       |       |        |        |
|---------|-------|-------|-------|-------|--------|-------|-------|-------|-------|--------|--------|
| Fe4-SG  | 2.267 | 2.120 | 0.370 | 0.672 | 2.593  | 0.593 | 2.149 | 0.370 | 0.727 | 2.804  | -0.196 |
| Fe5-S1  | 2.356 | 2.120 | 0.370 | 0.528 |        |       | 2.149 | 0.370 | 0.572 |        |        |
| Fe5-S2B | 2.322 | 2.120 | 0.370 | 0.579 |        |       | 2.149 | 0.370 | 0.627 |        |        |
| Fe5-S4B | 2.252 | 2.120 | 0.370 | 0.700 |        |       | 2.149 | 0.370 | 0.757 |        |        |
| Fe5-SG  | 2.314 | 2.120 | 0.370 | 0.592 | 2.400  | 0.400 | 2.149 | 0.370 | 0.640 | 2.595  | -0.405 |
| Fe6-S1  | 2.603 | 2.120 | 0.370 | 0.271 |        |       | 2.149 | 0.370 | 0.293 |        |        |
| Fe6-S2B | 2.280 | 2.120 | 0.370 | 0.649 |        |       | 2.149 | 0.370 | 0.702 |        |        |
| Fe6-S3B | 2.327 | 2.120 | 0.370 | 0.572 |        |       | 2.149 | 0.370 | 0.618 |        |        |
| Fe6-SG  | 2.355 | 2.120 | 0.370 | 0.530 | 2.021  | 0.021 | 2.149 | 0.370 | 0.573 | 2.186  | -0.814 |
| Fe7-S2B | 2.297 | 2.120 | 0.370 | 0.620 |        |       | 2.149 | 0.370 | 0.670 |        |        |
| Fe7-S3B | 2.262 | 2.120 | 0.370 | 0.681 |        |       | 2.149 | 0.370 | 0.737 |        |        |
| Fe7-S4B | 2.300 | 2.120 | 0.370 | 0.615 |        |       | 2.149 | 0.370 | 0.665 |        |        |
| Fe7-SG  | 2.323 | 2.120 | 0.370 | 0.578 | 2.494  | 0.494 | 2.149 | 0.370 | 0.625 | 2.697  | -0.303 |
| Fe8-S1  | 2.306 | 2.120 | 0.370 | 0.605 |        |       | 2.149 | 0.370 | 0.654 |        |        |
| Fe8-S3B | 2.278 | 2.120 | 0.370 | 0.652 |        |       | 2.149 | 0.370 | 0.706 |        |        |
| Fe8-S4B | 2.330 | 2.120 | 0.370 | 0.567 |        |       | 2.149 | 0.370 | 0.613 |        |        |
| Fe8-SG  | 2.246 | 2.120 | 0.370 | 0.711 | 2.536  | 0.536 | 2.149 | 0.370 | 0.769 | 2.742  | -0.258 |
|         |       |       |       |       | 19.841 |       |       |       |       | 21.459 |        |

---

**Table S43** The adopted bond valence analyses for irons in P<sup>N</sup> [1] from MoFe protein 3U7Q which was reported as superposition of P<sup>N/2+</sup> at 1.0 Å resolution.

| Bond                  | $r_{ij}$ (Å) | $R_0$ (Å) | B (Å) | Bval  | Sum   | Diff.                 | $R_0$ (Å) | B (Å) | Bval  | Sum   | Diff.  |
|-----------------------|--------------|-----------|-------|-------|-------|-----------------------|-----------|-------|-------|-------|--------|
| expected valence = +2 |              |           |       |       |       | expected valence = +3 |           |       |       |       |        |
| Fe1-S1                | 2.389        | 2.120     | 0.370 | 0.483 |       |                       | 2.149     | 0.370 | 0.523 |       |        |
| Fe1-S2A               | 2.308        | 2.120     | 0.370 | 0.602 |       |                       | 2.149     | 0.370 | 0.651 |       |        |
| Fe1-S4A               | 2.311        | 2.120     | 0.370 | 0.597 |       |                       | 2.149     | 0.370 | 0.645 |       |        |
| Fe1-SG                | 2.323        | 2.120     | 0.370 | 0.578 | 2.259 | 0.259                 | 2.149     | 0.370 | 0.625 | 2.444 | -0.556 |
| Fe2-S1                | 2.484        | 2.120     | 0.370 | 0.374 |       |                       | 2.149     | 0.370 | 0.404 |       |        |
| Fe2-S2A               | 2.296        | 2.120     | 0.370 | 0.621 |       |                       | 2.149     | 0.370 | 0.672 |       |        |
| Fe2-S3A               | 2.277        | 2.120     | 0.370 | 0.654 |       |                       | 2.149     | 0.370 | 0.708 |       |        |
| Fe2-SG                | 2.341        | 2.120     | 0.370 | 0.550 | 2.200 | 0.200                 | 2.149     | 0.370 | 0.595 | 2.379 | -0.621 |
| Fe3-S2A               | 2.291        | 2.120     | 0.370 | 0.630 |       |                       | 2.149     | 0.370 | 0.681 |       |        |
| Fe3-S3A               | 2.313        | 2.120     | 0.370 | 0.594 |       |                       | 2.149     | 0.370 | 0.642 |       |        |
| Fe3-S4A               | 2.265        | 2.120     | 0.370 | 0.676 |       |                       | 2.149     | 0.370 | 0.731 |       |        |
| Fe3-SG                | 2.292        | 2.120     | 0.370 | 0.628 | 2.527 | 0.527                 | 2.149     | 0.370 | 0.679 | 2.734 | -0.266 |
| Fe4-S1                | 2.366        | 2.120     | 0.370 | 0.514 |       |                       | 2.149     | 0.370 | 0.556 |       |        |
| Fe4-S3A               | 2.296        | 2.120     | 0.370 | 0.621 |       |                       | 2.149     | 0.370 | 0.672 |       |        |
| Fe4-S4A               | 2.287        | 2.120     | 0.370 | 0.637 |       |                       | 2.149     | 0.370 | 0.689 |       |        |

|                          |       |       |       |       |                          |        |       |       |       |                          |        |
|--------------------------|-------|-------|-------|-------|--------------------------|--------|-------|-------|-------|--------------------------|--------|
| Fe4-SG                   | 2.314 | 2.120 | 0.370 | 0.592 | 2.365                    | 0.365  | 2.149 | 0.370 | 0.640 | 2.557                    | -0.443 |
| Fe5-S1(P <sup>N</sup> )  | 2.568 | 2.120 | 0.370 | 0.298 |                          |        | 2.149 | 0.370 | 0.322 |                          |        |
| Fe5-S2B(P <sup>N</sup> ) | 2.448 | 2.120 | 0.370 | 0.412 |                          |        | 2.149 | 0.370 | 0.446 |                          |        |
| Fe5-S4B(P <sup>N</sup> ) | 2.219 | 2.120 | 0.370 | 0.765 |                          |        | 2.149 | 0.370 | 0.828 |                          |        |
| Fe5-SG(P <sup>N</sup> )  | 2.296 | 2.120 | 0.370 | 0.621 | 2.097 (P <sup>N</sup> )  | 0.097  | 2.149 | 0.370 | 0.672 | 2.268 (P <sup>N</sup> )  | -0.732 |
| Fe6-S1(P <sup>N</sup> )  | 2.558 | 2.120 | 0.370 | 0.306 |                          |        | 2.149 | 0.370 | 0.331 |                          |        |
| Fe6-S2B(P <sup>N</sup> ) | 2.578 | 2.120 | 0.370 | 0.290 |                          |        | 2.149 | 0.370 | 0.314 |                          |        |
| Fe6-S3B(P <sup>N</sup> ) | 2.313 | 2.120 | 0.370 | 0.594 |                          |        | 2.149 | 0.370 | 0.642 |                          |        |
| Fe6-SG(P <sup>N</sup> )  | 2.248 | 2.120 | 0.370 | 0.708 | 1.897 (P <sup>N</sup> )  | -0.103 | 2.149 | 0.370 | 0.765 | 2.052 (P <sup>N</sup> )  | -0.948 |
| Fe7-S2B                  | 2.309 | 2.120 | 0.370 | 0.600 |                          |        | 2.149 | 0.370 | 0.649 |                          |        |
| Fe7-S3B                  | 2.320 | 2.120 | 0.370 | 0.582 |                          |        | 2.149 | 0.370 | 0.630 |                          |        |
| Fe7-S4B                  | 2.289 | 2.120 | 0.370 | 0.633 |                          |        | 2.149 | 0.370 | 0.685 |                          |        |
| Fe7-SG                   | 2.373 | 2.120 | 0.370 | 0.505 | 2.320                    | 0.320  | 2.149 | 0.370 | 0.546 | 2.510                    | -0.490 |
| Fe8-S1                   | 2.346 | 2.120 | 0.370 | 0.543 |                          |        | 2.149 | 0.370 | 0.587 |                          |        |
| Fe8-S3B                  | 2.283 | 2.120 | 0.370 | 0.644 |                          |        | 2.149 | 0.370 | 0.696 |                          |        |
| Fe8-S4B                  | 2.324 | 2.120 | 0.370 | 0.576 |                          |        | 2.149 | 0.370 | 0.623 |                          |        |
| Fe8-SG                   | 2.313 | 2.120 | 0.370 | 0.594 | 2.356                    | 0.356  | 2.149 | 0.370 | 0.642 | 2.548                    | -0.452 |
|                          |       |       |       |       | 18.022 (P <sup>N</sup> ) |        |       |       |       | 19.492 (P <sup>N</sup> ) |        |

---

**Table S44** The adopted bond valence analyses for irons in P<sup>N</sup> [2] from MoFe protein 3U7Q which was reported as superposition of P<sup>N/2+</sup> at 1.0 Å resolution.

| Bond                  | $r_{ij}$ (Å) | $R_0$ (Å) | B (Å) | Bval  | Sum   | Diff.                 | $R_0$ (Å) | B (Å) | Bval  | Sum   | Diff.  |
|-----------------------|--------------|-----------|-------|-------|-------|-----------------------|-----------|-------|-------|-------|--------|
| expected valence = +2 |              |           |       |       |       | expected valence = +3 |           |       |       |       |        |
| Fe1-S1                | 2.384        | 2.120     | 0.370 | 0.490 |       |                       | 2.149     | 0.370 | 0.530 |       |        |
| Fe1-S2A               | 2.307        | 2.120     | 0.370 | 0.603 |       |                       | 2.149     | 0.370 | 0.652 |       |        |
| Fe1-S4A               | 2.306        | 2.120     | 0.370 | 0.605 |       |                       | 2.149     | 0.370 | 0.654 |       |        |
| Fe1-SG                | 2.319        | 2.120     | 0.370 | 0.584 | 2.282 | 0.282                 | 2.149     | 0.370 | 0.632 | 2.468 | -0.532 |
| Fe2-S1                | 2.482        | 2.120     | 0.370 | 0.376 |       |                       | 2.149     | 0.370 | 0.407 |       |        |
| Fe2-S2A               | 2.302        | 2.120     | 0.370 | 0.611 |       |                       | 2.149     | 0.370 | 0.661 |       |        |
| Fe2-S3A               | 2.279        | 2.120     | 0.370 | 0.651 |       |                       | 2.149     | 0.370 | 0.704 |       |        |
| Fe2-SG                | 2.334        | 2.120     | 0.370 | 0.561 | 2.199 | 0.199                 | 2.149     | 0.370 | 0.607 | 2.378 | -0.622 |
| Fe3-S2A               | 2.287        | 2.120     | 0.370 | 0.637 |       |                       | 2.149     | 0.370 | 0.689 |       |        |
| Fe3-S3A               | 2.321        | 2.120     | 0.370 | 0.581 |       |                       | 2.149     | 0.370 | 0.628 |       |        |
| Fe3-S4A               | 2.264        | 2.120     | 0.370 | 0.678 |       |                       | 2.149     | 0.370 | 0.733 |       |        |
| Fe3-SG                | 2.287        | 2.120     | 0.370 | 0.637 | 2.532 | 0.532                 | 2.149     | 0.370 | 0.689 | 2.738 | -0.262 |
| Fe4-S1                | 2.356        | 2.120     | 0.370 | 0.528 |       |                       | 2.149     | 0.370 | 0.572 |       |        |
| Fe4-S3A               | 2.303        | 2.120     | 0.370 | 0.610 |       |                       | 2.149     | 0.370 | 0.660 |       |        |
| Fe4-S4A               | 2.287        | 2.120     | 0.370 | 0.637 |       |                       | 2.149     | 0.370 | 0.689 |       |        |



|                          |       |       |       |       |                          |        |       |       |       |                          |        |
|--------------------------|-------|-------|-------|-------|--------------------------|--------|-------|-------|-------|--------------------------|--------|
| Fe4-SG                   | 2.317 | 2.120 | 0.370 | 0.587 | 2.362                    | 0.362  | 2.149 | 0.370 | 0.635 | 2.555                    | -0.445 |
| Fe5-S1(P <sup>N</sup> )  | 2.634 | 2.120 | 0.370 | 0.249 |                          |        | 2.149 | 0.370 | 0.270 |                          |        |
| Fe5-S2B(P <sup>N</sup> ) | 2.444 | 2.120 | 0.370 | 0.417 |                          |        | 2.149 | 0.370 | 0.451 |                          |        |
| Fe5-S4B(P <sup>N</sup> ) | 2.198 | 2.120 | 0.370 | 0.810 |                          |        | 2.149 | 0.370 | 0.876 |                          |        |
| Fe5-SG(P <sup>N</sup> )  | 2.272 | 2.120 | 0.370 | 0.663 | 2.139 (P <sup>N</sup> )  | 0.139  | 2.149 | 0.370 | 0.717 | 2.313 (P <sup>N</sup> )  | -0.687 |
| Fe6-S1(P <sup>N</sup> )  | 2.559 | 2.120 | 0.370 | 0.305 |                          |        | 2.149 | 0.370 | 0.330 |                          |        |
| Fe6-S2B(P <sup>N</sup> ) | 2.551 | 2.120 | 0.370 | 0.312 |                          |        | 2.149 | 0.370 | 0.337 |                          |        |
| Fe6-S3B(P <sup>N</sup> ) | 2.326 | 2.120 | 0.370 | 0.573 |                          |        | 2.149 | 0.370 | 0.620 |                          |        |
| Fe6-SG(P <sup>N</sup> )  | 2.265 | 2.120 | 0.370 | 0.676 | 1.866 (P <sup>N</sup> )  | -0.134 | 2.149 | 0.370 | 0.731 | 2.018 (P <sup>N</sup> )  | -0.982 |
| Fe7-S2B                  | 2.317 | 2.120 | 0.370 | 0.587 |                          |        | 2.149 | 0.370 | 0.635 |                          |        |
| Fe7-S3B                  | 2.323 | 2.120 | 0.370 | 0.578 |                          |        | 2.149 | 0.370 | 0.625 |                          |        |
| Fe7-S4B                  | 2.292 | 2.120 | 0.370 | 0.628 |                          |        | 2.149 | 0.370 | 0.679 |                          |        |
| Fe7-SG                   | 2.368 | 2.120 | 0.370 | 0.512 | 2.305                    | 0.305  | 2.149 | 0.370 | 0.553 | 2.493                    | -0.507 |
| Fe8-S1                   | 2.357 | 2.120 | 0.370 | 0.527 |                          |        | 2.149 | 0.370 | 0.570 |                          |        |
| Fe8-S3B                  | 2.277 | 2.120 | 0.370 | 0.654 |                          |        | 2.149 | 0.370 | 0.708 |                          |        |
| Fe8-S4B                  | 2.322 | 2.120 | 0.370 | 0.579 |                          |        | 2.149 | 0.370 | 0.627 |                          |        |
| Fe8-SG                   | 2.314 | 2.120 | 0.370 | 0.592 | 2.352                    | 0.352  | 2.149 | 0.370 | 0.640 | 2.544                    | -0.456 |
|                          |       |       |       |       | 18.037 (P <sup>N</sup> ) |        |       |       |       | 19.508 (P <sup>N</sup> ) |        |

---

**Table S45** The adopted bond valence analyses for irons in P-cluster [1] from MoFe protein 4TKU which was reported as P<sup>N</sup> at 1.43 Å resolution.

| Bond                  | $r_{ij}$ (Å) | $R_0$ (Å) | B (Å) | Bval  | Sum   | Diff.                 | $R_0$ (Å) | B (Å) | Bval  | Sum   | Diff.  |
|-----------------------|--------------|-----------|-------|-------|-------|-----------------------|-----------|-------|-------|-------|--------|
| expected valence = +2 |              |           |       |       |       | expected valence = +3 |           |       |       |       |        |
| Fe1-S1                | 2.468        | 2.12      | 0.37  | 0.390 |       |                       | 2.149     | 0.37  | 0.422 |       |        |
| Fe1-S2A               | 2.291        | 2.12      | 0.37  | 0.630 |       |                       | 2.149     | 0.37  | 0.681 |       |        |
| Fe1-S3A               | 2.260        | 2.12      | 0.37  | 0.685 |       |                       | 2.149     | 0.37  | 0.741 |       |        |
| Fe1-SG                | 2.343        | 2.12      | 0.37  | 0.547 | 2.253 | 0.253                 | 2.149     | 0.37  | 0.592 | 2.436 | -0.564 |
| Fe2-S1                | 2.466        | 2.12      | 0.37  | 0.393 |       |                       | 2.149     | 0.37  | 0.425 |       |        |
| Fe2-S2A               | 2.284        | 2.12      | 0.37  | 0.642 |       |                       | 2.149     | 0.37  | 0.694 |       |        |
| Fe2-S4A               | 2.280        | 2.12      | 0.37  | 0.649 |       |                       | 2.149     | 0.37  | 0.702 |       |        |
| Fe2-SG                | 2.342        | 2.12      | 0.37  | 0.549 | 2.232 | 0.232                 | 2.149     | 0.37  | 0.594 | 2.414 | -0.586 |
| Fe3-S2A               | 2.290        | 2.12      | 0.37  | 0.632 |       |                       | 2.149     | 0.37  | 0.683 |       |        |
| Fe3-S3A               | 2.256        | 2.12      | 0.37  | 0.692 |       |                       | 2.149     | 0.37  | 0.749 |       |        |
| Fe3-S4A               | 2.331        | 2.12      | 0.37  | 0.565 |       |                       | 2.149     | 0.37  | 0.611 |       |        |
| Fe3-SG                | 2.280        | 2.12      | 0.37  | 0.649 | 2.538 | 0.538                 | 2.149     | 0.37  | 0.702 | 2.745 | -0.255 |
| Fe4-S1                | 2.383        | 2.12      | 0.37  | 0.491 |       |                       | 2.149     | 0.37  | 0.531 |       |        |
| Fe4-S3A               | 2.262        | 2.12      | 0.37  | 0.681 |       |                       | 2.149     | 0.37  | 0.737 |       |        |
| Fe4-S4A               | 2.293        | 2.12      | 0.37  | 0.627 |       |                       | 2.149     | 0.37  | 0.678 |       |        |

|         |       |      |      |       |        |       |       |      |       |        |        |
|---------|-------|------|------|-------|--------|-------|-------|------|-------|--------|--------|
| Fe4-SG  | 2.315 | 2.12 | 0.37 | 0.590 | 2.389  | 0.389 | 2.149 | 0.37 | 0.638 | 2.584  | -0.416 |
| Fe5-S1  | 2.413 | 2.12 | 0.37 | 0.453 |        |       | 2.149 | 0.37 | 0.490 |        |        |
| Fe5-S2B | 2.264 | 2.12 | 0.37 | 0.678 |        |       | 2.149 | 0.37 | 0.733 |        |        |
| Fe5-S4B | 2.317 | 2.12 | 0.37 | 0.587 |        |       | 2.149 | 0.37 | 0.635 |        |        |
| Fe5-SG  | 2.351 | 2.12 | 0.37 | 0.536 | 2.253  | 0.253 | 2.149 | 0.37 | 0.579 | 2.437  | -0.563 |
| Fe6-S1  | 2.465 | 2.12 | 0.37 | 0.394 |        |       | 2.149 | 0.37 | 0.426 |        |        |
| Fe6-S2B | 2.289 | 2.12 | 0.37 | 0.633 |        |       | 2.149 | 0.37 | 0.685 |        |        |
| Fe6-S3B | 2.339 | 2.12 | 0.37 | 0.553 |        |       | 2.149 | 0.37 | 0.598 |        |        |
| Fe6-SG  | 2.325 | 2.12 | 0.37 | 0.575 | 2.155  | 0.155 | 2.149 | 0.37 | 0.621 | 2.331  | -0.669 |
| Fe7-S2B | 2.298 | 2.12 | 0.37 | 0.618 |        |       | 2.149 | 0.37 | 0.669 |        |        |
| Fe7-S3B | 2.337 | 2.12 | 0.37 | 0.556 |        |       | 2.149 | 0.37 | 0.602 |        |        |
| Fe7-S4B | 2.332 | 2.12 | 0.37 | 0.564 |        |       | 2.149 | 0.37 | 0.610 |        |        |
| Fe7-SG  | 2.367 | 2.12 | 0.37 | 0.513 | 2.251  | 0.251 | 2.149 | 0.37 | 0.555 | 2.435  | -0.565 |
| Fe8-S1  | 2.406 | 2.12 | 0.37 | 0.462 |        |       | 2.149 | 0.37 | 0.499 |        |        |
| Fe8-S3B | 2.309 | 2.12 | 0.37 | 0.600 |        |       | 2.149 | 0.37 | 0.649 |        |        |
| Fe8-S4B | 2.302 | 2.12 | 0.37 | 0.611 |        |       | 2.149 | 0.37 | 0.661 |        |        |
| Fe8-SG  | 2.298 | 2.12 | 0.37 | 0.618 | 2.291  | 0.291 | 2.149 | 0.37 | 0.669 | 2.478  | -0.522 |
|         |       |      |      |       | 18.363 |       |       |      |       | 19.860 |        |

---

**Table S46** The adopted bond valence analyses for irons in P-cluster [2] from MoFe protein 4TKU which was reported as P<sup>N</sup> at 1.43 Å resolution.

| Bond                  | $r_{ij}$ (Å) | $R_0$ (Å) | B (Å) | Bval  | Sum   | Diff.                 | $R_0$ (Å) | B (Å) | Bval  | Sum   | Diff.  |
|-----------------------|--------------|-----------|-------|-------|-------|-----------------------|-----------|-------|-------|-------|--------|
| expected valence = +2 |              |           |       |       |       | expected valence = +3 |           |       |       |       |        |
| Fe1-S1                | 2.468        | 2.12      | 0.37  | 0.404 |       |                       | 2.149     | 0.37  | 0.437 |       |        |
| Fe1-S2A               | 2.291        | 2.12      | 0.37  | 0.649 |       |                       | 2.149     | 0.37  | 0.702 |       |        |
| Fe1-S3A               | 2.260        | 2.12      | 0.37  | 0.670 |       |                       | 2.149     | 0.37  | 0.725 |       |        |
| Fe1-SG                | 2.343        | 2.12      | 0.37  | 0.594 | 2.253 | 0.253                 | 2.149     | 0.37  | 0.642 | 2.436 | -0.564 |
| Fe2-S1                | 2.466        | 2.12      | 0.37  | 0.409 |       |                       | 2.149     | 0.37  | 0.442 |       |        |
| Fe2-S2A               | 2.284        | 2.12      | 0.37  | 0.621 |       |                       | 2.149     | 0.37  | 0.672 |       |        |
| Fe2-S4A               | 2.280        | 2.12      | 0.37  | 0.628 |       |                       | 2.149     | 0.37  | 0.679 |       |        |
| Fe2-SG                | 2.342        | 2.12      | 0.37  | 0.586 | 2.232 | 0.232                 | 2.149     | 0.37  | 0.633 | 2.414 | -0.586 |
| Fe3-S2A               | 2.290        | 2.12      | 0.37  | 0.623 |       |                       | 2.149     | 0.37  | 0.674 |       |        |
| Fe3-S3A               | 2.256        | 2.12      | 0.37  | 0.709 |       |                       | 2.149     | 0.37  | 0.767 |       |        |
| Fe3-S4A               | 2.331        | 2.12      | 0.37  | 0.567 |       |                       | 2.149     | 0.37  | 0.613 |       |        |
| Fe3-SG                | 2.280        | 2.12      | 0.37  | 0.663 | 2.538 | 0.538                 | 2.149     | 0.37  | 0.717 | 2.745 | -0.255 |
| Fe4-S1                | 2.383        | 2.12      | 0.37  | 0.481 |       |                       | 2.149     | 0.37  | 0.520 |       |        |
| Fe4-S3A               | 2.262        | 2.12      | 0.37  | 0.678 |       |                       | 2.149     | 0.37  | 0.733 |       |        |
| Fe4-S4A               | 2.293        | 2.12      | 0.37  | 0.642 |       |                       | 2.149     | 0.37  | 0.694 |       |        |

|         |       |      |      |       |        |       |       |      |       |        |        |
|---------|-------|------|------|-------|--------|-------|-------|------|-------|--------|--------|
| Fe4-SG  | 2.315 | 2.12 | 0.37 | 0.572 | 2.389  | 0.389 | 2.149 | 0.37 | 0.618 | 2.584  | -0.416 |
| Fe5-S1  | 2.413 | 2.12 | 0.37 | 0.448 |        |       | 2.149 | 0.37 | 0.485 |        |        |
| Fe5-S2B | 2.264 | 2.12 | 0.37 | 0.681 |        |       | 2.149 | 0.37 | 0.737 |        |        |
| Fe5-S4B | 2.317 | 2.12 | 0.37 | 0.594 |        |       | 2.149 | 0.37 | 0.642 |        |        |
| Fe5-SG  | 2.351 | 2.12 | 0.37 | 0.546 | 2.253  | 0.253 | 2.149 | 0.37 | 0.590 | 2.437  | -0.563 |
| Fe6-S1  | 2.465 | 2.12 | 0.37 | 0.384 |        |       | 2.149 | 0.37 | 0.415 |        |        |
| Fe6-S2B | 2.289 | 2.12 | 0.37 | 0.618 |        |       | 2.149 | 0.37 | 0.669 |        |        |
| Fe6-S3B | 2.339 | 2.12 | 0.37 | 0.556 |        |       | 2.149 | 0.37 | 0.602 |        |        |
| Fe6-SG  | 2.325 | 2.12 | 0.37 | 0.578 | 2.155  | 0.155 | 2.149 | 0.37 | 0.625 | 2.331  | -0.669 |
| Fe7-S2B | 2.298 | 2.12 | 0.37 | 0.620 |        |       | 2.149 | 0.37 | 0.670 |        |        |
| Fe7-S3B | 2.337 | 2.12 | 0.37 | 0.549 |        |       | 2.149 | 0.37 | 0.594 |        |        |
| Fe7-S4B | 2.332 | 2.12 | 0.37 | 0.558 |        |       | 2.149 | 0.37 | 0.603 |        |        |
| Fe7-SG  | 2.367 | 2.12 | 0.37 | 0.505 | 2.251  | 0.251 | 2.149 | 0.37 | 0.546 | 2.435  | -0.565 |
| Fe8-S1  | 2.406 | 2.12 | 0.37 | 0.485 |        |       | 2.149 | 0.37 | 0.524 |        |        |
| Fe8-S3B | 2.309 | 2.12 | 0.37 | 0.589 |        |       | 2.149 | 0.37 | 0.637 |        |        |
| Fe8-S4B | 2.302 | 2.12 | 0.37 | 0.628 |        |       | 2.149 | 0.37 | 0.679 |        |        |
| Fe8-SG  | 2.298 | 2.12 | 0.37 | 0.615 | 2.291  | 0.291 | 2.149 | 0.37 | 0.665 | 2.478  | -0.522 |
|         |       |      |      |       | 18.363 |       |       |      |       | 19.860 |        |

---

**Table S47** The adopted bond valence analyses for irons in P-cluster [1] from MoFe protein 4TKV which was reported as P<sup>N</sup> at 1.5 Å resolution.

| Bond                  | $r_{ij}$ (Å) | $R_0$ (Å) | B (Å) | Bval  | Sum   | Diff.                 | $R_0$ (Å) | B (Å) | Bval  | Sum   | Diff.  |
|-----------------------|--------------|-----------|-------|-------|-------|-----------------------|-----------|-------|-------|-------|--------|
| expected valence = +2 |              |           |       |       |       | expected valence = +3 |           |       |       |       |        |
| Fe1-S1                | 2.421        | 2.120     | 0.370 | 0.443 |       |                       | 2.149     | 0.370 | 0.479 |       |        |
| Fe1-S2A               | 2.303        | 2.120     | 0.370 | 0.610 |       |                       | 2.149     | 0.370 | 0.660 |       |        |
| Fe1-S3A               | 2.267        | 2.120     | 0.370 | 0.672 |       |                       | 2.149     | 0.370 | 0.727 |       |        |
| Fe1-SG                | 2.296        | 2.120     | 0.370 | 0.621 | 2.347 | 0.347                 | 2.149     | 0.370 | 0.672 | 2.538 | -0.462 |
| Fe2-S1                | 2.455        | 2.120     | 0.370 | 0.404 |       |                       | 2.149     | 0.370 | 0.437 |       |        |
| Fe2-S2A               | 2.294        | 2.120     | 0.370 | 0.625 |       |                       | 2.149     | 0.370 | 0.676 |       |        |
| Fe2-S4A               | 2.270        | 2.120     | 0.370 | 0.667 |       |                       | 2.149     | 0.370 | 0.721 |       |        |
| Fe2-SG                | 2.298        | 2.120     | 0.370 | 0.618 | 2.314 | 0.314                 | 2.149     | 0.370 | 0.669 | 2.503 | -0.497 |
| Fe3-S2A               | 2.279        | 2.120     | 0.370 | 0.651 |       |                       | 2.149     | 0.370 | 0.704 |       |        |
| Fe3-S3A               | 2.242        | 2.120     | 0.370 | 0.719 |       |                       | 2.149     | 0.370 | 0.778 |       |        |
| Fe3-S4A               | 2.336        | 2.120     | 0.370 | 0.558 |       |                       | 2.149     | 0.370 | 0.603 |       |        |
| Fe3-SG                | 2.283        | 2.120     | 0.370 | 0.644 | 2.571 | 0.571                 | 2.149     | 0.370 | 0.696 | 2.781 | -0.219 |
| Fe4-S1                | 2.379        | 2.120     | 0.370 | 0.497 |       |                       | 2.149     | 0.370 | 0.537 |       |        |
| Fe4-S3A               | 2.241        | 2.120     | 0.370 | 0.721 |       |                       | 2.149     | 0.370 | 0.780 |       |        |
| Fe4-S4A               | 2.295        | 2.120     | 0.370 | 0.623 |       |                       | 2.149     | 0.370 | 0.674 |       |        |

|         |       |       |       |       |        |       |       |       |       |        |        |
|---------|-------|-------|-------|-------|--------|-------|-------|-------|-------|--------|--------|
| Fe4-SG  | 2.322 | 2.120 | 0.370 | 0.579 | 2.420  | 0.420 | 2.149 | 0.370 | 0.627 | 2.617  | -0.383 |
| Fe5-S1  | 2.414 | 2.120 | 0.370 | 0.452 |        |       | 2.149 | 0.370 | 0.489 |        |        |
| Fe5-S2B | 2.234 | 2.120 | 0.370 | 0.735 |        |       | 2.149 | 0.370 | 0.795 |        |        |
| Fe5-S4B | 2.345 | 2.120 | 0.370 | 0.544 |        |       | 2.149 | 0.370 | 0.589 |        |        |
| Fe5-SG  | 2.312 | 2.120 | 0.370 | 0.595 | 2.326  | 0.326 | 2.149 | 0.370 | 0.644 | 2.516  | -0.484 |
| Fe6-S1  | 2.471 | 2.120 | 0.370 | 0.387 |        |       | 2.149 | 0.370 | 0.419 |        |        |
| Fe6-S2B | 2.278 | 2.120 | 0.370 | 0.652 |        |       | 2.149 | 0.370 | 0.706 |        |        |
| Fe6-S3B | 2.312 | 2.120 | 0.370 | 0.595 |        |       | 2.149 | 0.370 | 0.644 |        |        |
| Fe6-SG  | 2.340 | 2.120 | 0.370 | 0.552 | 2.187  | 0.187 | 2.149 | 0.370 | 0.597 | 2.365  | -0.635 |
| Fe7-S2B | 2.298 | 2.120 | 0.370 | 0.618 |        |       | 2.149 | 0.370 | 0.669 |        |        |
| Fe7-S3B | 2.326 | 2.120 | 0.370 | 0.573 |        |       | 2.149 | 0.370 | 0.620 |        |        |
| Fe7-S4B | 2.300 | 2.120 | 0.370 | 0.615 |        |       | 2.149 | 0.370 | 0.665 |        |        |
| Fe7-SG  | 2.370 | 2.120 | 0.370 | 0.509 | 2.315  | 0.315 | 2.149 | 0.370 | 0.550 | 2.504  | -0.496 |
| Fe8-S1  | 2.400 | 2.120 | 0.370 | 0.469 |        |       | 2.149 | 0.370 | 0.507 |        |        |
| Fe8-S3B | 2.275 | 2.120 | 0.370 | 0.658 |        |       | 2.149 | 0.370 | 0.711 |        |        |
| Fe8-S4B | 2.276 | 2.120 | 0.370 | 0.656 |        |       | 2.149 | 0.370 | 0.709 |        |        |
| Fe8-SG  | 2.305 | 2.120 | 0.370 | 0.607 | 2.389  | 0.389 | 2.149 | 0.370 | 0.656 | 2.584  | -0.416 |
|         |       |       |       |       | 18.869 |       |       |       |       | 20.408 |        |

---

**Table S48** The adopted bond valence analyses for irons in P-cluster [2] from MoFe protein 4TKV which was reported as P<sup>N</sup> at 1.5 Å resolution.

| Bond                  | $r_{ij}$ (Å) | $R_0$ (Å) | B (Å) | Bval  | Sum   | Diff.                 | $R_0$ (Å) | B (Å) | Bval  | Sum   | Diff.  |
|-----------------------|--------------|-----------|-------|-------|-------|-----------------------|-----------|-------|-------|-------|--------|
| expected valence = +2 |              |           |       |       |       | expected valence = +3 |           |       |       |       |        |
| Fe1-S1                | 2.430        | 2.120     | 0.370 | 0.433 |       |                       | 2.149     | 0.370 | 0.468 |       |        |
| Fe1-S2A               | 2.287        | 2.120     | 0.370 | 0.637 |       |                       | 2.149     | 0.370 | 0.689 |       |        |
| Fe1-S3A               | 2.263        | 2.120     | 0.370 | 0.679 |       |                       | 2.149     | 0.370 | 0.735 |       |        |
| Fe1-SG                | 2.325        | 2.120     | 0.370 | 0.575 | 2.323 | 0.323                 | 2.149     | 0.370 | 0.621 | 2.513 | -0.487 |
| Fe2-S1                | 2.431        | 2.120     | 0.370 | 0.431 |       |                       | 2.149     | 0.370 | 0.467 |       |        |
| Fe2-S2A               | 2.264        | 2.120     | 0.370 | 0.678 |       |                       | 2.149     | 0.370 | 0.733 |       |        |
| Fe2-S4A               | 2.271        | 2.120     | 0.370 | 0.665 |       |                       | 2.149     | 0.370 | 0.719 |       |        |
| Fe2-SG                | 2.317        | 2.120     | 0.370 | 0.587 | 2.361 | 0.361                 | 2.149     | 0.370 | 0.635 | 2.554 | -0.446 |
| Fe3-S2A               | 2.265        | 2.120     | 0.370 | 0.676 |       |                       | 2.149     | 0.370 | 0.731 |       |        |
| Fe3-S3A               | 2.244        | 2.120     | 0.370 | 0.715 |       |                       | 2.149     | 0.370 | 0.774 |       |        |
| Fe3-S4A               | 2.313        | 2.120     | 0.370 | 0.594 |       |                       | 2.149     | 0.370 | 0.642 |       |        |
| Fe3-SG                | 2.286        | 2.120     | 0.370 | 0.638 | 2.623 | 0.623                 | 2.149     | 0.370 | 0.691 | 2.837 | -0.163 |
| Fe4-S1                | 2.382        | 2.120     | 0.370 | 0.493 |       |                       | 2.149     | 0.370 | 0.533 |       |        |
| Fe4-S3A               | 2.251        | 2.120     | 0.370 | 0.702 |       |                       | 2.149     | 0.370 | 0.759 |       |        |
| Fe4-S4A               | 2.279        | 2.120     | 0.370 | 0.651 |       |                       | 2.149     | 0.370 | 0.704 |       |        |



|         |       |       |       |       |        |       |       |       |       |        |        |
|---------|-------|-------|-------|-------|--------|-------|-------|-------|-------|--------|--------|
| Fe4-SG  | 2.358 | 2.120 | 0.370 | 0.526 | 2.371  | 0.371 | 2.149 | 0.370 | 0.568 | 2.564  | -0.436 |
| Fe5-S1  | 2.431 | 2.120 | 0.370 | 0.431 |        |       | 2.149 | 0.370 | 0.467 |        |        |
| Fe5-S2B | 2.247 | 2.120 | 0.370 | 0.709 |        |       | 2.149 | 0.370 | 0.767 |        |        |
| Fe5-S4B | 2.313 | 2.120 | 0.370 | 0.594 |        |       | 2.149 | 0.370 | 0.642 |        |        |
| Fe5-SG  | 2.322 | 2.120 | 0.370 | 0.579 | 2.314  | 0.314 | 2.149 | 0.370 | 0.627 | 2.502  | -0.498 |
| Fe6-S1  | 2.491 | 2.120 | 0.370 | 0.367 |        |       | 2.149 | 0.370 | 0.397 |        |        |
| Fe6-S2B | 2.298 | 2.120 | 0.370 | 0.618 |        |       | 2.149 | 0.370 | 0.669 |        |        |
| Fe6-S3B | 2.341 | 2.120 | 0.370 | 0.550 |        |       | 2.149 | 0.370 | 0.595 |        |        |
| Fe6-SG  | 2.337 | 2.120 | 0.370 | 0.556 | 2.092  | 0.092 | 2.149 | 0.370 | 0.602 | 2.262  | -0.738 |
| Fe7-S2B | 2.304 | 2.120 | 0.370 | 0.608 |        |       | 2.149 | 0.370 | 0.658 |        |        |
| Fe7-S3B | 2.337 | 2.120 | 0.370 | 0.556 |        |       | 2.149 | 0.370 | 0.602 |        |        |
| Fe7-S4B | 2.334 | 2.120 | 0.370 | 0.561 |        |       | 2.149 | 0.370 | 0.607 |        |        |
| Fe7-SG  | 2.358 | 2.120 | 0.370 | 0.526 | 2.251  | 0.251 | 2.149 | 0.370 | 0.568 | 2.434  | -0.566 |
| Fe8-S1  | 2.406 | 2.120 | 0.370 | 0.462 |        |       | 2.149 | 0.370 | 0.499 |        |        |
| Fe8-S3B | 2.281 | 2.120 | 0.370 | 0.647 |        |       | 2.149 | 0.370 | 0.700 |        |        |
| Fe8-S4B | 2.290 | 2.120 | 0.370 | 0.632 |        |       | 2.149 | 0.370 | 0.683 |        |        |
| Fe8-SG  | 2.356 | 2.120 | 0.370 | 0.528 | 2.269  | 0.269 | 2.149 | 0.370 | 0.572 | 2.454  | -0.546 |
|         |       |       |       |       | 18.603 |       |       |       |       | 20.120 |        |

---

**Table S49** The adopted bond valence analyses for irons in P<sup>N</sup> [1] from MoFe protein 4WES which was reported as superposition of P<sup>N/2+</sup> at 1.08 Å resolution.

| Bond                  | $r_{ij}$ (Å) | $R_0$ (Å) | B (Å) | Bval  | Sum   | Diff.                 | $R_0$ (Å) | B (Å) | Bval  | Sum   | Diff.  |
|-----------------------|--------------|-----------|-------|-------|-------|-----------------------|-----------|-------|-------|-------|--------|
| expected valence = +2 |              |           |       |       |       | expected valence = +3 |           |       |       |       |        |
| Fe1-S1                | 2.373        | 2.120     | 0.370 | 0.505 |       |                       | 2.149     | 0.370 | 0.546 |       |        |
| Fe1-S2A               | 2.331        | 2.120     | 0.370 | 0.565 |       |                       | 2.149     | 0.370 | 0.611 |       |        |
| Fe1-S4A               | 2.330        | 2.120     | 0.370 | 0.567 |       |                       | 2.149     | 0.370 | 0.613 |       |        |
| Fe1-SG                | 2.321        | 2.120     | 0.370 | 0.581 | 2.218 | 0.218                 | 2.149     | 0.370 | 0.628 | 2.399 | -0.601 |
| Fe2-S1                | 2.468        | 2.120     | 0.370 | 0.390 |       |                       | 2.149     | 0.370 | 0.422 |       |        |
| Fe2-S2A               | 2.301        | 2.120     | 0.370 | 0.613 |       |                       | 2.149     | 0.370 | 0.663 |       |        |
| Fe2-S3A               | 2.301        | 2.120     | 0.370 | 0.613 |       |                       | 2.149     | 0.370 | 0.663 |       |        |
| Fe2-SG                | 2.363        | 2.120     | 0.370 | 0.519 | 2.135 | 0.135                 | 2.149     | 0.370 | 0.561 | 2.309 | -0.691 |
| Fe3-S2A               | 2.319        | 2.120     | 0.370 | 0.584 |       |                       | 2.149     | 0.370 | 0.632 |       |        |
| Fe3-S3A               | 2.330        | 2.120     | 0.370 | 0.567 |       |                       | 2.149     | 0.370 | 0.613 |       |        |
| Fe3-S4A               | 2.271        | 2.120     | 0.370 | 0.665 |       |                       | 2.149     | 0.370 | 0.719 |       |        |
| Fe3-SG                | 2.303        | 2.120     | 0.370 | 0.610 | 2.426 | 0.426                 | 2.149     | 0.370 | 0.660 | 2.623 | -0.377 |
| Fe4-S1                | 2.382        | 2.120     | 0.370 | 0.493 |       |                       | 2.149     | 0.370 | 0.533 |       |        |
| Fe4-S3A               | 2.318        | 2.120     | 0.370 | 0.586 |       |                       | 2.149     | 0.370 | 0.633 |       |        |
| Fe4-S4A               | 2.285        | 2.120     | 0.370 | 0.640 |       |                       | 2.149     | 0.370 | 0.692 |       |        |

|                          |       |       |       |       |                          |        |       |       |       |                          |        |
|--------------------------|-------|-------|-------|-------|--------------------------|--------|-------|-------|-------|--------------------------|--------|
| Fe4-SG                   | 2.338 | 2.120 | 0.370 | 0.555 | 2.273                    | 0.273  | 2.149 | 0.370 | 0.600 | 2.458                    | -0.542 |
| Fe5-S1(P <sup>N</sup> )  | 2.438 | 2.120 | 0.370 | 0.423 |                          |        | 2.149 | 0.370 | 0.458 |                          |        |
| Fe5-S2B(P <sup>N</sup> ) | 2.515 | 2.120 | 0.370 | 0.344 |                          |        | 2.149 | 0.370 | 0.372 |                          |        |
| Fe5-S4B(P <sup>N</sup> ) | 2.251 | 2.120 | 0.370 | 0.702 |                          |        | 2.149 | 0.370 | 0.759 |                          |        |
| Fe5-SG(P <sup>N</sup> )  | 2.321 | 2.120 | 0.370 | 0.581 | 2.050 (P <sup>N</sup> )  | 0.050  | 2.149 | 0.370 | 0.628 | 2.217 (P <sup>N</sup> )  | -0.783 |
| Fe6-S1(P <sup>N</sup> )  | 2.476 | 2.120 | 0.370 | 0.382 |                          |        | 2.149 | 0.370 | 0.413 |                          |        |
| Fe6-S2B(P <sup>N</sup> ) | 2.527 | 2.120 | 0.370 | 0.333 |                          |        | 2.149 | 0.370 | 0.360 |                          |        |
| Fe6-S3B(P <sup>N</sup> ) | 2.386 | 2.120 | 0.370 | 0.487 |                          |        | 2.149 | 0.370 | 0.527 |                          |        |
| Fe6-SG(P <sup>N</sup> )  | 2.302 | 2.120 | 0.370 | 0.611 | 1.814 (P <sup>N</sup> )  | -0.186 | 2.149 | 0.370 | 0.661 | 1.962 (P <sup>N</sup> )  | -1.038 |
| Fe7-S2B                  | 2.300 | 2.120 | 0.370 | 0.615 |                          |        | 2.149 | 0.370 | 0.665 |                          |        |
| Fe7-S3B                  | 2.317 | 2.120 | 0.370 | 0.587 |                          |        | 2.149 | 0.370 | 0.635 |                          |        |
| Fe7-S4B                  | 2.318 | 2.120 | 0.370 | 0.586 |                          |        | 2.149 | 0.370 | 0.633 |                          |        |
| Fe7-SG                   | 2.322 | 2.120 | 0.370 | 0.579 | 2.367                    | 0.367  | 2.149 | 0.370 | 0.627 | 2.560                    | -0.440 |
| Fe8-S1                   | 2.369 | 2.120 | 0.370 | 0.510 |                          |        | 2.149 | 0.370 | 0.552 |                          |        |
| Fe8-S3B                  | 2.271 | 2.120 | 0.370 | 0.665 |                          |        | 2.149 | 0.370 | 0.719 |                          |        |
| Fe8-S4B                  | 2.325 | 2.120 | 0.370 | 0.575 |                          |        | 2.149 | 0.370 | 0.621 |                          |        |
| Fe8-SG                   | 2.312 | 2.120 | 0.370 | 0.595 | 2.345                    | 0.345  | 2.149 | 0.370 | 0.644 | 2.536                    | -0.464 |
|                          |       |       |       |       | 17.627 (P <sup>N</sup> ) |        |       |       |       | 19.064 (P <sup>N</sup> ) |        |

---

**Table S50** The adopted bond valence analyses for irons in P<sup>N</sup> [2] from MoFe protein 4WES which was reported as superposition of P<sup>N/2+</sup> in 1.08 Å resolution.

| Bond                  | $r_{ij}$ (Å) | $R_0$ (Å) | B (Å) | Bval  | Sum   | Diff.                 | $R_0$ (Å) | B (Å) | Bval  | Sum   | Diff.  |
|-----------------------|--------------|-----------|-------|-------|-------|-----------------------|-----------|-------|-------|-------|--------|
| expected valence = +2 |              |           |       |       |       | expected valence = +3 |           |       |       |       |        |
| Fe1-S1                | 2.385        | 2.120     | 0.370 | 0.489 |       |                       | 2.149     | 0.370 | 0.528 |       |        |
| Fe1-S2A               | 2.334        | 2.120     | 0.370 | 0.561 |       |                       | 2.149     | 0.370 | 0.607 |       |        |
| Fe1-S4A               | 2.332        | 2.120     | 0.370 | 0.564 |       |                       | 2.149     | 0.370 | 0.610 |       |        |
| Fe1-SG                | 2.313        | 2.120     | 0.370 | 0.594 | 2.207 | 0.207                 | 2.149     | 0.370 | 0.642 | 2.387 | -0.613 |
| Fe2-S1                | 2.478        | 2.120     | 0.370 | 0.380 |       |                       | 2.149     | 0.370 | 0.411 |       |        |
| Fe2-S2A               | 2.294        | 2.120     | 0.370 | 0.625 |       |                       | 2.149     | 0.370 | 0.676 |       |        |
| Fe2-S3A               | 2.307        | 2.120     | 0.370 | 0.603 |       |                       | 2.149     | 0.370 | 0.652 |       |        |
| Fe2-SG                | 2.357        | 2.120     | 0.370 | 0.527 | 2.135 | 0.135                 | 2.149     | 0.370 | 0.570 | 2.309 | -0.691 |
| Fe3-S2A               | 2.320        | 2.120     | 0.370 | 0.582 |       |                       | 2.149     | 0.370 | 0.630 |       |        |
| Fe3-S3A               | 2.334        | 2.120     | 0.370 | 0.561 |       |                       | 2.149     | 0.370 | 0.607 |       |        |
| Fe3-S4A               | 2.283        | 2.120     | 0.370 | 0.644 |       |                       | 2.149     | 0.370 | 0.696 |       |        |
| Fe3-SG                | 2.293        | 2.120     | 0.370 | 0.627 | 2.413 | 0.413                 | 2.149     | 0.370 | 0.678 | 2.610 | -0.390 |
| Fe4-S1                | 2.388        | 2.120     | 0.370 | 0.485 |       |                       | 2.149     | 0.370 | 0.524 |       |        |
| Fe4-S3A               | 2.314        | 2.120     | 0.370 | 0.592 |       |                       | 2.149     | 0.370 | 0.640 |       |        |
| Fe4-S4A               | 2.278        | 2.120     | 0.370 | 0.652 |       |                       | 2.149     | 0.370 | 0.706 |       |        |

|                          |       |       |       |       |                          |        |       |       |       |                          |        |
|--------------------------|-------|-------|-------|-------|--------------------------|--------|-------|-------|-------|--------------------------|--------|
| Fe4-SG                   | 2.343 | 2.120 | 0.370 | 0.547 | 2.276                    | 0.276  | 2.149 | 0.370 | 0.592 | 2.462                    | -0.538 |
| Fe5-S1(P <sup>N</sup> )  | 2.412 | 2.120 | 0.370 | 0.454 |                          |        | 2.149 | 0.370 | 0.491 |                          |        |
| Fe5-S2B(P <sup>N</sup> ) | 2.502 | 2.120 | 0.370 | 0.356 |                          |        | 2.149 | 0.370 | 0.385 |                          |        |
| Fe5-S4B(P <sup>N</sup> ) | 2.251 | 2.120 | 0.370 | 0.702 |                          |        | 2.149 | 0.370 | 0.759 |                          |        |
| Fe5-SG(P <sup>N</sup> )  | 2.330 | 2.120 | 0.370 | 0.567 | 2.079 (P <sup>N</sup> )  | 0.079  | 2.149 | 0.370 | 0.613 | 2.249 (P <sup>N</sup> )  | -0.751 |
| Fe6-S1(P <sup>N</sup> )  | 2.413 | 2.120 | 0.370 | 0.453 |                          |        | 2.149 | 0.370 | 0.490 |                          |        |
| Fe6-S2B(P <sup>N</sup> ) | 2.553 | 2.120 | 0.370 | 0.310 |                          |        | 2.149 | 0.370 | 0.336 |                          |        |
| Fe6-S3B(P <sup>N</sup> ) | 2.383 | 2.120 | 0.370 | 0.491 |                          |        | 2.149 | 0.370 | 0.531 |                          |        |
| Fe6-SG(P <sup>N</sup> )  | 2.291 | 2.120 | 0.370 | 0.630 | 1.884 (P <sup>N</sup> )  | -0.116 | 2.149 | 0.370 | 0.681 | 2.038 (P <sup>N</sup> )  | -0.962 |
| Fe7-S2B                  | 2.299 | 2.120 | 0.370 | 0.616 |                          |        | 2.149 | 0.370 | 0.667 |                          |        |
| Fe7-S3B                  | 2.317 | 2.120 | 0.370 | 0.587 |                          |        | 2.149 | 0.370 | 0.635 |                          |        |
| Fe7-S4B                  | 2.309 | 2.120 | 0.370 | 0.600 |                          |        | 2.149 | 0.370 | 0.649 |                          |        |
| Fe7-SG                   | 2.329 | 2.120 | 0.370 | 0.568 | 2.372                    | 0.372  | 2.149 | 0.370 | 0.615 | 2.565                    | -0.435 |
| Fe8-S1                   | 2.363 | 2.120 | 0.370 | 0.519 |                          |        | 2.149 | 0.370 | 0.561 |                          |        |
| Fe8-S3B                  | 2.274 | 2.120 | 0.370 | 0.660 |                          |        | 2.149 | 0.370 | 0.713 |                          |        |
| Fe8-S4B                  | 2.317 | 2.120 | 0.370 | 0.587 |                          |        | 2.149 | 0.370 | 0.635 |                          |        |
| Fe8-SG                   | 2.304 | 2.120 | 0.370 | 0.608 | 2.373                    | 0.373  | 2.149 | 0.370 | 0.658 | 2.567                    | -0.433 |
|                          |       |       |       |       | 17.741 (P <sup>N</sup> ) |        |       |       |       | 19.187 (P <sup>N</sup> ) |        |

---

**Table S51** The adopted bond valence analyses for irons in P<sup>N</sup> [1] from MoFe protein 4WNA which resemble superposition of P<sup>N/2+</sup> at 2.0 Å resolution.

| Bond                  | $r_{ij}$ (Å) | $R_0$ (Å) | B (Å) | Bval  | Sum   | Diff.                 | $R_0$ (Å) | B (Å) | Bval  | Sum   | Diff.  |
|-----------------------|--------------|-----------|-------|-------|-------|-----------------------|-----------|-------|-------|-------|--------|
| expected valence = +2 |              |           |       |       |       | expected valence = +3 |           |       |       |       |        |
| Fe1-S1                | 2.450        | 2.120     | 0.370 | 0.410 |       |                       | 2.149     | 0.370 | 0.443 |       |        |
| Fe1-S2A               | 2.267        | 2.120     | 0.370 | 0.672 |       |                       | 2.149     | 0.370 | 0.727 |       |        |
| Fe1-S4A               | 2.314        | 2.120     | 0.370 | 0.592 |       |                       | 2.149     | 0.370 | 0.640 |       |        |
| Fe1-SG                | 2.359        | 2.120     | 0.370 | 0.524 | 2.198 | 0.198                 | 2.149     | 0.370 | 0.567 | 2.377 | -0.623 |
| Fe2-S1                | 2.402        | 2.120     | 0.370 | 0.467 |       |                       | 2.149     | 0.370 | 0.505 |       |        |
| Fe2-S2A               | 2.289        | 2.120     | 0.370 | 0.633 |       |                       | 2.149     | 0.370 | 0.685 |       |        |
| Fe2-S3A               | 2.285        | 2.120     | 0.370 | 0.640 |       |                       | 2.149     | 0.370 | 0.692 |       |        |
| Fe2-SG                | 2.374        | 2.120     | 0.370 | 0.503 | 2.244 | 0.244                 | 2.149     | 0.370 | 0.544 | 2.426 | -0.574 |
| Fe3-S2A               | 2.281        | 2.120     | 0.370 | 0.647 |       |                       | 2.149     | 0.370 | 0.700 |       |        |
| Fe3-S3A               | 2.250        | 2.120     | 0.370 | 0.704 |       |                       | 2.149     | 0.370 | 0.761 |       |        |
| Fe3-S4A               | 2.303        | 2.120     | 0.370 | 0.610 |       |                       | 2.149     | 0.370 | 0.660 |       |        |
| Fe3-SG                | 2.293        | 2.120     | 0.370 | 0.627 | 2.587 | 0.587                 | 2.149     | 0.370 | 0.678 | 2.798 | -0.202 |
| Fe4-S1                | 2.357        | 2.120     | 0.370 | 0.527 |       |                       | 2.149     | 0.370 | 0.570 |       |        |
| Fe4-S3A               | 2.237        | 2.120     | 0.370 | 0.729 |       |                       | 2.149     | 0.370 | 0.788 |       |        |
| Fe4-S4A               | 2.300        | 2.120     | 0.370 | 0.615 |       |                       | 2.149     | 0.370 | 0.665 |       |        |

|                          |       |       |       |       |                          |        |       |       |       |                          |        |
|--------------------------|-------|-------|-------|-------|--------------------------|--------|-------|-------|-------|--------------------------|--------|
| Fe4-SG                   | 2.242 | 2.120 | 0.370 | 0.719 | 2.590                    | 0.590  | 2.149 | 0.370 | 0.778 | 2.801                    | -0.199 |
| Fe5-S1(P <sup>N</sup> )  | 3.331 | 2.120 | 0.370 | 0.038 |                          |        | 2.149 | 0.370 | 0.041 |                          |        |
| Fe5-S2B(P <sup>N</sup> ) | 2.236 | 2.120 | 0.370 | 0.731 |                          |        | 2.149 | 0.370 | 0.790 |                          |        |
| Fe5-S4B(P <sup>N</sup> ) | 2.266 | 2.120 | 0.370 | 0.674 |                          |        | 2.149 | 0.370 | 0.729 |                          |        |
| Fe5-SG(P <sup>N</sup> )  | 2.244 | 2.120 | 0.370 | 0.715 | 2.158 (P <sup>N</sup> )  | 0.158  | 2.149 | 0.370 | 0.774 | 2.334 (P <sup>N</sup> )  | -0.666 |
| Fe6-S1(P <sup>N</sup> )  | 3.483 | 2.120 | 0.370 | 0.025 |                          |        | 2.149 | 0.370 | 0.027 |                          |        |
| Fe6-S2B(P <sup>N</sup> ) | 2.297 | 2.120 | 0.370 | 0.620 |                          |        | 2.149 | 0.370 | 0.670 |                          |        |
| Fe6-S3B(P <sup>N</sup> ) | 2.278 | 2.120 | 0.370 | 0.652 |                          |        | 2.149 | 0.370 | 0.706 |                          |        |
| Fe6-SG(P <sup>N</sup> )  | 2.299 | 2.120 | 0.370 | 0.616 | 1.914 (P <sup>N</sup> )  | -0.086 | 2.149 | 0.370 | 0.667 | 2.070 (P <sup>N</sup> )  | -0.930 |
| Fe7-S2B                  | 2.249 | 2.120 | 0.370 | 0.706 |                          |        | 2.149 | 0.370 | 0.763 |                          |        |
| Fe7-S3B                  | 2.293 | 2.120 | 0.370 | 0.627 |                          |        | 2.149 | 0.370 | 0.678 |                          |        |
| Fe7-S4B                  | 2.275 | 2.120 | 0.370 | 0.658 |                          |        | 2.149 | 0.370 | 0.711 |                          |        |
| Fe7-SG                   | 2.487 | 2.120 | 0.370 | 0.371 | 2.361                    | 0.361  | 2.149 | 0.370 | 0.401 | 2.553                    | -0.447 |
| Fe8-S1                   | 2.382 | 2.120 | 0.370 | 0.493 |                          |        | 2.149 | 0.370 | 0.533 |                          |        |
| Fe8-S3B                  | 2.303 | 2.120 | 0.370 | 0.610 |                          |        | 2.149 | 0.370 | 0.660 |                          |        |
| Fe8-S4B                  | 2.300 | 2.120 | 0.370 | 0.615 |                          |        | 2.149 | 0.370 | 0.665 |                          |        |
| Fe8-SG                   | 2.221 | 2.120 | 0.370 | 0.761 | 2.478                    | 0.478  | 2.149 | 0.370 | 0.823 | 2.680                    | -0.320 |
|                          |       |       |       |       | 18.530 (P <sup>N</sup> ) |        |       |       |       | 20.040 (P <sup>N</sup> ) |        |

---

**Table S52** The adopted bond valence analyses for irons in P<sup>N</sup> [2] from MoFe protein 4WNA which resemble superposition of P<sup>N/2+</sup> at 2.0 Å resolution.

| Bond                  | $r_{ij}$ (Å) | $R_0$ (Å) | B (Å) | Bval  | Sum   | Diff.                 | $R_0$ (Å) | B (Å) | Bval  | Sum   | Diff.  |
|-----------------------|--------------|-----------|-------|-------|-------|-----------------------|-----------|-------|-------|-------|--------|
| expected valence = +2 |              |           |       |       |       | expected valence = +3 |           |       |       |       |        |
| Fe1-S1                | 2.467        | 2.120     | 0.370 | 0.391 |       |                       | 2.149     | 0.370 | 0.423 |       |        |
| Fe1-S2A               | 2.279        | 2.120     | 0.370 | 0.651 |       |                       | 2.149     | 0.370 | 0.704 |       |        |
| Fe1-S4A               | 2.304        | 2.120     | 0.370 | 0.608 |       |                       | 2.149     | 0.370 | 0.658 |       |        |
| Fe1-SG                | 2.397        | 2.120     | 0.370 | 0.473 | 2.123 | 0.123                 | 2.149     | 0.370 | 0.512 | 2.296 | -0.704 |
| Fe2-S1                | 2.369        | 2.120     | 0.370 | 0.510 |       |                       | 2.149     | 0.370 | 0.552 |       |        |
| Fe2-S2A               | 2.258        | 2.120     | 0.370 | 0.689 |       |                       | 2.149     | 0.370 | 0.745 |       |        |
| Fe2-S3A               | 2.268        | 2.120     | 0.370 | 0.670 |       |                       | 2.149     | 0.370 | 0.725 |       |        |
| Fe2-SG                | 2.349        | 2.120     | 0.370 | 0.539 | 2.408 | 0.408                 | 2.149     | 0.370 | 0.582 | 2.604 | -0.396 |
| Fe3-S2A               | 2.294        | 2.120     | 0.370 | 0.625 |       |                       | 2.149     | 0.370 | 0.676 |       |        |
| Fe3-S3A               | 2.228        | 2.120     | 0.370 | 0.747 |       |                       | 2.149     | 0.370 | 0.808 |       |        |
| Fe3-S4A               | 2.280        | 2.120     | 0.370 | 0.649 |       |                       | 2.149     | 0.370 | 0.702 |       |        |
| Fe3-SG                | 2.241        | 2.120     | 0.370 | 0.721 | 2.742 | 0.742                 | 2.149     | 0.370 | 0.780 | 2.965 | -0.035 |
| Fe4-S1                | 2.333        | 2.120     | 0.370 | 0.562 |       |                       | 2.149     | 0.370 | 0.608 |       |        |
| Fe4-S3A               | 2.255        | 2.120     | 0.370 | 0.694 |       |                       | 2.149     | 0.370 | 0.751 |       |        |
| Fe4-S4A               | 2.307        | 2.120     | 0.370 | 0.603 |       |                       | 2.149     | 0.370 | 0.652 |       |        |



|                          |       |       |       |       |                          |        |       |       |       |                          |        |
|--------------------------|-------|-------|-------|-------|--------------------------|--------|-------|-------|-------|--------------------------|--------|
| Fe4-SG                   | 2.237 | 2.120 | 0.370 | 0.729 | 2.589                    | 0.589  | 2.149 | 0.370 | 0.788 | 2.800                    | -0.200 |
| Fe5-S1(P <sup>N</sup> )  | 3.353 | 2.120 | 0.370 | 0.036 |                          |        | 2.149 | 0.370 | 0.039 |                          |        |
| Fe5-S2B(P <sup>N</sup> ) | 2.226 | 2.120 | 0.370 | 0.751 |                          |        | 2.149 | 0.370 | 0.812 |                          |        |
| Fe5-S4B(P <sup>N</sup> ) | 2.278 | 2.120 | 0.370 | 0.652 |                          |        | 2.149 | 0.370 | 0.706 |                          |        |
| Fe5-SG(P <sup>N</sup> )  | 2.213 | 2.120 | 0.370 | 0.778 | 2.217 (P <sup>N</sup> )  | 0.217  | 2.149 | 0.370 | 0.841 | 2.398 (P <sup>N</sup> )  | -0.602 |
| Fe6-S1(P <sup>N</sup> )  | 3.401 | 2.120 | 0.370 | 0.031 |                          |        | 2.149 | 0.370 | 0.034 |                          |        |
| Fe6-S2B(P <sup>N</sup> ) | 2.310 | 2.120 | 0.370 | 0.598 |                          |        | 2.149 | 0.370 | 0.647 |                          |        |
| Fe6-S3B(P <sup>N</sup> ) | 2.288 | 2.120 | 0.370 | 0.635 |                          |        | 2.149 | 0.370 | 0.687 |                          |        |
| Fe6-SG(P <sup>N</sup> )  | 2.251 | 2.120 | 0.370 | 0.702 | 1.967 (P <sup>N</sup> )  | -0.033 | 2.149 | 0.370 | 0.759 | 2.127 (P <sup>N</sup> )  | -0.873 |
| Fe7-S2B                  | 2.308 | 2.120 | 0.370 | 0.602 |                          |        | 2.149 | 0.370 | 0.651 |                          |        |
| Fe7-S3B                  | 2.294 | 2.120 | 0.370 | 0.625 |                          |        | 2.149 | 0.370 | 0.676 |                          |        |
| Fe7-S4B                  | 2.260 | 2.120 | 0.370 | 0.685 |                          |        | 2.149 | 0.370 | 0.741 |                          |        |
| Fe7-SG                   | 2.375 | 2.120 | 0.370 | 0.502 | 2.413                    | 0.413  | 2.149 | 0.370 | 0.543 | 2.610                    | -0.390 |
| Fe8-S1                   | 2.374 | 2.120 | 0.370 | 0.503 |                          |        | 2.149 | 0.370 | 0.544 |                          |        |
| Fe8-S3B                  | 2.294 | 2.120 | 0.370 | 0.625 |                          |        | 2.149 | 0.370 | 0.676 |                          |        |
| Fe8-S4B                  | 2.296 | 2.120 | 0.370 | 0.621 |                          |        | 2.149 | 0.370 | 0.672 |                          |        |
| Fe8-SG                   | 2.280 | 2.120 | 0.370 | 0.649 | 2.399                    | 0.399  | 2.149 | 0.370 | 0.702 | 2.594                    | -0.406 |
|                          |       |       |       |       | 18.857 (P <sup>N</sup> ) |        |       |       |       | 20.394 (P <sup>N</sup> ) |        |

---

**Table S53** The adopted bond valence analyses for irons in P-cluster [1] from MoFe protein 4WZA which was reported as P<sup>N</sup> at 1.9 Å resolution.

| Bond                  | $r_{ij}$ (Å) | $R_0$ (Å) | B (Å) | Bval  | Sum   | Diff.                 | $R_0$ (Å) | B (Å) | Bval  | Sum   | Diff.  |
|-----------------------|--------------|-----------|-------|-------|-------|-----------------------|-----------|-------|-------|-------|--------|
| expected valence = +2 |              |           |       |       |       | expected valence = +3 |           |       |       |       |        |
| Fe1-S1                | 2.495        | 2.120     | 0.370 | 0.363 |       |                       | 2.149     | 0.370 | 0.393 |       |        |
| Fe1-S2A               | 2.299        | 2.120     | 0.370 | 0.616 |       |                       | 2.149     | 0.370 | 0.667 |       |        |
| Fe1-S3A               | 2.257        | 2.120     | 0.370 | 0.691 |       |                       | 2.149     | 0.370 | 0.747 |       |        |
| Fe1-SG                | 2.445        | 2.120     | 0.370 | 0.415 | 2.085 | 0.085                 | 2.149     | 0.370 | 0.449 | 2.255 | -0.745 |
| Fe2-S1                | 2.461        | 2.120     | 0.370 | 0.398 |       |                       | 2.149     | 0.370 | 0.430 |       |        |
| Fe2-S2A               | 2.307        | 2.120     | 0.370 | 0.603 |       |                       | 2.149     | 0.370 | 0.652 |       |        |
| Fe2-S4A               | 2.292        | 2.120     | 0.370 | 0.628 |       |                       | 2.149     | 0.370 | 0.679 |       |        |
| Fe2-SG                | 2.425        | 2.120     | 0.370 | 0.439 | 2.068 | 0.068                 | 2.149     | 0.370 | 0.474 | 2.236 | -0.764 |
| Fe3-S2A               | 2.309        | 2.120     | 0.370 | 0.600 |       |                       | 2.149     | 0.370 | 0.649 |       |        |
| Fe3-S3A               | 2.331        | 2.120     | 0.370 | 0.565 |       |                       | 2.149     | 0.370 | 0.611 |       |        |
| Fe3-S4A               | 2.323        | 2.120     | 0.370 | 0.578 |       |                       | 2.149     | 0.370 | 0.625 |       |        |
| Fe3-SG                | 2.369        | 2.120     | 0.370 | 0.510 | 2.253 | 0.253                 | 2.149     | 0.370 | 0.552 | 2.437 | -0.563 |
| Fe4-S1                | 2.390        | 2.120     | 0.370 | 0.482 |       |                       | 2.149     | 0.370 | 0.521 |       |        |
| Fe4-S3A               | 2.270        | 2.120     | 0.370 | 0.667 |       |                       | 2.149     | 0.370 | 0.721 |       |        |
| Fe4-S4A               | 2.253        | 2.120     | 0.370 | 0.698 |       |                       | 2.149     | 0.370 | 0.755 |       |        |

|         |       |       |       |       |        |       |       |       |       |        |        |
|---------|-------|-------|-------|-------|--------|-------|-------|-------|-------|--------|--------|
| Fe4-SG  | 2.414 | 2.120 | 0.370 | 0.452 | 2.299  | 0.299 | 2.149 | 0.370 | 0.489 | 2.486  | -0.514 |
| Fe5-S1  | 2.400 | 2.120 | 0.370 | 0.469 |        |       | 2.149 | 0.370 | 0.507 |        |        |
| Fe5-S2B | 2.329 | 2.120 | 0.370 | 0.568 |        |       | 2.149 | 0.370 | 0.615 |        |        |
| Fe5-S4B | 2.250 | 2.120 | 0.370 | 0.704 |        |       | 2.149 | 0.370 | 0.761 |        |        |
| Fe5-SG  | 2.397 | 2.120 | 0.370 | 0.473 | 2.214  | 0.214 | 2.149 | 0.370 | 0.512 | 2.395  | -0.605 |
| Fe6-S1  | 2.488 | 2.120 | 0.370 | 0.370 |        |       | 2.149 | 0.370 | 0.400 |        |        |
| Fe6-S2B | 2.297 | 2.120 | 0.370 | 0.620 |        |       | 2.149 | 0.370 | 0.670 |        |        |
| Fe6-S3B | 2.352 | 2.120 | 0.370 | 0.534 |        |       | 2.149 | 0.370 | 0.578 |        |        |
| Fe6-SG  | 2.394 | 2.120 | 0.370 | 0.477 | 2.001  | 0.001 | 2.149 | 0.370 | 0.516 | 2.164  | -0.836 |
| Fe7-S2B | 2.363 | 2.120 | 0.370 | 0.519 |        |       | 2.149 | 0.370 | 0.561 |        |        |
| Fe7-S3B | 2.336 | 2.120 | 0.370 | 0.558 |        |       | 2.149 | 0.370 | 0.603 |        |        |
| Fe7-S4B | 2.361 | 2.120 | 0.370 | 0.521 |        |       | 2.149 | 0.370 | 0.564 |        |        |
| Fe7-SG  | 2.416 | 2.120 | 0.370 | 0.449 | 2.047  | 0.047 | 2.149 | 0.370 | 0.486 | 2.214  | -0.786 |
| Fe8-S1  | 2.412 | 2.120 | 0.370 | 0.454 |        |       | 2.149 | 0.370 | 0.491 |        |        |
| Fe8-S3B | 2.359 | 2.120 | 0.370 | 0.524 |        |       | 2.149 | 0.370 | 0.567 |        |        |
| Fe8-S4B | 2.244 | 2.120 | 0.370 | 0.715 |        |       | 2.149 | 0.370 | 0.774 |        |        |
| Fe8-SG  | 2.369 | 2.120 | 0.370 | 0.510 | 2.204  | 0.204 | 2.149 | 0.370 | 0.552 | 2.383  | -0.617 |
|         |       |       |       |       | 17.171 |       |       |       |       | 18.571 |        |

**Table S54** The adopted bond valence analyses for irons in P-cluster [2] from MoFe protein 4WZA which was reported as P<sup>N</sup> at 1.9 Å resolution.

| Bond                  | $r_{ij}$ (Å) | $R_0$ (Å) | B (Å) | Bval  | Sum   | Diff.                 | $R_0$ (Å) | B (Å) | Bval  | Sum   | Diff.  |
|-----------------------|--------------|-----------|-------|-------|-------|-----------------------|-----------|-------|-------|-------|--------|
| expected valence = +2 |              |           |       |       |       | expected valence = +3 |           |       |       |       |        |
| Fe1-S1                | 2.464        | 2.120     | 0.370 | 0.395 |       |                       | 2.149     | 0.370 | 0.427 |       |        |
| Fe1-S2A               | 2.300        | 2.120     | 0.370 | 0.615 |       |                       | 2.149     | 0.370 | 0.665 |       |        |
| Fe1-S3A               | 2.267        | 2.120     | 0.370 | 0.672 |       |                       | 2.149     | 0.370 | 0.727 |       |        |
| Fe1-SG                | 2.426        | 2.120     | 0.370 | 0.437 | 2.119 | 0.119                 | 2.149     | 0.370 | 0.473 | 2.292 | -0.708 |
| Fe2-S1                | 2.462        | 2.120     | 0.370 | 0.397 |       |                       | 2.149     | 0.370 | 0.429 |       |        |
| Fe2-S2A               | 2.322        | 2.120     | 0.370 | 0.579 |       |                       | 2.149     | 0.370 | 0.627 |       |        |
| Fe2-S4A               | 2.273        | 2.120     | 0.370 | 0.661 |       |                       | 2.149     | 0.370 | 0.715 |       |        |
| Fe2-SG                | 2.413        | 2.120     | 0.370 | 0.453 | 2.090 | 0.090                 | 2.149     | 0.370 | 0.490 | 2.261 | -0.739 |
| Fe3-S2A               | 2.307        | 2.120     | 0.370 | 0.603 |       |                       | 2.149     | 0.370 | 0.652 |       |        |
| Fe3-S3A               | 2.311        | 2.120     | 0.370 | 0.597 |       |                       | 2.149     | 0.370 | 0.645 |       |        |
| Fe3-S4A               | 2.329        | 2.120     | 0.370 | 0.568 |       |                       | 2.149     | 0.370 | 0.615 |       |        |
| Fe3-SG                | 2.348        | 2.120     | 0.370 | 0.540 | 2.308 | 0.308                 | 2.149     | 0.370 | 0.584 | 2.497 | -0.503 |
| Fe4-S1                | 2.377        | 2.120     | 0.370 | 0.499 |       |                       | 2.149     | 0.370 | 0.540 |       |        |
| Fe4-S3A               | 2.267        | 2.120     | 0.370 | 0.672 |       |                       | 2.149     | 0.370 | 0.727 |       |        |
| Fe4-S4A               | 2.271        | 2.120     | 0.370 | 0.665 |       |                       | 2.149     | 0.370 | 0.719 |       |        |

|         |       |       |       |       |        |        |       |       |       |        |        |
|---------|-------|-------|-------|-------|--------|--------|-------|-------|-------|--------|--------|
| Fe4-SG  | 2.428 | 2.120 | 0.370 | 0.435 | 2.271  | 0.271  | 2.149 | 0.370 | 0.470 | 2.456  | -0.544 |
| Fe5-S1  | 2.414 | 2.120 | 0.370 | 0.452 |        |        | 2.149 | 0.370 | 0.489 |        |        |
| Fe5-S2B | 2.334 | 2.120 | 0.370 | 0.561 |        |        | 2.149 | 0.370 | 0.607 |        |        |
| Fe5-S4B | 2.272 | 2.120 | 0.370 | 0.663 |        |        | 2.149 | 0.370 | 0.717 |        |        |
| Fe5-SG  | 2.415 | 2.120 | 0.370 | 0.451 | 2.126  | 0.126  | 2.149 | 0.370 | 0.487 | 2.300  | -0.700 |
| Fe6-S1  | 2.488 | 2.120 | 0.370 | 0.370 |        |        | 2.149 | 0.370 | 0.400 |        |        |
| Fe6-S2B | 2.314 | 2.120 | 0.370 | 0.592 |        |        | 2.149 | 0.370 | 0.640 |        |        |
| Fe6-S3B | 2.335 | 2.120 | 0.370 | 0.559 |        |        | 2.149 | 0.370 | 0.605 |        |        |
| Fe6-SG  | 2.402 | 2.120 | 0.370 | 0.467 | 1.988  | -0.012 | 2.149 | 0.370 | 0.505 | 2.150  | -0.850 |
| Fe7-S2B | 2.359 | 2.120 | 0.370 | 0.524 |        |        | 2.149 | 0.370 | 0.567 |        |        |
| Fe7-S3B | 2.352 | 2.120 | 0.370 | 0.534 |        |        | 2.149 | 0.370 | 0.578 |        |        |
| Fe7-S4B | 2.369 | 2.120 | 0.370 | 0.510 |        |        | 2.149 | 0.370 | 0.552 |        |        |
| Fe7-SG  | 2.416 | 2.120 | 0.370 | 0.449 | 2.018  | 0.018  | 2.149 | 0.370 | 0.486 | 2.182  | -0.818 |
| Fe8-S1  | 2.403 | 2.120 | 0.370 | 0.465 |        |        | 2.149 | 0.370 | 0.503 |        |        |
| Fe8-S3B | 2.325 | 2.120 | 0.370 | 0.575 |        |        | 2.149 | 0.370 | 0.621 |        |        |
| Fe8-S4B | 2.254 | 2.120 | 0.370 | 0.696 |        |        | 2.149 | 0.370 | 0.753 |        |        |
| Fe8-SG  | 2.426 | 2.120 | 0.370 | 0.437 | 2.174  | 0.174  | 2.149 | 0.370 | 0.473 | 2.351  | -0.649 |
|         |       |       |       |       | 17.094 |        |       |       |       | 18.488 |        |

**Table S55** The adopted bond valence analyses for irons in P-cluster [1] from MoFe protein 4WZB which was reported as P<sup>N</sup> at 1.9 Å resolution.

| Bond                  | $r_{ij}$ (Å) | $R_0$ (Å) | B (Å) | Bval  | Sum   | Diff.                 | $R_0$ (Å) | B (Å) | Bval  | Sum   | Diff.  |
|-----------------------|--------------|-----------|-------|-------|-------|-----------------------|-----------|-------|-------|-------|--------|
| expected valence = +2 |              |           |       |       |       | expected valence = +3 |           |       |       |       |        |
| Fe1-S1                | 2.471        | 2.120     | 0.370 | 0.387 |       |                       | 2.149     | 0.370 | 0.419 |       |        |
| Fe1-S2A               | 2.275        | 2.120     | 0.370 | 0.658 |       |                       | 2.149     | 0.370 | 0.711 |       |        |
| Fe1-S3A               | 2.253        | 2.120     | 0.370 | 0.698 |       |                       | 2.149     | 0.370 | 0.755 |       |        |
| Fe1-SG                | 2.465        | 2.120     | 0.370 | 0.394 | 2.137 | 0.137                 | 2.149     | 0.370 | 0.426 | 2.311 | -0.689 |
| Fe2-S1                | 2.452        | 2.120     | 0.370 | 0.408 |       |                       | 2.149     | 0.370 | 0.441 |       |        |
| Fe2-S2A               | 2.317        | 2.120     | 0.370 | 0.587 |       |                       | 2.149     | 0.370 | 0.635 |       |        |
| Fe2-S4A               | 2.284        | 2.120     | 0.370 | 0.642 |       |                       | 2.149     | 0.370 | 0.694 |       |        |
| Fe2-SG                | 2.487        | 2.120     | 0.370 | 0.371 | 2.008 | 0.008                 | 2.149     | 0.370 | 0.401 | 2.171 | -0.829 |
| Fe3-S2A               | 2.314        | 2.120     | 0.370 | 0.592 |       |                       | 2.149     | 0.370 | 0.640 |       |        |
| Fe3-S3A               | 2.289        | 2.120     | 0.370 | 0.633 |       |                       | 2.149     | 0.370 | 0.685 |       |        |
| Fe3-S4A               | 2.285        | 2.120     | 0.370 | 0.640 |       |                       | 2.149     | 0.370 | 0.692 |       |        |
| Fe3-SG                | 2.511        | 2.120     | 0.370 | 0.348 | 2.213 | 0.213                 | 2.149     | 0.370 | 0.376 | 2.394 | -0.606 |
| Fe4-S1                | 2.421        | 2.120     | 0.370 | 0.443 |       |                       | 2.149     | 0.370 | 0.479 |       |        |
| Fe4-S3A               | 2.262        | 2.120     | 0.370 | 0.681 |       |                       | 2.149     | 0.370 | 0.737 |       |        |
| Fe4-S4A               | 2.248        | 2.120     | 0.370 | 0.708 |       |                       | 2.149     | 0.370 | 0.765 |       |        |

|         |       |       |       |       |        |        |       |       |       |        |        |
|---------|-------|-------|-------|-------|--------|--------|-------|-------|-------|--------|--------|
| Fe4-SG  | 2.429 | 2.120 | 0.370 | 0.434 | 2.266  | 0.266  | 2.149 | 0.370 | 0.469 | 2.451  | -0.549 |
| Fe5-S1  | 2.398 | 2.120 | 0.370 | 0.472 |        |        | 2.149 | 0.370 | 0.510 |        |        |
| Fe5-S2B | 2.306 | 2.120 | 0.370 | 0.605 |        |        | 2.149 | 0.370 | 0.654 |        |        |
| Fe5-S4B | 2.247 | 2.120 | 0.370 | 0.709 |        |        | 2.149 | 0.370 | 0.767 |        |        |
| Fe5-SG  | 2.643 | 2.120 | 0.370 | 0.243 | 2.029  | 0.029  | 2.149 | 0.370 | 0.263 | 2.195  | -0.805 |
| Fe6-S1  | 2.488 | 2.120 | 0.370 | 0.370 |        |        | 2.149 | 0.370 | 0.400 |        |        |
| Fe6-S2B | 2.296 | 2.120 | 0.370 | 0.621 |        |        | 2.149 | 0.370 | 0.672 |        |        |
| Fe6-S3B | 2.347 | 2.120 | 0.370 | 0.541 |        |        | 2.149 | 0.370 | 0.586 |        |        |
| Fe6-SG  | 2.488 | 2.120 | 0.370 | 0.370 | 1.903  | -0.097 | 2.149 | 0.370 | 0.400 | 2.058  | -0.942 |
| Fe7-S2B | 2.362 | 2.120 | 0.370 | 0.520 |        |        | 2.149 | 0.370 | 0.562 |        |        |
| Fe7-S3B | 2.328 | 2.120 | 0.370 | 0.570 |        |        | 2.149 | 0.370 | 0.616 |        |        |
| Fe7-S4B | 2.365 | 2.120 | 0.370 | 0.516 |        |        | 2.149 | 0.370 | 0.558 |        |        |
| Fe7-SG  | 2.498 | 2.120 | 0.370 | 0.360 | 1.966  | -0.034 | 2.149 | 0.370 | 0.389 | 2.126  | -0.874 |
| Fe8-S1  | 2.413 | 2.120 | 0.370 | 0.453 |        |        | 2.149 | 0.370 | 0.490 |        |        |
| Fe8-S3B | 2.356 | 2.120 | 0.370 | 0.528 |        |        | 2.149 | 0.370 | 0.572 |        |        |
| Fe8-S4B | 2.252 | 2.120 | 0.370 | 0.700 |        |        | 2.149 | 0.370 | 0.757 |        |        |
| Fe8-SG  | 2.409 | 2.120 | 0.370 | 0.458 | 2.139  | 0.139  | 2.149 | 0.370 | 0.495 | 2.314  | -0.686 |
|         |       |       |       |       | 16.660 |        |       |       |       | 18.019 |        |

**Table S56** The adopted bond valence analyses for irons in P-cluster [2] from MoFe protein 4WZB which was reported as P<sup>N</sup> at 2.3 Å resolution.

| Bond                  | $r_{ij}$ (Å) | $R_0$ (Å) | B (Å) | Bval  | Sum   | Diff.                 | $R_0$ (Å) | B (Å) | Bval  | Sum   | Diff.  |
|-----------------------|--------------|-----------|-------|-------|-------|-----------------------|-----------|-------|-------|-------|--------|
| expected valence = +2 |              |           |       |       |       | expected valence = +3 |           |       |       |       |        |
| Fe1-S1                | 2.463        | 2.120     | 0.370 | 0.396 |       |                       | 2.149     | 0.370 | 0.428 |       |        |
| Fe1-S2A               | 2.262        | 2.120     | 0.370 | 0.681 |       |                       | 2.149     | 0.370 | 0.737 |       |        |
| Fe1-S3A               | 2.250        | 2.120     | 0.370 | 0.704 |       |                       | 2.149     | 0.370 | 0.761 |       |        |
| Fe1-SG                | 2.474        | 2.120     | 0.370 | 0.384 | 2.165 | 0.165                 | 2.149     | 0.370 | 0.415 | 2.341 | -0.659 |
| Fe2-S1                | 2.455        | 2.120     | 0.370 | 0.404 |       |                       | 2.149     | 0.370 | 0.437 |       |        |
| Fe2-S2A               | 2.342        | 2.120     | 0.370 | 0.549 |       |                       | 2.149     | 0.370 | 0.594 |       |        |
| Fe2-S4A               | 2.277        | 2.120     | 0.370 | 0.654 |       |                       | 2.149     | 0.370 | 0.708 |       |        |
| Fe2-SG                | 2.510        | 2.120     | 0.370 | 0.349 | 1.956 | -0.044                | 2.149     | 0.370 | 0.377 | 2.115 | -0.885 |
| Fe3-S2A               | 2.301        | 2.120     | 0.370 | 0.613 |       |                       | 2.149     | 0.370 | 0.663 |       |        |
| Fe3-S3A               | 2.325        | 2.120     | 0.370 | 0.575 |       |                       | 2.149     | 0.370 | 0.621 |       |        |
| Fe3-S4A               | 2.275        | 2.120     | 0.370 | 0.658 |       |                       | 2.149     | 0.370 | 0.711 |       |        |
| Fe3-SG                | 2.430        | 2.120     | 0.370 | 0.433 | 2.278 | 0.278                 | 2.149     | 0.370 | 0.468 | 2.464 | -0.536 |
| Fe4-S1                | 2.416        | 2.120     | 0.370 | 0.449 |       |                       | 2.149     | 0.370 | 0.486 |       |        |
| Fe4-S3A               | 2.305        | 2.120     | 0.370 | 0.607 |       |                       | 2.149     | 0.370 | 0.656 |       |        |
| Fe4-S4A               | 2.247        | 2.120     | 0.370 | 0.709 |       |                       | 2.149     | 0.370 | 0.767 |       |        |



|         |       |       |       |       |        |        |       |       |       |        |        |
|---------|-------|-------|-------|-------|--------|--------|-------|-------|-------|--------|--------|
| Fe4-SG  | 2.431 | 2.120 | 0.370 | 0.431 | 2.197  | 0.197  | 2.149 | 0.370 | 0.467 | 2.376  | -0.624 |
| Fe5-S1  | 2.431 | 2.120 | 0.370 | 0.431 |        |        | 2.149 | 0.370 | 0.467 |        |        |
| Fe5-S2B | 2.318 | 2.120 | 0.370 | 0.586 |        |        | 2.149 | 0.370 | 0.633 |        |        |
| Fe5-S4B | 2.234 | 2.120 | 0.370 | 0.735 |        |        | 2.149 | 0.370 | 0.795 |        |        |
| Fe5-SG  | 2.408 | 2.120 | 0.370 | 0.459 | 2.211  | 0.211  | 2.149 | 0.370 | 0.497 | 2.391  | -0.609 |
| Fe6-S1  | 2.487 | 2.120 | 0.370 | 0.371 |        |        | 2.149 | 0.370 | 0.401 |        |        |
| Fe6-S2B | 2.288 | 2.120 | 0.370 | 0.635 |        |        | 2.149 | 0.370 | 0.687 |        |        |
| Fe6-S3B | 2.370 | 2.120 | 0.370 | 0.509 |        |        | 2.149 | 0.370 | 0.550 |        |        |
| Fe6-SG  | 2.531 | 2.120 | 0.370 | 0.329 | 1.844  | -0.156 | 2.149 | 0.370 | 0.356 | 1.994  | -1.006 |
| Fe7-S2B | 2.379 | 2.120 | 0.370 | 0.497 |        |        | 2.149 | 0.370 | 0.537 |        |        |
| Fe7-S3B | 2.303 | 2.120 | 0.370 | 0.610 |        |        | 2.149 | 0.370 | 0.660 |        |        |
| Fe7-S4B | 2.345 | 2.120 | 0.370 | 0.544 |        |        | 2.149 | 0.370 | 0.589 |        |        |
| Fe7-SG  | 2.430 | 2.120 | 0.370 | 0.433 | 2.083  | 0.083  | 2.149 | 0.370 | 0.468 | 2.253  | -0.747 |
| Fe8-S1  | 2.453 | 2.120 | 0.370 | 0.407 |        |        | 2.149 | 0.370 | 0.440 |        |        |
| Fe8-S3B | 2.332 | 2.120 | 0.370 | 0.564 |        |        | 2.149 | 0.370 | 0.610 |        |        |
| Fe8-S4B | 2.212 | 2.120 | 0.370 | 0.780 |        |        | 2.149 | 0.370 | 0.843 |        |        |
| Fe8-SG  | 2.537 | 2.120 | 0.370 | 0.324 | 2.074  | 0.074  | 2.149 | 0.370 | 0.350 | 2.243  | -0.757 |
|         |       |       |       |       | 16.809 |        |       |       |       | 18.179 |        |

**Table S57** The adopted bond valence analyses for irons in P-cluster [1] from MoFe protein 5BVG which was reported as P<sup>N</sup> at 1.6 Å resolution.

| Bond                  | $r_{ij}$ (Å) | $R_0$ (Å) | B (Å) | Bval  | Sum   | Diff.                 | $R_0$ (Å) | B (Å) | Bval  | Sum   | Diff.  |
|-----------------------|--------------|-----------|-------|-------|-------|-----------------------|-----------|-------|-------|-------|--------|
| expected valence = +2 |              |           |       |       |       | expected valence = +3 |           |       |       |       |        |
| Fe1-S1                | 2.441        | 2.120     | 0.370 | 0.420 |       |                       | 2.149     | 0.370 | 0.454 |       |        |
| Fe1-S2A               | 2.300        | 2.120     | 0.370 | 0.615 |       |                       | 2.149     | 0.370 | 0.665 |       |        |
| Fe1-S3A               | 2.278        | 2.120     | 0.370 | 0.652 |       |                       | 2.149     | 0.370 | 0.706 |       |        |
| Fe1-SG                | 2.373        | 2.120     | 0.370 | 0.505 | 2.192 | 0.192                 | 2.149     | 0.370 | 0.546 | 2.371 | -0.629 |
| Fe2-S1                | 2.415        | 2.120     | 0.370 | 0.451 |       |                       | 2.149     | 0.370 | 0.487 |       |        |
| Fe2-S2A               | 2.275        | 2.120     | 0.370 | 0.658 |       |                       | 2.149     | 0.370 | 0.711 |       |        |
| Fe2-S4A               | 2.283        | 2.120     | 0.370 | 0.644 |       |                       | 2.149     | 0.370 | 0.696 |       |        |
| Fe2-SG                | 2.311        | 2.120     | 0.370 | 0.597 | 2.349 | 0.349                 | 2.149     | 0.370 | 0.645 | 2.540 | -0.460 |
| Fe3-S2A               | 2.268        | 2.120     | 0.370 | 0.670 |       |                       | 2.149     | 0.370 | 0.725 |       |        |
| Fe3-S3A               | 2.244        | 2.120     | 0.370 | 0.715 |       |                       | 2.149     | 0.370 | 0.774 |       |        |
| Fe3-S4A               | 2.318        | 2.120     | 0.370 | 0.586 |       |                       | 2.149     | 0.370 | 0.633 |       |        |
| Fe3-SG                | 2.304        | 2.120     | 0.370 | 0.608 | 2.579 | 0.579                 | 2.149     | 0.370 | 0.658 | 2.790 | -0.210 |
| Fe4-S1                | 2.394        | 2.120     | 0.370 | 0.477 |       |                       | 2.149     | 0.370 | 0.516 |       |        |
| Fe4-S3A               | 2.254        | 2.120     | 0.370 | 0.696 |       |                       | 2.149     | 0.370 | 0.753 |       |        |
| Fe4-S4A               | 2.285        | 2.120     | 0.370 | 0.640 |       |                       | 2.149     | 0.370 | 0.692 |       |        |

|         |       |       |       |       |        |       |       |       |       |        |        |
|---------|-------|-------|-------|-------|--------|-------|-------|-------|-------|--------|--------|
| Fe4-SG  | 2.330 | 2.120 | 0.370 | 0.567 | 2.380  | 0.380 | 2.149 | 0.370 | 0.613 | 2.574  | -0.426 |
| Fe5-S1  | 2.474 | 2.120 | 0.370 | 0.384 |        |       | 2.149 | 0.370 | 0.415 |        |        |
| Fe5-S2B | 2.232 | 2.120 | 0.370 | 0.739 |        |       | 2.149 | 0.370 | 0.799 |        |        |
| Fe5-S4B | 2.295 | 2.120 | 0.370 | 0.623 |        |       | 2.149 | 0.370 | 0.674 |        |        |
| Fe5-SG  | 2.341 | 2.120 | 0.370 | 0.550 | 2.296  | 0.296 | 2.149 | 0.370 | 0.595 | 2.484  | -0.516 |
| Fe6-S1  | 2.532 | 2.120 | 0.370 | 0.328 |        |       | 2.149 | 0.370 | 0.355 |        |        |
| Fe6-S2B | 2.287 | 2.120 | 0.370 | 0.637 |        |       | 2.149 | 0.370 | 0.689 |        |        |
| Fe6-S3B | 2.322 | 2.120 | 0.370 | 0.579 |        |       | 2.149 | 0.370 | 0.627 |        |        |
| Fe6-SG  | 2.294 | 2.120 | 0.370 | 0.625 | 2.169  | 0.169 | 2.149 | 0.370 | 0.676 | 2.346  | -0.654 |
| Fe7-S2B | 2.254 | 2.120 | 0.370 | 0.696 |        |       | 2.149 | 0.370 | 0.753 |        |        |
| Fe7-S3B | 2.318 | 2.120 | 0.370 | 0.586 |        |       | 2.149 | 0.370 | 0.633 |        |        |
| Fe7-S4B | 2.324 | 2.120 | 0.370 | 0.576 |        |       | 2.149 | 0.370 | 0.623 |        |        |
| Fe7-SG  | 2.387 | 2.120 | 0.370 | 0.486 | 2.344  | 0.344 | 2.149 | 0.370 | 0.526 | 2.535  | -0.465 |
| Fe8-S1  | 2.400 | 2.120 | 0.370 | 0.469 |        |       | 2.149 | 0.370 | 0.507 |        |        |
| Fe8-S3B | 2.300 | 2.120 | 0.370 | 0.615 |        |       | 2.149 | 0.370 | 0.665 |        |        |
| Fe8-S4B | 2.287 | 2.120 | 0.370 | 0.637 |        |       | 2.149 | 0.370 | 0.689 |        |        |
| Fe8-SG  | 2.299 | 2.120 | 0.370 | 0.616 | 2.337  | 0.337 | 2.149 | 0.370 | 0.667 | 2.528  | -0.472 |
|         |       |       |       |       | 16.310 |       |       |       |       | 20.167 |        |

**Table S58** The adopted bond valence analyses for irons in P-cluster [2] from MoFe protein 5BVG which was reported as P<sup>N</sup> at 1.6 Å resolution.

| Bond                  | $r_{ij}$ (Å) | $R_0$ (Å) | B (Å) | Bval  | Sum   | Diff.                 | $R_0$ (Å) | B (Å) | Bval  | Sum   | Diff.  |
|-----------------------|--------------|-----------|-------|-------|-------|-----------------------|-----------|-------|-------|-------|--------|
| expected valence = +2 |              |           |       |       |       | expected valence = +3 |           |       |       |       |        |
| Fe1-S1                | 2.460        | 2.120     | 0.370 | 0.399 |       |                       | 2.149     | 0.370 | 0.431 |       |        |
| Fe1-S2A               | 2.302        | 2.120     | 0.370 | 0.611 |       |                       | 2.149     | 0.370 | 0.661 |       |        |
| Fe1-S3A               | 2.295        | 2.120     | 0.370 | 0.623 |       |                       | 2.149     | 0.370 | 0.674 |       |        |
| Fe1-SG                | 2.359        | 2.120     | 0.370 | 0.524 | 2.158 | 0.158                 | 2.149     | 0.370 | 0.567 | 2.334 | -0.666 |
| Fe2-S1                | 2.420        | 2.120     | 0.370 | 0.444 |       |                       | 2.149     | 0.370 | 0.481 |       |        |
| Fe2-S2A               | 2.291        | 2.120     | 0.370 | 0.630 |       |                       | 2.149     | 0.370 | 0.681 |       |        |
| Fe2-S4A               | 2.281        | 2.120     | 0.370 | 0.647 |       |                       | 2.149     | 0.370 | 0.700 |       |        |
| Fe2-SG                | 2.345        | 2.120     | 0.370 | 0.544 | 2.266 | 0.266                 | 2.149     | 0.370 | 0.589 | 2.451 | -0.549 |
| Fe3-S2A               | 2.273        | 2.120     | 0.370 | 0.661 |       |                       | 2.149     | 0.370 | 0.715 |       |        |
| Fe3-S3A               | 2.248        | 2.120     | 0.370 | 0.708 |       |                       | 2.149     | 0.370 | 0.765 |       |        |
| Fe3-S4A               | 2.322        | 2.120     | 0.370 | 0.579 |       |                       | 2.149     | 0.370 | 0.627 |       |        |
| Fe3-SG                | 2.299        | 2.120     | 0.370 | 0.616 | 2.565 | 0.565                 | 2.149     | 0.370 | 0.667 | 2.774 | -0.226 |
| Fe4-S1                | 2.377        | 2.120     | 0.370 | 0.499 |       |                       | 2.149     | 0.370 | 0.540 |       |        |
| Fe4-S3A               | 2.275        | 2.120     | 0.370 | 0.658 |       |                       | 2.149     | 0.370 | 0.711 |       |        |
| Fe4-S4A               | 2.280        | 2.120     | 0.370 | 0.649 |       |                       | 2.149     | 0.370 | 0.702 |       |        |

|         |       |       |       |       |        |       |       |       |       |        |        |
|---------|-------|-------|-------|-------|--------|-------|-------|-------|-------|--------|--------|
| Fe4-SG  | 2.330 | 2.120 | 0.370 | 0.567 | 2.373  | 0.373 | 2.149 | 0.370 | 0.613 | 2.566  | -0.434 |
| Fe5-S1  | 2.455 | 2.120 | 0.370 | 0.404 |        |       | 2.149 | 0.370 | 0.437 |        |        |
| Fe5-S2B | 2.239 | 2.120 | 0.370 | 0.725 |        |       | 2.149 | 0.370 | 0.784 |        |        |
| Fe5-S4B | 2.308 | 2.120 | 0.370 | 0.602 |        |       | 2.149 | 0.370 | 0.651 |        |        |
| Fe5-SG  | 2.332 | 2.120 | 0.370 | 0.564 | 2.295  | 0.295 | 2.149 | 0.370 | 0.610 | 2.482  | -0.518 |
| Fe6-S1  | 2.525 | 2.120 | 0.370 | 0.335 |        |       | 2.149 | 0.370 | 0.362 |        |        |
| Fe6-S2B | 2.303 | 2.120 | 0.370 | 0.610 |        |       | 2.149 | 0.370 | 0.660 |        |        |
| Fe6-S3B | 2.309 | 2.120 | 0.370 | 0.600 |        |       | 2.149 | 0.370 | 0.649 |        |        |
| Fe6-SG  | 2.341 | 2.120 | 0.370 | 0.550 | 2.095  | 0.095 | 2.149 | 0.370 | 0.595 | 2.266  | -0.734 |
| Fe7-S2B | 2.278 | 2.120 | 0.370 | 0.652 |        |       | 2.149 | 0.370 | 0.706 |        |        |
| Fe7-S3B | 2.330 | 2.120 | 0.370 | 0.567 |        |       | 2.149 | 0.370 | 0.613 |        |        |
| Fe7-S4B | 2.328 | 2.120 | 0.370 | 0.570 |        |       | 2.149 | 0.370 | 0.616 |        |        |
| Fe7-SG  | 2.358 | 2.120 | 0.370 | 0.526 | 2.315  | 0.315 | 2.149 | 0.370 | 0.568 | 2.504  | -0.496 |
| Fe8-S1  | 2.412 | 2.120 | 0.370 | 0.454 |        |       | 2.149 | 0.370 | 0.491 |        |        |
| Fe8-S3B | 2.314 | 2.120 | 0.370 | 0.592 |        |       | 2.149 | 0.370 | 0.640 |        |        |
| Fe8-S4B | 2.312 | 2.120 | 0.370 | 0.595 |        |       | 2.149 | 0.370 | 0.644 |        |        |
| Fe8-SG  | 2.296 | 2.120 | 0.370 | 0.621 | 2.263  | 0.263 | 2.149 | 0.370 | 0.672 | 2.447  | -0.553 |
|         |       |       |       |       | 16.066 |       |       |       |       | 19.823 |        |

**Table S59** The adopted bond valence analyses for irons in P-cluster [1] from MoFe protein 5BVH which was reported as P<sup>N</sup> at 1.53 Å resolution.

| Bond                  | $r_{ij}$ (Å) | $R_0$ (Å) | B (Å) | Bval  | Sum   | Diff.                 | $R_0$ (Å) | B (Å) | Bval  | Sum   | Diff.  |
|-----------------------|--------------|-----------|-------|-------|-------|-----------------------|-----------|-------|-------|-------|--------|
| expected valence = +2 |              |           |       |       |       | expected valence = +3 |           |       |       |       |        |
| Fe1-S1                | 2.454        | 2.120     | 0.370 | 0.405 |       |                       | 2.149     | 0.370 | 0.439 |       |        |
| Fe1-S2A               | 2.291        | 2.120     | 0.370 | 0.630 |       |                       | 2.149     | 0.370 | 0.681 |       |        |
| Fe1-S3A               | 2.277        | 2.120     | 0.370 | 0.654 |       |                       | 2.149     | 0.370 | 0.708 |       |        |
| Fe1-SG                | 2.347        | 2.120     | 0.370 | 0.541 | 2.231 | 0.231                 | 2.149     | 0.370 | 0.586 | 2.413 | -0.587 |
| Fe2-S1                | 2.438        | 2.120     | 0.370 | 0.423 |       |                       | 2.149     | 0.370 | 0.458 |       |        |
| Fe2-S2A               | 2.275        | 2.120     | 0.370 | 0.658 |       |                       | 2.149     | 0.370 | 0.711 |       |        |
| Fe2-S4A               | 2.286        | 2.120     | 0.370 | 0.638 |       |                       | 2.149     | 0.370 | 0.691 |       |        |
| Fe2-SG                | 2.327        | 2.120     | 0.370 | 0.572 | 2.291 | 0.291                 | 2.149     | 0.370 | 0.618 | 2.478 | -0.522 |
| Fe3-S2A               | 2.270        | 2.120     | 0.370 | 0.667 |       |                       | 2.149     | 0.370 | 0.721 |       |        |
| Fe3-S3A               | 2.259        | 2.120     | 0.370 | 0.687 |       |                       | 2.149     | 0.370 | 0.743 |       |        |
| Fe3-S4A               | 2.330        | 2.120     | 0.370 | 0.567 |       |                       | 2.149     | 0.370 | 0.613 |       |        |
| Fe3-SG                | 2.294        | 2.120     | 0.370 | 0.625 | 2.545 | 0.545                 | 2.149     | 0.370 | 0.676 | 2.753 | -0.247 |
| Fe4-S1                | 2.416        | 2.120     | 0.370 | 0.449 |       |                       | 2.149     | 0.370 | 0.486 |       |        |
| Fe4-S3A               | 2.253        | 2.120     | 0.370 | 0.698 |       |                       | 2.149     | 0.370 | 0.755 |       |        |
| Fe4-S4A               | 2.283        | 2.120     | 0.370 | 0.644 |       |                       | 2.149     | 0.370 | 0.696 |       |        |

|         |       |       |       |       |        |       |       |       |       |        |        |
|---------|-------|-------|-------|-------|--------|-------|-------|-------|-------|--------|--------|
| Fe4-SG  | 2.326 | 2.120 | 0.370 | 0.573 | 2.364  | 0.364 | 2.149 | 0.370 | 0.620 | 2.557  | -0.443 |
| Fe5-S1  | 2.457 | 2.120 | 0.370 | 0.402 |        |       | 2.149 | 0.370 | 0.435 |        |        |
| Fe5-S2B | 2.265 | 2.120 | 0.370 | 0.676 |        |       | 2.149 | 0.370 | 0.731 |        |        |
| Fe5-S4B | 2.307 | 2.120 | 0.370 | 0.603 |        |       | 2.149 | 0.370 | 0.652 |        |        |
| Fe5-SG  | 2.349 | 2.120 | 0.370 | 0.539 | 2.220  | 0.220 | 2.149 | 0.370 | 0.582 | 2.401  | -0.599 |
| Fe6-S1  | 2.453 | 2.120 | 0.370 | 0.407 |        |       | 2.149 | 0.370 | 0.440 |        |        |
| Fe6-S2B | 2.315 | 2.120 | 0.370 | 0.590 |        |       | 2.149 | 0.370 | 0.638 |        |        |
| Fe6-S3B | 2.321 | 2.120 | 0.370 | 0.581 |        |       | 2.149 | 0.370 | 0.628 |        |        |
| Fe6-SG  | 2.333 | 2.120 | 0.370 | 0.562 | 2.140  | 0.140 | 2.149 | 0.370 | 0.608 | 2.315  | -0.685 |
| Fe7-S2B | 2.323 | 2.120 | 0.370 | 0.578 |        |       | 2.149 | 0.370 | 0.625 |        |        |
| Fe7-S3B | 2.311 | 2.120 | 0.370 | 0.597 |        |       | 2.149 | 0.370 | 0.645 |        |        |
| Fe7-S4B | 2.330 | 2.120 | 0.370 | 0.567 |        |       | 2.149 | 0.370 | 0.613 |        |        |
| Fe7-SG  | 2.349 | 2.120 | 0.370 | 0.539 | 2.280  | 0.280 | 2.149 | 0.370 | 0.582 | 2.466  | -0.534 |
| Fe8-S1  | 2.406 | 2.120 | 0.370 | 0.462 |        |       | 2.149 | 0.370 | 0.499 |        |        |
| Fe8-S3B | 2.314 | 2.120 | 0.370 | 0.592 |        |       | 2.149 | 0.370 | 0.640 |        |        |
| Fe8-S4B | 2.278 | 2.120 | 0.370 | 0.652 |        |       | 2.149 | 0.370 | 0.706 |        |        |
| Fe8-SG  | 2.320 | 2.120 | 0.370 | 0.582 | 2.288  | 0.288 | 2.149 | 0.370 | 0.630 | 2.475  | -0.525 |
|         |       |       |       |       | 18.360 |       |       |       |       | 19.857 |        |

**Table S60** The adopted bond valence analyses for irons in P-cluster [2] from MoFe protein 5BVH which was reported as P<sup>N</sup> at 1.53 Å resolution.

| Bond                  | $r_{ij}$ (Å) | $R_0$ (Å) | B (Å) | Bval  | Sum   | Diff.                 | $R_0$ (Å) | B (Å) | Bval  | Sum   | Diff.  |
|-----------------------|--------------|-----------|-------|-------|-------|-----------------------|-----------|-------|-------|-------|--------|
| expected valence = +2 |              |           |       |       |       | expected valence = +3 |           |       |       |       |        |
| Fe1-S1                | 2.451        | 2.120     | 0.370 | 0.409 |       |                       | 2.149     | 0.370 | 0.442 |       |        |
| Fe1-S2A               | 2.302        | 2.120     | 0.370 | 0.611 |       |                       | 2.149     | 0.370 | 0.661 |       |        |
| Fe1-S3A               | 2.277        | 2.120     | 0.370 | 0.654 |       |                       | 2.149     | 0.370 | 0.708 |       |        |
| Fe1-SG                | 2.327        | 2.120     | 0.370 | 0.572 | 2.246 | 0.246                 | 2.149     | 0.370 | 0.618 | 2.429 | -0.571 |
| Fe2-S1                | 2.420        | 2.120     | 0.370 | 0.444 |       |                       | 2.149     | 0.370 | 0.481 |       |        |
| Fe2-S2A               | 2.290        | 2.120     | 0.370 | 0.632 |       |                       | 2.149     | 0.370 | 0.683 |       |        |
| Fe2-S4A               | 2.286        | 2.120     | 0.370 | 0.638 |       |                       | 2.149     | 0.370 | 0.691 |       |        |
| Fe2-SG                | 2.304        | 2.120     | 0.370 | 0.608 | 2.323 | 0.323                 | 2.149     | 0.370 | 0.658 | 2.512 | -0.488 |
| Fe3-S2A               | 2.271        | 2.120     | 0.370 | 0.665 |       |                       | 2.149     | 0.370 | 0.719 |       |        |
| Fe3-S3A               | 2.256        | 2.120     | 0.370 | 0.692 |       |                       | 2.149     | 0.370 | 0.749 |       |        |
| Fe3-S4A               | 2.323        | 2.120     | 0.370 | 0.578 |       |                       | 2.149     | 0.370 | 0.625 |       |        |
| Fe3-SG                | 2.307        | 2.120     | 0.370 | 0.603 | 2.538 | 0.538                 | 2.149     | 0.370 | 0.652 | 2.745 | -0.255 |
| Fe4-S1                | 2.392        | 2.120     | 0.370 | 0.479 |       |                       | 2.149     | 0.370 | 0.519 |       |        |
| Fe4-S3A               | 2.265        | 2.120     | 0.370 | 0.676 |       |                       | 2.149     | 0.370 | 0.731 |       |        |
| Fe4-S4A               | 2.291        | 2.120     | 0.370 | 0.630 |       |                       | 2.149     | 0.370 | 0.681 |       |        |



|         |       |       |       |       |        |       |       |       |       |        |        |
|---------|-------|-------|-------|-------|--------|-------|-------|-------|-------|--------|--------|
| Fe4-SG  | 2.319 | 2.120 | 0.370 | 0.584 | 2.369  | 0.369 | 2.149 | 0.370 | 0.632 | 2.562  | -0.438 |
| Fe5-S1  | 2.448 | 2.120 | 0.370 | 0.412 |        |       | 2.149 | 0.370 | 0.446 |        |        |
| Fe5-S2B | 2.247 | 2.120 | 0.370 | 0.709 |        |       | 2.149 | 0.370 | 0.767 |        |        |
| Fe5-S4B | 2.311 | 2.120 | 0.370 | 0.597 |        |       | 2.149 | 0.370 | 0.645 |        |        |
| Fe5-SG  | 2.369 | 2.120 | 0.370 | 0.510 | 2.229  | 0.229 | 2.149 | 0.370 | 0.552 | 2.410  | -0.590 |
| Fe6-S1  | 2.492 | 2.120 | 0.370 | 0.366 |        |       | 2.149 | 0.370 | 0.396 |        |        |
| Fe6-S2B | 2.304 | 2.120 | 0.370 | 0.608 |        |       | 2.149 | 0.370 | 0.658 |        |        |
| Fe6-S3B | 2.306 | 2.120 | 0.370 | 0.605 |        |       | 2.149 | 0.370 | 0.654 |        |        |
| Fe6-SG  | 2.324 | 2.120 | 0.370 | 0.576 | 2.155  | 0.155 | 2.149 | 0.370 | 0.623 | 2.331  | -0.669 |
| Fe7-S2B | 2.312 | 2.120 | 0.370 | 0.595 |        |       | 2.149 | 0.370 | 0.644 |        |        |
| Fe7-S3B | 2.310 | 2.120 | 0.370 | 0.598 |        |       | 2.149 | 0.370 | 0.647 |        |        |
| Fe7-S4B | 2.337 | 2.120 | 0.370 | 0.556 |        |       | 2.149 | 0.370 | 0.602 |        |        |
| Fe7-SG  | 2.358 | 2.120 | 0.370 | 0.526 | 2.275  | 0.275 | 2.149 | 0.370 | 0.568 | 2.461  | -0.539 |
| Fe8-S1  | 2.419 | 2.120 | 0.370 | 0.446 |        |       | 2.149 | 0.370 | 0.482 |        |        |
| Fe8-S3B | 2.292 | 2.120 | 0.370 | 0.628 |        |       | 2.149 | 0.370 | 0.679 |        |        |
| Fe8-S4B | 2.302 | 2.120 | 0.370 | 0.611 |        |       | 2.149 | 0.370 | 0.661 |        |        |
| Fe8-SG  | 2.296 | 2.120 | 0.370 | 0.621 | 2.307  | 0.307 | 2.149 | 0.370 | 0.672 | 2.495  | -0.505 |
|         |       |       |       |       | 18.442 |       |       |       |       | 19.946 |        |

**Table S61** The adopted bond valence analyses for irons in P-cluster [1] from MoFe protein 5CX1 whose conformation resemble as P<sup>N</sup> at 1.75 Å resolution.

| Bond                  | $r_{ij}$ (Å) | $R_0$ (Å) | B (Å) | Bval  | Sum   | Diff.                 | $R_0$ (Å) | B (Å) | Bval  | Sum   | Diff.  |
|-----------------------|--------------|-----------|-------|-------|-------|-----------------------|-----------|-------|-------|-------|--------|
| expected valence = +2 |              |           |       |       |       | expected valence = +3 |           |       |       |       |        |
| Fe1-S1                | 2.421        | 2.120     | 0.370 | 0.443 |       |                       | 2.149     | 0.370 | 0.479 |       |        |
| Fe1-S2A               | 2.249        | 2.120     | 0.370 | 0.706 |       |                       | 2.149     | 0.370 | 0.763 |       |        |
| Fe1-S3A               | 2.286        | 2.120     | 0.370 | 0.638 |       |                       | 2.149     | 0.370 | 0.691 |       |        |
| Fe1-SG                | 2.334        | 2.120     | 0.370 | 0.561 | 2.348 | 0.348                 | 2.149     | 0.370 | 0.607 | 2.540 | -0.460 |
| Fe2-S1                | 2.427        | 2.120     | 0.370 | 0.436 |       |                       | 2.149     | 0.370 | 0.472 |       |        |
| Fe2-S2A               | 2.301        | 2.120     | 0.370 | 0.613 |       |                       | 2.149     | 0.370 | 0.663 |       |        |
| Fe2-S4A               | 2.259        | 2.120     | 0.370 | 0.687 |       |                       | 2.149     | 0.370 | 0.743 |       |        |
| Fe2-SG                | 2.311        | 2.120     | 0.370 | 0.597 | 2.333 | 0.333                 | 2.149     | 0.370 | 0.645 | 2.523 | -0.477 |
| Fe3-S2A               | 2.283        | 2.120     | 0.370 | 0.644 |       |                       | 2.149     | 0.370 | 0.696 |       |        |
| Fe3-S3A               | 2.265        | 2.120     | 0.370 | 0.676 |       |                       | 2.149     | 0.370 | 0.731 |       |        |
| Fe3-S4A               | 2.313        | 2.120     | 0.370 | 0.594 |       |                       | 2.149     | 0.370 | 0.642 |       |        |
| Fe3-SG                | 2.301        | 2.120     | 0.370 | 0.613 | 2.526 | 0.526                 | 2.149     | 0.370 | 0.663 | 2.732 | -0.268 |
| Fe4-S1                | 2.364        | 2.120     | 0.370 | 0.517 |       |                       | 2.149     | 0.370 | 0.559 |       |        |
| Fe4-S3A               | 2.292        | 2.120     | 0.370 | 0.628 |       |                       | 2.149     | 0.370 | 0.679 |       |        |
| Fe4-S4A               | 2.289        | 2.120     | 0.370 | 0.633 |       |                       | 2.149     | 0.370 | 0.685 |       |        |

|         |       |       |       |       |        |       |       |       |       |        |        |
|---------|-------|-------|-------|-------|--------|-------|-------|-------|-------|--------|--------|
| Fe4-SG  | 2.421 | 2.120 | 0.370 | 0.443 | 2.222  | 0.222 | 2.149 | 0.370 | 0.479 | 2.403  | -0.597 |
| Fe5-S1  | 2.478 | 2.120 | 0.370 | 0.380 |        |       | 2.149 | 0.370 | 0.411 |        |        |
| Fe5-S2B | 2.259 | 2.120 | 0.370 | 0.687 |        |       | 2.149 | 0.370 | 0.743 |        |        |
| Fe5-S4B | 2.297 | 2.120 | 0.370 | 0.620 |        |       | 2.149 | 0.370 | 0.670 |        |        |
| Fe5-SG  | 2.305 | 2.120 | 0.370 | 0.607 | 2.293  | 0.293 | 2.149 | 0.370 | 0.656 | 2.480  | -0.520 |
| Fe6-S1  | 2.619 | 2.120 | 0.370 | 0.260 |        |       | 2.149 | 0.370 | 0.281 |        |        |
| Fe6-S2B | 2.268 | 2.120 | 0.370 | 0.670 |        |       | 2.149 | 0.370 | 0.725 |        |        |
| Fe6-S3B | 2.316 | 2.120 | 0.370 | 0.589 |        |       | 2.149 | 0.370 | 0.637 |        |        |
| Fe6-SG  | 2.328 | 2.120 | 0.370 | 0.570 | 2.089  | 0.089 | 2.149 | 0.370 | 0.616 | 2.259  | -0.741 |
| Fe7-S2B | 2.286 | 2.120 | 0.370 | 0.638 |        |       | 2.149 | 0.370 | 0.691 |        |        |
| Fe7-S3B | 2.316 | 2.120 | 0.370 | 0.589 |        |       | 2.149 | 0.370 | 0.637 |        |        |
| Fe7-S4B | 2.316 | 2.120 | 0.370 | 0.589 |        |       | 2.149 | 0.370 | 0.637 |        |        |
| Fe7-SG  | 2.367 | 2.120 | 0.370 | 0.513 | 2.329  | 0.329 | 2.149 | 0.370 | 0.555 | 2.519  | -0.481 |
| Fe8-S1  | 2.423 | 2.120 | 0.370 | 0.441 |        |       | 2.149 | 0.370 | 0.477 |        |        |
| Fe8-S3B | 2.270 | 2.120 | 0.370 | 0.667 |        |       | 2.149 | 0.370 | 0.721 |        |        |
| Fe8-S4B | 2.318 | 2.120 | 0.370 | 0.586 |        |       | 2.149 | 0.370 | 0.633 |        |        |
| Fe8-SG  | 2.307 | 2.120 | 0.370 | 0.603 | 2.296  | 0.296 | 2.149 | 0.370 | 0.652 | 2.484  | -0.516 |
|         |       |       |       |       | 18.436 |       |       |       |       | 19.940 |        |

**Table S62** The adopted bond valence analyses for irons in P-cluster [2] from MoFe protein 5CX1 whose conformation resemble as P<sup>N</sup> at 1.75 Å resolution.

| Bond                  | $r_{ij}$ (Å) | $R_0$ (Å) | B (Å) | Bval  | Sum   | Diff.                 | $R_0$ (Å) | B (Å) | Bval  | Sum   | Diff.  |
|-----------------------|--------------|-----------|-------|-------|-------|-----------------------|-----------|-------|-------|-------|--------|
| expected valence = +2 |              |           |       |       |       | expected valence = +3 |           |       |       |       |        |
| Fe1-S1                | 2.441        | 2.120     | 0.370 | 0.420 |       |                       | 2.149     | 0.370 | 0.454 |       |        |
| Fe1-S2A               | 2.263        | 2.120     | 0.370 | 0.679 |       |                       | 2.149     | 0.370 | 0.735 |       |        |
| Fe1-S3A               | 2.265        | 2.120     | 0.370 | 0.676 |       |                       | 2.149     | 0.370 | 0.731 |       |        |
| Fe1-SG                | 2.298        | 2.120     | 0.370 | 0.618 | 2.393 | 0.393                 | 2.149     | 0.370 | 0.669 | 2.588 | -0.412 |
| Fe2-S1                | 2.409        | 2.120     | 0.370 | 0.458 |       |                       | 2.149     | 0.370 | 0.495 |       |        |
| Fe2-S2A               | 2.291        | 2.120     | 0.370 | 0.630 |       |                       | 2.149     | 0.370 | 0.681 |       |        |
| Fe2-S4A               | 2.291        | 2.120     | 0.370 | 0.630 |       |                       | 2.149     | 0.370 | 0.681 |       |        |
| Fe2-SG                | 2.310        | 2.120     | 0.370 | 0.598 | 2.316 | 0.316                 | 2.149     | 0.370 | 0.647 | 2.505 | -0.495 |
| Fe3-S2A               | 2.296        | 2.120     | 0.370 | 0.621 |       |                       | 2.149     | 0.370 | 0.672 |       |        |
| Fe3-S3A               | 2.288        | 2.120     | 0.370 | 0.635 |       |                       | 2.149     | 0.370 | 0.687 |       |        |
| Fe3-S4A               | 2.310        | 2.120     | 0.370 | 0.598 |       |                       | 2.149     | 0.370 | 0.647 |       |        |
| Fe3-SG                | 2.301        | 2.120     | 0.370 | 0.613 | 2.468 | 0.468                 | 2.149     | 0.370 | 0.663 | 2.669 | -0.331 |
| Fe4-S1                | 2.369        | 2.120     | 0.370 | 0.510 |       |                       | 2.149     | 0.370 | 0.552 |       |        |
| Fe4-S3A               | 2.295        | 2.120     | 0.370 | 0.623 |       |                       | 2.149     | 0.370 | 0.674 |       |        |
| Fe4-S4A               | 2.256        | 2.120     | 0.370 | 0.692 |       |                       | 2.149     | 0.370 | 0.749 |       |        |

|         |       |       |       |       |        |       |       |       |       |        |        |
|---------|-------|-------|-------|-------|--------|-------|-------|-------|-------|--------|--------|
| Fe4-SG  | 2.402 | 2.120 | 0.370 | 0.467 | 2.292  | 0.292 | 2.149 | 0.370 | 0.505 | 2.479  | -0.521 |
| Fe5-S1  | 2.560 | 2.120 | 0.370 | 0.304 |        |       | 2.149 | 0.370 | 0.329 |        |        |
| Fe5-S2B | 2.263 | 2.120 | 0.370 | 0.679 |        |       | 2.149 | 0.370 | 0.735 |        |        |
| Fe5-S4B | 2.313 | 2.120 | 0.370 | 0.594 |        |       | 2.149 | 0.370 | 0.642 |        |        |
| Fe5-SG  | 2.290 | 2.120 | 0.370 | 0.632 | 2.209  | 0.209 | 2.149 | 0.370 | 0.683 | 2.389  | -0.611 |
| Fe6-S1  | 2.626 | 2.120 | 0.370 | 0.255 |        |       | 2.149 | 0.370 | 0.275 |        |        |
| Fe6-S2B | 2.255 | 2.120 | 0.370 | 0.694 |        |       | 2.149 | 0.370 | 0.751 |        |        |
| Fe6-S3B | 2.330 | 2.120 | 0.370 | 0.567 |        |       | 2.149 | 0.370 | 0.613 |        |        |
| Fe6-SG  | 2.277 | 2.120 | 0.370 | 0.654 | 2.170  | 0.170 | 2.149 | 0.370 | 0.708 | 2.347  | -0.653 |
| Fe7-S2B | 2.280 | 2.120 | 0.370 | 0.649 |        |       | 2.149 | 0.370 | 0.702 |        |        |
| Fe7-S3B | 2.330 | 2.120 | 0.370 | 0.567 |        |       | 2.149 | 0.370 | 0.613 |        |        |
| Fe7-S4B | 2.281 | 2.120 | 0.370 | 0.647 |        |       | 2.149 | 0.370 | 0.700 |        |        |
| Fe7-SG  | 2.371 | 2.120 | 0.370 | 0.507 | 2.370  | 0.370 | 2.149 | 0.370 | 0.549 | 2.564  | -0.436 |
| Fe8-S1  | 2.407 | 2.120 | 0.370 | 0.460 |        |       | 2.149 | 0.370 | 0.498 |        |        |
| Fe8-S3B | 2.275 | 2.120 | 0.370 | 0.658 |        |       | 2.149 | 0.370 | 0.711 |        |        |
| Fe8-S4B | 2.331 | 2.120 | 0.370 | 0.565 |        |       | 2.149 | 0.370 | 0.611 |        |        |
| Fe8-SG  | 2.290 | 2.120 | 0.370 | 0.632 | 2.315  | 0.315 | 2.149 | 0.370 | 0.683 | 2.504  | -0.496 |
|         |       |       |       |       | 18.535 |       |       |       |       | 20.046 |        |

**Table S63** The adopted bond valence analyses for irons in P-cluster [3] from MoFe protein 5CX1 whose conformation resemble as P<sup>N</sup> at 1.75 Å resolution.

| Bond                  | $r_{ij}$ (Å) | $R_0$ (Å) | B (Å) | Bval  | Sum   | Diff.                 | $R_0$ (Å) | B (Å) | Bval  | Sum   | Diff.  |
|-----------------------|--------------|-----------|-------|-------|-------|-----------------------|-----------|-------|-------|-------|--------|
| expected valence = +2 |              |           |       |       |       | expected valence = +3 |           |       |       |       |        |
| Fe1-S1                | 2.424        | 2.120     | 0.370 | 0.440 |       |                       | 2.149     | 0.370 | 0.476 |       |        |
| Fe1-S2A               | 2.274        | 2.120     | 0.370 | 0.660 |       |                       | 2.149     | 0.370 | 0.713 |       |        |
| Fe1-S3A               | 2.273        | 2.120     | 0.370 | 0.661 |       |                       | 2.149     | 0.370 | 0.715 |       |        |
| Fe1-SG                | 2.385        | 2.120     | 0.370 | 0.489 | 2.249 | 0.249                 | 2.149     | 0.370 | 0.528 | 2.433 | -0.567 |
| Fe2-S1                | 2.414        | 2.120     | 0.370 | 0.452 |       |                       | 2.149     | 0.370 | 0.489 |       |        |
| Fe2-S2A               | 2.269        | 2.120     | 0.370 | 0.669 |       |                       | 2.149     | 0.370 | 0.723 |       |        |
| Fe2-S4A               | 2.289        | 2.120     | 0.370 | 0.633 |       |                       | 2.149     | 0.370 | 0.685 |       |        |
| Fe2-SG                | 2.324        | 2.120     | 0.370 | 0.576 | 2.330 | 0.330                 | 2.149     | 0.370 | 0.623 | 2.520 | -0.480 |
| Fe3-S2A               | 2.294        | 2.120     | 0.370 | 0.625 |       |                       | 2.149     | 0.370 | 0.676 |       |        |
| Fe3-S3A               | 2.270        | 2.120     | 0.370 | 0.667 |       |                       | 2.149     | 0.370 | 0.721 |       |        |
| Fe3-S4A               | 2.304        | 2.120     | 0.370 | 0.608 |       |                       | 2.149     | 0.370 | 0.658 |       |        |
| Fe3-SG                | 2.341        | 2.120     | 0.370 | 0.550 | 2.450 | 0.450                 | 2.149     | 0.370 | 0.595 | 2.650 | -0.350 |
| Fe4-S1                | 2.386        | 2.120     | 0.370 | 0.487 |       |                       | 2.149     | 0.370 | 0.527 |       |        |
| Fe4-S3A               | 2.274        | 2.120     | 0.370 | 0.660 |       |                       | 2.149     | 0.370 | 0.713 |       |        |
| Fe4-S4A               | 2.288        | 2.120     | 0.370 | 0.635 |       |                       | 2.149     | 0.370 | 0.687 |       |        |

|         |       |       |       |       |        |       |       |       |       |        |        |
|---------|-------|-------|-------|-------|--------|-------|-------|-------|-------|--------|--------|
| Fe4-SG  | 2.437 | 2.120 | 0.370 | 0.425 | 2.206  | 0.206 | 2.149 | 0.370 | 0.459 | 2.386  | -0.614 |
| Fe5-S1  | 2.498 | 2.120 | 0.370 | 0.360 |        |       | 2.149 | 0.370 | 0.389 |        |        |
| Fe5-S2B | 2.225 | 2.120 | 0.370 | 0.753 |        |       | 2.149 | 0.370 | 0.814 |        |        |
| Fe5-S4B | 2.318 | 2.120 | 0.370 | 0.586 |        |       | 2.149 | 0.370 | 0.633 |        |        |
| Fe5-SG  | 2.327 | 2.120 | 0.370 | 0.572 | 2.270  | 0.270 | 2.149 | 0.370 | 0.618 | 2.455  | -0.545 |
| Fe6-S1  | 2.613 | 2.120 | 0.370 | 0.264 |        |       | 2.149 | 0.370 | 0.285 |        |        |
| Fe6-S2B | 2.250 | 2.120 | 0.370 | 0.704 |        |       | 2.149 | 0.370 | 0.761 |        |        |
| Fe6-S3B | 2.321 | 2.120 | 0.370 | 0.581 |        |       | 2.149 | 0.370 | 0.628 |        |        |
| Fe6-SG  | 2.297 | 2.120 | 0.370 | 0.620 | 2.168  | 0.168 | 2.149 | 0.370 | 0.670 | 2.345  | -0.655 |
| Fe7-S2B | 2.295 | 2.120 | 0.370 | 0.623 |        |       | 2.149 | 0.370 | 0.674 |        |        |
| Fe7-S3B | 2.320 | 2.120 | 0.370 | 0.582 |        |       | 2.149 | 0.370 | 0.630 |        |        |
| Fe7-S4B | 2.290 | 2.120 | 0.370 | 0.632 |        |       | 2.149 | 0.370 | 0.683 |        |        |
| Fe7-SG  | 2.390 | 2.120 | 0.370 | 0.482 | 2.319  | 0.319 | 2.149 | 0.370 | 0.521 | 2.508  | -0.492 |
| Fe8-S1  | 2.390 | 2.120 | 0.370 | 0.482 |        |       | 2.149 | 0.370 | 0.521 |        |        |
| Fe8-S3B | 2.263 | 2.120 | 0.370 | 0.679 |        |       | 2.149 | 0.370 | 0.735 |        |        |
| Fe8-S4B | 2.329 | 2.120 | 0.370 | 0.568 |        |       | 2.149 | 0.370 | 0.615 |        |        |
| Fe8-SG  | 2.314 | 2.120 | 0.370 | 0.592 | 2.322  | 0.322 | 2.149 | 0.370 | 0.640 | 2.511  | -0.489 |
|         |       |       |       |       | 18.315 |       |       |       |       | 19.808 |        |

**Table S64** The adopted bond valence analyses for irons in P-cluster [4] from MoFe protein 5CX1 whose conformation resemble as P<sup>N</sup> at 1.75 Å resolution.

| Bond                  | $r_{ij}$ (Å) | $R_0$ (Å) | B (Å) | Bval  | Sum   | Diff.                 | $R_0$ (Å) | B (Å) | Bval  | Sum   | Diff.  |
|-----------------------|--------------|-----------|-------|-------|-------|-----------------------|-----------|-------|-------|-------|--------|
| expected valence = +2 |              |           |       |       |       | expected valence = +3 |           |       |       |       |        |
| Fe1-S1                | 2.416        | 2.120     | 0.370 | 0.449 |       |                       | 2.149     | 0.370 | 0.486 |       |        |
| Fe1-S2A               | 2.294        | 2.120     | 0.370 | 0.625 |       |                       | 2.149     | 0.370 | 0.676 |       |        |
| Fe1-S3A               | 2.285        | 2.120     | 0.370 | 0.640 |       |                       | 2.149     | 0.370 | 0.692 |       |        |
| Fe1-SG                | 2.393        | 2.120     | 0.370 | 0.478 | 2.193 | 0.193                 | 2.149     | 0.370 | 0.517 | 2.371 | -0.629 |
| Fe2-S1                | 2.408        | 2.120     | 0.370 | 0.459 |       |                       | 2.149     | 0.370 | 0.497 |       |        |
| Fe2-S2A               | 2.258        | 2.120     | 0.370 | 0.689 |       |                       | 2.149     | 0.370 | 0.745 |       |        |
| Fe2-S4A               | 2.287        | 2.120     | 0.370 | 0.637 |       |                       | 2.149     | 0.370 | 0.689 |       |        |
| Fe2-SG                | 2.306        | 2.120     | 0.370 | 0.605 | 2.389 | 0.389                 | 2.149     | 0.370 | 0.654 | 2.584 | -0.416 |
| Fe3-S2A               | 2.272        | 2.120     | 0.370 | 0.663 |       |                       | 2.149     | 0.370 | 0.717 |       |        |
| Fe3-S3A               | 2.260        | 2.120     | 0.370 | 0.685 |       |                       | 2.149     | 0.370 | 0.741 |       |        |
| Fe3-S4A               | 2.320        | 2.120     | 0.370 | 0.582 |       |                       | 2.149     | 0.370 | 0.630 |       |        |
| Fe3-SG                | 2.294        | 2.120     | 0.370 | 0.625 | 2.555 | 0.555                 | 2.149     | 0.370 | 0.676 | 2.764 | -0.236 |
| Fe4-S1                | 2.390        | 2.120     | 0.370 | 0.482 |       |                       | 2.149     | 0.370 | 0.521 |       |        |
| Fe4-S3A               | 2.264        | 2.120     | 0.370 | 0.678 |       |                       | 2.149     | 0.370 | 0.733 |       |        |
| Fe4-S4A               | 2.275        | 2.120     | 0.370 | 0.658 |       |                       | 2.149     | 0.370 | 0.711 |       |        |



|         |       |       |       |       |        |       |       |       |       |        |        |
|---------|-------|-------|-------|-------|--------|-------|-------|-------|-------|--------|--------|
| Fe4-SG  | 2.332 | 2.120 | 0.370 | 0.564 | 2.381  | 0.381 | 2.149 | 0.370 | 0.610 | 2.575  | -0.425 |
| Fe5-S1  | 2.463 | 2.120 | 0.370 | 0.396 |        |       | 2.149 | 0.370 | 0.428 |        |        |
| Fe5-S2B | 2.261 | 2.120 | 0.370 | 0.683 |        |       | 2.149 | 0.370 | 0.739 |        |        |
| Fe5-S4B | 2.328 | 2.120 | 0.370 | 0.570 |        |       | 2.149 | 0.370 | 0.616 |        |        |
| Fe5-SG  | 2.465 | 2.120 | 0.370 | 0.394 | 2.042  | 0.042 | 2.149 | 0.370 | 0.426 | 2.209  | -0.791 |
| Fe6-S1  | 2.653 | 2.120 | 0.370 | 0.237 |        |       | 2.149 | 0.370 | 0.256 |        |        |
| Fe6-S2B | 2.258 | 2.120 | 0.370 | 0.689 |        |       | 2.149 | 0.370 | 0.745 |        |        |
| Fe6-S3B | 2.327 | 2.120 | 0.370 | 0.572 |        |       | 2.149 | 0.370 | 0.618 |        |        |
| Fe6-SG  | 2.309 | 2.120 | 0.370 | 0.600 | 2.097  | 0.097 | 2.149 | 0.370 | 0.649 | 2.268  | -0.732 |
| Fe7-S2B | 2.295 | 2.120 | 0.370 | 0.623 |        |       | 2.149 | 0.370 | 0.674 |        |        |
| Fe7-S3B | 2.326 | 2.120 | 0.370 | 0.573 |        |       | 2.149 | 0.370 | 0.620 |        |        |
| Fe7-S4B | 2.321 | 2.120 | 0.370 | 0.581 |        |       | 2.149 | 0.370 | 0.628 |        |        |
| Fe7-SG  | 2.367 | 2.120 | 0.370 | 0.513 | 2.290  | 0.290 | 2.149 | 0.370 | 0.555 | 2.477  | -0.523 |
| Fe8-S1  | 2.410 | 2.120 | 0.370 | 0.457 |        |       | 2.149 | 0.370 | 0.494 |        |        |
| Fe8-S3B | 2.315 | 2.120 | 0.370 | 0.590 |        |       | 2.149 | 0.370 | 0.638 |        |        |
| Fe8-S4B | 2.332 | 2.120 | 0.370 | 0.564 |        |       | 2.149 | 0.370 | 0.610 |        |        |
| Fe8-SG  | 2.305 | 2.120 | 0.370 | 0.607 | 2.217  | 0.217 | 2.149 | 0.370 | 0.656 | 2.398  | -0.602 |
|         |       |       |       |       | 18.165 |       |       |       |       | 19.647 |        |

**Table S65** The adopted bond valence analyses for irons in P-cluster [5] from MoFe protein 5CX1 whose conformation resemble as P<sup>N</sup> at 1.75 Å resolution.

| Bond                  | $r_{ij}$ (Å) | $R_0$ (Å) | B (Å) | Bval  | Sum   | Diff.                 | $R_0$ (Å) | B (Å) | Bval  | Sum   | Diff.  |
|-----------------------|--------------|-----------|-------|-------|-------|-----------------------|-----------|-------|-------|-------|--------|
| expected valence = +2 |              |           |       |       |       | expected valence = +3 |           |       |       |       |        |
| Fe1-S1                | 2.425        | 2.120     | 0.370 | 0.439 |       |                       | 2.149     | 0.370 | 0.474 |       |        |
| Fe1-S2A               | 2.298        | 2.120     | 0.370 | 0.618 |       |                       | 2.149     | 0.370 | 0.669 |       |        |
| Fe1-S3A               | 2.273        | 2.120     | 0.370 | 0.661 |       |                       | 2.149     | 0.370 | 0.715 |       |        |
| Fe1-SG                | 2.340        | 2.120     | 0.370 | 0.552 | 2.270 | 0.270                 | 2.149     | 0.370 | 0.597 | 2.455 | -0.545 |
| Fe2-S1                | 2.418        | 2.120     | 0.370 | 0.447 |       |                       | 2.149     | 0.370 | 0.483 |       |        |
| Fe2-S2A               | 2.295        | 2.120     | 0.370 | 0.623 |       |                       | 2.149     | 0.370 | 0.674 |       |        |
| Fe2-S4A               | 2.287        | 2.120     | 0.370 | 0.637 |       |                       | 2.149     | 0.370 | 0.689 |       |        |
| Fe2-SG                | 2.304        | 2.120     | 0.370 | 0.608 | 2.315 | 0.315                 | 2.149     | 0.370 | 0.658 | 2.504 | -0.496 |
| Fe3-S2A               | 2.266        | 2.120     | 0.370 | 0.674 |       |                       | 2.149     | 0.370 | 0.729 |       |        |
| Fe3-S3A               | 2.251        | 2.120     | 0.370 | 0.702 |       |                       | 2.149     | 0.370 | 0.759 |       |        |
| Fe3-S4A               | 2.318        | 2.120     | 0.370 | 0.586 |       |                       | 2.149     | 0.370 | 0.633 |       |        |
| Fe3-SG                | 2.297        | 2.120     | 0.370 | 0.620 | 2.581 | 0.581                 | 2.149     | 0.370 | 0.670 | 2.792 | -0.208 |
| Fe4-S1                | 2.384        | 2.120     | 0.370 | 0.490 |       |                       | 2.149     | 0.370 | 0.530 |       |        |
| Fe4-S3A               | 2.270        | 2.120     | 0.370 | 0.667 |       |                       | 2.149     | 0.370 | 0.721 |       |        |
| Fe4-S4A               | 2.300        | 2.120     | 0.370 | 0.615 |       |                       | 2.149     | 0.370 | 0.665 |       |        |

|         |       |       |       |       |        |       |       |       |       |        |        |
|---------|-------|-------|-------|-------|--------|-------|-------|-------|-------|--------|--------|
| Fe4-SG  | 2.415 | 2.120 | 0.370 | 0.451 | 2.222  | 0.222 | 2.149 | 0.370 | 0.487 | 2.403  | -0.597 |
| Fe5-S1  | 2.503 | 2.120 | 0.370 | 0.355 |        |       | 2.149 | 0.370 | 0.384 |        |        |
| Fe5-S2B | 2.216 | 2.120 | 0.370 | 0.771 |        |       | 2.149 | 0.370 | 0.834 |        |        |
| Fe5-S4B | 2.328 | 2.120 | 0.370 | 0.570 |        |       | 2.149 | 0.370 | 0.616 |        |        |
| Fe5-SG  | 2.306 | 2.120 | 0.370 | 0.605 | 2.302  | 0.302 | 2.149 | 0.370 | 0.654 | 2.489  | -0.511 |
| Fe6-S1  | 2.584 | 2.120 | 0.370 | 0.285 |        |       | 2.149 | 0.370 | 0.309 |        |        |
| Fe6-S2B | 2.275 | 2.120 | 0.370 | 0.658 |        |       | 2.149 | 0.370 | 0.711 |        |        |
| Fe6-S3B | 2.306 | 2.120 | 0.370 | 0.605 |        |       | 2.149 | 0.370 | 0.654 |        |        |
| Fe6-SG  | 2.317 | 2.120 | 0.370 | 0.587 | 2.135  | 0.135 | 2.149 | 0.370 | 0.635 | 2.309  | -0.691 |
| Fe7-S2B | 2.273 | 2.120 | 0.370 | 0.661 |        |       | 2.149 | 0.370 | 0.715 |        |        |
| Fe7-S3B | 2.309 | 2.120 | 0.370 | 0.600 |        |       | 2.149 | 0.370 | 0.649 |        |        |
| Fe7-S4B | 2.291 | 2.120 | 0.370 | 0.630 |        |       | 2.149 | 0.370 | 0.681 |        |        |
| Fe7-SG  | 2.378 | 2.120 | 0.370 | 0.498 | 2.389  | 0.389 | 2.149 | 0.370 | 0.539 | 2.584  | -0.416 |
| Fe8-S1  | 2.416 | 2.120 | 0.370 | 0.449 |        |       | 2.149 | 0.370 | 0.486 |        |        |
| Fe8-S3B | 2.304 | 2.120 | 0.370 | 0.608 |        |       | 2.149 | 0.370 | 0.658 |        |        |
| Fe8-S4B | 2.311 | 2.120 | 0.370 | 0.597 |        |       | 2.149 | 0.370 | 0.645 |        |        |
| Fe8-SG  | 2.291 | 2.120 | 0.370 | 0.630 | 2.284  | 0.284 | 2.149 | 0.370 | 0.681 | 2.470  | -0.530 |
|         |       |       |       |       | 18.498 |       |       |       |       | 20.006 |        |

**Table S66** The adopted bond valence analyses for irons in P-cluster [6] from MoFe protein 5CX1 whose conformation resemble as P<sup>N</sup> at 1.75 Å resolution.

| Bond                  | $r_{ij}$ (Å) | $R_0$ (Å) | B (Å) | Bval  | Sum   | Diff.                 | $R_0$ (Å) | B (Å) | Bval  | Sum   | Diff.  |
|-----------------------|--------------|-----------|-------|-------|-------|-----------------------|-----------|-------|-------|-------|--------|
| expected valence = +2 |              |           |       |       |       | expected valence = +3 |           |       |       |       |        |
| Fe1-S1                | 2.427        | 2.120     | 0.370 | 0.436 |       |                       | 2.149     | 0.370 | 0.472 |       |        |
| Fe1-S2A               | 2.295        | 2.120     | 0.370 | 0.623 |       |                       | 2.149     | 0.370 | 0.674 |       |        |
| Fe1-S3A               | 2.239        | 2.120     | 0.370 | 0.725 |       |                       | 2.149     | 0.370 | 0.784 |       |        |
| Fe1-SG                | 2.284        | 2.120     | 0.370 | 0.642 | 2.426 | 0.426                 | 2.149     | 0.370 | 0.694 | 2.624 | -0.376 |
| Fe2-S1                | 2.391        | 2.120     | 0.370 | 0.481 |       |                       | 2.149     | 0.370 | 0.520 |       |        |
| Fe2-S2A               | 2.248        | 2.120     | 0.370 | 0.708 |       |                       | 2.149     | 0.370 | 0.765 |       |        |
| Fe2-S4A               | 2.287        | 2.120     | 0.370 | 0.637 |       |                       | 2.149     | 0.370 | 0.689 |       |        |
| Fe2-SG                | 2.304        | 2.120     | 0.370 | 0.608 | 2.433 | 0.433                 | 2.149     | 0.370 | 0.658 | 2.632 | -0.368 |
| Fe3-S2A               | 2.273        | 2.120     | 0.370 | 0.661 |       |                       | 2.149     | 0.370 | 0.715 |       |        |
| Fe3-S3A               | 2.250        | 2.120     | 0.370 | 0.704 |       |                       | 2.149     | 0.370 | 0.761 |       |        |
| Fe3-S4A               | 2.319        | 2.120     | 0.370 | 0.584 |       |                       | 2.149     | 0.370 | 0.632 |       |        |
| Fe3-SG                | 2.298        | 2.120     | 0.370 | 0.618 | 2.567 | 0.567                 | 2.149     | 0.370 | 0.669 | 2.776 | -0.224 |
| Fe4-S1                | 2.362        | 2.120     | 0.370 | 0.520 |       |                       | 2.149     | 0.370 | 0.562 |       |        |
| Fe4-S3A               | 2.285        | 2.120     | 0.370 | 0.640 |       |                       | 2.149     | 0.370 | 0.692 |       |        |
| Fe4-S4A               | 2.288        | 2.120     | 0.370 | 0.635 |       |                       | 2.149     | 0.370 | 0.687 |       |        |

|         |       |       |       |       |        |       |       |       |       |        |        |
|---------|-------|-------|-------|-------|--------|-------|-------|-------|-------|--------|--------|
| Fe4-SG  | 2.303 | 2.120 | 0.370 | 0.610 | 2.405  | 0.405 | 2.149 | 0.370 | 0.660 | 2.601  | -0.399 |
| Fe5-S1  | 2.440 | 2.120 | 0.370 | 0.421 |        |       | 2.149 | 0.370 | 0.455 |        |        |
| Fe5-S2B | 2.230 | 2.120 | 0.370 | 0.743 |        |       | 2.149 | 0.370 | 0.803 |        |        |
| Fe5-S4B | 2.318 | 2.120 | 0.370 | 0.586 |        |       | 2.149 | 0.370 | 0.633 |        |        |
| Fe5-SG  | 2.427 | 2.120 | 0.370 | 0.436 | 2.186  | 0.186 | 2.149 | 0.370 | 0.472 | 2.364  | -0.636 |
| Fe6-S1  | 2.708 | 2.120 | 0.370 | 0.204 |        |       | 2.149 | 0.370 | 0.221 |        |        |
| Fe6-S2B | 2.281 | 2.120 | 0.370 | 0.647 |        |       | 2.149 | 0.370 | 0.700 |        |        |
| Fe6-S3B | 2.303 | 2.120 | 0.370 | 0.610 |        |       | 2.149 | 0.370 | 0.660 |        |        |
| Fe6-SG  | 2.318 | 2.120 | 0.370 | 0.586 | 2.047  | 0.047 | 2.149 | 0.370 | 0.633 | 2.214  | -0.786 |
| Fe7-S2B | 2.289 | 2.120 | 0.370 | 0.633 |        |       | 2.149 | 0.370 | 0.685 |        |        |
| Fe7-S3B | 2.327 | 2.120 | 0.370 | 0.572 |        |       | 2.149 | 0.370 | 0.618 |        |        |
| Fe7-S4B | 2.298 | 2.120 | 0.370 | 0.618 |        |       | 2.149 | 0.370 | 0.669 |        |        |
| Fe7-SG  | 2.363 | 2.120 | 0.370 | 0.519 | 2.341  | 0.341 | 2.149 | 0.370 | 0.561 | 2.532  | -0.468 |
| Fe8-S1  | 2.406 | 2.120 | 0.370 | 0.462 |        |       | 2.149 | 0.370 | 0.499 |        |        |
| Fe8-S3B | 2.278 | 2.120 | 0.370 | 0.652 |        |       | 2.149 | 0.370 | 0.706 |        |        |
| Fe8-S4B | 2.309 | 2.120 | 0.370 | 0.600 |        |       | 2.149 | 0.370 | 0.649 |        |        |
| Fe8-SG  | 2.296 | 2.120 | 0.370 | 0.621 | 2.336  | 0.336 | 2.149 | 0.370 | 0.672 | 2.526  | -0.474 |
|         |       |       |       |       | 18.741 |       |       |       |       | 20.269 |        |

**Table S67** The adopted bond valence analyses for irons in P-cluster [7] from MoFe protein 5CX1 whose conformation resemble as P<sup>N</sup> at 1.75 Å resolution.

| Bond                  | $r_{ij}$ (Å) | $R_0$ (Å) | B (Å) | Bval  | Sum   | Diff.                 | $R_0$ (Å) | B (Å) | Bval  | Sum   | Diff.  |
|-----------------------|--------------|-----------|-------|-------|-------|-----------------------|-----------|-------|-------|-------|--------|
| expected valence = +2 |              |           |       |       |       | expected valence = +3 |           |       |       |       |        |
| Fe1-S1                | 2.446        | 2.120     | 0.370 | 0.414 |       |                       | 2.149     | 0.370 | 0.448 |       |        |
| Fe1-S2A               | 2.268        | 2.120     | 0.370 | 0.670 |       |                       | 2.149     | 0.370 | 0.725 |       |        |
| Fe1-S3A               | 2.298        | 2.120     | 0.370 | 0.618 |       |                       | 2.149     | 0.370 | 0.669 |       |        |
| Fe1-SG                | 2.339        | 2.120     | 0.370 | 0.553 | 2.256 | 0.256                 | 2.149     | 0.370 | 0.598 | 2.440 | -0.560 |
| Fe2-S1                | 2.417        | 2.120     | 0.370 | 0.448 |       |                       | 2.149     | 0.370 | 0.485 |       |        |
| Fe2-S2A               | 2.275        | 2.120     | 0.370 | 0.658 |       |                       | 2.149     | 0.370 | 0.711 |       |        |
| Fe2-S4A               | 2.249        | 2.120     | 0.370 | 0.706 |       |                       | 2.149     | 0.370 | 0.763 |       |        |
| Fe2-SG                | 2.312        | 2.120     | 0.370 | 0.595 | 2.407 | 0.407                 | 2.149     | 0.370 | 0.644 | 2.603 | -0.397 |
| Fe3-S2A               | 2.284        | 2.120     | 0.370 | 0.642 |       |                       | 2.149     | 0.370 | 0.694 |       |        |
| Fe3-S3A               | 2.260        | 2.120     | 0.370 | 0.685 |       |                       | 2.149     | 0.370 | 0.741 |       |        |
| Fe3-S4A               | 2.326        | 2.120     | 0.370 | 0.573 |       |                       | 2.149     | 0.370 | 0.620 |       |        |
| Fe3-SG                | 2.324        | 2.120     | 0.370 | 0.576 | 2.476 | 0.476                 | 2.149     | 0.370 | 0.623 | 2.678 | -0.322 |
| Fe4-S1                | 2.348        | 2.120     | 0.370 | 0.540 |       |                       | 2.149     | 0.370 | 0.584 |       |        |
| Fe4-S3A               | 2.258        | 2.120     | 0.370 | 0.689 |       |                       | 2.149     | 0.370 | 0.745 |       |        |
| Fe4-S4A               | 2.275        | 2.120     | 0.370 | 0.658 |       |                       | 2.149     | 0.370 | 0.711 |       |        |

|         |       |       |       |       |        |       |       |       |       |        |        |
|---------|-------|-------|-------|-------|--------|-------|-------|-------|-------|--------|--------|
| Fe4-SG  | 2.389 | 2.120 | 0.370 | 0.483 | 2.370  | 0.370 | 2.149 | 0.370 | 0.523 | 2.563  | -0.437 |
| Fe5-S1  | 2.510 | 2.120 | 0.370 | 0.349 |        |       | 2.149 | 0.370 | 0.377 |        |        |
| Fe5-S2B | 2.235 | 2.120 | 0.370 | 0.733 |        |       | 2.149 | 0.370 | 0.793 |        |        |
| Fe5-S4B | 2.306 | 2.120 | 0.370 | 0.605 |        |       | 2.149 | 0.370 | 0.654 |        |        |
| Fe5-SG  | 2.296 | 2.120 | 0.370 | 0.621 | 2.308  | 0.308 | 2.149 | 0.370 | 0.672 | 2.496  | -0.504 |
| Fe6-S1  | 2.611 | 2.120 | 0.370 | 0.265 |        |       | 2.149 | 0.370 | 0.287 |        |        |
| Fe6-S2B | 2.251 | 2.120 | 0.370 | 0.702 |        |       | 2.149 | 0.370 | 0.759 |        |        |
| Fe6-S3B | 2.333 | 2.120 | 0.370 | 0.562 |        |       | 2.149 | 0.370 | 0.608 |        |        |
| Fe6-SG  | 2.295 | 2.120 | 0.370 | 0.623 | 2.153  | 0.153 | 2.149 | 0.370 | 0.674 | 2.328  | -0.672 |
| Fe7-S2B | 2.266 | 2.120 | 0.370 | 0.674 |        |       | 2.149 | 0.370 | 0.729 |        |        |
| Fe7-S3B | 2.328 | 2.120 | 0.370 | 0.570 |        |       | 2.149 | 0.370 | 0.616 |        |        |
| Fe7-S4B | 2.318 | 2.120 | 0.370 | 0.586 |        |       | 2.149 | 0.370 | 0.633 |        |        |
| Fe7-SG  | 2.392 | 2.120 | 0.370 | 0.479 | 2.309  | 0.309 | 2.149 | 0.370 | 0.519 | 2.497  | -0.503 |
| Fe8-S1  | 2.408 | 2.120 | 0.370 | 0.459 |        |       | 2.149 | 0.370 | 0.497 |        |        |
| Fe8-S3B | 2.290 | 2.120 | 0.370 | 0.632 |        |       | 2.149 | 0.370 | 0.683 |        |        |
| Fe8-S4B | 2.319 | 2.120 | 0.370 | 0.584 |        |       | 2.149 | 0.370 | 0.632 |        |        |
| Fe8-SG  | 2.303 | 2.120 | 0.370 | 0.610 | 2.285  | 0.285 | 2.149 | 0.370 | 0.660 | 2.471  | -0.529 |
|         |       |       |       |       | 18.563 |       |       |       |       | 20.076 |        |

**Table S68** The adopted bond valence analyses for irons in P-cluster [8] from MoFe protein 5CX1 whose conformation resemble as P<sup>N</sup> at 1.75 Å resolution.

| Bond                  | $r_{ij}$ (Å) | $R_0$ (Å) | B (Å) | Bval  | Sum   | Diff.                 | $R_0$ (Å) | B (Å) | Bval  | Sum   | Diff.  |
|-----------------------|--------------|-----------|-------|-------|-------|-----------------------|-----------|-------|-------|-------|--------|
| expected valence = +2 |              |           |       |       |       | expected valence = +3 |           |       |       |       |        |
| Fe1-S1                | 2.447        | 2.120     | 0.370 | 0.413 |       |                       | 2.149     | 0.370 | 0.447 |       |        |
| Fe1-S2A               | 2.250        | 2.120     | 0.370 | 0.704 |       |                       | 2.149     | 0.370 | 0.761 |       |        |
| Fe1-S3A               | 2.278        | 2.120     | 0.370 | 0.652 |       |                       | 2.149     | 0.370 | 0.706 |       |        |
| Fe1-SG                | 2.325        | 2.120     | 0.370 | 0.575 | 2.344 | 0.344                 | 2.149     | 0.370 | 0.621 | 2.535 | -0.465 |
| Fe2-S1                | 2.420        | 2.120     | 0.370 | 0.444 |       |                       | 2.149     | 0.370 | 0.481 |       |        |
| Fe2-S2A               | 2.284        | 2.120     | 0.370 | 0.642 |       |                       | 2.149     | 0.370 | 0.694 |       |        |
| Fe2-S4A               | 2.266        | 2.120     | 0.370 | 0.674 |       |                       | 2.149     | 0.370 | 0.729 |       |        |
| Fe2-SG                | 2.299        | 2.120     | 0.370 | 0.616 | 2.377 | 0.377                 | 2.149     | 0.370 | 0.667 | 2.571 | -0.429 |
| Fe3-S2A               | 2.281        | 2.120     | 0.370 | 0.647 |       |                       | 2.149     | 0.370 | 0.700 |       |        |
| Fe3-S3A               | 2.258        | 2.120     | 0.370 | 0.689 |       |                       | 2.149     | 0.370 | 0.745 |       |        |
| Fe3-S4A               | 2.322        | 2.120     | 0.370 | 0.579 |       |                       | 2.149     | 0.370 | 0.627 |       |        |
| Fe3-SG                | 2.295        | 2.120     | 0.370 | 0.623 | 2.538 | 0.538                 | 2.149     | 0.370 | 0.674 | 2.745 | -0.255 |
| Fe4-S1                | 2.377        | 2.120     | 0.370 | 0.499 |       |                       | 2.149     | 0.370 | 0.540 |       |        |
| Fe4-S3A               | 2.308        | 2.120     | 0.370 | 0.602 |       |                       | 2.149     | 0.370 | 0.651 |       |        |
| Fe4-S4A               | 2.293        | 2.120     | 0.370 | 0.627 |       |                       | 2.149     | 0.370 | 0.678 |       |        |



|         |       |       |       |       |        |       |       |       |       |        |        |
|---------|-------|-------|-------|-------|--------|-------|-------|-------|-------|--------|--------|
| Fe4-SG  | 2.327 | 2.120 | 0.370 | 0.572 | 2.299  | 0.299 | 2.149 | 0.370 | 0.618 | 2.486  | -0.514 |
| Fe5-S1  | 2.569 | 2.120 | 0.370 | 0.297 |        |       | 2.149 | 0.370 | 0.321 |        |        |
| Fe5-S2B | 2.218 | 2.120 | 0.370 | 0.767 |        |       | 2.149 | 0.370 | 0.830 |        |        |
| Fe5-S4B | 2.292 | 2.120 | 0.370 | 0.628 |        |       | 2.149 | 0.370 | 0.679 |        |        |
| Fe5-SG  | 2.429 | 2.120 | 0.370 | 0.434 | 2.126  | 0.126 | 2.149 | 0.370 | 0.469 | 2.300  | -0.700 |
| Fe6-S1  | 2.597 | 2.120 | 0.370 | 0.275 |        |       | 2.149 | 0.370 | 0.298 |        |        |
| Fe6-S2B | 2.251 | 2.120 | 0.370 | 0.702 |        |       | 2.149 | 0.370 | 0.759 |        |        |
| Fe6-S3B | 2.329 | 2.120 | 0.370 | 0.568 |        |       | 2.149 | 0.370 | 0.615 |        |        |
| Fe6-SG  | 2.298 | 2.120 | 0.370 | 0.618 | 2.164  | 0.164 | 2.149 | 0.370 | 0.669 | 2.340  | -0.660 |
| Fe7-S2B | 2.309 | 2.120 | 0.370 | 0.600 |        |       | 2.149 | 0.370 | 0.649 |        |        |
| Fe7-S3B | 2.342 | 2.120 | 0.370 | 0.549 |        |       | 2.149 | 0.370 | 0.594 |        |        |
| Fe7-S4B | 2.303 | 2.120 | 0.370 | 0.610 |        |       | 2.149 | 0.370 | 0.660 |        |        |
| Fe7-SG  | 2.339 | 2.120 | 0.370 | 0.553 | 2.312  | 0.312 | 2.149 | 0.370 | 0.598 | 2.500  | -0.500 |
| Fe8-S1  | 2.375 | 2.120 | 0.370 | 0.502 |        |       | 2.149 | 0.370 | 0.543 |        |        |
| Fe8-S3B | 2.298 | 2.120 | 0.370 | 0.618 |        |       | 2.149 | 0.370 | 0.669 |        |        |
| Fe8-S4B | 2.342 | 2.120 | 0.370 | 0.549 |        |       | 2.149 | 0.370 | 0.594 |        |        |
| Fe8-SG  | 2.287 | 2.120 | 0.370 | 0.637 | 2.306  | 0.306 | 2.149 | 0.370 | 0.689 | 2.494  | -0.506 |
|         |       |       |       |       | 18.466 |       |       |       |       | 19.972 |        |

**Table S69** The adopted bond valence analyses for irons in P-cluster [1] from MoFe protein 5KOH which is reported as P<sup>N</sup> at 1.83 Å resolution.

| Bond                  | $r_{ij}$ (Å) | $R_0$ (Å) | B (Å) | Bval  | Sum   | Diff.                 | $R_0$ (Å) | B (Å) | Bval  | Sum   | Diff.  |
|-----------------------|--------------|-----------|-------|-------|-------|-----------------------|-----------|-------|-------|-------|--------|
| expected valence = +2 |              |           |       |       |       | expected valence = +3 |           |       |       |       |        |
| Fe1-S1                | 2.491        | 2.120     | 0.370 | 0.367 |       |                       | 2.149     | 0.370 | 0.397 |       |        |
| Fe1-S2A               | 2.266        | 2.120     | 0.370 | 0.674 |       |                       | 2.149     | 0.370 | 0.729 |       |        |
| Fe1-S3A               | 2.250        | 2.120     | 0.370 | 0.704 |       |                       | 2.149     | 0.370 | 0.761 |       |        |
| Fe1-SG                | 2.374        | 2.120     | 0.370 | 0.503 | 2.248 | 0.248                 | 2.149     | 0.370 | 0.544 | 2.431 | -0.569 |
| Fe2-S1                | 2.368        | 2.120     | 0.370 | 0.512 |       |                       | 2.149     | 0.370 | 0.553 |       |        |
| Fe2-S2A               | 2.307        | 2.120     | 0.370 | 0.603 |       |                       | 2.149     | 0.370 | 0.652 |       |        |
| Fe2-S4A               | 2.300        | 2.120     | 0.370 | 0.615 |       |                       | 2.149     | 0.370 | 0.665 |       |        |
| Fe2-SG                | 2.319        | 2.120     | 0.370 | 0.584 | 2.314 | 0.314                 | 2.149     | 0.370 | 0.632 | 2.502 | -0.498 |
| Fe3-S2A               | 2.305        | 2.120     | 0.370 | 0.607 |       |                       | 2.149     | 0.370 | 0.656 |       |        |
| Fe3-S3A               | 2.262        | 2.120     | 0.370 | 0.681 |       |                       | 2.149     | 0.370 | 0.737 |       |        |
| Fe3-S4A               | 2.320        | 2.120     | 0.370 | 0.582 |       |                       | 2.149     | 0.370 | 0.630 |       |        |
| Fe3-SG                | 2.251        | 2.120     | 0.370 | 0.702 | 2.572 | 0.572                 | 2.149     | 0.370 | 0.759 | 2.782 | -0.218 |
| Fe4-S1                | 2.341        | 2.120     | 0.370 | 0.550 |       |                       | 2.149     | 0.370 | 0.595 |       |        |
| Fe4-S3A               | 2.297        | 2.120     | 0.370 | 0.620 |       |                       | 2.149     | 0.370 | 0.670 |       |        |
| Fe4-S4A               | 2.282        | 2.120     | 0.370 | 0.645 |       |                       | 2.149     | 0.370 | 0.698 |       |        |

|         |       |       |       |       |        |       |       |       |       |        |        |
|---------|-------|-------|-------|-------|--------|-------|-------|-------|-------|--------|--------|
| Fe4-SG  | 2.310 | 2.120 | 0.370 | 0.598 | 2.414  | 0.414 | 2.149 | 0.370 | 0.647 | 2.611  | -0.389 |
| Fe5-S1  | 2.491 | 2.120 | 0.370 | 0.367 |        |       | 2.149 | 0.370 | 0.397 |        |        |
| Fe5-S2B | 2.280 | 2.120 | 0.370 | 0.649 |        |       | 2.149 | 0.370 | 0.702 |        |        |
| Fe5-S4B | 2.301 | 2.120 | 0.370 | 0.613 |        |       | 2.149 | 0.370 | 0.663 |        |        |
| Fe5-SG  | 2.319 | 2.120 | 0.370 | 0.584 | 2.213  | 0.213 | 2.149 | 0.370 | 0.632 | 2.393  | -0.607 |
| Fe6-S1  | 2.515 | 2.120 | 0.370 | 0.344 |        |       | 2.149 | 0.370 | 0.372 |        |        |
| Fe6-S2B | 2.314 | 2.120 | 0.370 | 0.592 |        |       | 2.149 | 0.370 | 0.640 |        |        |
| Fe6-S3B | 2.307 | 2.120 | 0.370 | 0.603 |        |       | 2.149 | 0.370 | 0.652 |        |        |
| Fe6-SG  | 2.317 | 2.120 | 0.370 | 0.587 | 2.126  | 0.126 | 2.149 | 0.370 | 0.635 | 2.300  | -0.700 |
| Fe7-S2B | 2.294 | 2.120 | 0.370 | 0.625 |        |       | 2.149 | 0.370 | 0.676 |        |        |
| Fe7-S3B | 2.308 | 2.120 | 0.370 | 0.602 |        |       | 2.149 | 0.370 | 0.651 |        |        |
| Fe7-S4B | 2.343 | 2.120 | 0.370 | 0.547 |        |       | 2.149 | 0.370 | 0.592 |        |        |
| Fe7-SG  | 2.333 | 2.120 | 0.370 | 0.562 | 2.336  | 0.336 | 2.149 | 0.370 | 0.608 | 2.527  | -0.473 |
| Fe8-S1  | 2.503 | 2.120 | 0.370 | 0.355 |        |       | 2.149 | 0.370 | 0.384 |        |        |
| Fe8-S3B | 2.290 | 2.120 | 0.370 | 0.632 |        |       | 2.149 | 0.370 | 0.683 |        |        |
| Fe8-S4B | 2.298 | 2.120 | 0.370 | 0.618 |        |       | 2.149 | 0.370 | 0.669 |        |        |
| Fe8-SG  | 2.252 | 2.120 | 0.370 | 0.700 | 2.305  | 0.305 | 2.149 | 0.370 | 0.757 | 2.493  | -0.507 |
|         |       |       |       |       | 18.528 |       |       |       |       | 20.038 |        |

**Table S70** The adopted bond valence analyses for irons in P-cluster [2] from MoFe protein 5KOH which is reported as P<sup>N</sup> at 1.83 Å resolution.

| Bond                  | $r_{ij}$ (Å) | $R_0$ (Å) | B (Å) | Bval  | Sum   | Diff.                 | $R_0$ (Å) | B (Å) | Bval  | Sum   | Diff.  |
|-----------------------|--------------|-----------|-------|-------|-------|-----------------------|-----------|-------|-------|-------|--------|
| expected valence = +2 |              |           |       |       |       | expected valence = +3 |           |       |       |       |        |
| Fe1-S1                | 2.500        | 2.120     | 0.370 | 0.358 |       |                       | 2.149     | 0.370 | 0.387 |       |        |
| Fe1-S2A               | 2.306        | 2.120     | 0.370 | 0.605 |       |                       | 2.149     | 0.370 | 0.654 |       |        |
| Fe1-S3A               | 2.240        | 2.120     | 0.370 | 0.723 |       |                       | 2.149     | 0.370 | 0.782 |       |        |
| Fe1-SG                | 2.356        | 2.120     | 0.370 | 0.528 | 2.214 | 0.214                 | 2.149     | 0.370 | 0.572 | 2.395 | -0.605 |
| Fe2-S1                | 2.395        | 2.120     | 0.370 | 0.476 |       |                       | 2.149     | 0.370 | 0.514 |       |        |
| Fe2-S2A               | 2.286        | 2.120     | 0.370 | 0.638 |       |                       | 2.149     | 0.370 | 0.691 |       |        |
| Fe2-S4A               | 2.288        | 2.120     | 0.370 | 0.635 |       |                       | 2.149     | 0.370 | 0.687 |       |        |
| Fe2-SG                | 2.321        | 2.120     | 0.370 | 0.581 | 2.330 | 0.330                 | 2.149     | 0.370 | 0.628 | 2.520 | -0.480 |
| Fe3-S2A               | 2.275        | 2.120     | 0.370 | 0.658 |       |                       | 2.149     | 0.370 | 0.711 |       |        |
| Fe3-S3A               | 2.280        | 2.120     | 0.370 | 0.649 |       |                       | 2.149     | 0.370 | 0.702 |       |        |
| Fe3-S4A               | 2.306        | 2.120     | 0.370 | 0.605 |       |                       | 2.149     | 0.370 | 0.654 |       |        |
| Fe3-SG                | 2.306        | 2.120     | 0.370 | 0.605 | 2.516 | 0.516                 | 2.149     | 0.370 | 0.654 | 2.722 | -0.278 |
| Fe4-S1                | 2.368        | 2.120     | 0.370 | 0.512 |       |                       | 2.149     | 0.370 | 0.553 |       |        |
| Fe4-S3A               | 2.274        | 2.120     | 0.370 | 0.660 |       |                       | 2.149     | 0.370 | 0.713 |       |        |
| Fe4-S4A               | 2.265        | 2.120     | 0.370 | 0.676 |       |                       | 2.149     | 0.370 | 0.731 |       |        |

|         |       |       |       |       |        |       |       |       |       |        |        |
|---------|-------|-------|-------|-------|--------|-------|-------|-------|-------|--------|--------|
| Fe4-SG  | 2.326 | 2.120 | 0.370 | 0.573 | 2.420  | 0.420 | 2.149 | 0.370 | 0.620 | 2.617  | -0.383 |
| Fe5-S1  | 2.455 | 2.120 | 0.370 | 0.404 |        |       | 2.149 | 0.370 | 0.437 |        |        |
| Fe5-S2B | 2.272 | 2.120 | 0.370 | 0.663 |        |       | 2.149 | 0.370 | 0.717 |        |        |
| Fe5-S4B | 2.313 | 2.120 | 0.370 | 0.594 |        |       | 2.149 | 0.370 | 0.642 |        |        |
| Fe5-SG  | 2.366 | 2.120 | 0.370 | 0.514 | 2.175  | 0.175 | 2.149 | 0.370 | 0.556 | 2.353  | -0.647 |
| Fe6-S1  | 2.493 | 2.120 | 0.370 | 0.365 |        |       | 2.149 | 0.370 | 0.395 |        |        |
| Fe6-S2B | 2.297 | 2.120 | 0.370 | 0.620 |        |       | 2.149 | 0.370 | 0.670 |        |        |
| Fe6-S3B | 2.317 | 2.120 | 0.370 | 0.587 |        |       | 2.149 | 0.370 | 0.635 |        |        |
| Fe6-SG  | 2.369 | 2.120 | 0.370 | 0.510 | 2.082  | 0.082 | 2.149 | 0.370 | 0.552 | 2.252  | -0.748 |
| Fe7-S2B | 2.289 | 2.120 | 0.370 | 0.633 |        |       | 2.149 | 0.370 | 0.685 |        |        |
| Fe7-S3B | 2.295 | 2.120 | 0.370 | 0.623 |        |       | 2.149 | 0.370 | 0.674 |        |        |
| Fe7-S4B | 2.335 | 2.120 | 0.370 | 0.559 |        |       | 2.149 | 0.370 | 0.605 |        |        |
| Fe7-SG  | 2.335 | 2.120 | 0.370 | 0.559 | 2.375  | 0.375 | 2.149 | 0.370 | 0.605 | 2.569  | -0.431 |
| Fe8-S1  | 2.493 | 2.120 | 0.370 | 0.365 |        |       | 2.149 | 0.370 | 0.395 |        |        |
| Fe8-S3B | 2.310 | 2.120 | 0.370 | 0.598 |        |       | 2.149 | 0.370 | 0.647 |        |        |
| Fe8-S4B | 2.312 | 2.120 | 0.370 | 0.595 |        |       | 2.149 | 0.370 | 0.644 |        |        |
| Fe8-SG  | 2.235 | 2.120 | 0.370 | 0.733 | 2.291  | 0.291 | 2.149 | 0.370 | 0.793 | 2.478  | -0.522 |
|         |       |       |       |       | 18.405 |       |       |       |       | 19.905 |        |

**Table S71** The adopted bond valence analyses for irons in P-cluster [1] from MoFe protein 5VPW which is reported as P<sup>N</sup> at 1.85 Å resolution.

| Bond                  | $r_{ij}$ (Å) | $R_0$ (Å) | B (Å) | Bval  | Sum   | Diff.                 | $R_0$ (Å) | B (Å) | Bval  | Sum   | Diff.  |
|-----------------------|--------------|-----------|-------|-------|-------|-----------------------|-----------|-------|-------|-------|--------|
| expected valence = +2 |              |           |       |       |       | expected valence = +3 |           |       |       |       |        |
| Fe1-S1                | 2.389        | 2.120     | 0.370 | 0.483 |       |                       | 2.149     | 0.370 | 0.523 |       |        |
| Fe1-S2A               | 2.316        | 2.120     | 0.370 | 0.589 |       |                       | 2.149     | 0.370 | 0.637 |       |        |
| Fe1-S3A               | 2.278        | 2.120     | 0.370 | 0.652 |       |                       | 2.149     | 0.370 | 0.706 |       |        |
| Fe1-SG                | 2.321        | 2.120     | 0.370 | 0.581 | 2.305 | 0.305                 | 2.149     | 0.370 | 0.628 | 2.493 | -0.507 |
| Fe2-S1                | 2.415        | 2.120     | 0.370 | 0.451 |       |                       | 2.149     | 0.370 | 0.487 |       |        |
| Fe2-S2A               | 2.273        | 2.120     | 0.370 | 0.661 |       |                       | 2.149     | 0.370 | 0.715 |       |        |
| Fe2-S4A               | 2.281        | 2.120     | 0.370 | 0.647 |       |                       | 2.149     | 0.370 | 0.700 |       |        |
| Fe2-SG                | 2.314        | 2.120     | 0.370 | 0.592 | 2.351 | 0.351                 | 2.149     | 0.370 | 0.640 | 2.543 | -0.457 |
| Fe3-S2A               | 2.293        | 2.120     | 0.370 | 0.627 |       |                       | 2.149     | 0.370 | 0.678 |       |        |
| Fe3-S3A               | 2.331        | 2.120     | 0.370 | 0.565 |       |                       | 2.149     | 0.370 | 0.611 |       |        |
| Fe3-S4A               | 2.288        | 2.120     | 0.370 | 0.635 |       |                       | 2.149     | 0.370 | 0.687 |       |        |
| Fe3-SG                | 2.287        | 2.120     | 0.370 | 0.637 | 2.464 | 0.464                 | 2.149     | 0.370 | 0.689 | 2.665 | -0.335 |
| Fe4-S1                | 2.402        | 2.120     | 0.370 | 0.467 |       |                       | 2.149     | 0.370 | 0.505 |       |        |
| Fe4-S3A               | 2.242        | 2.120     | 0.370 | 0.719 |       |                       | 2.149     | 0.370 | 0.778 |       |        |
| Fe4-S4A               | 2.236        | 2.120     | 0.370 | 0.731 |       |                       | 2.149     | 0.370 | 0.790 |       |        |

|         |       |       |       |       |        |        |       |       |       |        |        |
|---------|-------|-------|-------|-------|--------|--------|-------|-------|-------|--------|--------|
| Fe4-SG  | 2.382 | 2.120 | 0.370 | 0.493 | 2.409  | 0.409  | 2.149 | 0.370 | 0.533 | 2.606  | -0.394 |
| Fe5-S1  | 2.545 | 2.120 | 0.370 | 0.317 |        |        | 2.149 | 0.370 | 0.343 |        |        |
| Fe5-S2B | 2.400 | 2.120 | 0.370 | 0.469 |        |        | 2.149 | 0.370 | 0.507 |        |        |
| Fe5-S4B | 2.245 | 2.120 | 0.370 | 0.713 |        |        | 2.149 | 0.370 | 0.771 |        |        |
| Fe5-SG  | 2.333 | 2.120 | 0.370 | 0.562 | 2.062  | 0.062  | 2.149 | 0.370 | 0.608 | 2.230  | -0.770 |
| Fe6-S1  | 2.565 | 2.120 | 0.370 | 0.300 |        |        | 2.149 | 0.370 | 0.325 |        |        |
| Fe6-S2B | 2.441 | 2.120 | 0.370 | 0.420 |        |        | 2.149 | 0.370 | 0.454 |        |        |
| Fe6-S3B | 2.317 | 2.120 | 0.370 | 0.587 |        |        | 2.149 | 0.370 | 0.635 |        |        |
| Fe6-SG  | 2.324 | 2.120 | 0.370 | 0.576 | 1.884  | -0.116 | 2.149 | 0.370 | 0.623 | 2.037  | -0.963 |
| Fe7-S2B | 2.313 | 2.120 | 0.370 | 0.594 |        |        | 2.149 | 0.370 | 0.642 |        |        |
| Fe7-S3B | 2.323 | 2.120 | 0.370 | 0.578 |        |        | 2.149 | 0.370 | 0.625 |        |        |
| Fe7-S4B | 2.336 | 2.120 | 0.370 | 0.558 |        |        | 2.149 | 0.370 | 0.603 |        |        |
| Fe7-SG  | 2.298 | 2.120 | 0.370 | 0.618 | 2.347  | 0.347  | 2.149 | 0.370 | 0.669 | 2.539  | -0.461 |
| Fe8-S1  | 2.369 | 2.120 | 0.370 | 0.510 |        |        | 2.149 | 0.370 | 0.552 |        |        |
| Fe8-S3B | 2.317 | 2.120 | 0.370 | 0.587 |        |        | 2.149 | 0.370 | 0.635 |        |        |
| Fe8-S4B | 2.287 | 2.120 | 0.370 | 0.637 |        |        | 2.149 | 0.370 | 0.689 |        |        |
| Fe8-SG  | 2.391 | 2.120 | 0.370 | 0.481 | 2.215  | 0.215  | 2.149 | 0.370 | 0.520 | 2.395  | -0.605 |
|         |       |       |       |       | 18.037 |        |       |       |       | 19.508 |        |

**Table S72** The adopted bond valence analyses for irons in P-cluster [2] from MoFe protein 5VPW which is reported as P<sup>N</sup> at 1.85 Å resolution.

| Bond                  | $r_{ij}$ (Å) | $R_0$ (Å) | B (Å) | Bval  | Sum   | Diff.                 | $R_0$ (Å) | B (Å) | Bval  | Sum   | Diff.  |
|-----------------------|--------------|-----------|-------|-------|-------|-----------------------|-----------|-------|-------|-------|--------|
| expected valence = +2 |              |           |       |       |       | expected valence = +3 |           |       |       |       |        |
| Fe1-S1                | 2.416        | 2.120     | 0.370 | 0.449 |       |                       | 2.149     | 0.370 | 0.486 |       |        |
| Fe1-S2A               | 2.298        | 2.120     | 0.370 | 0.618 |       |                       | 2.149     | 0.370 | 0.669 |       |        |
| Fe1-S3A               | 2.299        | 2.120     | 0.370 | 0.616 |       |                       | 2.149     | 0.370 | 0.667 |       |        |
| Fe1-SG                | 2.342        | 2.120     | 0.370 | 0.549 | 2.233 | 0.233                 | 2.149     | 0.370 | 0.594 | 2.415 | -0.585 |
| Fe2-S1                | 2.470        | 2.120     | 0.370 | 0.388 |       |                       | 2.149     | 0.370 | 0.420 |       |        |
| Fe2-S2A               | 2.289        | 2.120     | 0.370 | 0.633 |       |                       | 2.149     | 0.370 | 0.685 |       |        |
| Fe2-S4A               | 2.300        | 2.120     | 0.370 | 0.615 |       |                       | 2.149     | 0.370 | 0.665 |       |        |
| Fe2-SG                | 2.334        | 2.120     | 0.370 | 0.561 | 2.197 | 0.197                 | 2.149     | 0.370 | 0.607 | 2.376 | -0.624 |
| Fe3-S2A               | 2.293        | 2.120     | 0.370 | 0.627 |       |                       | 2.149     | 0.370 | 0.678 |       |        |
| Fe3-S3A               | 2.318        | 2.120     | 0.370 | 0.586 |       |                       | 2.149     | 0.370 | 0.633 |       |        |
| Fe3-S4A               | 2.291        | 2.120     | 0.370 | 0.630 |       |                       | 2.149     | 0.370 | 0.681 |       |        |
| Fe3-SG                | 2.321        | 2.120     | 0.370 | 0.581 | 2.423 | 0.423                 | 2.149     | 0.370 | 0.628 | 2.620 | -0.380 |
| Fe4-S1                | 2.371        | 2.120     | 0.370 | 0.507 |       |                       | 2.149     | 0.370 | 0.549 |       |        |
| Fe4-S3A               | 2.324        | 2.120     | 0.370 | 0.576 |       |                       | 2.149     | 0.370 | 0.623 |       |        |
| Fe4-S4A               | 2.259        | 2.120     | 0.370 | 0.687 |       |                       | 2.149     | 0.370 | 0.743 |       |        |



|         |       |       |       |       |        |        |       |       |       |        |        |
|---------|-------|-------|-------|-------|--------|--------|-------|-------|-------|--------|--------|
| Fe4-SG  | 2.307 | 2.120 | 0.370 | 0.603 | 2.374  | 0.374  | 2.149 | 0.370 | 0.652 | 2.567  | -0.433 |
| Fe5-S1  | 2.542 | 2.120 | 0.370 | 0.320 |        |        | 2.149 | 0.370 | 0.346 |        |        |
| Fe5-S2B | 2.349 | 2.120 | 0.370 | 0.539 |        |        | 2.149 | 0.370 | 0.582 |        |        |
| Fe5-S4B | 2.283 | 2.120 | 0.370 | 0.644 |        |        | 2.149 | 0.370 | 0.696 |        |        |
| Fe5-SG  | 2.297 | 2.120 | 0.370 | 0.620 | 2.122  | 0.122  | 2.149 | 0.370 | 0.670 | 2.295  | -0.705 |
| Fe6-S1  | 2.524 | 2.120 | 0.370 | 0.336 |        |        | 2.149 | 0.370 | 0.363 |        |        |
| Fe6-S2B | 2.428 | 2.120 | 0.370 | 0.435 |        |        | 2.149 | 0.370 | 0.470 |        |        |
| Fe6-S3B | 2.314 | 2.120 | 0.370 | 0.592 |        |        | 2.149 | 0.370 | 0.640 |        |        |
| Fe6-SG  | 2.337 | 2.120 | 0.370 | 0.556 | 1.919  | -0.081 | 2.149 | 0.370 | 0.602 | 2.075  | -0.925 |
| Fe7-S2B | 2.356 | 2.120 | 0.370 | 0.528 |        |        | 2.149 | 0.370 | 0.572 |        |        |
| Fe7-S3B | 2.331 | 2.120 | 0.370 | 0.565 |        |        | 2.149 | 0.370 | 0.611 |        |        |
| Fe7-S4B | 2.320 | 2.120 | 0.370 | 0.582 |        |        | 2.149 | 0.370 | 0.630 |        |        |
| Fe7-SG  | 2.333 | 2.120 | 0.370 | 0.562 | 2.239  | 0.239  | 2.149 | 0.370 | 0.608 | 2.421  | -0.579 |
| Fe8-S1  | 2.367 | 2.120 | 0.370 | 0.513 |        |        | 2.149 | 0.370 | 0.555 |        |        |
| Fe8-S3B | 2.300 | 2.120 | 0.370 | 0.615 |        |        | 2.149 | 0.370 | 0.665 |        |        |
| Fe8-S4B | 2.313 | 2.120 | 0.370 | 0.594 |        |        | 2.149 | 0.370 | 0.642 |        |        |
| Fe8-SG  | 2.367 | 2.120 | 0.370 | 0.513 | 2.234  | 0.234  | 2.149 | 0.370 | 0.555 | 2.416  | -0.584 |
|         |       |       |       |       | 17.740 |        |       |       |       | 19.186 |        |

**Table S73** The adopted bond valence analyses for irons in P-cluster [1] from MoFe protein 5VQ3 which is reported as P<sup>N</sup> at 1.72 Å resolution.

| Bond                  | $r_{ij}$ (Å) | $R_0$ (Å) | B (Å) | Bval  | Sum   | Diff.                 | $R_0$ (Å) | B (Å) | Bval  | Sum   | Diff.  |
|-----------------------|--------------|-----------|-------|-------|-------|-----------------------|-----------|-------|-------|-------|--------|
| expected valence = +2 |              |           |       |       |       | expected valence = +3 |           |       |       |       |        |
| Fe1-S1                | 2.419        | 2.120     | 0.370 | 0.446 |       |                       | 2.149     | 0.370 | 0.482 |       |        |
| Fe1-S2A               | 2.332        | 2.120     | 0.370 | 0.564 |       |                       | 2.149     | 0.370 | 0.610 |       |        |
| Fe1-S3A               | 2.293        | 2.120     | 0.370 | 0.627 |       |                       | 2.149     | 0.370 | 0.678 |       |        |
| Fe1-SG                | 2.303        | 2.120     | 0.370 | 0.610 | 2.246 | 0.246                 | 2.149     | 0.370 | 0.660 | 2.429 | -0.571 |
| Fe2-S1                | 2.470        | 2.120     | 0.370 | 0.388 |       |                       | 2.149     | 0.370 | 0.420 |       |        |
| Fe2-S2A               | 2.287        | 2.120     | 0.370 | 0.637 |       |                       | 2.149     | 0.370 | 0.689 |       |        |
| Fe2-S4A               | 2.299        | 2.120     | 0.370 | 0.616 |       |                       | 2.149     | 0.370 | 0.667 |       |        |
| Fe2-SG                | 2.350        | 2.120     | 0.370 | 0.537 | 2.179 | 0.179                 | 2.149     | 0.370 | 0.581 | 2.356 | -0.644 |
| Fe3-S2A               | 2.325        | 2.120     | 0.370 | 0.575 |       |                       | 2.149     | 0.370 | 0.621 |       |        |
| Fe3-S3A               | 2.318        | 2.120     | 0.370 | 0.586 |       |                       | 2.149     | 0.370 | 0.633 |       |        |
| Fe3-S4A               | 2.288        | 2.120     | 0.370 | 0.635 |       |                       | 2.149     | 0.370 | 0.687 |       |        |
| Fe3-SG                | 2.288        | 2.120     | 0.370 | 0.635 | 2.430 | 0.430                 | 2.149     | 0.370 | 0.687 | 2.628 | -0.372 |
| Fe4-S1                | 2.401        | 2.120     | 0.370 | 0.468 |       |                       | 2.149     | 0.370 | 0.506 |       |        |
| Fe4-S3A               | 2.257        | 2.120     | 0.370 | 0.691 |       |                       | 2.149     | 0.370 | 0.747 |       |        |
| Fe4-S4A               | 2.254        | 2.120     | 0.370 | 0.696 |       |                       | 2.149     | 0.370 | 0.753 |       |        |

|         |       |       |       |       |        |        |       |       |       |        |        |
|---------|-------|-------|-------|-------|--------|--------|-------|-------|-------|--------|--------|
| Fe4-SG  | 2.331 | 2.120 | 0.370 | 0.565 | 2.420  | 0.420  | 2.149 | 0.370 | 0.611 | 2.617  | -0.383 |
| Fe5-S1  | 2.485 | 2.120 | 0.370 | 0.373 |        |        | 2.149 | 0.370 | 0.403 |        |        |
| Fe5-S2B | 2.348 | 2.120 | 0.370 | 0.540 |        |        | 2.149 | 0.370 | 0.584 |        |        |
| Fe5-S4B | 2.253 | 2.120 | 0.370 | 0.698 |        |        | 2.149 | 0.370 | 0.755 |        |        |
| Fe5-SG  | 2.340 | 2.120 | 0.370 | 0.552 | 2.163  | 0.163  | 2.149 | 0.370 | 0.597 | 2.339  | -0.661 |
| Fe6-S1  | 2.484 | 2.120 | 0.370 | 0.374 |        |        | 2.149 | 0.370 | 0.404 |        |        |
| Fe6-S2B | 2.408 | 2.120 | 0.370 | 0.459 |        |        | 2.149 | 0.370 | 0.497 |        |        |
| Fe6-S3B | 2.340 | 2.120 | 0.370 | 0.552 |        |        | 2.149 | 0.370 | 0.597 |        |        |
| Fe6-SG  | 2.308 | 2.120 | 0.370 | 0.602 | 1.986  | -0.014 | 2.149 | 0.370 | 0.651 | 2.148  | -0.852 |
| Fe7-S2B | 2.319 | 2.120 | 0.370 | 0.584 |        |        | 2.149 | 0.370 | 0.632 |        |        |
| Fe7-S3B | 2.342 | 2.120 | 0.370 | 0.549 |        |        | 2.149 | 0.370 | 0.594 |        |        |
| Fe7-S4B | 2.336 | 2.120 | 0.370 | 0.558 |        |        | 2.149 | 0.370 | 0.603 |        |        |
| Fe7-SG  | 2.253 | 2.120 | 0.370 | 0.698 | 2.389  | 0.389  | 2.149 | 0.370 | 0.755 | 2.583  | -0.417 |
| Fe8-S1  | 2.398 | 2.120 | 0.370 | 0.472 |        |        | 2.149 | 0.370 | 0.510 |        |        |
| Fe8-S3B | 2.297 | 2.120 | 0.370 | 0.620 |        |        | 2.149 | 0.370 | 0.670 |        |        |
| Fe8-S4B | 2.313 | 2.120 | 0.370 | 0.594 |        |        | 2.149 | 0.370 | 0.642 |        |        |
| Fe8-SG  | 2.346 | 2.120 | 0.370 | 0.543 | 2.228  | 0.228  | 2.149 | 0.370 | 0.587 | 2.410  | -0.590 |
|         |       |       |       |       | 18.041 |        |       |       |       | 19.511 |        |

**Table S74** The adopted bond valence analyses for irons in P-cluster [2] from MoFe protein 5VQ3 which is reported as P<sup>N</sup> at 1.72 Å resolution.

| Bond                  | $r_{ij}$ (Å) | $R_0$ (Å) | B (Å) | Bval  | Sum   | Diff.                 | $R_0$ (Å) | B (Å) | Bval  | Sum   | Diff.  |
|-----------------------|--------------|-----------|-------|-------|-------|-----------------------|-----------|-------|-------|-------|--------|
| expected valence = +2 |              |           |       |       |       | expected valence = +3 |           |       |       |       |        |
| Fe1-S1                | 2.415        | 2.120     | 0.370 | 0.451 |       |                       | 2.149     | 0.370 | 0.487 |       |        |
| Fe1-S2A               | 2.330        | 2.120     | 0.370 | 0.567 |       |                       | 2.149     | 0.370 | 0.613 |       |        |
| Fe1-S3A               | 2.310        | 2.120     | 0.370 | 0.598 |       |                       | 2.149     | 0.370 | 0.647 |       |        |
| Fe1-SG                | 2.336        | 2.120     | 0.370 | 0.558 | 2.174 | 0.174                 | 2.149     | 0.370 | 0.603 | 2.351 | -0.649 |
| Fe2-S1                | 2.479        | 2.120     | 0.370 | 0.379 |       |                       | 2.149     | 0.370 | 0.410 |       |        |
| Fe2-S2A               | 2.278        | 2.120     | 0.370 | 0.652 |       |                       | 2.149     | 0.370 | 0.706 |       |        |
| Fe2-S4A               | 2.316        | 2.120     | 0.370 | 0.589 |       |                       | 2.149     | 0.370 | 0.637 |       |        |
| Fe2-SG                | 2.322        | 2.120     | 0.370 | 0.579 | 2.199 | 0.199                 | 2.149     | 0.370 | 0.627 | 2.379 | -0.621 |
| Fe3-S2A               | 2.313        | 2.120     | 0.370 | 0.594 |       |                       | 2.149     | 0.370 | 0.642 |       |        |
| Fe3-S3A               | 2.317        | 2.120     | 0.370 | 0.587 |       |                       | 2.149     | 0.370 | 0.635 |       |        |
| Fe3-S4A               | 2.268        | 2.120     | 0.370 | 0.670 |       |                       | 2.149     | 0.370 | 0.725 |       |        |
| Fe3-SG                | 2.305        | 2.120     | 0.370 | 0.607 | 2.458 | 0.458                 | 2.149     | 0.370 | 0.656 | 2.658 | -0.342 |
| Fe4-S1                | 2.381        | 2.120     | 0.370 | 0.494 |       |                       | 2.149     | 0.370 | 0.534 |       |        |
| Fe4-S3A               | 2.299        | 2.120     | 0.370 | 0.616 |       |                       | 2.149     | 0.370 | 0.667 |       |        |
| Fe4-S4A               | 2.294        | 2.120     | 0.370 | 0.625 |       |                       | 2.149     | 0.370 | 0.676 |       |        |

|         |       |       |       |       |        |       |       |       |       |        |        |
|---------|-------|-------|-------|-------|--------|-------|-------|-------|-------|--------|--------|
| Fe4-SG  | 2.332 | 2.120 | 0.370 | 0.564 | 2.299  | 0.299 | 2.149 | 0.370 | 0.610 | 2.486  | -0.514 |
| Fe5-S1  | 2.483 | 2.120 | 0.370 | 0.375 |        |       | 2.149 | 0.370 | 0.405 |        |        |
| Fe5-S2B | 2.312 | 2.120 | 0.370 | 0.595 |        |       | 2.149 | 0.370 | 0.644 |        |        |
| Fe5-S4B | 2.288 | 2.120 | 0.370 | 0.635 |        |       | 2.149 | 0.370 | 0.687 |        |        |
| Fe5-SG  | 2.348 | 2.120 | 0.370 | 0.540 | 2.145  | 0.145 | 2.149 | 0.370 | 0.584 | 2.320  | -0.680 |
| Fe6-S1  | 2.477 | 2.120 | 0.370 | 0.381 |        |       | 2.149 | 0.370 | 0.412 |        |        |
| Fe6-S2B | 2.411 | 2.120 | 0.370 | 0.455 |        |       | 2.149 | 0.370 | 0.493 |        |        |
| Fe6-S3B | 2.297 | 2.120 | 0.370 | 0.620 |        |       | 2.149 | 0.370 | 0.670 |        |        |
| Fe6-SG  | 2.278 | 2.120 | 0.370 | 0.652 | 2.109  | 0.109 | 2.149 | 0.370 | 0.706 | 2.281  | -0.719 |
| Fe7-S2B | 2.326 | 2.120 | 0.370 | 0.573 |        |       | 2.149 | 0.370 | 0.620 |        |        |
| Fe7-S3B | 2.306 | 2.120 | 0.370 | 0.605 |        |       | 2.149 | 0.370 | 0.654 |        |        |
| Fe7-S4B | 2.298 | 2.120 | 0.370 | 0.618 |        |       | 2.149 | 0.370 | 0.669 |        |        |
| Fe7-SG  | 2.323 | 2.120 | 0.370 | 0.578 | 2.374  | 0.374 | 2.149 | 0.370 | 0.625 | 2.567  | -0.433 |
| Fe8-S1  | 2.387 | 2.120 | 0.370 | 0.486 |        |       | 2.149 | 0.370 | 0.526 |        |        |
| Fe8-S3B | 2.271 | 2.120 | 0.370 | 0.665 |        |       | 2.149 | 0.370 | 0.719 |        |        |
| Fe8-S4B | 2.315 | 2.120 | 0.370 | 0.590 |        |       | 2.149 | 0.370 | 0.638 |        |        |
| Fe8-SG  | 2.287 | 2.120 | 0.370 | 0.637 | 2.378  | 0.378 | 2.149 | 0.370 | 0.689 | 2.572  | -0.428 |
|         |       |       |       |       | 18.135 |       |       |       |       | 19.614 |        |

**Table S75** The adopted bond valence analyses for irons in P-cluster [1] from MoFe protein 5VQ4 whose conformation resemble P<sup>N</sup> at 2.3 Å resolution.

| Bond                  | $r_{ij}$ (Å) | $R_0$ (Å) | B (Å) | Bval  | Sum   | Diff.                 | $R_0$ (Å) | B (Å) | Bval  | Sum   | Diff.  |
|-----------------------|--------------|-----------|-------|-------|-------|-----------------------|-----------|-------|-------|-------|--------|
| expected valence = +2 |              |           |       |       |       | expected valence = +3 |           |       |       |       |        |
| Fe1-S1                | 2.449        | 2.120     | 0.370 | 0.411 |       |                       | 2.149     | 0.370 | 0.444 |       |        |
| Fe1-S2A               | 2.329        | 2.120     | 0.370 | 0.568 |       |                       | 2.149     | 0.370 | 0.615 |       |        |
| Fe1-S3A               | 2.308        | 2.120     | 0.370 | 0.602 |       |                       | 2.149     | 0.370 | 0.651 |       |        |
| Fe1-SG                | 2.287        | 2.120     | 0.370 | 0.637 | 2.218 | 0.218                 | 2.149     | 0.370 | 0.689 | 2.399 | -0.601 |
| Fe2-S1                | 2.506        | 2.120     | 0.370 | 0.352 |       |                       | 2.149     | 0.370 | 0.381 |       |        |
| Fe2-S2A               | 2.288        | 2.120     | 0.370 | 0.635 |       |                       | 2.149     | 0.370 | 0.687 |       |        |
| Fe2-S4A               | 2.287        | 2.120     | 0.370 | 0.637 |       |                       | 2.149     | 0.370 | 0.689 |       |        |
| Fe2-SG                | 2.272        | 2.120     | 0.370 | 0.663 | 2.287 | 0.287                 | 2.149     | 0.370 | 0.717 | 2.474 | -0.526 |
| Fe3-S2A               | 2.281        | 2.120     | 0.370 | 0.647 |       |                       | 2.149     | 0.370 | 0.700 |       |        |
| Fe3-S3A               | 2.311        | 2.120     | 0.370 | 0.597 |       |                       | 2.149     | 0.370 | 0.645 |       |        |
| Fe3-S4A               | 2.272        | 2.120     | 0.370 | 0.663 |       |                       | 2.149     | 0.370 | 0.717 |       |        |
| Fe3-SG                | 2.232        | 2.120     | 0.370 | 0.739 | 2.646 | 0.646                 | 2.149     | 0.370 | 0.799 | 2.862 | -0.138 |
| Fe4-S1                | 2.374        | 2.120     | 0.370 | 0.503 |       |                       | 2.149     | 0.370 | 0.544 |       |        |
| Fe4-S3A               | 2.314        | 2.120     | 0.370 | 0.592 |       |                       | 2.149     | 0.370 | 0.640 |       |        |
| Fe4-S4A               | 2.315        | 2.120     | 0.370 | 0.590 |       |                       | 2.149     | 0.370 | 0.638 |       |        |

|         |       |       |       |       |        |        |       |       |       |        |        |
|---------|-------|-------|-------|-------|--------|--------|-------|-------|-------|--------|--------|
| Fe4-SG  | 2.199 | 2.120 | 0.370 | 0.808 | 2.493  | 0.493  | 2.149 | 0.370 | 0.874 | 2.697  | -0.303 |
| Fe5-S1  | 2.738 | 2.120 | 0.370 | 0.188 |        |        | 2.149 | 0.370 | 0.204 |        |        |
| Fe5-S2B | 2.355 | 2.120 | 0.370 | 0.530 |        |        | 2.149 | 0.370 | 0.573 |        |        |
| Fe5-S4B | 2.238 | 2.120 | 0.370 | 0.727 |        |        | 2.149 | 0.370 | 0.786 |        |        |
| Fe5-SG  | 2.312 | 2.120 | 0.370 | 0.595 | 2.040  | 0.040  | 2.149 | 0.370 | 0.644 | 2.206  | -0.794 |
| Fe6-S1  | 2.978 | 2.120 | 0.370 | 0.098 |        |        | 2.149 | 0.370 | 0.106 |        |        |
| Fe6-S2B | 2.419 | 2.120 | 0.370 | 0.446 |        |        | 2.149 | 0.370 | 0.482 |        |        |
| Fe6-S3B | 2.348 | 2.120 | 0.370 | 0.540 |        |        | 2.149 | 0.370 | 0.584 |        |        |
| Fe6-SG  | 2.278 | 2.120 | 0.370 | 0.652 | 1.737  | -0.263 | 2.149 | 0.370 | 0.706 | 1.878  | -1.122 |
| Fe7-S2B | 2.314 | 2.120 | 0.370 | 0.592 |        |        | 2.149 | 0.370 | 0.640 |        |        |
| Fe7-S3B | 2.297 | 2.120 | 0.370 | 0.620 |        |        | 2.149 | 0.370 | 0.670 |        |        |
| Fe7-S4B | 2.285 | 2.120 | 0.370 | 0.640 |        |        | 2.149 | 0.370 | 0.692 |        |        |
| Fe7-SG  | 2.306 | 2.120 | 0.370 | 0.605 | 2.457  | 0.457  | 2.149 | 0.370 | 0.654 | 2.657  | -0.343 |
| Fe8-S1  | 2.353 | 2.120 | 0.370 | 0.533 |        |        | 2.149 | 0.370 | 0.576 |        |        |
| Fe8-S3B | 2.281 | 2.120 | 0.370 | 0.647 |        |        | 2.149 | 0.370 | 0.700 |        |        |
| Fe8-S4B | 2.282 | 2.120 | 0.370 | 0.645 |        |        | 2.149 | 0.370 | 0.698 |        |        |
| Fe8-SG  | 2.198 | 2.120 | 0.370 | 0.810 | 2.635  | 0.635  | 2.149 | 0.370 | 0.876 | 2.850  | -0.150 |
|         |       |       |       |       | 18.513 |        |       |       |       | 20.023 |        |

**Table S76** The adopted bond valence analyses for irons in P-cluster [2] from MoFe protein 5VQ4 whose conformation resemble P<sup>N</sup> at 2.3 Å resolution.

| Bond                  | $r_{ij}$ (Å) | $R_0$ (Å) | B (Å) | Bval  | Sum   | Diff.                 | $R_0$ (Å) | B (Å) | Bval  | Sum   | Diff.  |
|-----------------------|--------------|-----------|-------|-------|-------|-----------------------|-----------|-------|-------|-------|--------|
| expected valence = +2 |              |           |       |       |       | expected valence = +3 |           |       |       |       |        |
| Fe1-S1                | 2.422        | 2.120     | 0.370 | 0.442 |       |                       | 2.149     | 0.370 | 0.478 |       |        |
| Fe1-S2A               | 2.335        | 2.120     | 0.370 | 0.559 |       |                       | 2.149     | 0.370 | 0.605 |       |        |
| Fe1-S3A               | 2.335        | 2.120     | 0.370 | 0.559 |       |                       | 2.149     | 0.370 | 0.605 |       |        |
| Fe1-SG                | 2.403        | 2.120     | 0.370 | 0.465 | 2.026 | 0.026                 | 2.149     | 0.370 | 0.503 | 2.191 | -0.809 |
| Fe2-S1                | 2.473        | 2.120     | 0.370 | 0.385 |       |                       | 2.149     | 0.370 | 0.417 |       |        |
| Fe2-S2A               | 2.296        | 2.120     | 0.370 | 0.621 |       |                       | 2.149     | 0.370 | 0.672 |       |        |
| Fe2-S4A               | 2.293        | 2.120     | 0.370 | 0.627 |       |                       | 2.149     | 0.370 | 0.678 |       |        |
| Fe2-SG                | 2.307        | 2.120     | 0.370 | 0.603 | 2.236 | 0.236                 | 2.149     | 0.370 | 0.652 | 2.419 | -0.581 |
| Fe3-S2A               | 2.338        | 2.120     | 0.370 | 0.555 |       |                       | 2.149     | 0.370 | 0.600 |       |        |
| Fe3-S3A               | 2.296        | 2.120     | 0.370 | 0.621 |       |                       | 2.149     | 0.370 | 0.672 |       |        |
| Fe3-S4A               | 2.243        | 2.120     | 0.370 | 0.717 |       |                       | 2.149     | 0.370 | 0.776 |       |        |
| Fe3-SG                | 2.277        | 2.120     | 0.370 | 0.654 | 2.548 | 0.548                 | 2.149     | 0.370 | 0.708 | 2.755 | -0.245 |
| Fe4-S1                | 2.400        | 2.120     | 0.370 | 0.469 |       |                       | 2.149     | 0.370 | 0.507 |       |        |
| Fe4-S3A               | 2.325        | 2.120     | 0.370 | 0.575 |       |                       | 2.149     | 0.370 | 0.621 |       |        |
| Fe4-S4A               | 2.280        | 2.120     | 0.370 | 0.649 |       |                       | 2.149     | 0.370 | 0.702 |       |        |



|         |       |       |       |       |        |        |       |       |       |        |        |
|---------|-------|-------|-------|-------|--------|--------|-------|-------|-------|--------|--------|
| Fe4-SG  | 2.207 | 2.120 | 0.370 | 0.790 | 2.483  | 0.483  | 2.149 | 0.370 | 0.855 | 2.686  | -0.314 |
| Fe5-S1  | 2.724 | 2.120 | 0.370 | 0.195 |        |        | 2.149 | 0.370 | 0.211 |        |        |
| Fe5-S2B | 2.375 | 2.120 | 0.370 | 0.502 |        |        | 2.149 | 0.370 | 0.543 |        |        |
| Fe5-S4B | 2.218 | 2.120 | 0.370 | 0.767 |        |        | 2.149 | 0.370 | 0.830 |        |        |
| Fe5-SG  | 2.325 | 2.120 | 0.370 | 0.575 | 2.039  | 0.039  | 2.149 | 0.370 | 0.621 | 2.206  | -0.794 |
| Fe6-S1  | 2.936 | 2.120 | 0.370 | 0.110 |        |        | 2.149 | 0.370 | 0.119 |        |        |
| Fe6-S2B | 2.439 | 2.120 | 0.370 | 0.422 |        |        | 2.149 | 0.370 | 0.457 |        |        |
| Fe6-S3B | 2.312 | 2.120 | 0.370 | 0.595 |        |        | 2.149 | 0.370 | 0.644 |        |        |
| Fe6-SG  | 2.304 | 2.120 | 0.370 | 0.608 | 1.736  | -0.264 | 2.149 | 0.370 | 0.658 | 1.877  | -1.123 |
| Fe7-S2B | 2.311 | 2.120 | 0.370 | 0.597 |        |        | 2.149 | 0.370 | 0.645 |        |        |
| Fe7-S3B | 2.336 | 2.120 | 0.370 | 0.558 |        |        | 2.149 | 0.370 | 0.603 |        |        |
| Fe7-S4B | 2.290 | 2.120 | 0.370 | 0.632 |        |        | 2.149 | 0.370 | 0.683 |        |        |
| Fe7-SG  | 2.515 | 2.120 | 0.370 | 0.344 | 2.130  | 0.130  | 2.149 | 0.370 | 0.372 | 2.304  | -0.696 |
| Fe8-S1  | 2.360 | 2.120 | 0.370 | 0.523 |        |        | 2.149 | 0.370 | 0.565 |        |        |
| Fe8-S3B | 2.273 | 2.120 | 0.370 | 0.661 |        |        | 2.149 | 0.370 | 0.715 |        |        |
| Fe8-S4B | 2.323 | 2.120 | 0.370 | 0.578 |        |        | 2.149 | 0.370 | 0.625 |        |        |
| Fe8-SG  | 2.359 | 2.120 | 0.370 | 0.524 | 2.286  | 0.286  | 2.149 | 0.370 | 0.567 | 2.472  | -0.528 |
|         |       |       |       |       | 17.484 |        |       |       |       | 18.910 |        |

**Table S77** The adopted bond valence analyses for irons in P-cluster [1] from MoFe protein 6O7L whose conformations resemble P<sup>N</sup> at 2.26 Å resolution.

| Bond                  | $r_{ij}$ (Å) | $R_0$ (Å) | B (Å) | Bval  | Sum   | Diff.                 | $R_0$ (Å) | B (Å) | Bval  | Sum   | Diff.  |
|-----------------------|--------------|-----------|-------|-------|-------|-----------------------|-----------|-------|-------|-------|--------|
| expected valence = +2 |              |           |       |       |       | expected valence = +3 |           |       |       |       |        |
| Fe1-S1                | 2.453        | 2.120     | 0.370 | 0.407 |       |                       | 2.149     | 0.370 | 0.440 |       |        |
| Fe1-S2A               | 2.229        | 2.120     | 0.370 | 0.745 |       |                       | 2.149     | 0.370 | 0.806 |       |        |
| Fe1-S3A               | 2.222        | 2.120     | 0.370 | 0.759 |       |                       | 2.149     | 0.370 | 0.821 |       |        |
| Fe1-SG                | 2.503        | 2.120     | 0.370 | 0.355 | 2.266 | 0.266                 | 2.149     | 0.370 | 0.384 | 2.450 | -0.550 |
| Fe2-S1                | 2.395        | 2.120     | 0.370 | 0.476 |       |                       | 2.149     | 0.370 | 0.514 |       |        |
| Fe2-S2A               | 2.244        | 2.120     | 0.370 | 0.715 |       |                       | 2.149     | 0.370 | 0.774 |       |        |
| Fe2-S4A               | 2.223        | 2.120     | 0.370 | 0.757 |       |                       | 2.149     | 0.370 | 0.819 |       |        |
| Fe2-SG                | 2.421        | 2.120     | 0.370 | 0.443 | 2.391 | 0.391                 | 2.149     | 0.370 | 0.479 | 2.586 | -0.414 |
| Fe3-S2A               | 2.225        | 2.120     | 0.370 | 0.753 |       |                       | 2.149     | 0.370 | 0.814 |       |        |
| Fe3-S3A               | 2.217        | 2.120     | 0.370 | 0.769 |       |                       | 2.149     | 0.370 | 0.832 |       |        |
| Fe3-S4A               | 2.290        | 2.120     | 0.370 | 0.632 |       |                       | 2.149     | 0.370 | 0.683 |       |        |
| Fe3-SG                | 2.296        | 2.120     | 0.370 | 0.621 | 2.775 | 0.775                 | 2.149     | 0.370 | 0.672 | 3.002 | 0.002  |
| Fe4-S1                | 2.297        | 2.120     | 0.370 | 0.620 |       |                       | 2.149     | 0.370 | 0.670 |       |        |
| Fe4-S3A               | 2.229        | 2.120     | 0.370 | 0.745 |       |                       | 2.149     | 0.370 | 0.806 |       |        |
| Fe4-S4A               | 2.246        | 2.120     | 0.370 | 0.711 |       |                       | 2.149     | 0.370 | 0.769 |       |        |

|         |       |       |       |       |        |        |       |       |       |        |        |
|---------|-------|-------|-------|-------|--------|--------|-------|-------|-------|--------|--------|
| Fe4-SG  | 2.414 | 2.120 | 0.370 | 0.452 | 2.528  | 0.528  | 2.149 | 0.370 | 0.489 | 2.734  | -0.266 |
| Fe5-S1  | 2.480 | 2.120 | 0.370 | 0.378 |        |        | 2.149 | 0.370 | 0.409 |        |        |
| Fe5-S2B | 2.007 | 2.120 | 0.370 | 1.357 |        |        | 2.149 | 0.370 | 1.468 |        |        |
| Fe5-S4B | 2.238 | 2.120 | 0.370 | 0.727 |        |        | 2.149 | 0.370 | 0.786 |        |        |
| Fe5-SG  | 2.366 | 2.120 | 0.370 | 0.514 | 2.976  | 0.976  | 2.149 | 0.370 | 0.556 | 3.219  | 0.219  |
| Fe6-S1  | 2.849 | 2.120 | 0.370 | 0.139 |        |        | 2.149 | 0.370 | 0.151 |        |        |
| Fe6-S2B | 2.245 | 2.120 | 0.370 | 0.713 |        |        | 2.149 | 0.370 | 0.771 |        |        |
| Fe6-S3B | 2.292 | 2.120 | 0.370 | 0.628 |        |        | 2.149 | 0.370 | 0.679 |        |        |
| Fe6-SG  | 2.253 | 2.120 | 0.370 | 0.698 | 2.179  | 0.179  | 2.149 | 0.370 | 0.755 | 2.357  | -0.643 |
| Fe7-S2B | 2.572 | 2.120 | 0.370 | 0.295 |        |        | 2.149 | 0.370 | 0.319 |        |        |
| Fe7-S3B | 2.533 | 2.120 | 0.370 | 0.328 |        |        | 2.149 | 0.370 | 0.354 |        |        |
| Fe7-S4B | 2.494 | 2.120 | 0.370 | 0.364 |        |        | 2.149 | 0.370 | 0.394 |        |        |
| Fe7-SG  | 2.256 | 2.120 | 0.370 | 0.692 | 1.679  | -0.321 | 2.149 | 0.370 | 0.749 | 1.815  | -1.185 |
| Fe8-S1  | 2.251 | 2.120 | 0.370 | 0.702 |        |        | 2.149 | 0.370 | 0.759 |        |        |
| Fe8-S3B | 2.132 | 2.120 | 0.370 | 0.968 |        |        | 2.149 | 0.370 | 1.047 |        |        |
| Fe8-S4B | 2.321 | 2.120 | 0.370 | 0.581 |        |        | 2.149 | 0.370 | 0.628 |        |        |
| Fe8-SG  | 2.486 | 2.120 | 0.370 | 0.372 | 2.623  | 0.623  | 2.149 | 0.370 | 0.402 | 2.836  | -0.164 |
|         |       |       |       |       | 19.417 |        |       |       |       | 21.000 |        |

**Table S78** The adopted bond valence analyses for irons in P-cluster [2] from MoFe protein 6O7L whose conformations resemble P<sup>N</sup> at 2.26 Å resolution.

| Bond                  | $r_{ij}$ (Å) | $R_0$ (Å) | B (Å) | Bval  | Sum   | Diff.                 | $R_0$ (Å) | B (Å) | Bval  | Sum   | Diff.  |
|-----------------------|--------------|-----------|-------|-------|-------|-----------------------|-----------|-------|-------|-------|--------|
| expected valence = +2 |              |           |       |       |       | expected valence = +3 |           |       |       |       |        |
| Fe1-S1                | 2.484        | 2.120     | 0.370 | 0.374 |       |                       | 2.149     | 0.370 | 0.404 |       |        |
| Fe1-S2A               | 2.268        | 2.120     | 0.370 | 0.670 |       |                       | 2.149     | 0.370 | 0.725 |       |        |
| Fe1-S3A               | 2.259        | 2.120     | 0.370 | 0.687 |       |                       | 2.149     | 0.370 | 0.743 |       |        |
| Fe1-SG                | 2.439        | 2.120     | 0.370 | 0.422 | 2.153 | 0.153                 | 2.149     | 0.370 | 0.457 | 2.329 | -0.671 |
| Fe2-S1                | 2.406        | 2.120     | 0.370 | 0.462 |       |                       | 2.149     | 0.370 | 0.499 |       |        |
| Fe2-S2A               | 2.272        | 2.120     | 0.370 | 0.663 |       |                       | 2.149     | 0.370 | 0.717 |       |        |
| Fe2-S4A               | 2.292        | 2.120     | 0.370 | 0.628 |       |                       | 2.149     | 0.370 | 0.679 |       |        |
| Fe2-SG                | 2.461        | 2.120     | 0.370 | 0.398 | 2.151 | 0.151                 | 2.149     | 0.370 | 0.430 | 2.326 | -0.674 |
| Fe3-S2A               | 2.273        | 2.120     | 0.370 | 0.661 |       |                       | 2.149     | 0.370 | 0.715 |       |        |
| Fe3-S3A               | 2.245        | 2.120     | 0.370 | 0.713 |       |                       | 2.149     | 0.370 | 0.771 |       |        |
| Fe3-S4A               | 2.287        | 2.120     | 0.370 | 0.637 |       |                       | 2.149     | 0.370 | 0.689 |       |        |
| Fe3-SG                | 2.201        | 2.120     | 0.370 | 0.803 | 2.815 | 0.815                 | 2.149     | 0.370 | 0.869 | 3.044 | 0.044  |
| Fe4-S1                | 2.348        | 2.120     | 0.370 | 0.540 |       |                       | 2.149     | 0.370 | 0.584 |       |        |
| Fe4-S3A               | 2.273        | 2.120     | 0.370 | 0.661 |       |                       | 2.149     | 0.370 | 0.715 |       |        |
| Fe4-S4A               | 2.278        | 2.120     | 0.370 | 0.652 |       |                       | 2.149     | 0.370 | 0.706 |       |        |

|         |       |       |       |       |        |        |       |       |       |        |        |
|---------|-------|-------|-------|-------|--------|--------|-------|-------|-------|--------|--------|
| Fe4-SG  | 2.348 | 2.120 | 0.370 | 0.540 | 2.394  | 0.394  | 2.149 | 0.370 | 0.584 | 2.589  | -0.411 |
| Fe5-S1  | 2.623 | 2.120 | 0.370 | 0.257 |        |        | 2.149 | 0.370 | 0.278 |        |        |
| Fe5-S2B | 2.126 | 2.120 | 0.370 | 0.984 |        |        | 2.149 | 0.370 | 1.064 |        |        |
| Fe5-S4B | 2.334 | 2.120 | 0.370 | 0.561 |        |        | 2.149 | 0.370 | 0.607 |        |        |
| Fe5-SG  | 2.355 | 2.120 | 0.370 | 0.530 | 2.331  | 0.331  | 2.149 | 0.370 | 0.573 | 2.521  | -0.479 |
| Fe6-S1  | 2.513 | 2.120 | 0.370 | 0.346 |        |        | 2.149 | 0.370 | 0.374 |        |        |
| Fe6-S2B | 2.322 | 2.120 | 0.370 | 0.579 |        |        | 2.149 | 0.370 | 0.627 |        |        |
| Fe6-S3B | 2.162 | 2.120 | 0.370 | 0.893 |        |        | 2.149 | 0.370 | 0.965 |        |        |
| Fe6-SG  | 2.446 | 2.120 | 0.370 | 0.414 | 2.232  | 0.232  | 2.149 | 0.370 | 0.448 | 2.414  | -0.586 |
| Fe7-S2B | 2.460 | 2.120 | 0.370 | 0.399 |        |        | 2.149 | 0.370 | 0.431 |        |        |
| Fe7-S3B | 2.460 | 2.120 | 0.370 | 0.399 |        |        | 2.149 | 0.370 | 0.431 |        |        |
| Fe7-S4B | 2.312 | 2.120 | 0.370 | 0.595 |        |        | 2.149 | 0.370 | 0.644 |        |        |
| Fe7-SG  | 2.407 | 2.120 | 0.370 | 0.460 | 1.853  | -0.147 | 2.149 | 0.370 | 0.498 | 2.005  | -0.995 |
| Fe8-S1  | 2.448 | 2.120 | 0.370 | 0.412 |        |        | 2.149 | 0.370 | 0.446 |        |        |
| Fe8-S3B | 2.237 | 2.120 | 0.370 | 0.729 |        |        | 2.149 | 0.370 | 0.788 |        |        |
| Fe8-S4B | 2.291 | 2.120 | 0.370 | 0.630 |        |        | 2.149 | 0.370 | 0.681 |        |        |
| Fe8-SG  | 2.402 | 2.120 | 0.370 | 0.467 | 2.238  | 0.238  | 2.149 | 0.370 | 0.505 | 2.420  | -0.580 |
|         |       |       |       |       | 18.167 |        |       |       |       | 19.648 |        |

**Table S79** The adopted bond valence analyses for irons in P-cluster [1] from MoFe protein 6O7O which is reported as P<sup>N</sup> at 1.89sÅ resolution.

| Bond                  | $r_{ij}$ (Å) | $R_0$ (Å) | B (Å) | Bval  | Sum   | Diff.                 | $R_0$ (Å) | B (Å) | Bval  | Sum   | Diff.  |
|-----------------------|--------------|-----------|-------|-------|-------|-----------------------|-----------|-------|-------|-------|--------|
| expected valence = +2 |              |           |       |       |       | expected valence = +3 |           |       |       |       |        |
| Fe1-S1                | 2.446        | 2.120     | 0.370 | 0.414 |       |                       | 2.149     | 0.370 | 0.448 |       |        |
| Fe1-S2A               | 2.282        | 2.120     | 0.370 | 0.645 |       |                       | 2.149     | 0.370 | 0.698 |       |        |
| Fe1-S3A               | 2.238        | 2.120     | 0.370 | 0.727 |       |                       | 2.149     | 0.370 | 0.786 |       |        |
| Fe1-SG                | 2.331        | 2.120     | 0.370 | 0.565 | 2.352 | 0.352                 | 2.149     | 0.370 | 0.611 | 2.544 | -0.456 |
| Fe2-S1                | 2.430        | 2.120     | 0.370 | 0.433 |       |                       | 2.149     | 0.370 | 0.468 |       |        |
| Fe2-S2A               | 2.270        | 2.120     | 0.370 | 0.667 |       |                       | 2.149     | 0.370 | 0.721 |       |        |
| Fe2-S4A               | 2.301        | 2.120     | 0.370 | 0.613 |       |                       | 2.149     | 0.370 | 0.663 |       |        |
| Fe2-SG                | 2.357        | 2.120     | 0.370 | 0.527 | 2.239 | 0.239                 | 2.149     | 0.370 | 0.570 | 2.422 | -0.578 |
| Fe3-S2A               | 2.301        | 2.120     | 0.370 | 0.613 |       |                       | 2.149     | 0.370 | 0.663 |       |        |
| Fe3-S3A               | 2.284        | 2.120     | 0.370 | 0.642 |       |                       | 2.149     | 0.370 | 0.694 |       |        |
| Fe3-S4A               | 2.348        | 2.120     | 0.370 | 0.540 |       |                       | 2.149     | 0.370 | 0.584 |       |        |
| Fe3-SG                | 2.334        | 2.120     | 0.370 | 0.561 | 2.356 | 0.356                 | 2.149     | 0.370 | 0.607 | 2.548 | -0.452 |
| Fe4-S1                | 2.334        | 2.120     | 0.370 | 0.561 |       |                       | 2.149     | 0.370 | 0.607 |       |        |
| Fe4-S3A               | 2.255        | 2.120     | 0.370 | 0.694 |       |                       | 2.149     | 0.370 | 0.751 |       |        |
| Fe4-S4A               | 2.307        | 2.120     | 0.370 | 0.603 |       |                       | 2.149     | 0.370 | 0.652 |       |        |

|         |       |       |       |       |        |       |       |       |       |        |        |
|---------|-------|-------|-------|-------|--------|-------|-------|-------|-------|--------|--------|
| Fe4-SG  | 2.336 | 2.120 | 0.370 | 0.558 | 2.416  | 0.416 | 2.149 | 0.370 | 0.603 | 2.613  | -0.387 |
| Fe5-S1  | 2.399 | 2.120 | 0.370 | 0.470 |        |       | 2.149 | 0.370 | 0.509 |        |        |
| Fe5-S2B | 2.237 | 2.120 | 0.370 | 0.729 |        |       | 2.149 | 0.370 | 0.788 |        |        |
| Fe5-S4B | 2.291 | 2.120 | 0.370 | 0.630 |        |       | 2.149 | 0.370 | 0.681 |        |        |
| Fe5-SG  | 2.345 | 2.120 | 0.370 | 0.544 | 2.374  | 0.374 | 2.149 | 0.370 | 0.589 | 2.567  | -0.433 |
| Fe6-S1  | 2.533 | 2.120 | 0.370 | 0.328 |        |       | 2.149 | 0.370 | 0.354 |        |        |
| Fe6-S2B | 2.275 | 2.120 | 0.370 | 0.658 |        |       | 2.149 | 0.370 | 0.711 |        |        |
| Fe6-S3B | 2.332 | 2.120 | 0.370 | 0.564 |        |       | 2.149 | 0.370 | 0.610 |        |        |
| Fe6-SG  | 2.279 | 2.120 | 0.370 | 0.651 | 2.200  | 0.200 | 2.149 | 0.370 | 0.704 | 2.379  | -0.621 |
| Fe7-S2B | 2.214 | 2.120 | 0.370 | 0.776 |        |       | 2.149 | 0.370 | 0.839 |        |        |
| Fe7-S3B | 2.330 | 2.120 | 0.370 | 0.567 |        |       | 2.149 | 0.370 | 0.613 |        |        |
| Fe7-S4B | 2.306 | 2.120 | 0.370 | 0.605 |        |       | 2.149 | 0.370 | 0.654 |        |        |
| Fe7-SG  | 2.370 | 2.120 | 0.370 | 0.509 | 2.456  | 0.456 | 2.149 | 0.370 | 0.550 | 2.657  | -0.343 |
| Fe8-S1  | 2.397 | 2.120 | 0.370 | 0.473 |        |       | 2.149 | 0.370 | 0.512 |        |        |
| Fe8-S3B | 2.294 | 2.120 | 0.370 | 0.625 |        |       | 2.149 | 0.370 | 0.676 |        |        |
| Fe8-S4B | 2.335 | 2.120 | 0.370 | 0.559 |        |       | 2.149 | 0.370 | 0.605 |        |        |
| Fe8-SG  | 2.336 | 2.120 | 0.370 | 0.558 | 2.215  | 0.215 | 2.149 | 0.370 | 0.603 | 2.396  | -0.604 |
|         |       |       |       |       | 18.608 |       |       |       |       | 20.125 |        |

**Table S80** The adopted bond valence analyses for irons in P-cluster [2] from MoFe protein 6O7O which is reported as P<sup>N</sup> at 1.89 Å resolution.

| Bond                  | $r_{ij}$ (Å) | $R_0$ (Å) | B (Å) | Bval  | Sum   | Diff.                 | $R_0$ (Å) | B (Å) | Bval  | Sum   | Diff.  |
|-----------------------|--------------|-----------|-------|-------|-------|-----------------------|-----------|-------|-------|-------|--------|
| expected valence = +2 |              |           |       |       |       | expected valence = +3 |           |       |       |       |        |
| Fe1-S1                | 2.431        | 2.120     | 0.370 | 0.431 |       |                       | 2.149     | 0.370 | 0.467 |       |        |
| Fe1-S2A               | 2.241        | 2.120     | 0.370 | 0.721 |       |                       | 2.149     | 0.370 | 0.780 |       |        |
| Fe1-S3A               | 2.260        | 2.120     | 0.370 | 0.685 |       |                       | 2.149     | 0.370 | 0.741 |       |        |
| Fe1-SG                | 2.393        | 2.120     | 0.370 | 0.478 | 2.316 | 0.316                 | 2.149     | 0.370 | 0.517 | 2.504 | -0.496 |
| Fe2-S1                | 2.421        | 2.120     | 0.370 | 0.443 |       |                       | 2.149     | 0.370 | 0.479 |       |        |
| Fe2-S2A               | 2.254        | 2.120     | 0.370 | 0.696 |       |                       | 2.149     | 0.370 | 0.753 |       |        |
| Fe2-S4A               | 2.272        | 2.120     | 0.370 | 0.663 |       |                       | 2.149     | 0.370 | 0.717 |       |        |
| Fe2-SG                | 2.327        | 2.120     | 0.370 | 0.572 | 2.374 | 0.374                 | 2.149     | 0.370 | 0.618 | 2.568 | -0.432 |
| Fe3-S2A               | 2.302        | 2.120     | 0.370 | 0.611 |       |                       | 2.149     | 0.370 | 0.661 |       |        |
| Fe3-S3A               | 2.257        | 2.120     | 0.370 | 0.691 |       |                       | 2.149     | 0.370 | 0.747 |       |        |
| Fe3-S4A               | 2.309        | 2.120     | 0.370 | 0.600 |       |                       | 2.149     | 0.370 | 0.649 |       |        |
| Fe3-SG                | 2.248        | 2.120     | 0.370 | 0.708 | 2.610 | 0.610                 | 2.149     | 0.370 | 0.765 | 2.822 | -0.178 |
| Fe4-S1                | 2.329        | 2.120     | 0.370 | 0.568 |       |                       | 2.149     | 0.370 | 0.615 |       |        |
| Fe4-S3A               | 2.260        | 2.120     | 0.370 | 0.685 |       |                       | 2.149     | 0.370 | 0.741 |       |        |
| Fe4-S4A               | 2.307        | 2.120     | 0.370 | 0.603 |       |                       | 2.149     | 0.370 | 0.652 |       |        |



|         |       |       |       |       |        |       |       |       |       |        |        |
|---------|-------|-------|-------|-------|--------|-------|-------|-------|-------|--------|--------|
| Fe4-SG  | 2.323 | 2.120 | 0.370 | 0.578 | 2.434  | 0.434 | 2.149 | 0.370 | 0.625 | 2.633  | -0.367 |
| Fe5-S1  | 2.417 | 2.120 | 0.370 | 0.448 |        |       | 2.149 | 0.370 | 0.485 |        |        |
| Fe5-S2B | 2.196 | 2.120 | 0.370 | 0.814 |        |       | 2.149 | 0.370 | 0.881 |        |        |
| Fe5-S4B | 2.313 | 2.120 | 0.370 | 0.594 |        |       | 2.149 | 0.370 | 0.642 |        |        |
| Fe5-SG  | 2.348 | 2.120 | 0.370 | 0.540 | 2.396  | 0.396 | 2.149 | 0.370 | 0.584 | 2.591  | -0.409 |
| Fe6-S1  | 2.486 | 2.120 | 0.370 | 0.372 |        |       | 2.149 | 0.370 | 0.402 |        |        |
| Fe6-S2B | 2.303 | 2.120 | 0.370 | 0.610 |        |       | 2.149 | 0.370 | 0.660 |        |        |
| Fe6-S3B | 2.295 | 2.120 | 0.370 | 0.623 |        |       | 2.149 | 0.370 | 0.674 |        |        |
| Fe6-SG  | 2.340 | 2.120 | 0.370 | 0.552 | 2.157  | 0.157 | 2.149 | 0.370 | 0.597 | 2.332  | -0.668 |
| Fe7-S2B | 2.226 | 2.120 | 0.370 | 0.751 |        |       | 2.149 | 0.370 | 0.812 |        |        |
| Fe7-S3B | 2.318 | 2.120 | 0.370 | 0.586 |        |       | 2.149 | 0.370 | 0.633 |        |        |
| Fe7-S4B | 2.299 | 2.120 | 0.370 | 0.616 |        |       | 2.149 | 0.370 | 0.667 |        |        |
| Fe7-SG  | 2.355 | 2.120 | 0.370 | 0.530 | 2.483  | 0.483 | 2.149 | 0.370 | 0.573 | 2.685  | -0.315 |
| Fe8-S1  | 2.418 | 2.120 | 0.370 | 0.447 |        |       | 2.149 | 0.370 | 0.483 |        |        |
| Fe8-S3B | 2.324 | 2.120 | 0.370 | 0.576 |        |       | 2.149 | 0.370 | 0.623 |        |        |
| Fe8-S4B | 2.336 | 2.120 | 0.370 | 0.558 |        |       | 2.149 | 0.370 | 0.603 |        |        |
| Fe8-SG  | 2.254 | 2.120 | 0.370 | 0.696 | 2.277  | 0.277 | 2.149 | 0.370 | 0.753 | 2.463  | -0.537 |
|         |       |       |       |       | 19.046 |       |       |       |       | 20.599 |        |

**Table S81** The adopted bond valence analyses for irons in P-cluster [1] from MoFe protein 6O7P which is reported as P<sup>N</sup> at 1.7 Å resolution.

| Bond                  | $r_{ij}$ (Å) | $R_0$ (Å) | B (Å) | Bval  | Sum   | Diff.                 | $R_0$ (Å) | B (Å) | Bval  | Sum   | Diff.  |
|-----------------------|--------------|-----------|-------|-------|-------|-----------------------|-----------|-------|-------|-------|--------|
| expected valence = +2 |              |           |       |       |       | expected valence = +3 |           |       |       |       |        |
| Fe1-S1                | 2.441        | 2.120     | 0.370 | 0.420 |       |                       | 2.149     | 0.370 | 0.454 |       |        |
| Fe1-S2A               | 2.271        | 2.120     | 0.370 | 0.665 |       |                       | 2.149     | 0.370 | 0.719 |       |        |
| Fe1-S3A               | 2.267        | 2.120     | 0.370 | 0.672 |       |                       | 2.149     | 0.370 | 0.727 |       |        |
| Fe1-SG                | 2.354        | 2.120     | 0.370 | 0.531 | 2.288 | 0.288                 | 2.149     | 0.370 | 0.575 | 2.475 | -0.525 |
| Fe2-S1                | 2.405        | 2.120     | 0.370 | 0.463 |       |                       | 2.149     | 0.370 | 0.501 |       |        |
| Fe2-S2A               | 2.266        | 2.120     | 0.370 | 0.674 |       |                       | 2.149     | 0.370 | 0.729 |       |        |
| Fe2-S4A               | 2.279        | 2.120     | 0.370 | 0.651 |       |                       | 2.149     | 0.370 | 0.704 |       |        |
| Fe2-SG                | 2.332        | 2.120     | 0.370 | 0.564 | 2.351 | 0.351                 | 2.149     | 0.370 | 0.610 | 2.543 | -0.457 |
| Fe3-S2A               | 2.274        | 2.120     | 0.370 | 0.660 |       |                       | 2.149     | 0.370 | 0.713 |       |        |
| Fe3-S3A               | 2.248        | 2.120     | 0.370 | 0.708 |       |                       | 2.149     | 0.370 | 0.765 |       |        |
| Fe3-S4A               | 2.303        | 2.120     | 0.370 | 0.610 |       |                       | 2.149     | 0.370 | 0.660 |       |        |
| Fe3-SG                | 2.249        | 2.120     | 0.370 | 0.706 | 2.683 | 0.683                 | 2.149     | 0.370 | 0.763 | 2.901 | -0.099 |
| Fe4-S1                | 2.373        | 2.120     | 0.370 | 0.505 |       |                       | 2.149     | 0.370 | 0.546 |       |        |
| Fe4-S3A               | 2.275        | 2.120     | 0.370 | 0.658 |       |                       | 2.149     | 0.370 | 0.711 |       |        |
| Fe4-S4A               | 2.283        | 2.120     | 0.370 | 0.644 |       |                       | 2.149     | 0.370 | 0.696 |       |        |

|         |       |       |       |       |        |       |       |       |       |        |        |
|---------|-------|-------|-------|-------|--------|-------|-------|-------|-------|--------|--------|
| Fe4-SG  | 2.368 | 2.120 | 0.370 | 0.512 | 2.318  | 0.318 | 2.149 | 0.370 | 0.553 | 2.507  | -0.493 |
| Fe5-S1  | 2.600 | 2.120 | 0.370 | 0.273 |        |       | 2.149 | 0.370 | 0.296 |        |        |
| Fe5-S2B | 2.196 | 2.120 | 0.370 | 0.814 |        |       | 2.149 | 0.370 | 0.881 |        |        |
| Fe5-S4B | 2.307 | 2.120 | 0.370 | 0.603 |        |       | 2.149 | 0.370 | 0.652 |        |        |
| Fe5-SG  | 2.204 | 2.120 | 0.370 | 0.797 | 2.488  | 0.488 | 2.149 | 0.370 | 0.862 | 2.691  | -0.309 |
| Fe6-S1  | 2.675 | 2.120 | 0.370 | 0.223 |        |       | 2.149 | 0.370 | 0.241 |        |        |
| Fe6-S2B | 2.264 | 2.120 | 0.370 | 0.678 |        |       | 2.149 | 0.370 | 0.733 |        |        |
| Fe6-S3B | 2.302 | 2.120 | 0.370 | 0.611 |        |       | 2.149 | 0.370 | 0.661 |        |        |
| Fe6-SG  | 2.248 | 2.120 | 0.370 | 0.708 | 2.220  | 0.220 | 2.149 | 0.370 | 0.765 | 2.401  | -0.599 |
| Fe7-S2B | 2.261 | 2.120 | 0.370 | 0.683 |        |       | 2.149 | 0.370 | 0.739 |        |        |
| Fe7-S3B | 2.318 | 2.120 | 0.370 | 0.586 |        |       | 2.149 | 0.370 | 0.633 |        |        |
| Fe7-S4B | 2.278 | 2.120 | 0.370 | 0.652 |        |       | 2.149 | 0.370 | 0.706 |        |        |
| Fe7-SG  | 2.492 | 2.120 | 0.370 | 0.366 | 2.287  | 0.287 | 2.149 | 0.370 | 0.396 | 2.474  | -0.526 |
| Fe8-S1  | 2.375 | 2.120 | 0.370 | 0.502 |        |       | 2.149 | 0.370 | 0.543 |        |        |
| Fe8-S3B | 2.300 | 2.120 | 0.370 | 0.615 |        |       | 2.149 | 0.370 | 0.665 |        |        |
| Fe8-S4B | 2.312 | 2.120 | 0.370 | 0.595 |        |       | 2.149 | 0.370 | 0.644 |        |        |
| Fe8-SG  | 2.317 | 2.120 | 0.370 | 0.587 | 2.299  | 0.299 | 2.149 | 0.370 | 0.635 | 2.487  | -0.513 |
|         |       |       |       |       | 18.934 |       |       |       |       | 20.477 |        |

**Table S82** The adopted bond valence analyses for irons in P-cluster [2] from MoFe protein 6O7P which is reported as P<sup>N</sup> at 1.7 Å resolution.

| Bond                  | $r_{ij}$ (Å) | $R_0$ (Å) | B (Å) | Bval  | Sum   | Diff.                 | $R_0$ (Å) | B (Å) | Bval  | Sum   | Diff.  |
|-----------------------|--------------|-----------|-------|-------|-------|-----------------------|-----------|-------|-------|-------|--------|
| expected valence = +2 |              |           |       |       |       | expected valence = +3 |           |       |       |       |        |
| Fe1-S1                | 2.426        | 2.120     | 0.370 | 0.437 |       |                       | 2.149     | 0.370 | 0.473 |       |        |
| Fe1-S2A               | 2.266        | 2.120     | 0.370 | 0.674 |       |                       | 2.149     | 0.370 | 0.729 |       |        |
| Fe1-S3A               | 2.258        | 2.120     | 0.370 | 0.689 |       |                       | 2.149     | 0.370 | 0.745 |       |        |
| Fe1-SG                | 2.337        | 2.120     | 0.370 | 0.556 | 2.356 | 0.356                 | 2.149     | 0.370 | 0.602 | 2.548 | -0.452 |
| Fe2-S1                | 2.412        | 2.120     | 0.370 | 0.454 |       |                       | 2.149     | 0.370 | 0.491 |       |        |
| Fe2-S2A               | 2.274        | 2.120     | 0.370 | 0.660 |       |                       | 2.149     | 0.370 | 0.713 |       |        |
| Fe2-S4A               | 2.283        | 2.120     | 0.370 | 0.644 |       |                       | 2.149     | 0.370 | 0.696 |       |        |
| Fe2-SG                | 2.311        | 2.120     | 0.370 | 0.597 | 2.354 | 0.354                 | 2.149     | 0.370 | 0.645 | 2.546 | -0.454 |
| Fe3-S2A               | 2.268        | 2.120     | 0.370 | 0.670 |       |                       | 2.149     | 0.370 | 0.725 |       |        |
| Fe3-S3A               | 2.245        | 2.120     | 0.370 | 0.713 |       |                       | 2.149     | 0.370 | 0.771 |       |        |
| Fe3-S4A               | 2.303        | 2.120     | 0.370 | 0.610 |       |                       | 2.149     | 0.370 | 0.660 |       |        |
| Fe3-SG                | 2.311        | 2.120     | 0.370 | 0.597 | 2.590 | 0.590                 | 2.149     | 0.370 | 0.645 | 2.801 | -0.199 |
| Fe4-S1                | 2.376        | 2.120     | 0.370 | 0.501 |       |                       | 2.149     | 0.370 | 0.541 |       |        |
| Fe4-S3A               | 2.276        | 2.120     | 0.370 | 0.656 |       |                       | 2.149     | 0.370 | 0.709 |       |        |
| Fe4-S4A               | 2.285        | 2.120     | 0.370 | 0.640 |       |                       | 2.149     | 0.370 | 0.692 |       |        |

|         |       |       |       |       |        |       |       |       |       |        |        |
|---------|-------|-------|-------|-------|--------|-------|-------|-------|-------|--------|--------|
| Fe4-SG  | 2.372 | 2.120 | 0.370 | 0.506 | 2.303  | 0.303 | 2.149 | 0.370 | 0.547 | 2.491  | -0.509 |
| Fe5-S1  | 2.517 | 2.120 | 0.370 | 0.342 |        |       | 2.149 | 0.370 | 0.370 |        |        |
| Fe5-S2B | 2.195 | 2.120 | 0.370 | 0.817 |        |       | 2.149 | 0.370 | 0.883 |        |        |
| Fe5-S4B | 2.307 | 2.120 | 0.370 | 0.603 |        |       | 2.149 | 0.370 | 0.652 |        |        |
| Fe5-SG  | 2.184 | 2.120 | 0.370 | 0.841 | 2.603  | 0.603 | 2.149 | 0.370 | 0.910 | 2.815  | -0.185 |
| Fe6-S1  | 2.667 | 2.120 | 0.370 | 0.228 |        |       | 2.149 | 0.370 | 0.247 |        |        |
| Fe6-S2B | 2.268 | 2.120 | 0.370 | 0.670 |        |       | 2.149 | 0.370 | 0.725 |        |        |
| Fe6-S3B | 2.314 | 2.120 | 0.370 | 0.592 |        |       | 2.149 | 0.370 | 0.640 |        |        |
| Fe6-SG  | 2.289 | 2.120 | 0.370 | 0.633 | 2.124  | 0.124 | 2.149 | 0.370 | 0.685 | 2.297  | -0.703 |
| Fe7-S2B | 2.259 | 2.120 | 0.370 | 0.687 |        |       | 2.149 | 0.370 | 0.743 |        |        |
| Fe7-S3B | 2.321 | 2.120 | 0.370 | 0.581 |        |       | 2.149 | 0.370 | 0.628 |        |        |
| Fe7-S4B | 2.287 | 2.120 | 0.370 | 0.637 |        |       | 2.149 | 0.370 | 0.689 |        |        |
| Fe7-SG  | 2.528 | 2.120 | 0.370 | 0.332 | 2.236  | 0.236 | 2.149 | 0.370 | 0.359 | 2.419  | -0.581 |
| Fe8-S1  | 2.386 | 2.120 | 0.370 | 0.487 |        |       | 2.149 | 0.370 | 0.527 |        |        |
| Fe8-S3B | 2.289 | 2.120 | 0.370 | 0.633 |        |       | 2.149 | 0.370 | 0.685 |        |        |
| Fe8-S4B | 2.311 | 2.120 | 0.370 | 0.597 |        |       | 2.149 | 0.370 | 0.645 |        |        |
| Fe8-SG  | 2.338 | 2.120 | 0.370 | 0.555 | 2.272  | 0.272 | 2.149 | 0.370 | 0.600 | 2.457  | -0.543 |
|         |       |       |       |       | 18.839 |       |       |       |       | 20.375 |        |

**Table S83** The adopted bond valence analyses for irons in P-cluster [1] from MoFe protein 6O7Q which is reported as P<sup>N</sup> at 2.0 Å resolution.

| Bond                  | $r_{ij}$ (Å) | $R_0$ (Å) | B (Å) | Bval  | Sum   | Diff.                 | $R_0$ (Å) | B (Å) | Bval  | Sum   | Diff.  |
|-----------------------|--------------|-----------|-------|-------|-------|-----------------------|-----------|-------|-------|-------|--------|
| expected valence = +2 |              |           |       |       |       | expected valence = +3 |           |       |       |       |        |
| Fe1-S1                | 2.468        | 2.120     | 0.370 | 0.390 |       |                       | 2.149     | 0.370 | 0.422 |       |        |
| Fe1-S2A               | 2.295        | 2.120     | 0.370 | 0.623 |       |                       | 2.149     | 0.370 | 0.674 |       |        |
| Fe1-S3A               | 2.284        | 2.120     | 0.370 | 0.642 |       |                       | 2.149     | 0.370 | 0.694 |       |        |
| Fe1-SG                | 2.406        | 2.120     | 0.370 | 0.462 | 2.117 | 0.117                 | 2.149     | 0.370 | 0.499 | 2.290 | -0.710 |
| Fe2-S1                | 2.453        | 2.120     | 0.370 | 0.407 |       |                       | 2.149     | 0.370 | 0.440 |       |        |
| Fe2-S2A               | 2.258        | 2.120     | 0.370 | 0.689 |       |                       | 2.149     | 0.370 | 0.745 |       |        |
| Fe2-S4A               | 2.273        | 2.120     | 0.370 | 0.661 |       |                       | 2.149     | 0.370 | 0.715 |       |        |
| Fe2-SG                | 2.399        | 2.120     | 0.370 | 0.470 | 2.227 | 0.227                 | 2.149     | 0.370 | 0.509 | 2.409 | -0.591 |
| Fe3-S2A               | 2.310        | 2.120     | 0.370 | 0.598 |       |                       | 2.149     | 0.370 | 0.647 |       |        |
| Fe3-S3A               | 2.294        | 2.120     | 0.370 | 0.625 |       |                       | 2.149     | 0.370 | 0.676 |       |        |
| Fe3-S4A               | 2.282        | 2.120     | 0.370 | 0.645 |       |                       | 2.149     | 0.370 | 0.698 |       |        |
| Fe3-SG                | 2.273        | 2.120     | 0.370 | 0.661 | 2.530 | 0.530                 | 2.149     | 0.370 | 0.715 | 2.736 | -0.264 |
| Fe4-S1                | 2.405        | 2.120     | 0.370 | 0.463 |       |                       | 2.149     | 0.370 | 0.501 |       |        |
| Fe4-S3A               | 2.276        | 2.120     | 0.370 | 0.656 |       |                       | 2.149     | 0.370 | 0.709 |       |        |
| Fe4-S4A               | 2.315        | 2.120     | 0.370 | 0.590 |       |                       | 2.149     | 0.370 | 0.638 |       |        |

|         |       |       |       |       |        |        |       |       |       |        |        |
|---------|-------|-------|-------|-------|--------|--------|-------|-------|-------|--------|--------|
| Fe4-SG  | 2.444 | 2.120 | 0.370 | 0.417 | 2.126  | 0.126  | 2.149 | 0.370 | 0.451 | 2.299  | -0.701 |
| Fe5-S1  | 2.708 | 2.120 | 0.370 | 0.204 |        |        | 2.149 | 0.370 | 0.221 |        |        |
| Fe5-S2B | 2.178 | 2.120 | 0.370 | 0.855 |        |        | 2.149 | 0.370 | 0.925 |        |        |
| Fe5-S4B | 2.322 | 2.120 | 0.370 | 0.579 |        |        | 2.149 | 0.370 | 0.627 |        |        |
| Fe5-SG  | 2.283 | 2.120 | 0.370 | 0.644 | 2.282  | 0.282  | 2.149 | 0.370 | 0.696 | 2.468  | -0.532 |
| Fe6-S1  | 2.945 | 2.120 | 0.370 | 0.108 |        |        | 2.149 | 0.370 | 0.116 |        |        |
| Fe6-S2B | 2.245 | 2.120 | 0.370 | 0.713 |        |        | 2.149 | 0.370 | 0.771 |        |        |
| Fe6-S3B | 2.336 | 2.120 | 0.370 | 0.558 |        |        | 2.149 | 0.370 | 0.603 |        |        |
| Fe6-SG  | 2.304 | 2.120 | 0.370 | 0.608 | 1.987  | -0.013 | 2.149 | 0.370 | 0.658 | 2.149  | -0.851 |
| Fe7-S2B | 2.256 | 2.120 | 0.370 | 0.692 |        |        | 2.149 | 0.370 | 0.749 |        |        |
| Fe7-S3B | 2.341 | 2.120 | 0.370 | 0.550 |        |        | 2.149 | 0.370 | 0.595 |        |        |
| Fe7-S4B | 2.279 | 2.120 | 0.370 | 0.651 |        |        | 2.149 | 0.370 | 0.704 |        |        |
| Fe7-SG  | 2.501 | 2.120 | 0.370 | 0.357 | 2.251  | 0.251  | 2.149 | 0.370 | 0.386 | 2.434  | -0.566 |
| Fe8-S1  | 2.395 | 2.120 | 0.370 | 0.476 |        |        | 2.149 | 0.370 | 0.514 |        |        |
| Fe8-S3B | 2.259 | 2.120 | 0.370 | 0.687 |        |        | 2.149 | 0.370 | 0.743 |        |        |
| Fe8-S4B | 2.336 | 2.120 | 0.370 | 0.558 |        |        | 2.149 | 0.370 | 0.603 |        |        |
| Fe8-SG  | 2.287 | 2.120 | 0.370 | 0.637 | 2.357  | 0.357  | 2.149 | 0.370 | 0.689 | 2.549  | -0.451 |
|         |       |       |       |       | 17.876 |        |       |       |       | 19.334 |        |

**Table S84** The adopted bond valence analyses for irons in P-cluster [2] from MoFe protein 6O7Q which is reported as P<sup>N</sup> at 2.0 Å resolution.

| Bond                  | $r_{ij}$ (Å) | $R_0$ (Å) | B (Å) | Bval  | Sum   | Diff.                 | $R_0$ (Å) | B (Å) | Bval  | Sum   | Diff.  |
|-----------------------|--------------|-----------|-------|-------|-------|-----------------------|-----------|-------|-------|-------|--------|
| expected valence = +2 |              |           |       |       |       | expected valence = +3 |           |       |       |       |        |
| Fe1-S1                | 2.453        | 2.120     | 0.370 | 0.407 |       |                       | 2.149     | 0.370 | 0.440 |       |        |
| Fe1-S2A               | 2.310        | 2.120     | 0.370 | 0.598 |       |                       | 2.149     | 0.370 | 0.647 |       |        |
| Fe1-S3A               | 2.270        | 2.120     | 0.370 | 0.667 |       |                       | 2.149     | 0.370 | 0.721 |       |        |
| Fe1-SG                | 2.459        | 2.120     | 0.370 | 0.400 | 2.072 | 0.072                 | 2.149     | 0.370 | 0.433 | 2.241 | -0.759 |
| Fe2-S1                | 2.456        | 2.120     | 0.370 | 0.403 |       |                       | 2.149     | 0.370 | 0.436 |       |        |
| Fe2-S2A               | 2.247        | 2.120     | 0.370 | 0.709 |       |                       | 2.149     | 0.370 | 0.767 |       |        |
| Fe2-S4A               | 2.285        | 2.120     | 0.370 | 0.640 |       |                       | 2.149     | 0.370 | 0.692 |       |        |
| Fe2-SG                | 2.365        | 2.120     | 0.370 | 0.516 | 2.269 | 0.269                 | 2.149     | 0.370 | 0.558 | 2.454 | -0.546 |
| Fe3-S2A               | 2.262        | 2.120     | 0.370 | 0.681 |       |                       | 2.149     | 0.370 | 0.737 |       |        |
| Fe3-S3A               | 2.266        | 2.120     | 0.370 | 0.674 |       |                       | 2.149     | 0.370 | 0.729 |       |        |
| Fe3-S4A               | 2.290        | 2.120     | 0.370 | 0.632 |       |                       | 2.149     | 0.370 | 0.683 |       |        |
| Fe3-SG                | 2.317        | 2.120     | 0.370 | 0.587 | 2.574 | 0.574                 | 2.149     | 0.370 | 0.635 | 2.784 | -0.216 |
| Fe4-S1                | 2.392        | 2.120     | 0.370 | 0.479 |       |                       | 2.149     | 0.370 | 0.519 |       |        |
| Fe4-S3A               | 2.245        | 2.120     | 0.370 | 0.713 |       |                       | 2.149     | 0.370 | 0.771 |       |        |
| Fe4-S4A               | 2.298        | 2.120     | 0.370 | 0.618 |       |                       | 2.149     | 0.370 | 0.669 |       |        |



|         |       |       |       |       |        |        |       |       |       |        |        |
|---------|-------|-------|-------|-------|--------|--------|-------|-------|-------|--------|--------|
| Fe4-SG  | 2.423 | 2.120 | 0.370 | 0.441 | 2.252  | 0.252  | 2.149 | 0.370 | 0.477 | 2.435  | -0.565 |
| Fe5-S1  | 2.724 | 2.120 | 0.370 | 0.195 |        |        | 2.149 | 0.370 | 0.211 |        |        |
| Fe5-S2B | 2.185 | 2.120 | 0.370 | 0.839 |        |        | 2.149 | 0.370 | 0.907 |        |        |
| Fe5-S4B | 2.294 | 2.120 | 0.370 | 0.625 |        |        | 2.149 | 0.370 | 0.676 |        |        |
| Fe5-SG  | 2.264 | 2.120 | 0.370 | 0.678 | 2.337  | 0.337  | 2.149 | 0.370 | 0.733 | 2.527  | -0.473 |
| Fe6-S1  | 2.953 | 2.120 | 0.370 | 0.105 |        |        | 2.149 | 0.370 | 0.114 |        |        |
| Fe6-S2B | 2.273 | 2.120 | 0.370 | 0.661 |        |        | 2.149 | 0.370 | 0.715 |        |        |
| Fe6-S3B | 2.292 | 2.120 | 0.370 | 0.628 |        |        | 2.149 | 0.370 | 0.679 |        |        |
| Fe6-SG  | 2.421 | 2.120 | 0.370 | 0.443 | 1.838  | -0.162 | 2.149 | 0.370 | 0.479 | 1.988  | -1.012 |
| Fe7-S2B | 2.239 | 2.120 | 0.370 | 0.725 |        |        | 2.149 | 0.370 | 0.784 |        |        |
| Fe7-S3B | 2.359 | 2.120 | 0.370 | 0.524 |        |        | 2.149 | 0.370 | 0.567 |        |        |
| Fe7-S4B | 2.310 | 2.120 | 0.370 | 0.598 |        |        | 2.149 | 0.370 | 0.647 |        |        |
| Fe7-SG  | 2.434 | 2.120 | 0.370 | 0.428 | 2.276  | 0.276  | 2.149 | 0.370 | 0.463 | 2.461  | -0.539 |
| Fe8-S1  | 2.393 | 2.120 | 0.370 | 0.478 |        |        | 2.149 | 0.370 | 0.517 |        |        |
| Fe8-S3B | 2.278 | 2.120 | 0.370 | 0.652 |        |        | 2.149 | 0.370 | 0.706 |        |        |
| Fe8-S4B | 2.302 | 2.120 | 0.370 | 0.611 |        |        | 2.149 | 0.370 | 0.661 |        |        |
| Fe8-SG  | 2.346 | 2.120 | 0.370 | 0.543 | 2.285  | 0.285  | 2.149 | 0.370 | 0.587 | 2.471  | -0.529 |
|         |       |       |       |       | 17.902 |        |       |       |       | 19.361 |        |

**Table S85** The adopted bond valence analyses for irons in P-cluster [1] from MoFe protein 6O7R which is reported as P<sup>N</sup> at 2.27 Å resolution.

| Bond                  | $r_{ij}$ (Å) | $R_0$ (Å) | B (Å) | Bval  | Sum   | Diff.                 | $R_0$ (Å) | B (Å) | Bval  | Sum   | Diff.  |
|-----------------------|--------------|-----------|-------|-------|-------|-----------------------|-----------|-------|-------|-------|--------|
| expected valence = +2 |              |           |       |       |       | expected valence = +3 |           |       |       |       |        |
| Fe1-S1                | 2.460        | 2.120     | 0.370 | 0.399 |       |                       | 2.149     | 0.370 | 0.431 |       |        |
| Fe1-S2A               | 2.248        | 2.120     | 0.370 | 0.708 |       |                       | 2.149     | 0.370 | 0.765 |       |        |
| Fe1-S3A               | 2.185        | 2.120     | 0.370 | 0.839 |       |                       | 2.149     | 0.370 | 0.907 |       |        |
| Fe1-SG                | 2.493        | 2.120     | 0.370 | 0.365 | 2.310 | 0.310                 | 2.149     | 0.370 | 0.395 | 2.499 | -0.501 |
| Fe2-S1                | 2.382        | 2.120     | 0.370 | 0.493 |       |                       | 2.149     | 0.370 | 0.533 |       |        |
| Fe2-S2A               | 2.245        | 2.120     | 0.370 | 0.713 |       |                       | 2.149     | 0.370 | 0.771 |       |        |
| Fe2-S4A               | 2.246        | 2.120     | 0.370 | 0.711 |       |                       | 2.149     | 0.370 | 0.769 |       |        |
| Fe2-SG                | 2.377        | 2.120     | 0.370 | 0.499 | 2.417 | 0.417                 | 2.149     | 0.370 | 0.540 | 2.614 | -0.386 |
| Fe3-S2A               | 2.259        | 2.120     | 0.370 | 0.687 |       |                       | 2.149     | 0.370 | 0.743 |       |        |
| Fe3-S3A               | 2.267        | 2.120     | 0.370 | 0.672 |       |                       | 2.149     | 0.370 | 0.727 |       |        |
| Fe3-S4A               | 2.259        | 2.120     | 0.370 | 0.687 |       |                       | 2.149     | 0.370 | 0.743 |       |        |
| Fe3-SG                | 2.251        | 2.120     | 0.370 | 0.702 | 2.748 | 0.748                 | 2.149     | 0.370 | 0.759 | 2.972 | -0.028 |
| Fe4-S1                | 2.351        | 2.120     | 0.370 | 0.536 |       |                       | 2.149     | 0.370 | 0.579 |       |        |
| Fe4-S3A               | 2.207        | 2.120     | 0.370 | 0.790 |       |                       | 2.149     | 0.370 | 0.855 |       |        |
| Fe4-S4A               | 2.261        | 2.120     | 0.370 | 0.683 |       |                       | 2.149     | 0.370 | 0.739 |       |        |

|         |       |       |       |       |        |       |       |       |       |        |        |
|---------|-------|-------|-------|-------|--------|-------|-------|-------|-------|--------|--------|
| Fe4-SG  | 2.414 | 2.120 | 0.370 | 0.452 | 2.461  | 0.461 | 2.149 | 0.370 | 0.489 | 2.662  | -0.338 |
| Fe5-S1  | 2.839 | 2.120 | 0.370 | 0.143 |        |       | 2.149 | 0.370 | 0.155 |        |        |
| Fe5-S2B | 2.157 | 2.120 | 0.370 | 0.905 |        |       | 2.149 | 0.370 | 0.979 |        |        |
| Fe5-S4B | 2.276 | 2.120 | 0.370 | 0.656 |        |       | 2.149 | 0.370 | 0.709 |        |        |
| Fe5-SG  | 2.241 | 2.120 | 0.370 | 0.721 | 2.425  | 0.425 | 2.149 | 0.370 | 0.780 | 2.623  | -0.377 |
| Fe6-S1  | 2.981 | 2.120 | 0.370 | 0.098 |        |       | 2.149 | 0.370 | 0.106 |        |        |
| Fe6-S2B | 2.283 | 2.120 | 0.370 | 0.644 |        |       | 2.149 | 0.370 | 0.696 |        |        |
| Fe6-S3B | 2.289 | 2.120 | 0.370 | 0.633 |        |       | 2.149 | 0.370 | 0.685 |        |        |
| Fe6-SG  | 2.222 | 2.120 | 0.370 | 0.759 | 2.134  | 0.134 | 2.149 | 0.370 | 0.821 | 2.308  | -0.692 |
| Fe7-S2B | 2.232 | 2.120 | 0.370 | 0.739 |        |       | 2.149 | 0.370 | 0.799 |        |        |
| Fe7-S3B | 2.256 | 2.120 | 0.370 | 0.692 |        |       | 2.149 | 0.370 | 0.749 |        |        |
| Fe7-S4B | 2.291 | 2.120 | 0.370 | 0.630 |        |       | 2.149 | 0.370 | 0.681 |        |        |
| Fe7-SG  | 2.586 | 2.120 | 0.370 | 0.284 | 2.345  | 0.345 | 2.149 | 0.370 | 0.307 | 2.536  | -0.464 |
| Fe8-S1  | 2.347 | 2.120 | 0.370 | 0.541 |        |       | 2.149 | 0.370 | 0.586 |        |        |
| Fe8-S3B | 2.233 | 2.120 | 0.370 | 0.737 |        |       | 2.149 | 0.370 | 0.797 |        |        |
| Fe8-S4B | 2.251 | 2.120 | 0.370 | 0.702 |        |       | 2.149 | 0.370 | 0.759 |        |        |
| Fe8-SG  | 2.273 | 2.120 | 0.370 | 0.661 | 2.641  | 0.641 | 2.149 | 0.370 | 0.715 | 2.857  | -0.143 |
|         |       |       |       |       | 19.481 |       |       |       |       | 21.069 |        |

**Table S86** The adopted bond valence analyses for irons in P-cluster [2] from MoFe protein 6O7R which is reported as P<sup>N</sup> at 2.27 Å resolution.

| Bond                  | $r_{ij}$ (Å) | $R_0$ (Å) | B (Å) | Bval  | Sum   | Diff.                 | $R_0$ (Å) | B (Å) | Bval  | Sum   | Diff.  |
|-----------------------|--------------|-----------|-------|-------|-------|-----------------------|-----------|-------|-------|-------|--------|
| expected valence = +2 |              |           |       |       |       | expected valence = +3 |           |       |       |       |        |
| Fe1-S1                | 2.456        | 2.120     | 0.370 | 0.403 |       |                       | 2.149     | 0.370 | 0.436 |       |        |
| Fe1-S2A               | 2.242        | 2.120     | 0.370 | 0.719 |       |                       | 2.149     | 0.370 | 0.778 |       |        |
| Fe1-S3A               | 2.221        | 2.120     | 0.370 | 0.761 |       |                       | 2.149     | 0.370 | 0.823 |       |        |
| Fe1-SG                | 2.401        | 2.120     | 0.370 | 0.468 | 2.351 | 0.351                 | 2.149     | 0.370 | 0.506 | 2.543 | -0.457 |
| Fe2-S1                | 2.392        | 2.120     | 0.370 | 0.479 |       |                       | 2.149     | 0.370 | 0.519 |       |        |
| Fe2-S2A               | 2.230        | 2.120     | 0.370 | 0.743 |       |                       | 2.149     | 0.370 | 0.803 |       |        |
| Fe2-S4A               | 2.257        | 2.120     | 0.370 | 0.691 |       |                       | 2.149     | 0.370 | 0.747 |       |        |
| Fe2-SG                | 2.341        | 2.120     | 0.370 | 0.550 | 2.463 | 0.463                 | 2.149     | 0.370 | 0.595 | 2.664 | -0.336 |
| Fe3-S2A               | 2.241        | 2.120     | 0.370 | 0.721 |       |                       | 2.149     | 0.370 | 0.780 |       |        |
| Fe3-S3A               | 2.284        | 2.120     | 0.370 | 0.642 |       |                       | 2.149     | 0.370 | 0.694 |       |        |
| Fe3-S4A               | 2.260        | 2.120     | 0.370 | 0.685 |       |                       | 2.149     | 0.370 | 0.741 |       |        |
| Fe3-SG                | 2.234        | 2.120     | 0.370 | 0.735 | 2.783 | 0.783                 | 2.149     | 0.370 | 0.795 | 3.010 | 0.010  |
| Fe4-S1                | 2.355        | 2.120     | 0.370 | 0.530 |       |                       | 2.149     | 0.370 | 0.573 |       |        |
| Fe4-S3A               | 2.199        | 2.120     | 0.370 | 0.808 |       |                       | 2.149     | 0.370 | 0.874 |       |        |
| Fe4-S4A               | 2.233        | 2.120     | 0.370 | 0.737 |       |                       | 2.149     | 0.370 | 0.797 |       |        |

|         |       |       |       |       |        |       |       |       |       |        |        |
|---------|-------|-------|-------|-------|--------|-------|-------|-------|-------|--------|--------|
| Fe4-SG  | 2.420 | 2.120 | 0.370 | 0.444 | 2.519  | 0.519 | 2.149 | 0.370 | 0.481 | 2.724  | -0.276 |
| Fe5-S1  | 2.856 | 2.120 | 0.370 | 0.137 |        |       | 2.149 | 0.370 | 0.148 |        |        |
| Fe5-S2B | 2.152 | 2.120 | 0.370 | 0.917 |        |       | 2.149 | 0.370 | 0.992 |        |        |
| Fe5-S4B | 2.246 | 2.120 | 0.370 | 0.711 |        |       | 2.149 | 0.370 | 0.769 |        |        |
| Fe5-SG  | 2.234 | 2.120 | 0.370 | 0.735 | 2.500  | 0.500 | 2.149 | 0.370 | 0.795 | 2.704  | -0.296 |
| Fe6-S1  | 3.027 | 2.120 | 0.370 | 0.086 |        |       | 2.149 | 0.370 | 0.093 |        |        |
| Fe6-S2B | 2.256 | 2.120 | 0.370 | 0.692 |        |       | 2.149 | 0.370 | 0.749 |        |        |
| Fe6-S3B | 2.318 | 2.120 | 0.370 | 0.586 |        |       | 2.149 | 0.370 | 0.633 |        |        |
| Fe6-SG  | 2.217 | 2.120 | 0.370 | 0.769 | 2.134  | 0.134 | 2.149 | 0.370 | 0.832 | 2.308  | -0.692 |
| Fe7-S2B | 2.235 | 2.120 | 0.370 | 0.733 |        |       | 2.149 | 0.370 | 0.793 |        |        |
| Fe7-S3B | 2.249 | 2.120 | 0.370 | 0.706 |        |       | 2.149 | 0.370 | 0.763 |        |        |
| Fe7-S4B | 2.279 | 2.120 | 0.370 | 0.651 |        |       | 2.149 | 0.370 | 0.704 |        |        |
| Fe7-SG  | 2.655 | 2.120 | 0.370 | 0.236 | 2.325  | 0.325 | 2.149 | 0.370 | 0.255 | 2.514  | -0.486 |
| Fe8-S1  | 2.302 | 2.120 | 0.370 | 0.611 |        |       | 2.149 | 0.370 | 0.661 |        |        |
| Fe8-S3B | 2.251 | 2.120 | 0.370 | 0.702 |        |       | 2.149 | 0.370 | 0.759 |        |        |
| Fe8-S4B | 2.257 | 2.120 | 0.370 | 0.691 |        |       | 2.149 | 0.370 | 0.747 |        |        |
| Fe8-SG  | 2.281 | 2.120 | 0.370 | 0.647 | 2.651  | 0.651 | 2.149 | 0.370 | 0.700 | 2.867  | -0.133 |
|         |       |       |       |       | 19.726 |       |       |       |       | 21.334 |        |

**Table S87** The adopted bond valence analyses for irons in P-cluster [1] from MoFe protein 6OP3 which is reported as P<sup>N</sup> at 1.6 Å resolution.

| Bond                  | $r_{ij}$ (Å) | $R_0$ (Å) | B (Å) | Bval  | Sum   | Diff.                 | $R_0$ (Å) | B (Å) | Bval  | Sum   | Diff.  |
|-----------------------|--------------|-----------|-------|-------|-------|-----------------------|-----------|-------|-------|-------|--------|
| expected valence = +2 |              |           |       |       |       | expected valence = +3 |           |       |       |       |        |
| Fe1-S1                | 2.431        | 2.120     | 0.370 | 0.431 |       |                       | 2.149     | 0.370 | 0.467 |       |        |
| Fe1-S2A               | 2.168        | 2.120     | 0.370 | 0.878 |       |                       | 2.149     | 0.370 | 0.950 |       |        |
| Fe1-S3A               | 2.210        | 2.120     | 0.370 | 0.784 |       |                       | 2.149     | 0.370 | 0.848 |       |        |
| Fe1-SG                | 2.351        | 2.120     | 0.370 | 0.536 | 2.630 | 0.630                 | 2.149     | 0.370 | 0.579 | 2.844 | -0.156 |
| Fe2-S1                | 2.447        | 2.120     | 0.370 | 0.413 |       |                       | 2.149     | 0.370 | 0.447 |       |        |
| Fe2-S2A               | 2.197        | 2.120     | 0.370 | 0.812 |       |                       | 2.149     | 0.370 | 0.878 |       |        |
| Fe2-S4A               | 2.183        | 2.120     | 0.370 | 0.843 |       |                       | 2.149     | 0.370 | 0.912 |       |        |
| Fe2-SG                | 2.385        | 2.120     | 0.370 | 0.489 | 2.557 | 0.557                 | 2.149     | 0.370 | 0.528 | 2.766 | -0.234 |
| Fe3-S2A               | 2.241        | 2.120     | 0.370 | 0.721 |       |                       | 2.149     | 0.370 | 0.780 |       |        |
| Fe3-S3A               | 2.301        | 2.120     | 0.370 | 0.613 |       |                       | 2.149     | 0.370 | 0.663 |       |        |
| Fe3-S4A               | 2.196        | 2.120     | 0.370 | 0.814 |       |                       | 2.149     | 0.370 | 0.881 |       |        |
| Fe3-SG                | 2.321        | 2.120     | 0.370 | 0.581 | 2.729 | 0.729                 | 2.149     | 0.370 | 0.628 | 2.952 | -0.048 |
| Fe4-S1                | 2.350        | 2.120     | 0.370 | 0.537 |       |                       | 2.149     | 0.370 | 0.581 |       |        |
| Fe4-S3A               | 2.203        | 2.120     | 0.370 | 0.799 |       |                       | 2.149     | 0.370 | 0.864 |       |        |
| Fe4-S4A               | 2.200        | 2.120     | 0.370 | 0.806 |       |                       | 2.149     | 0.370 | 0.871 |       |        |

|         |       |       |       |       |        |       |       |       |       |        |        |
|---------|-------|-------|-------|-------|--------|-------|-------|-------|-------|--------|--------|
| Fe4-SG  | 2.371 | 2.120 | 0.370 | 0.507 | 2.649  | 0.649 | 2.149 | 0.370 | 0.549 | 2.865  | -0.135 |
| Fe5-S1  | 2.415 | 2.120 | 0.370 | 0.451 |        |       | 2.149 | 0.370 | 0.487 |        |        |
| Fe5-S2B | 2.321 | 2.120 | 0.370 | 0.581 |        |       | 2.149 | 0.370 | 0.628 |        |        |
| Fe5-S4B | 2.310 | 2.120 | 0.370 | 0.598 |        |       | 2.149 | 0.370 | 0.647 |        |        |
| Fe5-SG  | 2.324 | 2.120 | 0.370 | 0.576 | 2.206  | 0.206 | 2.149 | 0.370 | 0.623 | 2.386  | -0.614 |
| Fe6-S1  | 2.493 | 2.120 | 0.370 | 0.365 |        |       | 2.149 | 0.370 | 0.395 |        |        |
| Fe6-S2B | 2.345 | 2.120 | 0.370 | 0.544 |        |       | 2.149 | 0.370 | 0.589 |        |        |
| Fe6-S3B | 2.313 | 2.120 | 0.370 | 0.594 |        |       | 2.149 | 0.370 | 0.642 |        |        |
| Fe6-SG  | 2.325 | 2.120 | 0.370 | 0.575 | 2.077  | 0.077 | 2.149 | 0.370 | 0.621 | 2.247  | -0.753 |
| Fe7-S2B | 2.353 | 2.120 | 0.370 | 0.533 |        |       | 2.149 | 0.370 | 0.576 |        |        |
| Fe7-S3B | 2.351 | 2.120 | 0.370 | 0.536 |        |       | 2.149 | 0.370 | 0.579 |        |        |
| Fe7-S4B | 2.355 | 2.120 | 0.370 | 0.530 |        |       | 2.149 | 0.370 | 0.573 |        |        |
| Fe7-SG  | 2.363 | 2.120 | 0.370 | 0.519 | 2.117  | 0.117 | 2.149 | 0.370 | 0.561 | 2.289  | -0.711 |
| Fe8-S1  | 2.421 | 2.120 | 0.370 | 0.443 |        |       | 2.149 | 0.370 | 0.479 |        |        |
| Fe8-S3B | 2.289 | 2.120 | 0.370 | 0.633 |        |       | 2.149 | 0.370 | 0.685 |        |        |
| Fe8-S4B | 2.303 | 2.120 | 0.370 | 0.610 |        |       | 2.149 | 0.370 | 0.660 |        |        |
| Fe8-SG  | 2.316 | 2.120 | 0.370 | 0.589 | 2.275  | 0.275 | 2.149 | 0.370 | 0.637 | 2.461  | -0.539 |
|         |       |       |       |       | 19.241 |       |       |       |       | 20.810 |        |

**Table S88** The adopted bond valence analyses for irons in P-cluster [2] from MoFe protein 6OP3 which is reported as P<sup>N</sup> at 1.6 Å resolution.

| Bond                  | $r_{ij}$ (Å) | $R_0$ (Å) | B (Å) | Bval  | Sum   | Diff.                 | $R_0$ (Å) | B (Å) | Bval  | Sum   | Diff.  |
|-----------------------|--------------|-----------|-------|-------|-------|-----------------------|-----------|-------|-------|-------|--------|
| expected valence = +2 |              |           |       |       |       | expected valence = +3 |           |       |       |       |        |
| Fe1-S1                | 2.444        | 2.120     | 0.370 | 0.417 |       |                       | 2.149     | 0.370 | 0.451 |       |        |
| Fe1-S2A               | 2.251        | 2.120     | 0.370 | 0.702 |       |                       | 2.149     | 0.370 | 0.759 |       |        |
| Fe1-S3A               | 2.180        | 2.120     | 0.370 | 0.850 |       |                       | 2.149     | 0.370 | 0.920 |       |        |
| Fe1-SG                | 2.352        | 2.120     | 0.370 | 0.534 | 2.503 | 0.503                 | 2.149     | 0.370 | 0.578 | 2.707 | -0.293 |
| Fe2-S1                | 2.450        | 2.120     | 0.370 | 0.410 |       |                       | 2.149     | 0.370 | 0.443 |       |        |
| Fe2-S2A               | 2.244        | 2.120     | 0.370 | 0.715 |       |                       | 2.149     | 0.370 | 0.774 |       |        |
| Fe2-S4A               | 2.181        | 2.120     | 0.370 | 0.848 |       |                       | 2.149     | 0.370 | 0.917 |       |        |
| Fe2-SG                | 2.395        | 2.120     | 0.370 | 0.476 | 2.449 | 0.449                 | 2.149     | 0.370 | 0.514 | 2.648 | -0.352 |
| Fe3-S2A               | 2.203        | 2.120     | 0.370 | 0.799 |       |                       | 2.149     | 0.370 | 0.864 |       |        |
| Fe3-S3A               | 2.325        | 2.120     | 0.370 | 0.575 |       |                       | 2.149     | 0.370 | 0.621 |       |        |
| Fe3-S4A               | 2.219        | 2.120     | 0.370 | 0.765 |       |                       | 2.149     | 0.370 | 0.828 |       |        |
| Fe3-SG                | 2.324        | 2.120     | 0.370 | 0.576 | 2.715 | 0.715                 | 2.149     | 0.370 | 0.623 | 2.936 | -0.064 |
| Fe4-S1                | 2.355        | 2.120     | 0.370 | 0.530 |       |                       | 2.149     | 0.370 | 0.573 |       |        |
| Fe4-S3A               | 2.170        | 2.120     | 0.370 | 0.874 |       |                       | 2.149     | 0.370 | 0.945 |       |        |
| Fe4-S4A               | 2.180        | 2.120     | 0.370 | 0.850 |       |                       | 2.149     | 0.370 | 0.920 |       |        |



|         |       |       |       |       |        |       |       |       |       |        |        |
|---------|-------|-------|-------|-------|--------|-------|-------|-------|-------|--------|--------|
| Fe4-SG  | 2.388 | 2.120 | 0.370 | 0.485 | 2.738  | 0.738 | 2.149 | 0.370 | 0.524 | 2.962  | -0.038 |
| Fe5-S1  | 2.414 | 2.120 | 0.370 | 0.452 |        |       | 2.149 | 0.370 | 0.489 |        |        |
| Fe5-S2B | 2.303 | 2.120 | 0.370 | 0.610 |        |       | 2.149 | 0.370 | 0.660 |        |        |
| Fe5-S4B | 2.292 | 2.120 | 0.370 | 0.628 |        |       | 2.149 | 0.370 | 0.679 |        |        |
| Fe5-SG  | 2.351 | 2.120 | 0.370 | 0.536 | 2.225  | 0.225 | 2.149 | 0.370 | 0.579 | 2.407  | -0.593 |
| Fe6-S1  | 2.478 | 2.120 | 0.370 | 0.380 |        |       | 2.149 | 0.370 | 0.411 |        |        |
| Fe6-S2B | 2.355 | 2.120 | 0.370 | 0.530 |        |       | 2.149 | 0.370 | 0.573 |        |        |
| Fe6-S3B | 2.324 | 2.120 | 0.370 | 0.576 |        |       | 2.149 | 0.370 | 0.623 |        |        |
| Fe6-SG  | 2.302 | 2.120 | 0.370 | 0.611 | 2.098  | 0.098 | 2.149 | 0.370 | 0.661 | 2.269  | -0.731 |
| Fe7-S2B | 2.354 | 2.120 | 0.370 | 0.531 |        |       | 2.149 | 0.370 | 0.575 |        |        |
| Fe7-S3B | 2.343 | 2.120 | 0.370 | 0.547 |        |       | 2.149 | 0.370 | 0.592 |        |        |
| Fe7-S4B | 2.317 | 2.120 | 0.370 | 0.587 |        |       | 2.149 | 0.370 | 0.635 |        |        |
| Fe7-SG  | 2.354 | 2.120 | 0.370 | 0.531 | 2.197  | 0.197 | 2.149 | 0.370 | 0.575 | 2.376  | -0.624 |
| Fe8-S1  | 2.421 | 2.120 | 0.370 | 0.443 |        |       | 2.149 | 0.370 | 0.479 |        |        |
| Fe8-S3B | 2.318 | 2.120 | 0.370 | 0.586 |        |       | 2.149 | 0.370 | 0.633 |        |        |
| Fe8-S4B | 2.266 | 2.120 | 0.370 | 0.674 |        |       | 2.149 | 0.370 | 0.729 |        |        |
| Fe8-SG  | 2.321 | 2.120 | 0.370 | 0.581 | 2.284  | 0.284 | 2.149 | 0.370 | 0.628 | 2.470  | -0.530 |
|         |       |       |       |       | 19.209 |       |       |       |       | 20.775 |        |

**Table S89** The adopted bond valence analyses for irons in P-cluster [1] from MoFe protein 6VXT which is reported as P<sup>N</sup> at 1.74 Å resolution.

| Bond                  | $r_{ij}$ (Å) | $R_0$ (Å) | B (Å) | Bval  | Sum   | Diff.                 | $R_0$ (Å) | B (Å) | Bval  | Sum   | Diff.  |
|-----------------------|--------------|-----------|-------|-------|-------|-----------------------|-----------|-------|-------|-------|--------|
| expected valence = +2 |              |           |       |       |       | expected valence = +3 |           |       |       |       |        |
| Fe1-S1                | 2.407        | 2.120     | 0.370 | 0.460 |       |                       | 2.149     | 0.370 | 0.498 |       |        |
| Fe1-S2A               | 2.304        | 2.120     | 0.370 | 0.608 |       |                       | 2.149     | 0.370 | 0.658 |       |        |
| Fe1-S3A               | 2.259        | 2.120     | 0.370 | 0.687 |       |                       | 2.149     | 0.370 | 0.743 |       |        |
| Fe1-SG                | 2.419        | 2.120     | 0.370 | 0.446 | 2.201 | 0.201                 | 2.149     | 0.370 | 0.482 | 2.381 | -0.619 |
| Fe2-S1                | 2.481        | 2.120     | 0.370 | 0.377 |       |                       | 2.149     | 0.370 | 0.408 |       |        |
| Fe2-S2A               | 2.291        | 2.120     | 0.370 | 0.630 |       |                       | 2.149     | 0.370 | 0.681 |       |        |
| Fe2-S4A               | 2.292        | 2.120     | 0.370 | 0.628 |       |                       | 2.149     | 0.370 | 0.679 |       |        |
| Fe2-SG                | 2.440        | 2.120     | 0.370 | 0.421 | 2.056 | 0.056                 | 2.149     | 0.370 | 0.455 | 2.224 | -0.776 |
| Fe3-S2A               | 2.332        | 2.120     | 0.370 | 0.564 |       |                       | 2.149     | 0.370 | 0.610 |       |        |
| Fe3-S3A               | 2.348        | 2.120     | 0.370 | 0.540 |       |                       | 2.149     | 0.370 | 0.584 |       |        |
| Fe3-S4A               | 2.287        | 2.120     | 0.370 | 0.637 |       |                       | 2.149     | 0.370 | 0.689 |       |        |
| Fe3-SG                | 2.374        | 2.120     | 0.370 | 0.503 | 2.244 | 0.244                 | 2.149     | 0.370 | 0.544 | 2.427 | -0.573 |
| Fe4-S1                | 2.372        | 2.120     | 0.370 | 0.506 |       |                       | 2.149     | 0.370 | 0.547 |       |        |
| Fe4-S3A               | 2.235        | 2.120     | 0.370 | 0.733 |       |                       | 2.149     | 0.370 | 0.793 |       |        |
| Fe4-S4A               | 2.250        | 2.120     | 0.370 | 0.704 |       |                       | 2.149     | 0.370 | 0.761 |       |        |

|         |       |       |       |       |        |        |       |       |       |        |        |
|---------|-------|-------|-------|-------|--------|--------|-------|-------|-------|--------|--------|
| Fe4-SG  | 2.448 | 2.120 | 0.370 | 0.412 | 2.355  | 0.355  | 2.149 | 0.370 | 0.446 | 2.547  | -0.453 |
| Fe5-S1  | 2.423 | 2.120 | 0.370 | 0.441 |        |        | 2.149 | 0.370 | 0.477 |        |        |
| Fe5-S2B | 2.309 | 2.120 | 0.370 | 0.600 |        |        | 2.149 | 0.370 | 0.649 |        |        |
| Fe5-S4B | 2.235 | 2.120 | 0.370 | 0.733 |        |        | 2.149 | 0.370 | 0.793 |        |        |
| Fe5-SG  | 2.364 | 2.120 | 0.370 | 0.517 | 2.291  | 0.291  | 2.149 | 0.370 | 0.559 | 2.478  | -0.522 |
| Fe6-S1  | 2.503 | 2.120 | 0.370 | 0.355 |        |        | 2.149 | 0.370 | 0.384 |        |        |
| Fe6-S2B | 2.337 | 2.120 | 0.370 | 0.556 |        |        | 2.149 | 0.370 | 0.602 |        |        |
| Fe6-S3B | 2.307 | 2.120 | 0.370 | 0.603 |        |        | 2.149 | 0.370 | 0.652 |        |        |
| Fe6-SG  | 2.413 | 2.120 | 0.370 | 0.453 | 1.968  | -0.032 | 2.149 | 0.370 | 0.490 | 2.128  | -0.872 |
| Fe7-S2B | 2.344 | 2.120 | 0.370 | 0.546 |        |        | 2.149 | 0.370 | 0.590 |        |        |
| Fe7-S3B | 2.360 | 2.120 | 0.370 | 0.523 |        |        | 2.149 | 0.370 | 0.565 |        |        |
| Fe7-S4B | 2.354 | 2.120 | 0.370 | 0.531 |        |        | 2.149 | 0.370 | 0.575 |        |        |
| Fe7-SG  | 2.521 | 2.120 | 0.370 | 0.338 | 1.938  | -0.062 | 2.149 | 0.370 | 0.366 | 2.096  | -0.904 |
| Fe8-S1  | 2.443 | 2.120 | 0.370 | 0.418 |        |        | 2.149 | 0.370 | 0.452 |        |        |
| Fe8-S3B | 2.361 | 2.120 | 0.370 | 0.521 |        |        | 2.149 | 0.370 | 0.564 |        |        |
| Fe8-S4B | 2.248 | 2.120 | 0.370 | 0.708 |        |        | 2.149 | 0.370 | 0.765 |        |        |
| Fe8-SG  | 2.463 | 2.120 | 0.370 | 0.396 | 2.042  | 0.042  | 2.149 | 0.370 | 0.428 | 2.209  | -0.791 |
|         |       |       |       |       | 17.095 |        |       |       |       | 18.489 |        |

**Table S90** The adopted bond valence analyses for irons in P-cluster [2] from MoFe protein 6VXT which is reported as P<sup>N</sup> at 1.74 Å resolution.

| Bond                  | $r_{ij}$ (Å) | $R_0$ (Å) | B (Å) | Bval  | Sum   | Diff.                 | $R_0$ (Å) | B (Å) | Bval  | Sum   | Diff.  |
|-----------------------|--------------|-----------|-------|-------|-------|-----------------------|-----------|-------|-------|-------|--------|
| expected valence = +2 |              |           |       |       |       | expected valence = +3 |           |       |       |       |        |
| Fe1-S1                | 2.428        | 2.120     | 0.370 | 0.435 |       |                       | 2.149     | 0.370 | 0.470 |       |        |
| Fe1-S2A               | 2.323        | 2.120     | 0.370 | 0.578 |       |                       | 2.149     | 0.370 | 0.625 |       |        |
| Fe1-S3A               | 2.193        | 2.120     | 0.370 | 0.821 |       |                       | 2.149     | 0.370 | 0.888 |       |        |
| Fe1-SG                | 2.373        | 2.120     | 0.370 | 0.505 | 2.338 | 0.338                 | 2.149     | 0.370 | 0.546 | 2.529 | -0.471 |
| Fe2-S1                | 2.492        | 2.120     | 0.370 | 0.366 |       |                       | 2.149     | 0.370 | 0.396 |       |        |
| Fe2-S2A               | 2.292        | 2.120     | 0.370 | 0.628 |       |                       | 2.149     | 0.370 | 0.679 |       |        |
| Fe2-S4A               | 2.291        | 2.120     | 0.370 | 0.630 |       |                       | 2.149     | 0.370 | 0.681 |       |        |
| Fe2-SG                | 2.408        | 2.120     | 0.370 | 0.459 | 2.083 | 0.083                 | 2.149     | 0.370 | 0.497 | 2.253 | -0.747 |
| Fe3-S2A               | 2.331        | 2.120     | 0.370 | 0.565 |       |                       | 2.149     | 0.370 | 0.611 |       |        |
| Fe3-S3A               | 2.372        | 2.120     | 0.370 | 0.506 |       |                       | 2.149     | 0.370 | 0.547 |       |        |
| Fe3-S4A               | 2.284        | 2.120     | 0.370 | 0.642 |       |                       | 2.149     | 0.370 | 0.694 |       |        |
| Fe3-SG                | 2.471        | 2.120     | 0.370 | 0.387 | 2.101 | 0.101                 | 2.149     | 0.370 | 0.419 | 2.272 | -0.728 |
| Fe4-S1                | 2.365        | 2.120     | 0.370 | 0.516 |       |                       | 2.149     | 0.370 | 0.558 |       |        |
| Fe4-S3A               | 2.249        | 2.120     | 0.370 | 0.706 |       |                       | 2.149     | 0.370 | 0.763 |       |        |
| Fe4-S4A               | 2.262        | 2.120     | 0.370 | 0.681 |       |                       | 2.149     | 0.370 | 0.737 |       |        |

|         |       |       |       |       |        |        |       |       |       |        |        |
|---------|-------|-------|-------|-------|--------|--------|-------|-------|-------|--------|--------|
| Fe4-SG  | 2.455 | 2.120 | 0.370 | 0.404 | 2.307  | 0.307  | 2.149 | 0.370 | 0.437 | 2.495  | -0.505 |
| Fe5-S1  | 2.425 | 2.120 | 0.370 | 0.439 |        |        | 2.149 | 0.370 | 0.474 |        |        |
| Fe5-S2B | 2.307 | 2.120 | 0.370 | 0.603 |        |        | 2.149 | 0.370 | 0.652 |        |        |
| Fe5-S4B | 2.253 | 2.120 | 0.370 | 0.698 |        |        | 2.149 | 0.370 | 0.755 |        |        |
| Fe5-SG  | 2.317 | 2.120 | 0.370 | 0.587 | 2.327  | 0.327  | 2.149 | 0.370 | 0.635 | 2.517  | -0.483 |
| Fe6-S1  | 2.511 | 2.120 | 0.370 | 0.348 |        |        | 2.149 | 0.370 | 0.376 |        |        |
| Fe6-S2B | 2.321 | 2.120 | 0.370 | 0.581 |        |        | 2.149 | 0.370 | 0.628 |        |        |
| Fe6-S3B | 2.308 | 2.120 | 0.370 | 0.602 |        |        | 2.149 | 0.370 | 0.651 |        |        |
| Fe6-SG  | 2.433 | 2.120 | 0.370 | 0.429 | 1.959  | -0.041 | 2.149 | 0.370 | 0.464 | 2.119  | -0.881 |
| Fe7-S2B | 2.327 | 2.120 | 0.370 | 0.572 |        |        | 2.149 | 0.370 | 0.618 |        |        |
| Fe7-S3B | 2.356 | 2.120 | 0.370 | 0.528 |        |        | 2.149 | 0.370 | 0.572 |        |        |
| Fe7-S4B | 2.352 | 2.120 | 0.370 | 0.534 |        |        | 2.149 | 0.370 | 0.578 |        |        |
| Fe7-SG  | 2.426 | 2.120 | 0.370 | 0.437 | 2.071  | 0.071  | 2.149 | 0.370 | 0.473 | 2.240  | -0.760 |
| Fe8-S1  | 2.450 | 2.120 | 0.370 | 0.410 |        |        | 2.149 | 0.370 | 0.443 |        |        |
| Fe8-S3B | 2.358 | 2.120 | 0.370 | 0.526 |        |        | 2.149 | 0.370 | 0.568 |        |        |
| Fe8-S4B | 2.248 | 2.120 | 0.370 | 0.708 |        |        | 2.149 | 0.370 | 0.765 |        |        |
| Fe8-SG  | 2.491 | 2.120 | 0.370 | 0.367 | 2.010  | 0.010  | 2.149 | 0.370 | 0.397 | 2.174  | -0.826 |
|         |       |       |       |       | 17.197 |        |       |       |       | 18.599 |        |

**Table S91** The adopted bond valence analyses for irons in P-cluster [1] from MoFe protein 7JRF which is reported as P<sup>N</sup> at 1.33 Å resolution.

| Bond                  | $r_{ij}$ (Å) | $R_0$ (Å) | B (Å) | Bval  | Sum   | Diff.                 | $R_0$ (Å) | B (Å) | Bval  | Sum   | Diff.  |
|-----------------------|--------------|-----------|-------|-------|-------|-----------------------|-----------|-------|-------|-------|--------|
| expected valence = +2 |              |           |       |       |       | expected valence = +3 |           |       |       |       |        |
| Fe1-S1                | 2.473        | 2.120     | 0.370 | 0.385 |       |                       | 2.149     | 0.370 | 0.417 |       |        |
| Fe1-S2A               | 2.309        | 2.120     | 0.370 | 0.600 |       |                       | 2.149     | 0.370 | 0.649 |       |        |
| Fe1-S3A               | 2.256        | 2.120     | 0.370 | 0.692 |       |                       | 2.149     | 0.370 | 0.749 |       |        |
| Fe1-SG                | 2.361        | 2.120     | 0.370 | 0.521 | 2.199 | 0.199                 | 2.149     | 0.370 | 0.564 | 2.378 | -0.622 |
| Fe2-S1                | 2.440        | 2.120     | 0.370 | 0.421 |       |                       | 2.149     | 0.370 | 0.455 |       |        |
| Fe2-S2A               | 2.323        | 2.120     | 0.370 | 0.578 |       |                       | 2.149     | 0.370 | 0.625 |       |        |
| Fe2-S4A               | 2.311        | 2.120     | 0.370 | 0.597 |       |                       | 2.149     | 0.370 | 0.645 |       |        |
| Fe2-SG                | 2.294        | 2.120     | 0.370 | 0.625 | 2.220 | 0.220                 | 2.149     | 0.370 | 0.676 | 2.401 | -0.599 |
| Fe3-S2A               | 2.304        | 2.120     | 0.370 | 0.608 |       |                       | 2.149     | 0.370 | 0.658 |       |        |
| Fe3-S3A               | 2.268        | 2.120     | 0.370 | 0.670 |       |                       | 2.149     | 0.370 | 0.725 |       |        |
| Fe3-S4A               | 2.332        | 2.120     | 0.370 | 0.564 |       |                       | 2.149     | 0.370 | 0.610 |       |        |
| Fe3-SG                | 2.306        | 2.120     | 0.370 | 0.605 | 2.447 | 0.447                 | 2.149     | 0.370 | 0.654 | 2.647 | -0.353 |
| Fe4-S1                | 2.390        | 2.120     | 0.370 | 0.482 |       |                       | 2.149     | 0.370 | 0.521 |       |        |
| Fe4-S3A               | 2.271        | 2.120     | 0.370 | 0.665 |       |                       | 2.149     | 0.370 | 0.719 |       |        |
| Fe4-S4A               | 2.288        | 2.120     | 0.370 | 0.635 |       |                       | 2.149     | 0.370 | 0.687 |       |        |
| Fe4-SG                | 2.340        | 2.120     | 0.370 | 0.552 | 2.334 | 0.334                 | 2.149     | 0.370 | 0.597 | 2.524 | -0.476 |

|         |       |       |       |       |        |       |       |       |       |        |        |
|---------|-------|-------|-------|-------|--------|-------|-------|-------|-------|--------|--------|
| Fe5-S1  | 2.431 | 2.120 | 0.370 | 0.431 |        |       | 2.149 | 0.370 | 0.467 |        |        |
| Fe5-S2B | 2.323 | 2.120 | 0.370 | 0.578 |        |       | 2.149 | 0.370 | 0.625 |        |        |
| Fe5-S4B | 2.305 | 2.120 | 0.370 | 0.607 |        |       | 2.149 | 0.370 | 0.656 |        |        |
| Fe5-SG  | 2.379 | 2.120 | 0.370 | 0.497 | 2.112  | 0.112 | 2.149 | 0.370 | 0.537 | 2.285  | -0.715 |
| Fe6-S1  | 2.460 | 2.120 | 0.370 | 0.399 |        |       | 2.149 | 0.370 | 0.431 |        |        |
| Fe6-S2B | 2.347 | 2.120 | 0.370 | 0.541 |        |       | 2.149 | 0.370 | 0.586 |        |        |
| Fe6-S3B | 2.329 | 2.120 | 0.370 | 0.568 |        |       | 2.149 | 0.370 | 0.615 |        |        |
| Fe6-SG  | 2.318 | 2.120 | 0.370 | 0.586 | 2.094  | 0.094 | 2.149 | 0.370 | 0.633 | 2.265  | -0.735 |
| Fe7-S2B | 2.361 | 2.120 | 0.370 | 0.521 |        |       | 2.149 | 0.370 | 0.564 |        |        |
| Fe7-S3B | 2.326 | 2.120 | 0.370 | 0.573 |        |       | 2.149 | 0.370 | 0.620 |        |        |
| Fe7-S4B | 2.341 | 2.120 | 0.370 | 0.550 |        |       | 2.149 | 0.370 | 0.595 |        |        |
| Fe7-SG  | 2.328 | 2.120 | 0.370 | 0.570 | 2.215  | 0.215 | 2.149 | 0.370 | 0.616 | 2.395  | -0.605 |
| Fe8-S1  | 2.452 | 2.120 | 0.370 | 0.408 |        |       | 2.149 | 0.370 | 0.441 |        |        |
| Fe8-S3B | 2.304 | 2.120 | 0.370 | 0.608 |        |       | 2.149 | 0.370 | 0.658 |        |        |
| Fe8-S4B | 2.272 | 2.120 | 0.370 | 0.663 |        |       | 2.149 | 0.370 | 0.717 |        |        |
| Fe8-SG  | 2.322 | 2.120 | 0.370 | 0.579 | 2.258  | 0.258 | 2.149 | 0.370 | 0.627 | 2.442  | -0.558 |
|         |       |       |       |       | 17.880 |       |       |       |       | 19.338 |        |

**Table S92** The adopted bond valence analyses for irons in P-cluster [2] from MoFe protein 7JRF which is reported as P<sup>N</sup> at 1.33 Å resolution.

| Bond                  | $r_{ij}$ (Å) | $R_0$ (Å) | B (Å) | Bval  | Sum   | Diff.                 | $R_0$ (Å) | B (Å) | Bval  | Sum   | Diff.  |
|-----------------------|--------------|-----------|-------|-------|-------|-----------------------|-----------|-------|-------|-------|--------|
| expected valence = +2 |              |           |       |       |       | expected valence = +3 |           |       |       |       |        |
| Fe1-S1                | 2.490        | 2.120     | 0.370 | 0.368 |       |                       | 2.149     | 0.370 | 0.398 |       |        |
| Fe1-S2A               | 2.301        | 2.120     | 0.370 | 0.613 |       |                       | 2.149     | 0.370 | 0.663 |       |        |
| Fe1-S3A               | 2.273        | 2.120     | 0.370 | 0.661 |       |                       | 2.149     | 0.370 | 0.715 |       |        |
| Fe1-SG                | 2.353        | 2.120     | 0.370 | 0.533 | 2.175 | 0.175                 | 2.149     | 0.370 | 0.576 | 2.352 | -0.648 |
| Fe2-S1                | 2.441        | 2.120     | 0.370 | 0.420 |       |                       | 2.149     | 0.370 | 0.454 |       |        |
| Fe2-S2A               | 2.334        | 2.120     | 0.370 | 0.561 |       |                       | 2.149     | 0.370 | 0.607 |       |        |
| Fe2-S4A               | 2.299        | 2.120     | 0.370 | 0.616 |       |                       | 2.149     | 0.370 | 0.667 |       |        |
| Fe2-SG                | 2.310        | 2.120     | 0.370 | 0.598 | 2.196 | 0.196                 | 2.149     | 0.370 | 0.647 | 2.375 | -0.625 |
| Fe3-S2A               | 2.307        | 2.120     | 0.370 | 0.603 |       |                       | 2.149     | 0.370 | 0.652 |       |        |
| Fe3-S3A               | 2.253        | 2.120     | 0.370 | 0.698 |       |                       | 2.149     | 0.370 | 0.755 |       |        |
| Fe3-S4A               | 2.346        | 2.120     | 0.370 | 0.543 |       |                       | 2.149     | 0.370 | 0.587 |       |        |
| Fe3-SG                | 2.312        | 2.120     | 0.370 | 0.595 | 2.439 | 0.439                 | 2.149     | 0.370 | 0.644 | 2.638 | -0.362 |
| Fe4-S1                | 2.396        | 2.120     | 0.370 | 0.474 |       |                       | 2.149     | 0.370 | 0.513 |       |        |
| Fe4-S3A               | 2.278        | 2.120     | 0.370 | 0.652 |       |                       | 2.149     | 0.370 | 0.706 |       |        |
| Fe4-S4A               | 2.272        | 2.120     | 0.370 | 0.663 |       |                       | 2.149     | 0.370 | 0.717 |       |        |



|         |       |       |       |       |        |       |       |       |       |        |        |
|---------|-------|-------|-------|-------|--------|-------|-------|-------|-------|--------|--------|
| Fe4-SG  | 2.331 | 2.120 | 0.370 | 0.565 | 2.355  | 0.355 | 2.149 | 0.370 | 0.611 | 2.547  | -0.453 |
| Fe5-S1  | 2.429 | 2.120 | 0.370 | 0.434 |        |       | 2.149 | 0.370 | 0.469 |        |        |
| Fe5-S2B | 2.336 | 2.120 | 0.370 | 0.558 |        |       | 2.149 | 0.370 | 0.603 |        |        |
| Fe5-S4B | 2.283 | 2.120 | 0.370 | 0.644 |        |       | 2.149 | 0.370 | 0.696 |        |        |
| Fe5-SG  | 2.365 | 2.120 | 0.370 | 0.516 | 2.151  | 0.151 | 2.149 | 0.370 | 0.558 | 2.326  | -0.674 |
| Fe6-S1  | 2.462 | 2.120 | 0.370 | 0.397 |        |       | 2.149 | 0.370 | 0.429 |        |        |
| Fe6-S2B | 2.360 | 2.120 | 0.370 | 0.523 |        |       | 2.149 | 0.370 | 0.565 |        |        |
| Fe6-S3B | 2.313 | 2.120 | 0.370 | 0.594 |        |       | 2.149 | 0.370 | 0.642 |        |        |
| Fe6-SG  | 2.317 | 2.120 | 0.370 | 0.587 | 2.100  | 0.100 | 2.149 | 0.370 | 0.635 | 2.272  | -0.728 |
| Fe7-S2B | 2.376 | 2.120 | 0.370 | 0.501 |        |       | 2.149 | 0.370 | 0.541 |        |        |
| Fe7-S3B | 2.327 | 2.120 | 0.370 | 0.572 |        |       | 2.149 | 0.370 | 0.618 |        |        |
| Fe7-S4B | 2.345 | 2.120 | 0.370 | 0.544 |        |       | 2.149 | 0.370 | 0.589 |        |        |
| Fe7-SG  | 2.319 | 2.120 | 0.370 | 0.584 | 2.201  | 0.201 | 2.149 | 0.370 | 0.632 | 2.380  | -0.620 |
| Fe8-S1  | 2.447 | 2.120 | 0.370 | 0.413 |        |       | 2.149 | 0.370 | 0.447 |        |        |
| Fe8-S3B | 2.325 | 2.120 | 0.370 | 0.575 |        |       | 2.149 | 0.370 | 0.621 |        |        |
| Fe8-S4B | 2.268 | 2.120 | 0.370 | 0.670 |        |       | 2.149 | 0.370 | 0.725 |        |        |
| Fe8-SG  | 2.301 | 2.120 | 0.370 | 0.613 | 2.271  | 0.271 | 2.149 | 0.370 | 0.663 | 2.456  | -0.544 |
|         |       |       |       |       | 17.888 |       |       |       |       | 19.347 |        |

**Table S93** The adopted bond valence analyses for irons in P-cluster [1] from VFe protein 5N6Y which is reported as P<sup>N</sup> at 1.35 Å resolution.

| Bond                  | $r_{ij}$ (Å) | $R_0$ (Å) | B (Å) | Bval  | Sum   | Diff.                 | $R_0$ (Å) | B (Å) | Bval  | Sum   | Diff.  |
|-----------------------|--------------|-----------|-------|-------|-------|-----------------------|-----------|-------|-------|-------|--------|
| expected valence = +2 |              |           |       |       |       | expected valence = +3 |           |       |       |       |        |
| Fe1-S1                | 2.443        | 2.120     | 0.370 | 0.418 |       |                       | 2.149     | 0.370 | 0.452 |       |        |
| Fe1-S2A               | 2.299        | 2.120     | 0.370 | 0.616 |       |                       | 2.149     | 0.370 | 0.667 |       |        |
| Fe1-S3A               | 2.277        | 2.120     | 0.370 | 0.654 |       |                       | 2.149     | 0.370 | 0.708 |       |        |
| Fe1-SG                | 2.334        | 2.120     | 0.370 | 0.561 | 2.249 | 0.249                 | 2.149     | 0.370 | 0.607 | 2.433 | -0.567 |
| Fe2-S1                | 2.486        | 2.120     | 0.370 | 0.372 |       |                       | 2.149     | 0.370 | 0.402 |       |        |
| Fe2-S2A               | 2.268        | 2.120     | 0.370 | 0.670 |       |                       | 2.149     | 0.370 | 0.725 |       |        |
| Fe2-S4A               | 2.288        | 2.120     | 0.370 | 0.635 |       |                       | 2.149     | 0.370 | 0.687 |       |        |
| Fe2-SG                | 2.401        | 2.120     | 0.370 | 0.468 | 2.145 | 0.145                 | 2.149     | 0.370 | 0.506 | 2.320 | -0.680 |
| Fe3-S2A               | 2.321        | 2.120     | 0.370 | 0.581 |       |                       | 2.149     | 0.370 | 0.628 |       |        |
| Fe3-S3A               | 2.319        | 2.120     | 0.370 | 0.584 |       |                       | 2.149     | 0.370 | 0.632 |       |        |
| Fe3-S4A               | 2.275        | 2.120     | 0.370 | 0.658 |       |                       | 2.149     | 0.370 | 0.711 |       |        |
| Fe3-SG                | 2.303        | 2.120     | 0.370 | 0.610 | 2.432 | 0.432                 | 2.149     | 0.370 | 0.660 | 2.631 | -0.369 |
| Fe4-S1                | 2.421        | 2.120     | 0.370 | 0.443 |       |                       | 2.149     | 0.370 | 0.479 |       |        |
| Fe4-S3A               | 2.251        | 2.120     | 0.370 | 0.702 |       |                       | 2.149     | 0.370 | 0.759 |       |        |
| Fe4-S4A               | 2.273        | 2.120     | 0.370 | 0.661 |       |                       | 2.149     | 0.370 | 0.715 |       |        |

|         |       |       |       |       |        |       |       |       |       |        |        |
|---------|-------|-------|-------|-------|--------|-------|-------|-------|-------|--------|--------|
| Fe4-SG  | 2.364 | 2.120 | 0.370 | 0.517 | 2.324  | 0.324 | 2.149 | 0.370 | 0.559 | 2.513  | -0.487 |
| Fe5-S1  | 2.465 | 2.120 | 0.370 | 0.394 |        |       | 2.149 | 0.370 | 0.426 |        |        |
| Fe5-S2B | 2.252 | 2.120 | 0.370 | 0.700 |        |       | 2.149 | 0.370 | 0.757 |        |        |
| Fe5-S4B | 2.262 | 2.120 | 0.370 | 0.681 |        |       | 2.149 | 0.370 | 0.737 |        |        |
| Fe5-SG  | 2.358 | 2.120 | 0.370 | 0.526 | 2.300  | 0.300 | 2.149 | 0.370 | 0.568 | 2.488  | -0.512 |
| Fe6-S1  | 2.527 | 2.120 | 0.370 | 0.333 |        |       | 2.149 | 0.370 | 0.360 |        |        |
| Fe6-S2B | 2.344 | 2.120 | 0.370 | 0.546 |        |       | 2.149 | 0.370 | 0.590 |        |        |
| Fe6-S3B | 2.304 | 2.120 | 0.370 | 0.608 |        |       | 2.149 | 0.370 | 0.658 |        |        |
| Fe6-SG  | 2.258 | 2.120 | 0.370 | 0.689 | 2.176  | 0.176 | 2.149 | 0.370 | 0.745 | 2.353  | -0.647 |
| Fe7-S2B | 2.313 | 2.120 | 0.370 | 0.594 |        |       | 2.149 | 0.370 | 0.642 |        |        |
| Fe7-S3B | 2.297 | 2.120 | 0.370 | 0.620 |        |       | 2.149 | 0.370 | 0.670 |        |        |
| Fe7-S4B | 2.284 | 2.120 | 0.370 | 0.642 |        |       | 2.149 | 0.370 | 0.694 |        |        |
| Fe7-SG  | 2.276 | 2.120 | 0.370 | 0.656 | 2.511  | 0.511 | 2.149 | 0.370 | 0.709 | 2.716  | -0.284 |
| Fe8-S1  | 2.397 | 2.120 | 0.370 | 0.473 |        |       | 2.149 | 0.370 | 0.512 |        |        |
| Fe8-S3B | 2.249 | 2.120 | 0.370 | 0.706 |        |       | 2.149 | 0.370 | 0.763 |        |        |
| Fe8-S4B | 2.275 | 2.120 | 0.370 | 0.658 |        |       | 2.149 | 0.370 | 0.711 |        |        |
| Fe8-SG  | 2.294 | 2.120 | 0.370 | 0.625 | 2.461  | 0.461 | 2.149 | 0.370 | 0.676 | 2.662  | -0.338 |
|         |       |       |       |       | 18.599 |       |       |       |       | 20.115 |        |

**Table S94** The adopted bond valence analyses for irons in P-cluster [2] from VFe protein 5N6Y which is reported as P<sup>N</sup> at 1.35 Å resolution.

| Bond                  | $r_{ij}$ (Å) | $R_0$ (Å) | B (Å) | Bval  | Sum   | Diff.                 | $R_0$ (Å) | B (Å) | Bval  | Sum   | Diff.  |
|-----------------------|--------------|-----------|-------|-------|-------|-----------------------|-----------|-------|-------|-------|--------|
| expected valence = +2 |              |           |       |       |       | expected valence = +3 |           |       |       |       |        |
| Fe1-S1                | 2.459        | 2.120     | 0.370 | 0.400 |       |                       | 2.149     | 0.370 | 0.433 |       |        |
| Fe1-S2A               | 2.300        | 2.120     | 0.370 | 0.615 |       |                       | 2.149     | 0.370 | 0.665 |       |        |
| Fe1-S3A               | 2.313        | 2.120     | 0.370 | 0.594 |       |                       | 2.149     | 0.370 | 0.642 |       |        |
| Fe1-SG                | 2.319        | 2.120     | 0.370 | 0.584 | 2.192 | 0.192                 | 2.149     | 0.370 | 0.632 | 2.371 | -0.629 |
| Fe2-S1                | 2.493        | 2.120     | 0.370 | 0.365 |       |                       | 2.149     | 0.370 | 0.395 |       |        |
| Fe2-S2A               | 2.295        | 2.120     | 0.370 | 0.623 |       |                       | 2.149     | 0.370 | 0.674 |       |        |
| Fe2-S4A               | 2.302        | 2.120     | 0.370 | 0.611 |       |                       | 2.149     | 0.370 | 0.661 |       |        |
| Fe2-SG                | 2.331        | 2.120     | 0.370 | 0.565 | 2.165 | 0.165                 | 2.149     | 0.370 | 0.611 | 2.341 | -0.659 |
| Fe3-S2A               | 2.318        | 2.120     | 0.370 | 0.586 |       |                       | 2.149     | 0.370 | 0.633 |       |        |
| Fe3-S3A               | 2.351        | 2.120     | 0.370 | 0.536 |       |                       | 2.149     | 0.370 | 0.579 |       |        |
| Fe3-S4A               | 2.287        | 2.120     | 0.370 | 0.637 |       |                       | 2.149     | 0.370 | 0.689 |       |        |
| Fe3-SG                | 2.323        | 2.120     | 0.370 | 0.578 | 2.336 | 0.336                 | 2.149     | 0.370 | 0.625 | 2.526 | -0.474 |
| Fe4-S1                | 2.421        | 2.120     | 0.370 | 0.443 |       |                       | 2.149     | 0.370 | 0.479 |       |        |
| Fe4-S3A               | 2.293        | 2.120     | 0.370 | 0.627 |       |                       | 2.149     | 0.370 | 0.678 |       |        |
| Fe4-S4A               | 2.289        | 2.120     | 0.370 | 0.633 |       |                       | 2.149     | 0.370 | 0.685 |       |        |

|         |       |       |       |       |        |       |       |       |       |        |        |
|---------|-------|-------|-------|-------|--------|-------|-------|-------|-------|--------|--------|
| Fe4-SG  | 2.331 | 2.120 | 0.370 | 0.565 | 2.269  | 0.269 | 2.149 | 0.370 | 0.611 | 2.453  | -0.547 |
| Fe5-S1  | 2.453 | 2.120 | 0.370 | 0.407 |        |       | 2.149 | 0.370 | 0.440 |        |        |
| Fe5-S2B | 2.290 | 2.120 | 0.370 | 0.632 |        |       | 2.149 | 0.370 | 0.683 |        |        |
| Fe5-S4B | 2.287 | 2.120 | 0.370 | 0.637 |        |       | 2.149 | 0.370 | 0.689 |        |        |
| Fe5-SG  | 2.318 | 2.120 | 0.370 | 0.586 | 2.261  | 0.261 | 2.149 | 0.370 | 0.633 | 2.445  | -0.555 |
| Fe6-S1  | 2.552 | 2.120 | 0.370 | 0.311 |        |       | 2.149 | 0.370 | 0.336 |        |        |
| Fe6-S2B | 2.339 | 2.120 | 0.370 | 0.553 |        |       | 2.149 | 0.370 | 0.598 |        |        |
| Fe6-S3B | 2.310 | 2.120 | 0.370 | 0.598 |        |       | 2.149 | 0.370 | 0.647 |        |        |
| Fe6-SG  | 2.278 | 2.120 | 0.370 | 0.652 | 2.115  | 0.115 | 2.149 | 0.370 | 0.706 | 2.288  | -0.712 |
| Fe7-S2B | 2.315 | 2.120 | 0.370 | 0.590 |        |       | 2.149 | 0.370 | 0.638 |        |        |
| Fe7-S3B | 2.293 | 2.120 | 0.370 | 0.627 |        |       | 2.149 | 0.370 | 0.678 |        |        |
| Fe7-S4B | 2.289 | 2.120 | 0.370 | 0.633 |        |       | 2.149 | 0.370 | 0.685 |        |        |
| Fe7-SG  | 2.310 | 2.120 | 0.370 | 0.598 | 2.449  | 0.449 | 2.149 | 0.370 | 0.647 | 2.648  | -0.352 |
| Fe8-S1  | 2.398 | 2.120 | 0.370 | 0.472 |        |       | 2.149 | 0.370 | 0.510 |        |        |
| Fe8-S3B | 2.279 | 2.120 | 0.370 | 0.651 |        |       | 2.149 | 0.370 | 0.704 |        |        |
| Fe8-S4B | 2.265 | 2.120 | 0.370 | 0.676 |        |       | 2.149 | 0.370 | 0.731 |        |        |
| Fe8-SG  | 2.290 | 2.120 | 0.370 | 0.632 | 2.430  | 0.430 | 2.149 | 0.370 | 0.683 | 2.628  | -0.372 |
|         |       |       |       |       | 18.216 |       |       |       |       | 19.701 |        |

**Table S95** The adopted bond valence analyses for irons in P<sup>N</sup> [1] from VFe protein 6FEA which was reported as superposition of P<sup>N/1+</sup> at 1.2 Å resolution.

| Bond                  | $r_{ij}$ (Å) | $R_0$ (Å) | B (Å) | Bval  | Sum   | Diff.                 | $R_0$ (Å) | B (Å) | Bval  | Sum   | Diff.  |
|-----------------------|--------------|-----------|-------|-------|-------|-----------------------|-----------|-------|-------|-------|--------|
| expected valence = +2 |              |           |       |       |       | expected valence = +3 |           |       |       |       |        |
| Fe1-S1                | 2.425        | 2.120     | 0.370 | 0.439 |       |                       | 2.149     | 0.370 | 0.474 |       |        |
| Fe1-S2A               | 2.332        | 2.120     | 0.370 | 0.564 |       |                       | 2.149     | 0.370 | 0.610 |       |        |
| Fe1-S4A               | 2.312        | 2.120     | 0.370 | 0.595 |       |                       | 2.149     | 0.370 | 0.644 |       |        |
| Fe1-SG                | 2.336        | 2.120     | 0.370 | 0.558 | 2.155 | 0.155                 | 2.149     | 0.370 | 0.603 | 2.331 | -0.669 |
| Fe2-S1                | 2.485        | 2.120     | 0.370 | 0.373 |       |                       | 2.149     | 0.370 | 0.403 |       |        |
| Fe2-S2A               | 2.301        | 2.120     | 0.370 | 0.613 |       |                       | 2.149     | 0.370 | 0.663 |       |        |
| Fe2-S3A               | 2.292        | 2.120     | 0.370 | 0.628 |       |                       | 2.149     | 0.370 | 0.679 |       |        |
| Fe2-SG                | 2.385        | 2.120     | 0.370 | 0.489 | 2.103 | 0.103                 | 2.149     | 0.370 | 0.528 | 2.274 | -0.726 |
| Fe3-S2A               | 2.345        | 2.120     | 0.370 | 0.544 |       |                       | 2.149     | 0.370 | 0.589 |       |        |
| Fe3-S3A               | 2.337        | 2.120     | 0.370 | 0.556 |       |                       | 2.149     | 0.370 | 0.602 |       |        |
| Fe3-S4A               | 2.288        | 2.120     | 0.370 | 0.635 |       |                       | 2.149     | 0.370 | 0.687 |       |        |
| Fe3-SG                | 2.304        | 2.120     | 0.370 | 0.608 | 2.344 | 0.344                 | 2.149     | 0.370 | 0.658 | 2.535 | -0.465 |
| Fe4-S1                | 2.413        | 2.120     | 0.370 | 0.453 |       |                       | 2.149     | 0.370 | 0.490 |       |        |
| Fe4-S3A               | 2.292        | 2.120     | 0.370 | 0.628 |       |                       | 2.149     | 0.370 | 0.679 |       |        |
| Fe4-S4A               | 2.268        | 2.120     | 0.370 | 0.670 |       |                       | 2.149     | 0.370 | 0.725 |       |        |

|                          |       |       |       |       |                          |       |       |       |       |                          |        |
|--------------------------|-------|-------|-------|-------|--------------------------|-------|-------|-------|-------|--------------------------|--------|
| Fe4-SG                   | 2.329 | 2.120 | 0.370 | 0.568 | 2.320                    | 0.320 | 2.149 | 0.370 | 0.615 | 2.509                    | -0.491 |
| Fe5-S1                   | 2.464 | 2.120 | 0.370 | 0.395 |                          |       | 2.149 | 0.370 | 0.427 |                          |        |
| Fe5-S2B                  | 2.286 | 2.120 | 0.370 | 0.638 |                          |       | 2.149 | 0.370 | 0.691 |                          |        |
| Fe5-S4B                  | 2.288 | 2.120 | 0.370 | 0.635 |                          |       | 2.149 | 0.370 | 0.687 |                          |        |
| Fe5-SG                   | 2.345 | 2.120 | 0.370 | 0.544 | 2.213                    | 0.213 | 2.149 | 0.370 | 0.589 | 2.393                    | -0.607 |
| Fe6-S1(P <sup>N</sup> )  | 2.439 | 2.120 | 0.370 | 0.422 |                          |       | 2.149 | 0.370 | 0.457 |                          |        |
| Fe6-S2B(P <sup>N</sup> ) | 2.403 | 2.120 | 0.370 | 0.465 |                          |       | 2.149 | 0.370 | 0.503 |                          |        |
| Fe6-S3B(P <sup>N</sup> ) | 2.356 | 2.120 | 0.370 | 0.528 |                          |       | 2.149 | 0.370 | 0.572 |                          |        |
| Fe6-SG(P <sup>N</sup> )  | 2.291 | 2.120 | 0.370 | 0.630 | 2.046 (P <sup>N</sup> )  | 0.046 | 2.149 | 0.370 | 0.681 | 2.213 (P <sup>N</sup> )  | -0.787 |
| Fe7-S2B                  | 2.329 | 2.120 | 0.370 | 0.568 |                          |       | 2.149 | 0.370 | 0.615 |                          |        |
| Fe7-S3B                  | 2.301 | 2.120 | 0.370 | 0.613 |                          |       | 2.149 | 0.370 | 0.663 |                          |        |
| Fe7-S4B                  | 2.288 | 2.120 | 0.370 | 0.635 |                          |       | 2.149 | 0.370 | 0.687 |                          |        |
| Fe7-SG                   | 2.296 | 2.120 | 0.370 | 0.621 | 2.438                    | 0.438 | 2.149 | 0.370 | 0.672 | 2.637                    | -0.363 |
| Fe8-S1                   | 2.423 | 2.120 | 0.370 | 0.441 |                          |       | 2.149 | 0.370 | 0.477 |                          |        |
| Fe8-S3B                  | 2.279 | 2.120 | 0.370 | 0.651 |                          |       | 2.149 | 0.370 | 0.704 |                          |        |
| Fe8-S4B                  | 2.262 | 2.120 | 0.370 | 0.681 |                          |       | 2.149 | 0.370 | 0.737 |                          |        |
| Fe8-SG                   | 2.286 | 2.120 | 0.370 | 0.638 | 2.411                    | 0.411 | 2.149 | 0.370 | 0.691 | 2.608                    | -0.392 |
|                          |       |       |       |       | 18.030 (P <sup>N</sup> ) |       |       |       |       | 19.500 (P <sup>N</sup> ) |        |

---

**Table S96** The adopted bond valence analyses for irons in P<sup>N</sup> [2] from VFe protein 6FEA which was reported as superposition of P<sup>N/l+</sup> at 1.2 Å resolution.

| Bond                  | $r_{ij}$ (Å) | $R_0$ (Å) | B (Å) | Bval  | Sum   | Diff.                 | $R_0$ (Å) | B (Å) | Bval  | Sum   | Diff.  |
|-----------------------|--------------|-----------|-------|-------|-------|-----------------------|-----------|-------|-------|-------|--------|
| expected valence = +2 |              |           |       |       |       | expected valence = +3 |           |       |       |       |        |
| Fe1-S1                | 2.438        | 2.120     | 0.370 | 0.423 |       |                       | 2.149     | 0.370 | 0.458 |       |        |
| Fe1-S2A               | 2.317        | 2.120     | 0.370 | 0.587 |       |                       | 2.149     | 0.370 | 0.635 |       |        |
| Fe1-S4A               | 2.305        | 2.120     | 0.370 | 0.607 |       |                       | 2.149     | 0.370 | 0.656 |       |        |
| Fe1-SG                | 2.332        | 2.120     | 0.370 | 0.564 | 2.181 | 0.181                 | 2.149     | 0.370 | 0.610 | 2.359 | -0.641 |
| Fe2-S1                | 2.497        | 2.120     | 0.370 | 0.361 |       |                       | 2.149     | 0.370 | 0.390 |       |        |
| Fe2-S2A               | 2.289        | 2.120     | 0.370 | 0.633 |       |                       | 2.149     | 0.370 | 0.685 |       |        |
| Fe2-S3A               | 2.285        | 2.120     | 0.370 | 0.640 |       |                       | 2.149     | 0.370 | 0.692 |       |        |
| Fe2-SG                | 2.397        | 2.120     | 0.370 | 0.473 | 2.108 | 0.108                 | 2.149     | 0.370 | 0.512 | 2.279 | -0.721 |
| Fe3-S2A               | 2.314        | 2.120     | 0.370 | 0.592 |       |                       | 2.149     | 0.370 | 0.640 |       |        |
| Fe3-S3A               | 2.340        | 2.120     | 0.370 | 0.552 |       |                       | 2.149     | 0.370 | 0.597 |       |        |
| Fe3-S4A               | 2.294        | 2.120     | 0.370 | 0.625 |       |                       | 2.149     | 0.370 | 0.676 |       |        |
| Fe3-SG                | 2.300        | 2.120     | 0.370 | 0.615 | 2.383 | 0.383                 | 2.149     | 0.370 | 0.665 | 2.578 | -0.422 |
| Fe4-S1                | 2.412        | 2.120     | 0.370 | 0.454 |       |                       | 2.149     | 0.370 | 0.491 |       |        |
| Fe4-S3A               | 2.285        | 2.120     | 0.370 | 0.640 |       |                       | 2.149     | 0.370 | 0.692 |       |        |
| Fe4-S4A               | 2.272        | 2.120     | 0.370 | 0.663 |       |                       | 2.149     | 0.370 | 0.717 |       |        |



|                          |       |       |       |       |                          |       |       |       |       |                          |        |
|--------------------------|-------|-------|-------|-------|--------------------------|-------|-------|-------|-------|--------------------------|--------|
| Fe4-SG                   | 2.350 | 2.120 | 0.370 | 0.537 | 2.295                    | 0.295 | 2.149 | 0.370 | 0.581 | 2.482                    | -0.518 |
| Fe5-S1                   | 2.452 | 2.120 | 0.370 | 0.408 |                          |       | 2.149 | 0.370 | 0.441 |                          |        |
| Fe5-S2B                  | 2.290 | 2.120 | 0.370 | 0.632 |                          |       | 2.149 | 0.370 | 0.683 |                          |        |
| Fe5-S4B                  | 2.270 | 2.120 | 0.370 | 0.667 |                          |       | 2.149 | 0.370 | 0.721 |                          |        |
| Fe5-SG                   | 2.343 | 2.120 | 0.370 | 0.547 | 2.253                    | 0.253 | 2.149 | 0.370 | 0.592 | 2.437                    | -0.563 |
| Fe6-S1(P <sup>N</sup> )  | 2.426 | 2.120 | 0.370 | 0.437 |                          |       | 2.149 | 0.370 | 0.473 |                          |        |
| Fe6-S2B(P <sup>N</sup> ) | 2.393 | 2.120 | 0.370 | 0.478 |                          |       | 2.149 | 0.370 | 0.517 |                          |        |
| Fe6-S3B(P <sup>N</sup> ) | 2.346 | 2.120 | 0.370 | 0.543 |                          |       | 2.149 | 0.370 | 0.587 |                          |        |
| Fe6-SG(P <sup>N</sup> )  | 2.301 | 2.120 | 0.370 | 0.613 | 2.072 (P <sup>N</sup> )  | 0.072 | 2.149 | 0.370 | 0.663 | 2.240 (P <sup>N</sup> )  | -0.760 |
| Fe7-S2B                  | 2.328 | 2.120 | 0.370 | 0.570 |                          |       | 2.149 | 0.370 | 0.616 |                          |        |
| Fe7-S3B                  | 2.298 | 2.120 | 0.370 | 0.618 |                          |       | 2.149 | 0.370 | 0.669 |                          |        |
| Fe7-S4B                  | 2.281 | 2.120 | 0.370 | 0.647 |                          |       | 2.149 | 0.370 | 0.700 |                          |        |
| Fe7-SG                   | 2.296 | 2.120 | 0.370 | 0.621 | 2.457                    | 0.457 | 2.149 | 0.370 | 0.672 | 2.657                    | -0.343 |
| Fe8-S1                   | 2.423 | 2.120 | 0.370 | 0.441 |                          |       | 2.149 | 0.370 | 0.477 |                          |        |
| Fe8-S3B                  | 2.267 | 2.120 | 0.370 | 0.672 |                          |       | 2.149 | 0.370 | 0.727 |                          |        |
| Fe8-S4B                  | 2.268 | 2.120 | 0.370 | 0.670 |                          |       | 2.149 | 0.370 | 0.725 |                          |        |
| Fe8-SG                   | 2.299 | 2.120 | 0.370 | 0.616 | 2.400                    | 0.400 | 2.149 | 0.370 | 0.667 | 2.595                    | -0.405 |
|                          |       |       |       |       | 18.148 (P <sup>N</sup> ) |       |       |       |       | 19.627 (P <sup>N</sup> ) |        |

---

**Table S97** The adopted bond valence analyses for irons in P<sup>N</sup> [1] from VFe protein 7ADR which was reported as superposition of P<sup>N/1+</sup> at 1.0 Å resolution.

| Bond                  | $r_{ij}$ (Å) | $R_0$ (Å) | B (Å) | Bval  | Sum   | Diff.                 | $R_0$ (Å) | B (Å) | Bval  | Sum   | Diff.  |
|-----------------------|--------------|-----------|-------|-------|-------|-----------------------|-----------|-------|-------|-------|--------|
| expected valence = +2 |              |           |       |       |       | expected valence = +3 |           |       |       |       |        |
| Fe1-S1                | 2.432        | 2.120     | 0.370 | 0.430 |       |                       | 2.149     | 0.370 | 0.465 |       |        |
| Fe1-S2A               | 2.336        | 2.120     | 0.370 | 0.558 |       |                       | 2.149     | 0.370 | 0.603 |       |        |
| Fe1-S3A               | 2.308        | 2.120     | 0.370 | 0.602 |       |                       | 2.149     | 0.370 | 0.651 |       |        |
| Fe1-SG                | 2.332        | 2.120     | 0.370 | 0.564 | 2.154 | 0.154                 | 2.149     | 0.370 | 0.610 | 2.329 | -0.671 |
| Fe2-S1                | 2.483        | 2.120     | 0.370 | 0.375 |       |                       | 2.149     | 0.370 | 0.405 |       |        |
| Fe2-S2A               | 2.298        | 2.120     | 0.370 | 0.618 |       |                       | 2.149     | 0.370 | 0.669 |       |        |
| Fe2-S4A               | 2.306        | 2.120     | 0.370 | 0.605 |       |                       | 2.149     | 0.370 | 0.654 |       |        |
| Fe2-SG                | 2.386        | 2.120     | 0.370 | 0.487 | 2.085 | 0.085                 | 2.149     | 0.370 | 0.527 | 2.255 | -0.745 |
| Fe3-S2A               | 2.340        | 2.120     | 0.370 | 0.552 |       |                       | 2.149     | 0.370 | 0.597 |       |        |
| Fe3-S3A               | 2.341        | 2.120     | 0.370 | 0.550 |       |                       | 2.149     | 0.370 | 0.595 |       |        |
| Fe3-S4A               | 2.295        | 2.120     | 0.370 | 0.623 |       |                       | 2.149     | 0.370 | 0.674 |       |        |
| Fe3-SG                | 2.310        | 2.120     | 0.370 | 0.598 | 2.324 | 0.324                 | 2.149     | 0.370 | 0.647 | 2.513 | -0.487 |
| Fe4-S1                | 2.420        | 2.120     | 0.370 | 0.444 |       |                       | 2.149     | 0.370 | 0.481 |       |        |
| Fe4-S3A               | 2.289        | 2.120     | 0.370 | 0.633 |       |                       | 2.149     | 0.370 | 0.685 |       |        |
| Fe4-S4A               | 2.278        | 2.120     | 0.370 | 0.652 |       |                       | 2.149     | 0.370 | 0.706 |       |        |

|                          |       |       |       |       |                          |       |       |       |       |                          |        |
|--------------------------|-------|-------|-------|-------|--------------------------|-------|-------|-------|-------|--------------------------|--------|
| Fe4-SG                   | 2.335 | 2.120 | 0.370 | 0.559 | 2.290                    | 0.290 | 2.149 | 0.370 | 0.605 | 2.476                    | -0.524 |
| Fe5-S1                   | 2.468 | 2.120 | 0.370 | 0.390 |                          |       | 2.149 | 0.370 | 0.422 |                          |        |
| Fe5-S2B                  | 2.298 | 2.120 | 0.370 | 0.618 |                          |       | 2.149 | 0.370 | 0.669 |                          |        |
| Fe5-S4B                  | 2.292 | 2.120 | 0.370 | 0.628 |                          |       | 2.149 | 0.370 | 0.679 |                          |        |
| Fe5-SG                   | 2.344 | 2.120 | 0.370 | 0.546 | 2.183                    | 0.183 | 2.149 | 0.370 | 0.590 | 2.361                    | -0.639 |
| Fe6-S1(P <sup>N</sup> )  | 2.436 | 2.120 | 0.370 | 0.426 |                          |       | 2.149 | 0.370 | 0.460 |                          |        |
| Fe6-S2B(P <sup>N</sup> ) | 2.421 | 2.120 | 0.370 | 0.443 |                          |       | 2.149 | 0.370 | 0.479 |                          |        |
| Fe6-S3B(P <sup>N</sup> ) | 2.381 | 2.120 | 0.370 | 0.494 |                          |       | 2.149 | 0.370 | 0.534 |                          |        |
| Fe6-SG(P <sup>N</sup> )  | 2.259 | 2.120 | 0.370 | 0.687 | 2.050                    | 0.050 | 2.149 | 0.370 | 0.743 | 2.217                    | -0.783 |
| Fe7-S2B                  | 2.332 | 2.120 | 0.370 | 0.564 |                          |       | 2.149 | 0.370 | 0.610 |                          |        |
| Fe7-S3B                  | 2.307 | 2.120 | 0.370 | 0.603 |                          |       | 2.149 | 0.370 | 0.652 |                          |        |
| Fe7-S4B                  | 2.304 | 2.120 | 0.370 | 0.608 |                          |       | 2.149 | 0.370 | 0.658 |                          |        |
| Fe7-SG                   | 2.296 | 2.120 | 0.370 | 0.621 | 2.397                    | 0.397 | 2.149 | 0.370 | 0.672 | 2.592                    | -0.408 |
| Fe8-S1                   | 2.428 | 2.120 | 0.370 | 0.435 |                          |       | 2.149 | 0.370 | 0.470 |                          |        |
| Fe8-S3B                  | 2.279 | 2.120 | 0.370 | 0.651 |                          |       | 2.149 | 0.370 | 0.704 |                          |        |
| Fe8-S4B                  | 2.279 | 2.120 | 0.370 | 0.651 |                          |       | 2.149 | 0.370 | 0.704 |                          |        |
| Fe8-SG                   | 2.292 | 2.120 | 0.370 | 0.628 | 2.365                    | 0.365 | 2.149 | 0.370 | 0.679 | 2.557                    | -0.443 |
|                          |       |       |       |       | 17.846 (P <sup>N</sup> ) |       |       |       |       | 19.301 (P <sup>N</sup> ) |        |

---

**Table S98** The adopted bond valence analyses for irons in P<sup>N</sup> [2] from VFe protein 7ADR which was reported as superposition of P<sup>N/1+</sup> at 1.0 Å resolution.

| Bond                  | $r_{ij}$ (Å) | $R_0$ (Å) | B (Å) | Bval  | Sum   | Diff.                 | $R_0$ (Å) | B (Å) | Bval  | Sum   | Diff.  |
|-----------------------|--------------|-----------|-------|-------|-------|-----------------------|-----------|-------|-------|-------|--------|
| expected valence = +2 |              |           |       |       |       | expected valence = +3 |           |       |       |       |        |
| Fe1-S1                | 2.434        | 2.120     | 0.370 | 0.428 |       |                       | 2.149     | 0.370 | 0.463 |       |        |
| Fe1-S2A               | 2.339        | 2.120     | 0.370 | 0.553 |       |                       | 2.149     | 0.370 | 0.598 |       |        |
| Fe1-S3A               | 2.310        | 2.120     | 0.370 | 0.598 |       |                       | 2.149     | 0.370 | 0.647 |       |        |
| Fe1-SG                | 2.336        | 2.120     | 0.370 | 0.558 | 2.137 | 0.137                 | 2.149     | 0.370 | 0.603 | 2.312 | -0.688 |
| Fe2-S1                | 2.484        | 2.120     | 0.370 | 0.374 |       |                       | 2.149     | 0.370 | 0.404 |       |        |
| Fe2-S2A               | 2.300        | 2.120     | 0.370 | 0.615 |       |                       | 2.149     | 0.370 | 0.665 |       |        |
| Fe2-S4A               | 2.307        | 2.120     | 0.370 | 0.603 |       |                       | 2.149     | 0.370 | 0.652 |       |        |
| Fe2-SG                | 2.385        | 2.120     | 0.370 | 0.489 | 2.081 | 0.081                 | 2.149     | 0.370 | 0.528 | 2.250 | -0.750 |
| Fe3-S2A               | 2.348        | 2.120     | 0.370 | 0.540 |       |                       | 2.149     | 0.370 | 0.584 |       |        |
| Fe3-S3A               | 2.333        | 2.120     | 0.370 | 0.562 |       |                       | 2.149     | 0.370 | 0.608 |       |        |
| Fe3-S4A               | 2.305        | 2.120     | 0.370 | 0.607 |       |                       | 2.149     | 0.370 | 0.656 |       |        |
| Fe3-SG                | 2.305        | 2.120     | 0.370 | 0.607 | 2.315 | 0.315                 | 2.149     | 0.370 | 0.656 | 2.504 | -0.496 |
| Fe4-S1                | 2.421        | 2.120     | 0.370 | 0.443 |       |                       | 2.149     | 0.370 | 0.479 |       |        |
| Fe4-S3A               | 2.292        | 2.120     | 0.370 | 0.628 |       |                       | 2.149     | 0.370 | 0.679 |       |        |
| Fe4-S4A               | 2.285        | 2.120     | 0.370 | 0.640 |       |                       | 2.149     | 0.370 | 0.692 |       |        |

|                          |       |       |       |       |                          |       |       |       |                          |       |        |
|--------------------------|-------|-------|-------|-------|--------------------------|-------|-------|-------|--------------------------|-------|--------|
| Fe4-SG                   | 2.339 | 2.120 | 0.370 | 0.553 | 2.265                    | 0.265 | 2.149 | 0.370 | 0.598                    | 2.450 | -0.550 |
| Fe5-S1                   | 2.459 | 2.120 | 0.370 | 0.400 |                          |       | 2.149 | 0.370 | 0.433                    |       |        |
| Fe5-S2B                  | 2.297 | 2.120 | 0.370 | 0.620 |                          |       | 2.149 | 0.370 | 0.670                    |       |        |
| Fe5-S4B                  | 2.287 | 2.120 | 0.370 | 0.637 |                          |       | 2.149 | 0.370 | 0.689                    |       |        |
| Fe5-SG                   | 2.343 | 2.120 | 0.370 | 0.547 | 2.204                    | 0.204 | 2.149 | 0.370 | 0.592                    | 2.384 | -0.616 |
| Fe6-S1(P <sup>N</sup> )  | 2.433 | 2.120 | 0.370 | 0.429 |                          |       | 2.149 | 0.370 | 0.464                    |       |        |
| Fe6-S2B(P <sup>N</sup> ) | 2.410 | 2.120 | 0.370 | 0.457 |                          |       | 2.149 | 0.370 | 0.494                    |       |        |
| Fe6-S3B(P <sup>N</sup> ) | 2.326 | 2.120 | 0.370 | 0.573 |                          |       | 2.149 | 0.370 | 0.620                    |       |        |
| Fe6-SG(P <sup>N</sup> )  | 2.294 | 2.120 | 0.370 | 0.625 | 2.084                    | 0.084 | 2.149 | 0.370 | 0.676                    | 2.254 | -0.746 |
| Fe7-S2B                  | 2.329 | 2.120 | 0.370 | 0.568 |                          |       | 2.149 | 0.370 | 0.615                    |       |        |
| Fe7-S3B                  | 2.307 | 2.120 | 0.370 | 0.603 |                          |       | 2.149 | 0.370 | 0.652                    |       |        |
| Fe7-S4B                  | 2.304 | 2.120 | 0.370 | 0.608 |                          |       | 2.149 | 0.370 | 0.658                    |       |        |
| Fe7-SG                   | 2.294 | 2.120 | 0.370 | 0.625 | 2.405                    | 0.405 | 2.149 | 0.370 | 0.676                    | 2.601 | -0.399 |
| Fe8-S1                   | 2.425 | 2.120 | 0.370 | 0.439 |                          |       | 2.149 | 0.370 | 0.474                    |       |        |
| Fe8-S3B                  | 2.280 | 2.120 | 0.370 | 0.649 |                          |       | 2.149 | 0.370 | 0.702                    |       |        |
| Fe8-S4B                  | 2.276 | 2.120 | 0.370 | 0.656 |                          |       | 2.149 | 0.370 | 0.709                    |       |        |
| Fe8-SG                   | 2.292 | 2.120 | 0.370 | 0.628 | 2.372                    | 0.372 | 2.149 | 0.370 | 0.679                    | 2.565 | -0.435 |
|                          |       |       |       |       | 17.862 (P <sup>N</sup> ) |       |       |       | 19.319 (P <sup>N</sup> ) |       |        |

---

**Table S99** The adopted bond valence analyses for irons in P<sup>N</sup> [1] from VFe protein 7ADY which was reported as superposition of P<sup>N/1+</sup> at 1.05 Å resolution.

| Bond                  | $r_{ij}$ (Å) | $R_0$ (Å) | B (Å) | Bval  | Sum   | Diff.                 | $R_0$ (Å) | B (Å) | Bval  | Sum   | Diff.  |
|-----------------------|--------------|-----------|-------|-------|-------|-----------------------|-----------|-------|-------|-------|--------|
| expected valence = +2 |              |           |       |       |       | expected valence = +3 |           |       |       |       |        |
| Fe1-S1                | 2.434        | 2.120     | 0.370 | 0.428 |       |                       | 2.149     | 0.370 | 0.463 |       |        |
| Fe1-S2A               | 2.322        | 2.120     | 0.370 | 0.579 |       |                       | 2.149     | 0.370 | 0.627 |       |        |
| Fe1-S3A               | 2.318        | 2.120     | 0.370 | 0.586 |       |                       | 2.149     | 0.370 | 0.633 |       |        |
| Fe1-SG                | 2.348        | 2.120     | 0.370 | 0.540 | 2.133 | 0.133                 | 2.149     | 0.370 | 0.584 | 2.307 | -0.693 |
| Fe2-S1                | 2.487        | 2.120     | 0.370 | 0.371 |       |                       | 2.149     | 0.370 | 0.401 |       |        |
| Fe2-S2A               | 2.300        | 2.120     | 0.370 | 0.615 |       |                       | 2.149     | 0.370 | 0.665 |       |        |
| Fe2-S4A               | 2.308        | 2.120     | 0.370 | 0.602 |       |                       | 2.149     | 0.370 | 0.651 |       |        |
| Fe2-SG                | 2.386        | 2.120     | 0.370 | 0.487 | 2.075 | 0.075                 | 2.149     | 0.370 | 0.527 | 2.244 | -0.756 |
| Fe3-S2A               | 2.341        | 2.120     | 0.370 | 0.550 |       |                       | 2.149     | 0.370 | 0.595 |       |        |
| Fe3-S3A               | 2.342        | 2.120     | 0.370 | 0.549 |       |                       | 2.149     | 0.370 | 0.594 |       |        |
| Fe3-S4A               | 2.303        | 2.120     | 0.370 | 0.610 |       |                       | 2.149     | 0.370 | 0.660 |       |        |
| Fe3-SG                | 2.303        | 2.120     | 0.370 | 0.610 | 2.319 | 0.319                 | 2.149     | 0.370 | 0.660 | 2.508 | -0.492 |
| Fe4-S1                | 2.427        | 2.120     | 0.370 | 0.436 |       |                       | 2.149     | 0.370 | 0.472 |       |        |
| Fe4-S3A               | 2.293        | 2.120     | 0.370 | 0.627 |       |                       | 2.149     | 0.370 | 0.678 |       |        |
| Fe4-S4A               | 2.284        | 2.120     | 0.370 | 0.642 |       |                       | 2.149     | 0.370 | 0.694 |       |        |

|                          |       |       |       |       |                          |       |       |       |       |                          |        |
|--------------------------|-------|-------|-------|-------|--------------------------|-------|-------|-------|-------|--------------------------|--------|
| Fe4-SG                   | 2.341 | 2.120 | 0.370 | 0.550 | 2.255                    | 0.255 | 2.149 | 0.370 | 0.595 | 2.439                    | -0.561 |
| Fe5-S1                   | 2.463 | 2.120 | 0.370 | 0.396 |                          |       | 2.149 | 0.370 | 0.428 |                          |        |
| Fe5-S2B                  | 2.298 | 2.120 | 0.370 | 0.618 |                          |       | 2.149 | 0.370 | 0.669 |                          |        |
| Fe5-S4B                  | 2.295 | 2.120 | 0.370 | 0.623 |                          |       | 2.149 | 0.370 | 0.674 |                          |        |
| Fe5-SG                   | 2.350 | 2.120 | 0.370 | 0.537 | 2.174                    | 0.174 | 2.149 | 0.370 | 0.581 | 2.351                    | -0.649 |
| Fe6-S1(P <sup>N</sup> )  | 2.422 | 2.120 | 0.370 | 0.442 |                          |       | 2.149 | 0.370 | 0.478 |                          |        |
| Fe6-S2B(P <sup>N</sup> ) | 2.412 | 2.120 | 0.370 | 0.454 |                          |       | 2.149 | 0.370 | 0.491 |                          |        |
| Fe6-S3B(P <sup>N</sup> ) | 2.326 | 2.120 | 0.370 | 0.573 |                          |       | 2.149 | 0.370 | 0.620 |                          |        |
| Fe6-SG(P <sup>N</sup> )  | 2.300 | 2.120 | 0.370 | 0.615 | 2.084                    | 0.084 | 2.149 | 0.370 | 0.665 | 2.254                    | -0.746 |
| Fe7-S2B                  | 2.333 | 2.120 | 0.370 | 0.562 |                          |       | 2.149 | 0.370 | 0.608 |                          |        |
| Fe7-S3B                  | 2.296 | 2.120 | 0.370 | 0.621 |                          |       | 2.149 | 0.370 | 0.672 |                          |        |
| Fe7-S4B                  | 2.299 | 2.120 | 0.370 | 0.616 |                          |       | 2.149 | 0.370 | 0.667 |                          |        |
| Fe7-SG                   | 2.301 | 2.120 | 0.370 | 0.613 | 2.413                    | 0.413 | 2.149 | 0.370 | 0.663 | 2.610                    | -0.390 |
| Fe8-S1                   | 2.435 | 2.120 | 0.370 | 0.427 |                          |       | 2.149 | 0.370 | 0.462 |                          |        |
| Fe8-S3B                  | 2.268 | 2.120 | 0.370 | 0.670 |                          |       | 2.149 | 0.370 | 0.725 |                          |        |
| Fe8-S4B                  | 2.291 | 2.120 | 0.370 | 0.630 |                          |       | 2.149 | 0.370 | 0.681 |                          |        |
| Fe8-SG                   | 2.300 | 2.120 | 0.370 | 0.615 | 2.342                    | 0.342 | 2.149 | 0.370 | 0.665 | 2.533                    | -0.467 |
|                          |       |       |       |       | 17.795 (P <sup>N</sup> ) |       |       |       |       | 19.245 (P <sup>N</sup> ) |        |

---

**Table S100** The adopted bond valence analyses for irons in P<sup>N</sup> [2] from VFe protein 7ADY which was reported as superposition of P<sup>N/1+</sup> at 1.05 Å resolution.

| Bond                  | $r_{ij}$ (Å) | $R_0$ (Å) | B (Å) | Bval  | Sum   | Diff.                 | $R_0$ (Å) | B (Å) | Bval  | Sum   | Diff.  |
|-----------------------|--------------|-----------|-------|-------|-------|-----------------------|-----------|-------|-------|-------|--------|
| expected valence = +2 |              |           |       |       |       | expected valence = +3 |           |       |       |       |        |
| Fe1-S1                | 2.421        | 2.120     | 0.370 | 0.443 |       |                       | 2.149     | 0.370 | 0.479 |       |        |
| Fe1-S2A               | 2.331        | 2.120     | 0.370 | 0.565 |       |                       | 2.149     | 0.370 | 0.611 |       |        |
| Fe1-S3A               | 2.314        | 2.120     | 0.370 | 0.592 |       |                       | 2.149     | 0.370 | 0.640 |       |        |
| Fe1-SG                | 2.337        | 2.120     | 0.370 | 0.556 | 2.157 | 0.157                 | 2.149     | 0.370 | 0.602 | 2.333 | -0.667 |
| Fe2-S1                | 2.479        | 2.120     | 0.370 | 0.379 |       |                       | 2.149     | 0.370 | 0.410 |       |        |
| Fe2-S2A               | 2.302        | 2.120     | 0.370 | 0.611 |       |                       | 2.149     | 0.370 | 0.661 |       |        |
| Fe2-S4A               | 2.309        | 2.120     | 0.370 | 0.600 |       |                       | 2.149     | 0.370 | 0.649 |       |        |
| Fe2-SG                | 2.387        | 2.120     | 0.370 | 0.486 | 2.076 | 0.076                 | 2.149     | 0.370 | 0.526 | 2.246 | -0.754 |
| Fe3-S2A               | 2.343        | 2.120     | 0.370 | 0.547 |       |                       | 2.149     | 0.370 | 0.592 |       |        |
| Fe3-S3A               | 2.342        | 2.120     | 0.370 | 0.549 |       |                       | 2.149     | 0.370 | 0.594 |       |        |
| Fe3-S4A               | 2.299        | 2.120     | 0.370 | 0.616 |       |                       | 2.149     | 0.370 | 0.667 |       |        |
| Fe3-SG                | 2.300        | 2.120     | 0.370 | 0.615 | 2.327 | 0.327                 | 2.149     | 0.370 | 0.665 | 2.517 | -0.483 |
| Fe4-S1                | 2.414        | 2.120     | 0.370 | 0.452 |       |                       | 2.149     | 0.370 | 0.489 |       |        |
| Fe4-S3A               | 2.297        | 2.120     | 0.370 | 0.620 |       |                       | 2.149     | 0.370 | 0.670 |       |        |
| Fe4-S4A               | 2.278        | 2.120     | 0.370 | 0.652 |       |                       | 2.149     | 0.370 | 0.706 |       |        |



|                          |       |       |       |       |                          |       |       |       |       |                          |        |
|--------------------------|-------|-------|-------|-------|--------------------------|-------|-------|-------|-------|--------------------------|--------|
| Fe4-SG                   | 2.333 | 2.120 | 0.370 | 0.562 | 2.286                    | 0.286 | 2.149 | 0.370 | 0.608 | 2.473                    | -0.527 |
| Fe5-S1                   | 2.473 | 2.120 | 0.370 | 0.385 |                          |       | 2.149 | 0.370 | 0.417 |                          |        |
| Fe5-S2B                  | 2.288 | 2.120 | 0.370 | 0.635 |                          |       | 2.149 | 0.370 | 0.687 |                          |        |
| Fe5-S4B                  | 2.291 | 2.120 | 0.370 | 0.630 |                          |       | 2.149 | 0.370 | 0.681 |                          |        |
| Fe5-SG                   | 2.361 | 2.120 | 0.370 | 0.521 | 2.171                    | 0.171 | 2.149 | 0.370 | 0.564 | 2.349                    | -0.651 |
| Fe6-S1(P <sup>N</sup> )  | 2.430 | 2.120 | 0.370 | 0.433 |                          |       | 2.149 | 0.370 | 0.468 |                          |        |
| Fe6-S2B(P <sup>N</sup> ) | 2.413 | 2.120 | 0.370 | 0.453 |                          |       | 2.149 | 0.370 | 0.490 |                          |        |
| Fe6-S3B(P <sup>N</sup> ) | 2.379 | 2.120 | 0.370 | 0.497 |                          |       | 2.149 | 0.370 | 0.537 |                          |        |
| Fe6-SG(P <sup>N</sup> )  | 2.285 | 2.120 | 0.370 | 0.640 | 2.022                    | 0.022 | 2.149 | 0.370 | 0.692 | 2.187                    | -0.813 |
| Fe7-S2B                  | 2.339 | 2.120 | 0.370 | 0.553 |                          |       | 2.149 | 0.370 | 0.598 |                          |        |
| Fe7-S3B                  | 2.306 | 2.120 | 0.370 | 0.605 |                          |       | 2.149 | 0.370 | 0.654 |                          |        |
| Fe7-S4B                  | 2.298 | 2.120 | 0.370 | 0.618 |                          |       | 2.149 | 0.370 | 0.669 |                          |        |
| Fe7-SG                   | 2.303 | 2.120 | 0.370 | 0.610 | 2.386                    | 0.386 | 2.149 | 0.370 | 0.660 | 2.581                    | -0.419 |
| Fe8-S1                   | 2.442 | 2.120 | 0.370 | 0.419 |                          |       | 2.149 | 0.370 | 0.453 |                          |        |
| Fe8-S3B                  | 2.264 | 2.120 | 0.370 | 0.678 |                          |       | 2.149 | 0.370 | 0.733 |                          |        |
| Fe8-S4B                  | 2.288 | 2.120 | 0.370 | 0.635 |                          |       | 2.149 | 0.370 | 0.687 |                          |        |
| Fe8-SG                   | 2.294 | 2.120 | 0.370 | 0.625 | 2.356                    | 0.356 | 2.149 | 0.370 | 0.676 | 2.548                    | -0.452 |
|                          |       |       |       |       | 17.783 (P <sup>N</sup> ) |       |       |       |       | 19.233 (P <sup>N</sup> ) |        |

---

**Table S101** The adopted bond valence analyses for irons in P<sup>N</sup> [1] from VFe protein 7AIZ which was reported as superposition of P<sup>N/l+</sup> at 1.05 Å resolution.

| Bond                  | $r_{ij}$ (Å) | $R_0$ (Å) | B (Å) | Bval  | Sum   | Diff.                 | $R_0$ (Å) | B (Å) | Bval  | Sum   | Diff.  |
|-----------------------|--------------|-----------|-------|-------|-------|-----------------------|-----------|-------|-------|-------|--------|
| expected valence = +2 |              |           |       |       |       | expected valence = +3 |           |       |       |       |        |
| Fe1-S1                | 2.431        | 2.120     | 0.370 | 0.431 |       |                       | 2.149     | 0.370 | 0.467 |       |        |
| Fe1-S2A               | 2.334        | 2.120     | 0.370 | 0.561 |       |                       | 2.149     | 0.370 | 0.607 |       |        |
| Fe1-S3A               | 2.318        | 2.120     | 0.370 | 0.586 |       |                       | 2.149     | 0.370 | 0.633 |       |        |
| Fe1-SG                | 2.330        | 2.120     | 0.370 | 0.567 | 2.145 | 0.145                 | 2.149     | 0.370 | 0.613 | 2.320 | -0.680 |
| Fe2-S1                | 2.471        | 2.120     | 0.370 | 0.387 |       |                       | 2.149     | 0.370 | 0.419 |       |        |
| Fe2-S2A               | 2.298        | 2.120     | 0.370 | 0.618 |       |                       | 2.149     | 0.370 | 0.669 |       |        |
| Fe2-S4A               | 2.304        | 2.120     | 0.370 | 0.608 |       |                       | 2.149     | 0.370 | 0.658 |       |        |
| Fe2-SG                | 2.401        | 2.120     | 0.370 | 0.468 | 2.081 | 0.081                 | 2.149     | 0.370 | 0.506 | 2.251 | -0.749 |
| Fe3-S2A               | 2.331        | 2.120     | 0.370 | 0.565 |       |                       | 2.149     | 0.370 | 0.611 |       |        |
| Fe3-S3A               | 2.341        | 2.120     | 0.370 | 0.550 |       |                       | 2.149     | 0.370 | 0.595 |       |        |
| Fe3-S4A               | 2.308        | 2.120     | 0.370 | 0.602 |       |                       | 2.149     | 0.370 | 0.651 |       |        |
| Fe3-SG                | 2.313        | 2.120     | 0.370 | 0.594 | 2.311 | 0.311                 | 2.149     | 0.370 | 0.642 | 2.499 | -0.501 |
| Fe4-S1                | 2.418        | 2.120     | 0.370 | 0.447 |       |                       | 2.149     | 0.370 | 0.483 |       |        |
| Fe4-S3A               | 2.301        | 2.120     | 0.370 | 0.613 |       |                       | 2.149     | 0.370 | 0.663 |       |        |
| Fe4-S4A               | 2.284        | 2.120     | 0.370 | 0.642 |       |                       | 2.149     | 0.370 | 0.694 |       |        |

|                          |       |       |       |       |                          |       |       |       |       |                          |        |
|--------------------------|-------|-------|-------|-------|--------------------------|-------|-------|-------|-------|--------------------------|--------|
| Fe4-SG                   | 2.330 | 2.120 | 0.370 | 0.567 | 2.269                    | 0.269 | 2.149 | 0.370 | 0.613 | 2.454                    | -0.546 |
| Fe5-S1                   | 2.467 | 2.120 | 0.370 | 0.391 |                          |       | 2.149 | 0.370 | 0.423 |                          |        |
| Fe5-S2B                  | 2.284 | 2.120 | 0.370 | 0.642 |                          |       | 2.149 | 0.370 | 0.694 |                          |        |
| Fe5-S4B                  | 2.285 | 2.120 | 0.370 | 0.640 |                          |       | 2.149 | 0.370 | 0.692 |                          |        |
| Fe5-SG                   | 2.356 | 2.120 | 0.370 | 0.528 | 2.202                    | 0.202 | 2.149 | 0.370 | 0.572 | 2.382                    | -0.618 |
| Fe6-S1(P <sup>N</sup> )  | 2.464 | 2.120 | 0.370 | 0.395 |                          |       | 2.149 | 0.370 | 0.427 |                          |        |
| Fe6-S2B(P <sup>N</sup> ) | 2.396 | 2.120 | 0.370 | 0.474 |                          |       | 2.149 | 0.370 | 0.513 |                          |        |
| Fe6-S3B(P <sup>N</sup> ) | 2.308 | 2.120 | 0.370 | 0.602 |                          |       | 2.149 | 0.370 | 0.651 |                          |        |
| Fe6-SG(P <sup>N</sup> )  | 2.303 | 2.120 | 0.370 | 0.610 | 2.080                    | 0.080 | 2.149 | 0.370 | 0.660 | 2.250                    | -0.750 |
| Fe7-S2B                  | 2.326 | 2.120 | 0.370 | 0.573 |                          |       | 2.149 | 0.370 | 0.620 |                          |        |
| Fe7-S3B                  | 2.295 | 2.120 | 0.370 | 0.623 |                          |       | 2.149 | 0.370 | 0.674 |                          |        |
| Fe7-S4B                  | 2.299 | 2.120 | 0.370 | 0.616 |                          |       | 2.149 | 0.370 | 0.667 |                          |        |
| Fe7-SG                   | 2.303 | 2.120 | 0.370 | 0.610 | 2.422                    | 0.422 | 2.149 | 0.370 | 0.660 | 2.620                    | -0.380 |
| Fe8-S1                   | 2.431 | 2.120 | 0.370 | 0.431 |                          |       | 2.149 | 0.370 | 0.467 |                          |        |
| Fe8-S3B                  | 2.262 | 2.120 | 0.370 | 0.681 |                          |       | 2.149 | 0.370 | 0.737 |                          |        |
| Fe8-S4B                  | 2.284 | 2.120 | 0.370 | 0.642 |                          |       | 2.149 | 0.370 | 0.694 |                          |        |
| Fe8-SG                   | 2.311 | 2.120 | 0.370 | 0.597 | 2.351                    | 0.351 | 2.149 | 0.370 | 0.645 | 2.543                    | -0.457 |
|                          |       |       |       |       | 17.862 (P <sup>N</sup> ) |       |       |       |       | 19.319 (P <sup>N</sup> ) |        |

---

**Table S102** The adopted bond valence analyses for irons in P<sup>N</sup> [2] from VFe protein 7AIZ which was reported as superposition of P<sup>N/l+</sup> at 1.05 Å resolution.

| Bond                  | $r_{ij}$ (Å) | $R_0$ (Å) | B (Å) | Bval  | Sum   | Diff.                 | $R_0$ (Å) | B (Å) | Bval  | Sum   | Diff.  |
|-----------------------|--------------|-----------|-------|-------|-------|-----------------------|-----------|-------|-------|-------|--------|
| expected valence = +2 |              |           |       |       |       | expected valence = +3 |           |       |       |       |        |
| Fe1-S1                | 2.415        | 2.120     | 0.370 | 0.451 |       |                       | 2.149     | 0.370 | 0.487 |       |        |
| Fe1-S2A               | 2.326        | 2.120     | 0.370 | 0.573 |       |                       | 2.149     | 0.370 | 0.620 |       |        |
| Fe1-S3A               | 2.314        | 2.120     | 0.370 | 0.592 |       |                       | 2.149     | 0.370 | 0.640 |       |        |
| Fe1-SG                | 2.335        | 2.120     | 0.370 | 0.559 | 2.175 | 0.175                 | 2.149     | 0.370 | 0.605 | 2.352 | -0.648 |
| Fe2-S1                | 2.473        | 2.120     | 0.370 | 0.385 |       |                       | 2.149     | 0.370 | 0.417 |       |        |
| Fe2-S2A               | 2.302        | 2.120     | 0.370 | 0.611 |       |                       | 2.149     | 0.370 | 0.661 |       |        |
| Fe2-S4A               | 2.314        | 2.120     | 0.370 | 0.592 |       |                       | 2.149     | 0.370 | 0.640 |       |        |
| Fe2-SG                | 2.391        | 2.120     | 0.370 | 0.481 | 2.069 | 0.069                 | 2.149     | 0.370 | 0.520 | 2.238 | -0.762 |
| Fe3-S2A               | 2.347        | 2.120     | 0.370 | 0.541 |       |                       | 2.149     | 0.370 | 0.586 |       |        |
| Fe3-S3A               | 2.339        | 2.120     | 0.370 | 0.553 |       |                       | 2.149     | 0.370 | 0.598 |       |        |
| Fe3-S4A               | 2.303        | 2.120     | 0.370 | 0.610 |       |                       | 2.149     | 0.370 | 0.660 |       |        |
| Fe3-SG                | 2.311        | 2.120     | 0.370 | 0.597 | 2.301 | 0.301                 | 2.149     | 0.370 | 0.645 | 2.489 | -0.511 |
| Fe4-S1                | 2.418        | 2.120     | 0.370 | 0.447 |       |                       | 2.149     | 0.370 | 0.483 |       |        |
| Fe4-S3A               | 2.290        | 2.120     | 0.370 | 0.632 |       |                       | 2.149     | 0.370 | 0.683 |       |        |
| Fe4-S4A               | 2.276        | 2.120     | 0.370 | 0.656 |       |                       | 2.149     | 0.370 | 0.709 |       |        |

|                          |       |       |       |       |                          |        |       |       |       |                          |        |
|--------------------------|-------|-------|-------|-------|--------------------------|--------|-------|-------|-------|--------------------------|--------|
| Fe4-SG                   | 2.334 | 2.120 | 0.370 | 0.561 | 2.295                    | 0.295  | 2.149 | 0.370 | 0.607 | 2.482                    | -0.518 |
| Fe5-S1                   | 2.484 | 2.120 | 0.370 | 0.374 |                          |        | 2.149 | 0.370 | 0.404 |                          |        |
| Fe5-S2B                  | 2.298 | 2.120 | 0.370 | 0.618 |                          |        | 2.149 | 0.370 | 0.669 |                          |        |
| Fe5-S4B                  | 2.291 | 2.120 | 0.370 | 0.630 |                          |        | 2.149 | 0.370 | 0.681 |                          |        |
| Fe5-SG                   | 2.361 | 2.120 | 0.370 | 0.521 | 2.143                    | 0.143  | 2.149 | 0.370 | 0.564 | 2.318                    | -0.682 |
| Fe6-S1(P <sup>N</sup> )  | 2.463 | 2.120 | 0.370 | 0.396 |                          |        | 2.149 | 0.370 | 0.428 |                          |        |
| Fe6-S2B(P <sup>N</sup> ) | 2.392 | 2.120 | 0.370 | 0.479 |                          |        | 2.149 | 0.370 | 0.519 |                          |        |
| Fe6-S3B(P <sup>N</sup> ) | 2.369 | 2.120 | 0.370 | 0.510 |                          |        | 2.149 | 0.370 | 0.552 |                          |        |
| Fe6-SG(P <sup>N</sup> )  | 2.306 | 2.120 | 0.370 | 0.605 | 1.990                    | -0.010 | 2.149 | 0.370 | 0.654 | 2.153                    | -0.847 |
| Fe7-S2B                  | 2.328 | 2.120 | 0.370 | 0.570 |                          |        | 2.149 | 0.370 | 0.616 |                          |        |
| Fe7-S3B                  | 2.310 | 2.120 | 0.370 | 0.598 |                          |        | 2.149 | 0.370 | 0.647 |                          |        |
| Fe7-S4B                  | 2.298 | 2.120 | 0.370 | 0.618 |                          |        | 2.149 | 0.370 | 0.669 |                          |        |
| Fe7-SG                   | 2.304 | 2.120 | 0.370 | 0.608 | 2.395                    | 0.395  | 2.149 | 0.370 | 0.658 | 2.590                    | -0.410 |
| Fe8-S1                   | 2.449 | 2.120 | 0.370 | 0.411 |                          |        | 2.149 | 0.370 | 0.444 |                          |        |
| Fe8-S3B                  | 2.282 | 2.120 | 0.370 | 0.645 |                          |        | 2.149 | 0.370 | 0.698 |                          |        |
| Fe8-S4B                  | 2.283 | 2.120 | 0.370 | 0.644 |                          |        | 2.149 | 0.370 | 0.696 |                          |        |
| Fe8-SG                   | 2.294 | 2.120 | 0.370 | 0.625 | 2.325                    | 0.325  | 2.149 | 0.370 | 0.676 | 2.514                    | -0.486 |
|                          |       |       |       |       | 17.694 (P <sup>N</sup> ) |        |       |       |       | 19.137 (P <sup>N</sup> ) |        |

---

**Table S103** The bond valence analyses of irons in P<sup>N</sup> model compounds DUGNEZ.

| Bond                  | $r_{ij}$ (Å) | $R_0$ (Å) | B (Å) | Bval  | Sum   | Diff.                 | $R_0$ (Å) | B (Å) | Bval  | Sum   | Diff.  |
|-----------------------|--------------|-----------|-------|-------|-------|-----------------------|-----------|-------|-------|-------|--------|
| expected valence = +2 |              |           |       |       |       | expected valence = +3 |           |       |       |       |        |
| Fe1–N1                | 1.927        | 1.769     | 0.370 | 0.652 |       |                       | 2.149     | 0.370 | 0.498 |       |        |
| Fe1–S2                | 2.269        | 2.120     | 0.370 | 0.669 |       |                       | 2.149     | 0.370 | 0.658 |       |        |
| Fe1–S3                | 2.284        | 2.120     | 0.370 | 0.642 |       |                       | 2.149     | 0.370 | 0.743 |       |        |
| Fe1–S4                | 2.307        | 2.120     | 0.370 | 0.603 | 2.566 | 0.566                 | 2.149     | 0.370 | 0.482 | 2.381 | -0.619 |
| Fe2–N2                | 2.048        | 1.769     | 0.370 | 0.470 |       |                       | 2.149     | 0.370 | 0.408 |       |        |
| Fe2–S1                | 2.415        | 2.120     | 0.370 | 0.451 |       |                       | 2.149     | 0.370 | 0.681 |       |        |
| Fe2–S2                | 2.287        | 2.120     | 0.370 | 0.637 |       |                       | 2.149     | 0.370 | 0.679 |       |        |
| Fe2–S3                | 2.274        | 2.120     | 0.370 | 0.660 | 2.217 | 0.217                 | 2.149     | 0.370 | 0.455 | 2.224 | -0.776 |
| Fe3–N4                | 2.083        | 1.769     | 0.370 | 0.428 |       |                       | 2.149     | 0.370 | 0.610 |       |        |
| Fe3–S1                | 2.390        | 2.120     | 0.370 | 0.482 |       |                       | 2.149     | 0.370 | 0.584 |       |        |
| Fe3–S2                | 2.274        | 2.120     | 0.370 | 0.660 |       |                       | 2.149     | 0.370 | 0.689 |       |        |
| Fe3–S4                | 2.283        | 2.120     | 0.370 | 0.644 | 2.213 | 0.213                 | 2.149     | 0.370 | 0.544 | 2.427 | -0.573 |
| Fe4–C25               | 2.127        | 1.470     | 0.370 | 0.169 |       |                       | 2.149     | 0.370 | 0.547 |       |        |
| Fe4–S1                | 2.381        | 2.120     | 0.370 | 0.494 |       |                       | 2.149     | 0.370 | 0.793 |       |        |
| Fe4–S3                | 2.277        | 2.120     | 0.370 | 0.654 |       |                       | 2.149     | 0.370 | 0.761 |       |        |

|         |       |       |       |       |        |        |       |       |       |        |        |
|---------|-------|-------|-------|-------|--------|--------|-------|-------|-------|--------|--------|
| Fe4-S4  | 2.293 | 2.120 | 0.370 | 0.627 | 1.944  | -0.056 | 2.149 | 0.370 | 0.446 | 2.547  | -0.453 |
| Fe5-N3  | 1.917 | 1.769 | 0.370 | 0.670 |        |        | 2.149 | 0.370 | 0.477 |        |        |
| Fe5-S5  | 2.270 | 2.120 | 0.370 | 0.667 |        |        | 2.149 | 0.370 | 0.649 |        |        |
| Fe5-S6  | 2.292 | 2.120 | 0.370 | 0.628 |        |        | 2.149 | 0.370 | 0.793 |        |        |
| Fe5-S7  | 2.299 | 2.120 | 0.370 | 0.616 | 2.582  | 0.582  | 2.149 | 0.370 | 0.559 | 2.478  | -0.522 |
| Fe6-N4  | 2.055 | 1.769 | 0.370 | 0.462 |        |        | 2.149 | 0.370 | 0.384 |        |        |
| Fe6-S1  | 2.421 | 2.120 | 0.370 | 0.443 |        |        | 2.149 | 0.370 | 0.602 |        |        |
| Fe6-S5  | 2.288 | 2.120 | 0.370 | 0.635 |        |        | 2.149 | 0.370 | 0.652 |        |        |
| Fe6-S6  | 2.276 | 2.120 | 0.370 | 0.656 | 2.196  | 0.196  | 2.149 | 0.370 | 0.490 | 2.128  | -0.872 |
| Fe7-N2  | 2.059 | 1.769 | 0.370 | 0.457 |        |        | 2.149 | 0.370 | 0.590 |        |        |
| Fe7-S1  | 2.388 | 2.120 | 0.370 | 0.485 |        |        | 2.149 | 0.370 | 0.565 |        |        |
| Fe7-S5  | 2.276 | 2.120 | 0.370 | 0.656 |        |        | 2.149 | 0.370 | 0.575 |        |        |
| Fe7-S7  | 2.282 | 2.120 | 0.370 | 0.645 | 2.243  | 0.243  | 2.149 | 0.370 | 0.366 | 2.096  | -0.904 |
| Fe8-C45 | 2.111 | 1.470 | 0.370 | 0.177 |        |        | 2.149 | 0.370 | 0.452 |        |        |
| Fe8-S1  | 2.396 | 2.120 | 0.370 | 0.474 |        |        | 2.149 | 0.370 | 0.564 |        |        |
| Fe8-S6  | 2.283 | 2.120 | 0.370 | 0.644 |        |        | 2.149 | 0.370 | 0.765 |        |        |
| Fe8-S7  | 2.291 | 2.120 | 0.370 | 0.630 | 1.925  | -0.075 | 2.149 | 0.370 | 0.428 | 2.209  | -0.791 |
|         |       |       |       |       | 17.886 |        |       |       |       | 19.755 |        |

**Table S104** The bond valence analyses of irons in P<sup>N</sup> model compounds MUF POT.

| Bond                  | $r_{ij}$ (Å) | $R_0$ (Å) | B (Å) | Bval  | Sum   | Diff.                 | $R_0$ (Å) | B (Å) | Bval  | Sum   | Diff.  |
|-----------------------|--------------|-----------|-------|-------|-------|-----------------------|-----------|-------|-------|-------|--------|
| expected valence = +2 |              |           |       |       |       | expected valence = +3 |           |       |       |       |        |
| Fe1–N1                | 1.934        | 1.769     | 0.370 | 0.640 |       |                       | 1.815     | 0.370 | 0.725 |       |        |
| Fe1–S2                | 2.257        | 2.120     | 0.370 | 0.691 |       |                       | 2.149     | 0.370 | 0.747 |       |        |
| Fe1–S3                | 2.290        | 2.120     | 0.370 | 0.632 |       |                       | 2.149     | 0.370 | 0.683 |       |        |
| Fe1–S4                | 2.303        | 2.120     | 0.370 | 0.610 | 2.572 | 0.572                 | 2.149     | 0.370 | 0.660 | 2.814 | -0.186 |
| Fe2–N2                | 2.080        | 1.769     | 0.370 | 0.431 |       |                       | 1.815     | 0.370 | 0.489 |       |        |
| Fe2–S1                | 2.372        | 2.120     | 0.370 | 0.506 |       |                       | 2.149     | 0.370 | 0.547 |       |        |
| Fe2–S2                | 2.273        | 2.120     | 0.370 | 0.661 |       |                       | 2.149     | 0.370 | 0.715 |       |        |
| Fe2–S4                | 2.288        | 2.120     | 0.370 | 0.635 | 2.234 | 0.234                 | 2.149     | 0.370 | 0.687 | 2.438 | -0.562 |
| Fe3–N4                | 2.050        | 1.769     | 0.370 | 0.468 |       |                       | 1.815     | 0.370 | 0.530 |       |        |
| Fe3–S1                | 2.423        | 2.120     | 0.370 | 0.441 |       |                       | 2.149     | 0.370 | 0.477 |       |        |
| Fe3–S2                | 2.294        | 2.120     | 0.370 | 0.625 |       |                       | 2.149     | 0.370 | 0.676 |       |        |
| Fe3–S3                | 2.302        | 2.120     | 0.370 | 0.611 | 2.145 | 0.145                 | 2.149     | 0.370 | 0.661 | 2.344 | -0.656 |
| Fe4–S1                | 2.404        | 2.120     | 0.370 | 0.464 |       |                       | 2.149     | 0.370 | 0.502 |       |        |
| Fe4–S3                | 2.270        | 2.120     | 0.370 | 0.667 |       |                       | 2.149     | 0.370 | 0.721 |       |        |
| Fe4–S4                | 2.295        | 2.120     | 0.370 | 0.623 |       |                       | 2.149     | 0.370 | 0.674 |       |        |



|        |       |       |       |       |        |       |       |       |       |        |        |
|--------|-------|-------|-------|-------|--------|-------|-------|-------|-------|--------|--------|
| Fe4-S8 | 2.275 | 2.120 | 0.370 | 0.658 | 2.412  | 0.412 | 2.149 | 0.370 | 0.711 | 2.608  | -0.392 |
| Fe5-N3 | 1.905 | 1.769 | 0.370 | 0.692 |        |       | 1.815 | 0.370 | 0.784 |        |        |
| Fe5-S5 | 2.280 | 2.120 | 0.370 | 0.649 |        |       | 2.149 | 0.370 | 0.702 |        |        |
| Fe5-S6 | 2.302 | 2.120 | 0.370 | 0.611 |        |       | 2.149 | 0.370 | 0.661 |        |        |
| Fe5-S7 | 2.284 | 2.120 | 0.370 | 0.642 | 2.595  | 0.595 | 2.149 | 0.370 | 0.694 | 2.842  | -0.158 |
| Fe6-N4 | 2.068 | 1.769 | 0.370 | 0.446 |        |       | 1.815 | 0.370 | 0.505 |        |        |
| Fe6-S1 | 2.394 | 2.120 | 0.370 | 0.477 |        |       | 2.149 | 0.370 | 0.516 |        |        |
| Fe6-S5 | 2.273 | 2.120 | 0.370 | 0.661 |        |       | 2.149 | 0.370 | 0.715 |        |        |
| Fe6-S7 | 2.271 | 2.120 | 0.370 | 0.665 | 2.249  | 0.249 | 2.149 | 0.370 | 0.719 | 2.455  | -0.545 |
| Fe7-N2 | 2.083 | 1.769 | 0.370 | 0.428 |        |       | 1.815 | 0.370 | 0.485 |        |        |
| Fe7-S1 | 2.422 | 2.120 | 0.370 | 0.442 |        |       | 2.149 | 0.370 | 0.478 |        |        |
| Fe7-S5 | 2.282 | 2.120 | 0.370 | 0.645 |        |       | 2.149 | 0.370 | 0.698 |        |        |
| Fe7-S6 | 2.294 | 2.120 | 0.370 | 0.625 | 2.140  | 0.140 | 2.149 | 0.370 | 0.676 | 2.337  | -0.663 |
| Fe8-S1 | 2.405 | 2.120 | 0.370 | 0.463 |        |       | 2.149 | 0.370 | 0.501 |        |        |
| Fe8-S6 | 2.288 | 2.120 | 0.370 | 0.635 |        |       | 2.149 | 0.370 | 0.687 |        |        |
| Fe8-S7 | 2.272 | 2.120 | 0.370 | 0.663 |        |       | 2.149 | 0.370 | 0.717 |        |        |
| Fe8-S9 | 2.280 | 2.120 | 0.370 | 0.649 | 2.410  | 0.410 | 2.149 | 0.370 | 0.702 | 2.606  | -0.394 |
|        |       |       |       |       | 18.757 |       |       |       |       | 20.444 |        |

**Table S105** The bond valence analyses of irons in P<sup>N</sup> model compounds MUFPUZ.

| Bond                  | $r_{ij}$ (Å) | $R_0$ (Å) | B (Å) | Bval  | Sum   | Diff.                 | $R_0$ (Å) | B (Å) | Bval  | Sum   | Diff.  |
|-----------------------|--------------|-----------|-------|-------|-------|-----------------------|-----------|-------|-------|-------|--------|
| expected valence = +2 |              |           |       |       |       | expected valence = +3 |           |       |       |       |        |
| Fe1–N1                | 1.918        | 1.769     | 0.370 | 0.669 |       |                       | 1.815     | 0.370 | 0.757 |       |        |
| Fe1–S2                | 2.276        | 2.120     | 0.370 | 0.656 |       |                       | 2.149     | 0.370 | 0.709 |       |        |
| Fe1–S3                | 2.300        | 2.120     | 0.370 | 0.615 |       |                       | 2.149     | 0.370 | 0.665 |       |        |
| Fe1–S4                | 2.296        | 2.120     | 0.370 | 0.621 | 2.561 | 0.561                 | 2.149     | 0.370 | 0.672 | 2.804 | -0.196 |
| Fe2–N2                | 2.064        | 1.769     | 0.370 | 0.451 |       |                       | 1.815     | 0.370 | 0.510 |       |        |
| Fe2–S1                | 2.396        | 2.120     | 0.370 | 0.474 |       |                       | 2.149     | 0.370 | 0.513 |       |        |
| Fe2–S2                | 2.284        | 2.120     | 0.370 | 0.642 |       |                       | 2.149     | 0.370 | 0.694 |       |        |
| Fe2–S4                | 2.279        | 2.120     | 0.370 | 0.651 | 2.217 | 0.217                 | 2.149     | 0.370 | 0.704 | 2.421 | -0.579 |
| Fe3–N2A               | 2.058        | 1.769     | 0.370 | 0.458 |       |                       | 1.815     | 0.370 | 0.519 |       |        |
| Fe3–S1                | 2.424        | 2.120     | 0.370 | 0.440 |       |                       | 2.149     | 0.370 | 0.476 |       |        |
| Fe3–S2                | 2.295        | 2.120     | 0.370 | 0.623 |       |                       | 2.149     | 0.370 | 0.674 |       |        |
| Fe3–S4                | 2.294        | 2.120     | 0.370 | 0.625 | 2.146 | 0.146                 | 2.149     | 0.370 | 0.676 | 2.344 | -0.656 |
| Fe4–S1                | 2.395        | 2.120     | 0.370 | 0.476 |       |                       | 2.149     | 0.370 | 0.514 |       |        |
| Fe4–S3                | 2.304        | 2.120     | 0.370 | 0.608 |       |                       | 2.149     | 0.370 | 0.658 |       |        |
| Fe4–S4                | 2.284        | 2.120     | 0.370 | 0.642 |       |                       | 2.149     | 0.370 | 0.694 |       |        |

|          |       |       |       |       |        |       |       |       |       |        |        |
|----------|-------|-------|-------|-------|--------|-------|-------|-------|-------|--------|--------|
| Fe4-S8   | 2.311 | 2.120 | 0.370 | 0.597 | 2.322  | 0.322 | 2.149 | 0.370 | 0.645 | 2.512  | -0.488 |
| Fe1A-N1A | 1.918 | 1.769 | 0.370 | 0.669 |        |       | 1.815 | 0.370 | 0.757 |        |        |
| Fe1A-S2A | 2.276 | 2.120 | 0.370 | 0.656 |        |       | 2.149 | 0.370 | 0.709 |        |        |
| Fe1A-S3A | 2.300 | 2.120 | 0.370 | 0.615 |        |       | 2.149 | 0.370 | 0.665 |        |        |
| Fe1A-S4A | 2.296 | 2.120 | 0.370 | 0.621 | 2.561  | 0.561 | 2.149 | 0.370 | 0.672 | 2.804  | -0.196 |
| Fe2A-N2A | 2.064 | 1.769 | 0.370 | 0.451 |        |       | 1.815 | 0.370 | 0.510 |        |        |
| Fe2A-S1  | 2.396 | 2.120 | 0.370 | 0.474 |        |       | 2.149 | 0.370 | 0.513 |        |        |
| Fe2A-S2A | 2.284 | 2.120 | 0.370 | 0.642 |        |       | 2.149 | 0.370 | 0.694 |        |        |
| Fe2A-S3A | 2.279 | 2.120 | 0.370 | 0.651 | 2.217  | 0.217 | 2.149 | 0.370 | 0.704 | 2.421  | -0.579 |
| Fe3A-N2  | 2.058 | 1.769 | 0.370 | 0.458 |        |       | 1.815 | 0.370 | 0.519 |        |        |
| Fe3A-S1  | 2.424 | 2.120 | 0.370 | 0.440 |        |       | 2.149 | 0.370 | 0.476 |        |        |
| Fe3A-S2A | 2.295 | 2.120 | 0.370 | 0.623 |        |       | 2.149 | 0.370 | 0.674 |        |        |
| Fe3A-S4A | 2.294 | 2.120 | 0.370 | 0.625 | 2.146  | 0.146 | 2.149 | 0.370 | 0.676 | 2.344  | -0.656 |
| Fe4A-S1  | 2.395 | 2.120 | 0.370 | 0.476 |        |       | 2.149 | 0.370 | 0.514 |        |        |
| Fe4A-S3A | 2.304 | 2.120 | 0.370 | 0.608 |        |       | 2.149 | 0.370 | 0.658 |        |        |
| Fe4A-S4A | 2.284 | 2.120 | 0.370 | 0.642 |        |       | 2.149 | 0.370 | 0.694 |        |        |
| Fe4A-S5A | 2.311 | 2.120 | 0.370 | 0.597 | 2.322  | 0.322 | 2.149 | 0.370 | 0.645 | 2.512  | -0.488 |
|          |       |       |       |       | 18.493 |       |       |       |       | 20.161 |        |

**Table S106** The bond valence analyses of irons in P<sup>N</sup> model compounds MUFQAG.

| Bond                  | $r_{ij}$ (Å) | $R_0$ (Å) | B (Å) | Bval  | Sum   | Diff.                 | $R_0$ (Å) | B (Å) | Bval  | Sum   | Diff.  |
|-----------------------|--------------|-----------|-------|-------|-------|-----------------------|-----------|-------|-------|-------|--------|
| expected valence = +2 |              |           |       |       |       | expected valence = +3 |           |       |       |       |        |
| Fe1–N1                | 1.923        | 1.769     | 0.370 | 0.660 |       |                       | 1.815     | 0.370 | 0.747 |       |        |
| Fe1–S2                | 2.277        | 2.120     | 0.370 | 0.654 |       |                       | 2.149     | 0.370 | 0.708 |       |        |
| Fe1–S3                | 2.289        | 2.120     | 0.370 | 0.633 |       |                       | 2.149     | 0.370 | 0.685 |       |        |
| Fe1–S4                | 2.295        | 2.120     | 0.370 | 0.623 | 2.570 | 0.570                 | 2.149     | 0.370 | 0.674 | 2.813 | -0.187 |
| Fe2–N2                | 2.055        | 1.769     | 0.370 | 0.462 |       |                       | 1.815     | 0.370 | 0.523 |       |        |
| Fe2–S1                | 2.426        | 2.120     | 0.370 | 0.437 |       |                       | 2.149     | 0.370 | 0.473 |       |        |
| Fe2–S2                | 2.291        | 2.120     | 0.370 | 0.630 |       |                       | 2.149     | 0.370 | 0.681 |       |        |
| Fe2–S3                | 2.300        | 2.120     | 0.370 | 0.615 | 2.144 | 0.144                 | 2.149     | 0.370 | 0.665 | 2.342 | -0.658 |
| Fe3–N4                | 2.063        | 1.769     | 0.370 | 0.452 |       |                       | 1.815     | 0.370 | 0.512 |       |        |
| Fe3–S1                | 2.387        | 2.120     | 0.370 | 0.486 |       |                       | 2.149     | 0.370 | 0.526 |       |        |
| Fe3–S2                | 2.276        | 2.120     | 0.370 | 0.656 |       |                       | 2.149     | 0.370 | 0.709 |       |        |
| Fe3–S4                | 2.282        | 2.120     | 0.370 | 0.645 | 2.239 | 0.239                 | 2.149     | 0.370 | 0.698 | 2.445 | -0.555 |
| Fe4–S1                | 2.397        | 2.120     | 0.370 | 0.473 |       |                       | 2.149     | 0.370 | 0.512 |       |        |
| Fe4–S3                | 2.281        | 2.120     | 0.370 | 0.647 |       |                       | 2.149     | 0.370 | 0.700 |       |        |
| Fe4–S4                | 2.289        | 2.120     | 0.370 | 0.633 |       |                       | 2.149     | 0.370 | 0.685 |       |        |

|        |       |       |       |       |        |       |       |       |       |        |        |
|--------|-------|-------|-------|-------|--------|-------|-------|-------|-------|--------|--------|
| Fe4-S8 | 2.286 | 2.120 | 0.370 | 0.638 | 2.392  | 0.392 | 2.149 | 0.370 | 0.691 | 2.587  | -0.413 |
| Fe5-N3 | 1.923 | 1.769 | 0.370 | 0.660 |        |       | 1.815 | 0.370 | 0.747 |        |        |
| Fe5-S5 | 2.270 | 2.120 | 0.370 | 0.667 |        |       | 2.149 | 0.370 | 0.721 |        |        |
| Fe5-S6 | 2.305 | 2.120 | 0.370 | 0.607 |        |       | 2.149 | 0.370 | 0.656 |        |        |
| Fe5-S7 | 2.297 | 2.120 | 0.370 | 0.620 | 2.553  | 0.553 | 2.149 | 0.370 | 0.670 | 2.794  | -0.206 |
| Fe6-N4 | 2.055 | 1.769 | 0.370 | 0.462 |        |       | 1.815 | 0.370 | 0.523 |        |        |
| Fe6-S1 | 2.425 | 2.120 | 0.370 | 0.439 |        |       | 2.149 | 0.370 | 0.474 |        |        |
| Fe6-S5 | 2.287 | 2.120 | 0.370 | 0.637 |        |       | 2.149 | 0.370 | 0.689 |        |        |
| Fe6-S6 | 2.295 | 2.120 | 0.370 | 0.623 | 2.160  | 0.160 | 2.149 | 0.370 | 0.674 | 2.360  | -0.640 |
| Fe7-N2 | 2.075 | 1.769 | 0.370 | 0.437 |        |       | 1.815 | 0.370 | 0.495 |        |        |
| Fe7-S1 | 2.391 | 2.120 | 0.370 | 0.481 |        |       | 2.149 | 0.370 | 0.520 |        |        |
| Fe7-S5 | 2.282 | 2.120 | 0.370 | 0.645 |        |       | 2.149 | 0.370 | 0.698 |        |        |
| Fe7-S7 | 2.278 | 2.120 | 0.370 | 0.652 | 2.216  | 0.216 | 2.149 | 0.370 | 0.706 | 2.419  | -0.581 |
| Fe8-S1 | 2.405 | 2.120 | 0.370 | 0.463 |        |       | 2.149 | 0.370 | 0.501 |        |        |
| Fe8-S6 | 2.285 | 2.120 | 0.370 | 0.640 |        |       | 2.149 | 0.370 | 0.692 |        |        |
| Fe8-S7 | 2.283 | 2.120 | 0.370 | 0.644 |        |       | 2.149 | 0.370 | 0.696 |        |        |
| Fe8-S9 | 2.276 | 2.120 | 0.370 | 0.656 | 2.403  | 0.403 | 2.149 | 0.370 | 0.709 | 2.599  | -0.401 |
|        |       |       |       |       | 18.676 |       |       |       |       | 20.358 |        |

**Table S107** The bond valence analyses of irons in P<sup>N</sup> model compounds MUFQEK.

| Bond                  | $r_{ij}$ (Å) | $R_0$ (Å) | B (Å) | Bval  | Sum   | Diff.                 | $R_0$ (Å) | B (Å) | Bval  | Sum   | Diff.  |
|-----------------------|--------------|-----------|-------|-------|-------|-----------------------|-----------|-------|-------|-------|--------|
| expected valence = +2 |              |           |       |       |       | expected valence = +3 |           |       |       |       |        |
| Fe1–N1                | 1.922        | 1.769     | 0.370 | 0.661 |       |                       | 1.815     | 0.370 | 0.749 |       |        |
| Fe1–S2                | 2.262        | 2.120     | 0.370 | 0.681 |       |                       | 2.149     | 0.370 | 0.737 |       |        |
| Fe1–S3                | 2.296        | 2.120     | 0.370 | 0.621 |       |                       | 2.149     | 0.370 | 0.672 |       |        |
| Fe1–S4                | 2.308        | 2.120     | 0.370 | 0.602 | 2.566 | 0.566                 | 2.149     | 0.370 | 0.651 | 2.809 | -0.191 |
| Fe2–N2                | 2.072        | 1.769     | 0.370 | 0.441 |       |                       | 1.815     | 0.370 | 0.499 |       |        |
| Fe2–S1                | 2.392        | 2.120     | 0.370 | 0.479 |       |                       | 2.149     | 0.370 | 0.519 |       |        |
| Fe2–S2                | 2.270        | 2.120     | 0.370 | 0.667 |       |                       | 2.149     | 0.370 | 0.721 |       |        |
| Fe2–S3                | 2.282        | 2.120     | 0.370 | 0.645 | 2.232 | 0.232                 | 2.149     | 0.370 | 0.698 | 2.437 | -0.563 |
| Fe3–N4                | 2.088        | 1.769     | 0.370 | 0.422 |       |                       | 1.815     | 0.370 | 0.478 |       |        |
| Fe3–S1                | 2.404        | 2.120     | 0.370 | 0.464 |       |                       | 2.149     | 0.370 | 0.502 |       |        |
| Fe3–S2                | 2.282        | 2.120     | 0.370 | 0.645 |       |                       | 2.149     | 0.370 | 0.698 |       |        |
| Fe3–S4                | 2.287        | 2.120     | 0.370 | 0.637 | 2.169 | 0.169                 | 2.149     | 0.370 | 0.689 | 2.367 | -0.633 |
| Fe4–S1                | 2.411        | 2.120     | 0.370 | 0.455 |       |                       | 2.149     | 0.370 | 0.493 |       |        |
| Fe4–S3                | 2.290        | 2.120     | 0.370 | 0.632 |       |                       | 2.149     | 0.370 | 0.683 |       |        |
| Fe4–S4                | 2.278        | 2.120     | 0.370 | 0.652 |       |                       | 2.149     | 0.370 | 0.706 |       |        |

|        |       |       |       |       |        |       |       |       |       |        |        |
|--------|-------|-------|-------|-------|--------|-------|-------|-------|-------|--------|--------|
| Fe4-S8 | 2.257 | 2.120 | 0.370 | 0.691 | 2.430  | 0.430 | 2.149 | 0.370 | 0.747 | 2.628  | -0.372 |
| Fe5-N3 | 1.895 | 1.769 | 0.370 | 0.711 |        |       | 1.815 | 0.370 | 0.806 |        |        |
| Fe5-S5 | 2.265 | 2.120 | 0.370 | 0.676 |        |       | 2.149 | 0.370 | 0.731 |        |        |
| Fe5-S6 | 2.293 | 2.120 | 0.370 | 0.627 |        |       | 2.149 | 0.370 | 0.678 |        |        |
| Fe5-S7 | 2.296 | 2.120 | 0.370 | 0.621 | 2.635  | 0.635 | 2.149 | 0.370 | 0.672 | 2.886  | -0.114 |
| Fe6-N4 | 2.057 | 1.769 | 0.370 | 0.459 |        |       | 1.815 | 0.370 | 0.520 |        |        |
| Fe6-S1 | 2.388 | 2.120 | 0.370 | 0.485 |        |       | 2.149 | 0.370 | 0.524 |        |        |
| Fe6-S5 | 2.255 | 2.120 | 0.370 | 0.694 |        |       | 2.149 | 0.370 | 0.751 |        |        |
| Fe6-S6 | 2.286 | 2.120 | 0.370 | 0.638 | 2.277  | 0.277 | 2.149 | 0.370 | 0.691 | 2.486  | -0.514 |
| Fe7-N2 | 2.072 | 1.769 | 0.370 | 0.441 |        |       | 1.815 | 0.370 | 0.499 |        |        |
| Fe7-S1 | 2.411 | 2.120 | 0.370 | 0.455 |        |       | 2.149 | 0.370 | 0.493 |        |        |
| Fe7-S5 | 2.291 | 2.120 | 0.370 | 0.630 |        |       | 2.149 | 0.370 | 0.681 |        |        |
| Fe7-S7 | 2.293 | 2.120 | 0.370 | 0.627 | 2.153  | 0.153 | 2.149 | 0.370 | 0.678 | 2.351  | -0.649 |
| Fe8-S1 | 2.398 | 2.120 | 0.370 | 0.472 |        |       | 2.149 | 0.370 | 0.510 |        |        |
| Fe8-S6 | 2.308 | 2.120 | 0.370 | 0.602 |        |       | 2.149 | 0.370 | 0.651 |        |        |
| Fe8-S7 | 2.274 | 2.120 | 0.370 | 0.660 |        |       | 2.149 | 0.370 | 0.713 |        |        |
| Fe8-S9 | 2.264 | 2.120 | 0.370 | 0.678 | 2.411  | 0.411 | 2.149 | 0.370 | 0.733 | 2.607  | -0.393 |
|        |       |       |       |       | 18.872 |       |       |       |       | 20.570 |        |

**Table S108** The bond valence analyses of irons in P<sup>N</sup> model compounds MUFQIO.

| Bond                  | $r_{ij}$ (Å) | $R_0$ (Å) | B (Å) | Bval  | Sum   | Diff.                 | $R_0$ (Å) | B (Å) | Bval  | Sum   | Diff.  |
|-----------------------|--------------|-----------|-------|-------|-------|-----------------------|-----------|-------|-------|-------|--------|
| expected valence = +2 |              |           |       |       |       | expected valence = +3 |           |       |       |       |        |
| Fe1–N1                | 1.909        | 1.769     | 0.370 | 0.685 |       |                       | 1.815     | 0.370 | 0.776 |       |        |
| Fe1–S2                | 2.271        | 2.120     | 0.370 | 0.665 |       |                       | 2.149     | 0.370 | 0.719 |       |        |
| Fe1–S3                | 2.295        | 2.120     | 0.370 | 0.623 |       |                       | 2.149     | 0.370 | 0.674 |       |        |
| Fe1–S4                | 2.296        | 2.120     | 0.370 | 0.621 | 2.594 | 0.594                 | 2.149     | 0.370 | 0.672 | 2.841 | -0.159 |
| Fe2–N2                | 2.072        | 1.769     | 0.370 | 0.441 |       |                       | 1.815     | 0.370 | 0.499 |       |        |
| Fe2–S1                | 2.395        | 2.120     | 0.370 | 0.476 |       |                       | 2.149     | 0.370 | 0.514 |       |        |
| Fe2–S2                | 2.273        | 2.120     | 0.370 | 0.661 |       |                       | 2.149     | 0.370 | 0.715 |       |        |
| Fe2–S3                | 2.272        | 2.120     | 0.370 | 0.663 | 2.241 | 0.241                 | 2.149     | 0.370 | 0.717 | 2.446 | -0.554 |
| Fe3–N4                | 2.048        | 1.769     | 0.370 | 0.470 |       |                       | 1.815     | 0.370 | 0.533 |       |        |
| Fe3–S1                | 2.437        | 2.120     | 0.370 | 0.425 |       |                       | 2.149     | 0.370 | 0.459 |       |        |
| Fe3–S2                | 2.287        | 2.120     | 0.370 | 0.637 |       |                       | 2.149     | 0.370 | 0.689 |       |        |
| Fe3–S4                | 2.291        | 2.120     | 0.370 | 0.630 | 2.162 | 0.162                 | 2.149     | 0.370 | 0.681 | 2.362 | -0.638 |
| Fe4–S1                | 2.417        | 2.120     | 0.370 | 0.448 |       |                       | 2.149     | 0.370 | 0.485 |       |        |
| Fe4–S3                | 2.290        | 2.120     | 0.370 | 0.632 |       |                       | 2.149     | 0.370 | 0.683 |       |        |
| Fe4–S4                | 2.277        | 2.120     | 0.370 | 0.654 |       |                       | 2.149     | 0.370 | 0.708 |       |        |



|          |       |       |       |       |        |       |       |       |       |        |        |
|----------|-------|-------|-------|-------|--------|-------|-------|-------|-------|--------|--------|
| Fe4-S5   | 2.292 | 2.120 | 0.370 | 0.628 | 2.362  | 0.362 | 2.149 | 0.370 | 0.679 | 2.555  | -0.445 |
| Fe1A-N1A | 1.909 | 1.769 | 0.370 | 0.685 |        |       | 1.815 | 0.370 | 0.776 |        |        |
| Fe1A-S2A | 2.271 | 2.120 | 0.370 | 0.665 |        |       | 2.149 | 0.370 | 0.719 |        |        |
| Fe1A-S3A | 2.295 | 2.120 | 0.370 | 0.623 |        |       | 2.149 | 0.370 | 0.674 |        |        |
| Fe1A-S4A | 2.296 | 2.120 | 0.370 | 0.621 | 2.594  | 0.594 | 2.149 | 0.370 | 0.672 | 2.841  | -0.159 |
| Fe2A-N2A | 2.072 | 1.769 | 0.370 | 0.441 |        |       | 1.815 | 0.370 | 0.499 |        |        |
| Fe2A-S1  | 2.395 | 2.120 | 0.370 | 0.476 |        |       | 2.149 | 0.370 | 0.514 |        |        |
| Fe2A-S2A | 2.273 | 2.120 | 0.370 | 0.661 |        |       | 2.149 | 0.370 | 0.715 |        |        |
| Fe2A-S3A | 2.272 | 2.120 | 0.370 | 0.663 | 2.241  | 0.241 | 2.149 | 0.370 | 0.717 | 2.446  | -0.554 |
| Fe3A-N2  | 2.048 | 1.769 | 0.370 | 0.470 |        |       | 1.815 | 0.370 | 0.533 |        |        |
| Fe3-S1   | 2.437 | 2.120 | 0.370 | 0.425 |        |       | 2.149 | 0.370 | 0.459 |        |        |
| Fe3-S2A  | 2.287 | 2.120 | 0.370 | 0.637 |        |       | 2.149 | 0.370 | 0.689 |        |        |
| Fe3-S4A  | 2.291 | 2.120 | 0.370 | 0.630 | 2.162  | 0.162 | 2.149 | 0.370 | 0.681 | 2.362  | -0.638 |
| Fe4A-S1  | 2.417 | 2.120 | 0.370 | 0.448 |        |       | 2.149 | 0.370 | 0.485 |        |        |
| Fe4-S3A  | 2.290 | 2.120 | 0.370 | 0.632 |        |       | 2.149 | 0.370 | 0.683 |        |        |
| Fe4-S4A  | 2.277 | 2.120 | 0.370 | 0.654 |        |       | 2.149 | 0.370 | 0.708 |        |        |
| Fe4-S5A  | 2.292 | 2.120 | 0.370 | 0.628 | 2.362  | 0.362 | 2.149 | 0.370 | 0.679 | 2.555  | -0.445 |
|          |       |       |       |       | 18.719 |       |       |       |       | 20.407 |        |

**Table S109** The bond valence analyses of irons in P<sup>N</sup> model compounds MUFQOU.

| Bond                  | $r_{ij}$ (Å) | $R_0$ (Å) | B (Å) | Bval  | Sum   | Diff.                 | $R_0$ (Å) | B (Å) | Bval  | Sum   | Diff.  |
|-----------------------|--------------|-----------|-------|-------|-------|-----------------------|-----------|-------|-------|-------|--------|
| expected valence = +2 |              |           |       |       |       | expected valence = +3 |           |       |       |       |        |
| Fe1–N1                | 1.901        | 1.769     | 0.370 | 0.700 |       |                       | 1.815     | 0.370 | 0.793 |       |        |
| Fe1–S2                | 2.273        | 2.120     | 0.370 | 0.661 |       |                       | 2.149     | 0.370 | 0.715 |       |        |
| Fe1–S3                | 2.280        | 2.120     | 0.370 | 0.649 |       |                       | 2.149     | 0.370 | 0.702 |       |        |
| Fe1–S4                | 2.287        | 2.120     | 0.370 | 0.637 | 2.647 | 0.647                 | 2.149     | 0.370 | 0.689 | 2.898 | -0.102 |
| Fe2–N2                | 2.044        | 1.769     | 0.370 | 0.476 |       |                       | 1.815     | 0.370 | 0.539 |       |        |
| Fe2–S1                | 2.405        | 2.120     | 0.370 | 0.463 |       |                       | 2.149     | 0.370 | 0.501 |       |        |
| Fe2–S2                | 2.279        | 2.120     | 0.370 | 0.651 |       |                       | 2.149     | 0.370 | 0.704 |       |        |
| Fe2–S3                | 2.295        | 2.120     | 0.370 | 0.623 | 2.212 | 0.212                 | 2.149     | 0.370 | 0.674 | 2.417 | -0.583 |
| Fe3–N3                | 2.050        | 1.769     | 0.370 | 0.468 |       |                       | 1.815     | 0.370 | 0.530 |       |        |
| Fe3–S1                | 2.407        | 2.120     | 0.370 | 0.460 |       |                       | 2.149     | 0.370 | 0.498 |       |        |
| Fe3–S2                | 2.277        | 2.120     | 0.370 | 0.654 |       |                       | 2.149     | 0.370 | 0.708 |       |        |
| Fe3–S4                | 2.298        | 2.120     | 0.370 | 0.618 | 2.201 | 0.201                 | 2.149     | 0.370 | 0.669 | 2.404 | -0.596 |
| Fe4–S1                | 2.385        | 2.120     | 0.370 | 0.489 |       |                       | 2.149     | 0.370 | 0.528 |       |        |
| Fe4–S3                | 2.262        | 2.120     | 0.370 | 0.681 |       |                       | 2.149     | 0.370 | 0.737 |       |        |
| Fe4–S4                | 2.273        | 2.120     | 0.370 | 0.661 |       |                       | 2.149     | 0.370 | 0.715 |       |        |

|        |       |       |       |       |        |       |       |       |       |        |        |
|--------|-------|-------|-------|-------|--------|-------|-------|-------|-------|--------|--------|
| Fe4-S8 | 2.292 | 2.120 | 0.370 | 0.628 | 2.459  | 0.459 | 2.149 | 0.370 | 0.679 | 2.660  | -0.340 |
| Fe5-N4 | 1.927 | 1.769 | 0.370 | 0.652 |        |       | 1.815 | 0.370 | 0.739 |        |        |
| Fe5-S5 | 2.273 | 2.120 | 0.370 | 0.661 |        |       | 2.149 | 0.370 | 0.715 |        |        |
| Fe5-S6 | 2.302 | 2.120 | 0.370 | 0.611 |        |       | 2.149 | 0.370 | 0.661 |        |        |
| Fe5-S7 | 2.309 | 2.120 | 0.370 | 0.600 | 2.525  | 0.525 | 2.149 | 0.370 | 0.649 | 2.764  | -0.236 |
| Fe6-N3 | 2.075 | 1.769 | 0.370 | 0.437 |        |       | 1.815 | 0.370 | 0.495 |        |        |
| Fe6-S1 | 2.373 | 2.120 | 0.370 | 0.505 |        |       | 2.149 | 0.370 | 0.546 |        |        |
| Fe6-S5 | 2.287 | 2.120 | 0.370 | 0.637 |        |       | 2.149 | 0.370 | 0.689 |        |        |
| Fe6-S6 | 2.280 | 2.120 | 0.370 | 0.649 | 2.228  | 0.228 | 2.149 | 0.370 | 0.702 | 2.432  | -0.568 |
| Fe7-N2 | 2.076 | 1.769 | 0.370 | 0.436 |        |       | 1.815 | 0.370 | 0.494 |        |        |
| Fe7-S1 | 2.394 | 2.120 | 0.370 | 0.477 |        |       | 2.149 | 0.370 | 0.516 |        |        |
| Fe7-S5 | 2.288 | 2.120 | 0.370 | 0.635 |        |       | 2.149 | 0.370 | 0.687 |        |        |
| Fe7-S7 | 2.287 | 2.120 | 0.370 | 0.637 | 2.185  | 0.185 | 2.149 | 0.370 | 0.689 | 2.385  | -0.615 |
| Fe8-S1 | 2.403 | 2.120 | 0.370 | 0.465 |        |       | 2.149 | 0.370 | 0.503 |        |        |
| Fe8-S6 | 2.287 | 2.120 | 0.370 | 0.637 |        |       | 2.149 | 0.370 | 0.689 |        |        |
| Fe8-S7 | 2.285 | 2.120 | 0.370 | 0.640 |        |       | 2.149 | 0.370 | 0.692 |        |        |
| Fe8-S9 | 2.306 | 2.120 | 0.370 | 0.605 | 2.347  | 0.347 | 2.149 | 0.370 | 0.654 | 2.539  | -0.461 |
|        |       |       |       |       | 18.804 |       |       |       |       | 20.499 |        |

**Table S110** The bond valence analyses of irons in P<sup>N</sup> model compounds MUFQUA.

| Bond                  | $r_{ij}$ (Å) | $R_0$ (Å) | B (Å) | Bval  | Sum   | Diff.                 | $R_0$ (Å) | B (Å) | Bval  | Sum   | Diff.  |
|-----------------------|--------------|-----------|-------|-------|-------|-----------------------|-----------|-------|-------|-------|--------|
| expected valence = +2 |              |           |       |       |       | expected valence = +3 |           |       |       |       |        |
| Fe1-S2                | 2.238        | 2.120     | 0.370 | 0.727 |       |                       | 2.149     | 0.370 | 0.786 |       |        |
| Fe1-S3                | 2.272        | 2.120     | 0.370 | 0.663 |       |                       | 2.149     | 0.370 | 0.717 |       |        |
| Fe1-S4                | 2.271        | 2.120     | 0.370 | 0.665 |       |                       | 2.149     | 0.370 | 0.719 |       |        |
| Fe1-S10               | 2.229        | 2.120     | 0.370 | 0.745 | 2.800 | 0.800                 | 2.149     | 0.370 | 0.806 | 3.028 | 0.028  |
| Fe2-N1                | 2.060        | 1.769     | 0.370 | 0.455 |       |                       | 1.815     | 0.370 | 0.516 |       |        |
| Fe2-S1                | 2.398        | 2.120     | 0.370 | 0.472 |       |                       | 2.149     | 0.370 | 0.510 |       |        |
| Fe2-S2                | 2.285        | 2.120     | 0.370 | 0.640 |       |                       | 2.149     | 0.370 | 0.692 |       |        |
| Fe2-S3                | 2.292        | 2.120     | 0.370 | 0.628 | 2.196 | 0.196                 | 2.149     | 0.370 | 0.679 | 2.398 | -0.602 |
| Fe3-N2                | 2.048        | 1.769     | 0.370 | 0.470 |       |                       | 1.815     | 0.370 | 0.533 |       |        |
| Fe3-S1                | 2.415        | 2.120     | 0.370 | 0.451 |       |                       | 2.149     | 0.370 | 0.487 |       |        |
| Fe3-S2                | 2.294        | 2.120     | 0.370 | 0.625 |       |                       | 2.149     | 0.370 | 0.676 |       |        |
| Fe3-S4                | 2.283        | 2.120     | 0.370 | 0.644 | 2.190 | 0.190                 | 2.149     | 0.370 | 0.696 | 2.392 | -0.608 |
| Fe4-S1                | 2.351        | 2.120     | 0.370 | 0.536 |       |                       | 2.149     | 0.370 | 0.579 |       |        |
| Fe4-S3                | 2.272        | 2.120     | 0.370 | 0.663 |       |                       | 2.149     | 0.370 | 0.717 |       |        |
| Fe4-S4                | 2.262        | 2.120     | 0.370 | 0.681 |       |                       | 2.149     | 0.370 | 0.737 |       |        |

|         |       |       |       |       |        |       |       |       |       |        |        |
|---------|-------|-------|-------|-------|--------|-------|-------|-------|-------|--------|--------|
| Fe4-S8  | 2.334 | 2.120 | 0.370 | 0.561 | 2.441  | 0.441 | 2.149 | 0.370 | 0.607 | 2.640  | -0.360 |
| Fe5-S5  | 2.245 | 2.120 | 0.370 | 0.713 |        |       | 2.149 | 0.370 | 0.771 |        |        |
| Fe5-S6  | 2.272 | 2.120 | 0.370 | 0.663 |        |       | 2.149 | 0.370 | 0.717 |        |        |
| Fe5-S7  | 2.281 | 2.120 | 0.370 | 0.647 |        |       | 2.149 | 0.370 | 0.700 |        |        |
| Fe5-S11 | 2.245 | 2.120 | 0.370 | 0.713 | 2.737  | 0.737 | 2.149 | 0.370 | 0.771 | 2.960  | -0.040 |
| Fe6-N2  | 2.044 | 1.769 | 0.370 | 0.476 |        |       | 1.815 | 0.370 | 0.539 |        |        |
| Fe6-S1  | 2.368 | 2.120 | 0.370 | 0.512 |        |       | 2.149 | 0.370 | 0.553 |        |        |
| Fe6-S5  | 2.283 | 2.120 | 0.370 | 0.644 |        |       | 2.149 | 0.370 | 0.696 |        |        |
| Fe6-S6  | 2.280 | 2.120 | 0.370 | 0.649 | 2.280  | 0.280 | 2.149 | 0.370 | 0.702 | 2.490  | -0.510 |
| Fe7-N1  | 2.044 | 1.769 | 0.370 | 0.476 |        |       | 1.815 | 0.370 | 0.539 |        |        |
| Fe7-S1  | 2.384 | 2.120 | 0.370 | 0.490 |        |       | 2.149 | 0.370 | 0.530 |        |        |
| Fe7-S5  | 2.292 | 2.120 | 0.370 | 0.628 |        |       | 2.149 | 0.370 | 0.679 |        |        |
| Fe7-S7  | 2.284 | 2.120 | 0.370 | 0.642 | 2.236  | 0.236 | 2.149 | 0.370 | 0.694 | 2.442  | -0.558 |
| Fe8-S1  | 2.397 | 2.120 | 0.370 | 0.473 |        |       | 2.149 | 0.370 | 0.512 |        |        |
| Fe8-S6  | 2.258 | 2.120 | 0.370 | 0.689 |        |       | 2.149 | 0.370 | 0.745 |        |        |
| Fe8-S7  | 2.273 | 2.120 | 0.370 | 0.661 |        |       | 2.149 | 0.370 | 0.715 |        |        |
| Fe8-S9  | 2.307 | 2.120 | 0.370 | 0.603 | 2.426  | 0.426 | 2.149 | 0.370 | 0.652 | 2.624  | -0.376 |
|         |       |       |       |       | 19.304 |       |       |       |       | 20.974 |        |

**Table S111** The bond valence analyses of irons in P<sup>N</sup> model compounds MUFRAH.

| Bond                  | $r_{ij}$ (Å) | $R_0$ (Å) | B (Å) | Bval  | Sum   | Diff.                 | $R_0$ (Å) | B (Å) | Bval  | Sum   | Diff.  |
|-----------------------|--------------|-----------|-------|-------|-------|-----------------------|-----------|-------|-------|-------|--------|
| expected valence = +2 |              |           |       |       |       | expected valence = +3 |           |       |       |       |        |
| Fe1-S10               | 2.252        | 2.120     | 0.370 | 0.700 |       |                       | 2.149     | 0.370 | 0.757 |       |        |
| Fe1-S2                | 2.223        | 2.120     | 0.370 | 0.757 |       |                       | 2.149     | 0.370 | 0.819 |       |        |
| Fe1-S3                | 2.281        | 2.120     | 0.370 | 0.647 |       |                       | 2.149     | 0.370 | 0.700 |       |        |
| Fe1-S4                | 2.277        | 2.120     | 0.370 | 0.654 | 2.758 | 0.758                 | 2.149     | 0.370 | 0.708 | 2.983 | -0.017 |
| Fe2-N1                | 2.059        | 1.769     | 0.370 | 0.457 |       |                       | 1.815     | 0.370 | 0.517 |       |        |
| Fe2-S1                | 2.406        | 2.120     | 0.370 | 0.462 |       |                       | 2.149     | 0.370 | 0.499 |       |        |
| Fe2-S2                | 2.285        | 2.120     | 0.370 | 0.640 |       |                       | 2.149     | 0.370 | 0.692 |       |        |
| Fe2-S3                | 2.281        | 2.120     | 0.370 | 0.647 | 2.206 | 0.206                 | 2.149     | 0.370 | 0.700 | 2.409 | -0.591 |
| Fe3-N2                | 2.062        | 1.769     | 0.370 | 0.453 |       |                       | 1.815     | 0.370 | 0.513 |       |        |
| Fe3-S1                | 2.411        | 2.120     | 0.370 | 0.455 |       |                       | 2.149     | 0.370 | 0.493 |       |        |
| Fe3-S2                | 2.283        | 2.120     | 0.370 | 0.644 |       |                       | 2.149     | 0.370 | 0.696 |       |        |
| Fe3-S4                | 2.282        | 2.120     | 0.370 | 0.645 | 2.198 | 0.198                 | 2.149     | 0.370 | 0.698 | 2.400 | -0.600 |
| Fe4-S1                | 2.430        | 2.120     | 0.370 | 0.433 |       |                       | 2.149     | 0.370 | 0.468 |       |        |
| Fe4-S3                | 2.299        | 2.120     | 0.370 | 0.616 |       |                       | 2.149     | 0.370 | 0.667 |       |        |
| Fe4-S4                | 2.295        | 2.120     | 0.370 | 0.623 |       |                       | 2.149     | 0.370 | 0.674 |       |        |

|         |       |       |       |       |        |       |       |       |       |        |        |
|---------|-------|-------|-------|-------|--------|-------|-------|-------|-------|--------|--------|
| Fe4-S8  | 2.312 | 2.120 | 0.370 | 0.595 | 2.267  | 0.267 | 2.149 | 0.370 | 0.644 | 2.452  | -0.548 |
| Fe5-S11 | 2.254 | 2.120 | 0.370 | 0.696 |        |       | 2.149 | 0.370 | 0.753 |        |        |
| Fe5-S5  | 2.258 | 2.120 | 0.370 | 0.689 |        |       | 2.149 | 0.370 | 0.745 |        |        |
| Fe5-S6  | 2.275 | 2.120 | 0.370 | 0.658 |        |       | 2.149 | 0.370 | 0.711 |        |        |
| Fe5-S7  | 2.269 | 2.120 | 0.370 | 0.669 | 2.711  | 0.711 | 2.149 | 0.370 | 0.723 | 2.932  | -0.068 |
| Fe6-N2  | 2.054 | 1.769 | 0.370 | 0.463 |        |       | 1.815 | 0.370 | 0.524 |        |        |
| Fe6-S1  | 2.398 | 2.120 | 0.370 | 0.472 |        |       | 2.149 | 0.370 | 0.510 |        |        |
| Fe6-S5  | 2.295 | 2.120 | 0.370 | 0.623 |        |       | 2.149 | 0.370 | 0.674 |        |        |
| Fe6-S6  | 2.269 | 2.120 | 0.370 | 0.669 | 2.226  | 0.226 | 2.149 | 0.370 | 0.723 | 2.431  | -0.569 |
| Fe7-N1  | 2.047 | 1.769 | 0.370 | 0.472 |        |       | 1.815 | 0.370 | 0.534 |        |        |
| Fe7-S1  | 2.405 | 2.120 | 0.370 | 0.463 |        |       | 2.149 | 0.370 | 0.501 |        |        |
| Fe7-S5  | 2.286 | 2.120 | 0.370 | 0.638 |        |       | 2.149 | 0.370 | 0.691 |        |        |
| Fe7-S7  | 2.272 | 2.120 | 0.370 | 0.663 | 2.236  | 0.236 | 2.149 | 0.370 | 0.717 | 2.443  | -0.557 |
| Fe8-S1  | 2.384 | 2.120 | 0.370 | 0.490 |        |       | 2.149 | 0.370 | 0.530 |        |        |
| Fe8-S6  | 2.274 | 2.120 | 0.370 | 0.660 |        |       | 2.149 | 0.370 | 0.713 |        |        |
| Fe8-S7  | 2.287 | 2.120 | 0.370 | 0.637 |        |       | 2.149 | 0.370 | 0.689 |        |        |
| Fe8-S9  | 2.325 | 2.120 | 0.370 | 0.575 | 2.361  | 0.361 | 2.149 | 0.370 | 0.621 | 2.553  | -0.447 |
|         |       |       |       |       | 18.963 |       |       |       |       | 20.603 |        |

**Table S112** The bond valence analyses of irons in P<sup>N</sup> model compounds MUFREL.

| Bond                  | $r_{ij}$ (Å) | $R_0$ (Å) | B (Å) | Bval  | Sum   | Diff.                 | $R_0$ (Å) | B (Å) | Bval  | Sum   | Diff.  |
|-----------------------|--------------|-----------|-------|-------|-------|-----------------------|-----------|-------|-------|-------|--------|
| expected valence = +2 |              |           |       |       |       | expected valence = +3 |           |       |       |       |        |
| Fe1-S1                | 2.248        | 2.120     | 0.370 | 0.708 |       |                       | 2.149     | 0.370 | 0.765 |       |        |
| Fe1-S2                | 2.276        | 2.120     | 0.370 | 0.656 |       |                       | 2.149     | 0.370 | 0.709 |       |        |
| Fe1-S3                | 2.273        | 2.120     | 0.370 | 0.661 |       |                       | 2.149     | 0.370 | 0.715 |       |        |
| Fe1-S8                | 2.227        | 2.120     | 0.370 | 0.749 | 2.774 | 0.774                 | 2.149     | 0.370 | 0.810 | 3.000 | 0.000  |
| Fe2-N1                | 2.048        | 1.769     | 0.370 | 0.470 |       |                       | 1.815     | 0.370 | 0.533 |       |        |
| Fe2-S1                | 2.271        | 2.120     | 0.370 | 0.665 |       |                       | 2.149     | 0.370 | 0.719 |       |        |
| Fe2-S2                | 2.288        | 2.120     | 0.370 | 0.635 |       |                       | 2.149     | 0.370 | 0.687 |       |        |
| Fe2-S4                | 2.378        | 2.120     | 0.370 | 0.498 | 2.268 | 0.268                 | 2.149     | 0.370 | 0.539 | 2.477 | -0.523 |
| Fe3-N2                | 2.044        | 1.769     | 0.370 | 0.476 |       |                       | 1.815     | 0.370 | 0.539 |       |        |
| Fe3-S1                | 2.284        | 2.120     | 0.370 | 0.642 |       |                       | 2.149     | 0.370 | 0.694 |       |        |
| Fe3-S3                | 2.295        | 2.120     | 0.370 | 0.623 |       |                       | 2.149     | 0.370 | 0.674 |       |        |
| Fe3-S4                | 2.418        | 2.120     | 0.370 | 0.447 | 2.188 | 0.188                 | 2.149     | 0.370 | 0.483 | 2.390 | -0.610 |
| Fe4-S2                | 2.287        | 2.120     | 0.370 | 0.637 |       |                       | 2.149     | 0.370 | 0.689 |       |        |
| Fe4-S3                | 2.276        | 2.120     | 0.370 | 0.656 |       |                       | 2.149     | 0.370 | 0.709 |       |        |
| Fe4-S4                | 2.406        | 2.120     | 0.370 | 0.462 |       |                       | 2.149     | 0.370 | 0.499 |       |        |



|         |       |       |       |       |        |       |       |       |       |        |        |
|---------|-------|-------|-------|-------|--------|-------|-------|-------|-------|--------|--------|
| Fe4-S10 | 2.321 | 2.120 | 0.370 | 0.581 | 2.335  | 0.335 | 2.149 | 0.370 | 0.628 | 2.526  | -0.474 |
| Fe5-N1  | 2.068 | 1.769 | 0.370 | 0.446 |        |       | 1.815 | 0.370 | 0.505 |        |        |
| Fe5-S5  | 2.279 | 2.120 | 0.370 | 0.651 |        |       | 2.149 | 0.370 | 0.704 |        |        |
| Fe5-S6  | 2.304 | 2.120 | 0.370 | 0.608 |        |       | 2.149 | 0.370 | 0.658 |        |        |
| Fe5-S4  | 2.406 | 2.120 | 0.370 | 0.462 | 2.166  | 0.166 | 2.149 | 0.370 | 0.499 | 2.365  | -0.635 |
| Fe6-N2  | 2.034 | 1.769 | 0.370 | 0.489 |        |       | 1.815 | 0.370 | 0.553 |        |        |
| Fe6-S4  | 2.386 | 2.120 | 0.370 | 0.487 |        |       | 2.149 | 0.370 | 0.527 |        |        |
| Fe6-S5  | 2.268 | 2.120 | 0.370 | 0.670 |        |       | 2.149 | 0.370 | 0.725 |        |        |
| Fe6-S7  | 2.283 | 2.120 | 0.370 | 0.644 | 2.290  | 0.290 | 2.149 | 0.370 | 0.696 | 2.501  | -0.499 |
| Fe7-S6  | 2.283 | 2.120 | 0.370 | 0.644 |        |       | 2.149 | 0.370 | 0.696 |        |        |
| Fe7-S11 | 2.314 | 2.120 | 0.370 | 0.592 |        |       | 2.149 | 0.370 | 0.640 |        |        |
| Fe7-S4  | 2.406 | 2.120 | 0.370 | 0.462 |        |       | 2.149 | 0.370 | 0.499 |        |        |
| Fe7-S7  | 2.278 | 2.120 | 0.370 | 0.652 | 2.350  | 0.350 | 2.149 | 0.370 | 0.706 | 2.541  | -0.459 |
| Fe8-S5  | 2.243 | 2.120 | 0.370 | 0.717 |        |       | 2.149 | 0.370 | 0.776 |        |        |
| Fe8-S6  | 2.280 | 2.120 | 0.370 | 0.649 |        |       | 2.149 | 0.370 | 0.702 |        |        |
| Fe8-S7  | 2.271 | 2.120 | 0.370 | 0.665 |        |       | 2.149 | 0.370 | 0.719 |        |        |
| Fe8-S9  | 2.228 | 2.120 | 0.370 | 0.747 | 2.778  | 0.778 | 2.149 | 0.370 | 0.808 | 3.004  | 0.004  |
|         |       |       |       |       | 19.149 |       |       |       |       | 20.805 |        |

**Table S113** The bond valence analyses of irons in P<sup>N</sup> model compounds NIFWOQ.

| Bond                  | $r_{ij}$ (Å) | $R_0$ (Å) | B (Å) | Bval  | Sum   | Diff.                 | $R_0$ (Å) | B (Å) | Bval  | Sum   | Diff.  |
|-----------------------|--------------|-----------|-------|-------|-------|-----------------------|-----------|-------|-------|-------|--------|
| expected valence = +2 |              |           |       |       |       | expected valence = +3 |           |       |       |       |        |
| Fe1–N1                | 1.913        | 1.769     | 0.370 | 0.678 |       |                       | 1.815     | 0.370 | 0.767 |       |        |
| Fe1–S2                | 2.268        | 2.120     | 0.370 | 0.670 |       |                       | 2.149     | 0.370 | 0.725 |       |        |
| Fe1–S3                | 2.277        | 2.120     | 0.370 | 0.654 |       |                       | 2.149     | 0.370 | 0.708 |       |        |
| Fe1–S4                | 2.278        | 2.120     | 0.370 | 0.652 | 2.655 | 0.655                 | 2.149     | 0.370 | 0.706 | 2.905 | -0.095 |
| Fe2–N2                | 2.002        | 1.769     | 0.370 | 0.533 |       |                       | 1.815     | 0.370 | 0.603 |       |        |
| Fe2–S1                | 2.398        | 2.120     | 0.370 | 0.472 |       |                       | 2.149     | 0.370 | 0.510 |       |        |
| Fe2–S2                | 2.258        | 2.120     | 0.370 | 0.689 |       |                       | 2.149     | 0.370 | 0.745 |       |        |
| Fe2–S3                | 2.288        | 2.120     | 0.370 | 0.635 | 2.328 | 0.328                 | 2.149     | 0.370 | 0.687 | 2.545 | -0.455 |
| Fe3–N2A               | 2.071        | 1.769     | 0.370 | 0.442 |       |                       | 1.815     | 0.370 | 0.501 |       |        |
| Fe3–S1                | 2.396        | 2.120     | 0.370 | 0.474 |       |                       | 2.149     | 0.370 | 0.513 |       |        |
| Fe3–S2                | 2.249        | 2.120     | 0.370 | 0.706 |       |                       | 2.149     | 0.370 | 0.763 |       |        |
| Fe3–S4                | 2.282        | 2.120     | 0.370 | 0.645 | 2.267 | 0.267                 | 2.149     | 0.370 | 0.698 | 2.475 | -0.525 |
| Fe4–S1                | 2.363        | 2.120     | 0.370 | 0.519 |       |                       | 2.149     | 0.370 | 0.561 |       |        |
| Fe4–S3                | 2.246        | 2.120     | 0.370 | 0.711 |       |                       | 2.149     | 0.370 | 0.769 |       |        |
| Fe4–S4                | 2.270        | 2.120     | 0.370 | 0.667 |       |                       | 2.149     | 0.370 | 0.721 |       |        |

|          |       |       |       |       |        |       |       |       |       |        |        |
|----------|-------|-------|-------|-------|--------|-------|-------|-------|-------|--------|--------|
| Fe4-S5/6 | 2.439 | 2.120 | 0.370 | 0.422 | 2.319  | 0.319 | 2.149 | 0.370 | 0.457 | 2.508  | -0.492 |
| Fe1A-N1A | 1.938 | 1.769 | 0.370 | 0.633 |        |       | 1.815 | 0.370 | 0.717 |        |        |
| Fe1A-S2A | 2.268 | 2.120 | 0.370 | 0.670 |        |       | 2.149 | 0.370 | 0.725 |        |        |
| Fe1A-S3A | 2.277 | 2.120 | 0.370 | 0.654 |        |       | 2.149 | 0.370 | 0.708 |        |        |
| Fe1A-S4A | 2.278 | 2.120 | 0.370 | 0.652 | 2.610  | 0.610 | 2.149 | 0.370 | 0.706 | 2.855  | -0.145 |
| Fe2A-N2A | 2.164 | 1.769 | 0.370 | 0.344 |        |       | 1.815 | 0.370 | 0.389 |        |        |
| Fe2A-S1  | 2.398 | 2.120 | 0.370 | 0.472 |        |       | 2.149 | 0.370 | 0.510 |        |        |
| Fe2A-S2A | 2.258 | 2.120 | 0.370 | 0.689 |        |       | 2.149 | 0.370 | 0.745 |        |        |
| Fe2A-S3A | 2.288 | 2.120 | 0.370 | 0.635 | 2.139  | 0.139 | 2.149 | 0.370 | 0.687 | 2.331  | -0.669 |
| Fe3A-N2  | 2.062 | 1.769 | 0.370 | 0.453 |        |       | 1.815 | 0.370 | 0.513 |        |        |
| Fe3A-S1  | 2.396 | 2.120 | 0.370 | 0.474 |        |       | 2.149 | 0.370 | 0.513 |        |        |
| Fe3A-S2A | 2.249 | 2.120 | 0.370 | 0.706 |        |       | 2.149 | 0.370 | 0.763 |        |        |
| Fe3A-S4A | 2.282 | 2.120 | 0.370 | 0.645 | 2.278  | 0.278 | 2.149 | 0.370 | 0.698 | 2.487  | -0.513 |
| Fe4A-S1  | 2.363 | 2.120 | 0.370 | 0.519 |        |       | 2.149 | 0.370 | 0.561 |        |        |
| Fe4A-S3A | 2.246 | 2.120 | 0.370 | 0.711 |        |       | 2.149 | 0.370 | 0.769 |        |        |
| Fe4A-S4A | 2.270 | 2.120 | 0.370 | 0.667 |        |       | 2.149 | 0.370 | 0.721 |        |        |
| Fe4A-S5A | 2.413 | 2.120 | 0.370 | 0.453 | 2.350  | 0.350 | 2.149 | 0.370 | 0.490 | 2.541  | -0.459 |
|          |       |       |       |       | 18.947 |       |       |       |       | 20.648 |        |

**Table S114** The bond valence analyses of irons in P<sup>N</sup> model compounds NIFWUW.

| Bond                  | $r_{ij}$ (Å) | $R_0$ (Å) | B (Å) | Bval  | Sum   | Diff.                 | $R_0$ (Å) | B (Å) | Bval  | Sum   | Diff.  |
|-----------------------|--------------|-----------|-------|-------|-------|-----------------------|-----------|-------|-------|-------|--------|
| expected valence = +2 |              |           |       |       |       | expected valence = +3 |           |       |       |       |        |
| Fe1–N1                | 1.919        | 1.769     | 0.370 | 0.667 |       |                       | 1.815     | 0.370 | 0.755 |       |        |
| Fe1–S2                | 2.274        | 2.120     | 0.370 | 0.660 |       |                       | 2.149     | 0.370 | 0.713 |       |        |
| Fe1–S3                | 2.296        | 2.120     | 0.370 | 0.621 |       |                       | 2.149     | 0.370 | 0.672 |       |        |
| Fe1–S4                | 2.300        | 2.120     | 0.370 | 0.615 | 2.562 | 0.562                 | 2.149     | 0.370 | 0.665 | 2.805 | -0.195 |
| Fe2–N2                | 2.071        | 1.769     | 0.370 | 0.442 |       |                       | 1.815     | 0.370 | 0.501 |       |        |
| Fe2–S1                | 2.404        | 2.120     | 0.370 | 0.464 |       |                       | 2.149     | 0.370 | 0.502 |       |        |
| Fe2–S2                | 2.284        | 2.120     | 0.370 | 0.642 |       |                       | 2.149     | 0.370 | 0.694 |       |        |
| Fe2–S3                | 2.283        | 2.120     | 0.370 | 0.644 | 2.192 | 0.192                 | 2.149     | 0.370 | 0.696 | 2.393 | -0.607 |
| Fe3–N4                | 2.130        | 1.769     | 0.370 | 0.377 |       |                       | 1.815     | 0.370 | 0.427 |       |        |
| Fe3–S1                | 2.410        | 2.120     | 0.370 | 0.457 |       |                       | 2.149     | 0.370 | 0.494 |       |        |
| Fe3–S2                | 2.278        | 2.120     | 0.370 | 0.652 |       |                       | 2.149     | 0.370 | 0.706 |       |        |
| Fe3–S4                | 2.290        | 2.120     | 0.370 | 0.632 | 2.118 | 0.118                 | 2.149     | 0.370 | 0.683 | 2.310 | -0.690 |
| Fe4–S1                | 2.360        | 2.120     | 0.370 | 0.523 |       |                       | 2.149     | 0.370 | 0.565 |       |        |
| Fe4–S3                | 2.276        | 2.120     | 0.370 | 0.656 |       |                       | 2.149     | 0.370 | 0.709 |       |        |
| Fe4–S4                | 2.269        | 2.120     | 0.370 | 0.669 |       |                       | 2.149     | 0.370 | 0.723 |       |        |

|        |       |       |       |       |        |       |       |       |       |        |        |
|--------|-------|-------|-------|-------|--------|-------|-------|-------|-------|--------|--------|
| Fe4-S8 | 2.344 | 2.120 | 0.370 | 0.546 | 2.393  | 0.393 | 2.149 | 0.370 | 0.590 | 2.588  | -0.412 |
| Fe5-N3 | 1.926 | 1.769 | 0.370 | 0.654 |        |       | 1.815 | 0.370 | 0.741 |        |        |
| Fe5-S5 | 2.287 | 2.120 | 0.370 | 0.637 |        |       | 2.149 | 0.370 | 0.689 |        |        |
| Fe5-S6 | 2.295 | 2.120 | 0.370 | 0.623 |        |       | 2.149 | 0.370 | 0.674 |        |        |
| Fe5-S7 | 2.309 | 2.120 | 0.370 | 0.600 | 2.514  | 0.514 | 2.149 | 0.370 | 0.649 | 2.752  | -0.248 |
| Fe6-N4 | 2.008 | 1.769 | 0.370 | 0.524 |        |       | 1.815 | 0.370 | 0.594 |        |        |
| Fe6-S1 | 2.388 | 2.120 | 0.370 | 0.485 |        |       | 2.149 | 0.370 | 0.524 |        |        |
| Fe6-S5 | 2.276 | 2.120 | 0.370 | 0.656 |        |       | 2.149 | 0.370 | 0.709 |        |        |
| Fe6-S6 | 2.295 | 2.120 | 0.370 | 0.623 | 2.288  | 0.288 | 2.149 | 0.370 | 0.674 | 2.501  | -0.499 |
| Fe7-N2 | 2.046 | 1.769 | 0.370 | 0.473 |        |       | 1.815 | 0.370 | 0.536 |        |        |
| Fe7-S1 | 2.390 | 2.120 | 0.370 | 0.482 |        |       | 2.149 | 0.370 | 0.521 |        |        |
| Fe7-S5 | 2.284 | 2.120 | 0.370 | 0.642 |        |       | 2.149 | 0.370 | 0.694 |        |        |
| Fe7-S7 | 2.295 | 2.120 | 0.370 | 0.623 | 2.220  | 0.220 | 2.149 | 0.370 | 0.674 | 2.425  | -0.575 |
| Fe8-S1 | 2.355 | 2.120 | 0.370 | 0.530 |        |       | 2.149 | 0.370 | 0.573 |        |        |
| Fe8-S6 | 2.280 | 2.120 | 0.370 | 0.649 |        |       | 2.149 | 0.370 | 0.702 |        |        |
| Fe8-S7 | 2.251 | 2.120 | 0.370 | 0.702 |        |       | 2.149 | 0.370 | 0.759 |        |        |
| Fe8-S9 | 2.338 | 2.120 | 0.370 | 0.555 | 2.435  | 0.435 | 2.149 | 0.370 | 0.600 | 2.634  | -0.366 |
|        |       |       |       |       | 18.723 |       |       |       |       | 20.409 |        |

**Table S115** The bond valence analyses of irons in P<sup>N</sup> model compounds NIFXAD.

| Bond                  | $r_{ij}$ (Å) | $R_0$ (Å) | B (Å) | Bval  | Sum   | Diff.                 | $R_0$ (Å) | B (Å) | Bval  | Sum   | Diff.  |
|-----------------------|--------------|-----------|-------|-------|-------|-----------------------|-----------|-------|-------|-------|--------|
| expected valence = +2 |              |           |       |       |       | expected valence = +3 |           |       |       |       |        |
| Fe1–N1                | 1.915        | 1.769     | 0.370 | 0.674 |       |                       | 1.815     | 0.370 | 0.763 |       |        |
| Fe1–S2                | 2.275        | 2.120     | 0.370 | 0.658 |       |                       | 2.149     | 0.370 | 0.711 |       |        |
| Fe1–S3                | 2.304        | 2.120     | 0.370 | 0.608 |       |                       | 2.149     | 0.370 | 0.658 |       |        |
| Fe1–S4                | 2.277        | 2.120     | 0.370 | 0.654 | 2.594 | 0.594                 | 2.149     | 0.370 | 0.708 | 2.840 | -0.160 |
| Fe2–N2                | 2.058        | 1.769     | 0.370 | 0.458 |       |                       | 1.815     | 0.370 | 0.519 |       |        |
| Fe2–S1                | 2.387        | 2.120     | 0.370 | 0.486 |       |                       | 2.149     | 0.370 | 0.526 |       |        |
| Fe2–S2                | 2.276        | 2.120     | 0.370 | 0.656 |       |                       | 2.149     | 0.370 | 0.709 |       |        |
| Fe2–S3                | 2.291        | 2.120     | 0.370 | 0.630 | 2.230 | 0.230                 | 2.149     | 0.370 | 0.681 | 2.435 | -0.565 |
| Fe3–N2A               | 2.055        | 1.769     | 0.370 | 0.462 |       |                       | 1.815     | 0.370 | 0.523 |       |        |
| Fe3–S1                | 2.401        | 2.120     | 0.370 | 0.468 |       |                       | 2.149     | 0.370 | 0.506 |       |        |
| Fe3–S2                | 2.289        | 2.120     | 0.370 | 0.633 |       |                       | 2.149     | 0.370 | 0.685 |       |        |
| Fe3–S4                | 2.289        | 2.120     | 0.370 | 0.633 | 2.196 | 0.196                 | 2.149     | 0.370 | 0.685 | 2.399 | -0.601 |
| Fe4–S1                | 2.351        | 2.120     | 0.370 | 0.536 |       |                       | 2.149     | 0.370 | 0.579 |       |        |
| Fe4–S3                | 2.278        | 2.120     | 0.370 | 0.652 |       |                       | 2.149     | 0.370 | 0.706 |       |        |
| Fe4–S4                | 2.258        | 2.120     | 0.370 | 0.689 |       |                       | 2.149     | 0.370 | 0.745 |       |        |

|          |       |       |       |       |        |       |       |       |       |        |        |
|----------|-------|-------|-------|-------|--------|-------|-------|-------|-------|--------|--------|
| Fe4-S5   | 2.344 | 2.120 | 0.370 | 0.546 | 2.423  | 0.423 | 2.149 | 0.370 | 0.590 | 2.620  | -0.380 |
| Fe1A-N1A | 1.915 | 1.769 | 0.370 | 0.674 |        |       | 1.815 | 0.370 | 0.763 |        |        |
| Fe1A-S2A | 2.275 | 2.120 | 0.370 | 0.658 |        |       | 2.149 | 0.370 | 0.711 |        |        |
| Fe1A-S3A | 2.304 | 2.120 | 0.370 | 0.608 |        |       | 2.149 | 0.370 | 0.658 |        |        |
| Fe1A-S4A | 2.277 | 2.120 | 0.370 | 0.654 | 2.594  | 0.594 | 2.149 | 0.370 | 0.708 | 2.840  | -0.160 |
| Fe2A-N2A | 2.058 | 1.769 | 0.370 | 0.458 |        |       | 1.815 | 0.370 | 0.519 |        |        |
| Fe2A-S1  | 2.387 | 2.120 | 0.370 | 0.486 |        |       | 2.149 | 0.370 | 0.526 |        |        |
| Fe2A-S2A | 2.276 | 2.120 | 0.370 | 0.656 |        |       | 2.149 | 0.370 | 0.709 |        |        |
| Fe2A-S3A | 2.291 | 2.120 | 0.370 | 0.630 | 2.230  | 0.230 | 2.149 | 0.370 | 0.681 | 2.435  | -0.565 |
| Fe3A-N2  | 2.055 | 1.769 | 0.370 | 0.462 |        |       | 1.815 | 0.370 | 0.523 |        |        |
| Fe3A-S1  | 2.401 | 2.120 | 0.370 | 0.468 |        |       | 2.149 | 0.370 | 0.506 |        |        |
| Fe3A-S2A | 2.289 | 2.120 | 0.370 | 0.633 |        |       | 2.149 | 0.370 | 0.685 |        |        |
| Fe3A-S4A | 2.289 | 2.120 | 0.370 | 0.633 | 2.196  | 0.196 | 2.149 | 0.370 | 0.685 | 2.399  | -0.601 |
| Fe4A-S1  | 2.351 | 2.120 | 0.370 | 0.536 |        |       | 2.149 | 0.370 | 0.579 |        |        |
| Fe4A-S3A | 2.278 | 2.120 | 0.370 | 0.652 |        |       | 2.149 | 0.370 | 0.706 |        |        |
| Fe4A-S4A | 2.258 | 2.120 | 0.370 | 0.689 |        |       | 2.149 | 0.370 | 0.745 |        |        |
| Fe4A-S5A | 2.344 | 2.120 | 0.370 | 0.546 | 2.423  | 0.423 | 2.149 | 0.370 | 0.590 | 2.620  | -0.380 |
|          |       |       |       |       | 18.885 |       |       |       |       | 20.587 |        |

**Table S116** The bond valence analyses of irons in P<sup>N</sup> model compounds WUZDAW.

| Bond                  | $r_{ij}$ (Å) | $R_0$ (Å) | B (Å) | Bval  | Sum   | Diff.                 | $R_0$ (Å) | B (Å) | Bval  | Sum   | Diff.  |
|-----------------------|--------------|-----------|-------|-------|-------|-----------------------|-----------|-------|-------|-------|--------|
| expected valence = +2 |              |           |       |       |       | expected valence = +3 |           |       |       |       |        |
| Fe1–N1                | 1.919        | 1.769     | 0.370 | 0.667 |       |                       | 1.815     | 0.370 | 0.755 |       |        |
| Fe1–S2                | 2.284        | 2.120     | 0.370 | 0.642 |       |                       | 2.149     | 0.370 | 0.694 |       |        |
| Fe1–S3                | 2.284        | 2.120     | 0.370 | 0.642 |       |                       | 2.149     | 0.370 | 0.694 |       |        |
| Fe1–S4                | 2.289        | 2.120     | 0.370 | 0.633 | 2.584 | 0.584                 | 2.149     | 0.370 | 0.685 | 2.829 | -0.171 |
| Fe2–N2                | 2.058        | 1.769     | 0.370 | 0.458 |       |                       | 1.815     | 0.370 | 0.519 |       |        |
| Fe2–S1                | 2.372        | 2.120     | 0.370 | 0.506 |       |                       | 2.149     | 0.370 | 0.547 |       |        |
| Fe2–S2                | 2.287        | 2.120     | 0.370 | 0.637 |       |                       | 2.149     | 0.370 | 0.689 |       |        |
| Fe2–S3                | 2.286        | 2.120     | 0.370 | 0.638 | 2.239 | 0.239                 | 2.149     | 0.370 | 0.691 | 2.445 | -0.555 |
| Fe3–N2C               | 2.060        | 1.769     | 0.370 | 0.455 |       |                       | 1.815     | 0.370 | 0.516 |       |        |
| Fe3–S1                | 2.397        | 2.120     | 0.370 | 0.473 |       |                       | 2.149     | 0.370 | 0.512 |       |        |
| Fe3–S2                | 2.296        | 2.120     | 0.370 | 0.621 |       |                       | 2.149     | 0.370 | 0.672 |       |        |
| Fe3–S4                | 2.305        | 2.120     | 0.370 | 0.607 | 2.156 | 0.156                 | 2.149     | 0.370 | 0.656 | 2.355 | -0.645 |
| Fe4–S1                | 2.349        | 2.120     | 0.370 | 0.539 |       |                       | 2.149     | 0.370 | 0.582 |       |        |
| Fe4–S3                | 2.277        | 2.120     | 0.370 | 0.654 |       |                       | 2.149     | 0.370 | 0.708 |       |        |
| Fe4–S4                | 2.256        | 2.120     | 0.370 | 0.692 |       |                       | 2.149     | 0.370 | 0.749 |       |        |



|          |       |       |       |       |        |       |       |       |       |        |        |
|----------|-------|-------|-------|-------|--------|-------|-------|-------|-------|--------|--------|
| Fe4-S5   | 2.315 | 2.120 | 0.370 | 0.590 | 2.476  | 0.476 | 2.149 | 0.370 | 0.638 | 2.677  | -0.323 |
| Fe1C-N1C | 1.919 | 1.769 | 0.370 | 0.667 |        |       | 1.815 | 0.370 | 0.755 |        |        |
| Fe1C-S2C | 2.284 | 2.120 | 0.370 | 0.642 |        |       | 2.149 | 0.370 | 0.694 |        |        |
| Fe1C-S3C | 2.284 | 2.120 | 0.370 | 0.642 |        |       | 2.149 | 0.370 | 0.694 |        |        |
| Fe1C-S4C | 2.289 | 2.120 | 0.370 | 0.633 | 2.584  | 0.584 | 2.149 | 0.370 | 0.685 | 2.829  | -0.171 |
| Fe2C-N2C | 2.058 | 1.769 | 0.370 | 0.458 |        |       | 1.815 | 0.370 | 0.519 |        |        |
| Fe2C-S1  | 2.372 | 2.120 | 0.370 | 0.506 |        |       | 2.149 | 0.370 | 0.547 |        |        |
| Fe2C-S2C | 2.287 | 2.120 | 0.370 | 0.637 |        |       | 2.149 | 0.370 | 0.689 |        |        |
| Fe2C-S3C | 2.286 | 2.120 | 0.370 | 0.638 | 2.239  | 0.239 | 2.149 | 0.370 | 0.691 | 2.445  | -0.555 |
| Fe3C-N2  | 2.060 | 1.769 | 0.370 | 0.455 |        |       | 1.815 | 0.370 | 0.516 |        |        |
| Fe3C-S1  | 2.397 | 2.120 | 0.370 | 0.473 |        |       | 2.149 | 0.370 | 0.512 |        |        |
| Fe3C-S2C | 2.296 | 2.120 | 0.370 | 0.621 |        |       | 2.149 | 0.370 | 0.672 |        |        |
| Fe3C-S4C | 2.305 | 2.120 | 0.370 | 0.607 | 2.156  | 0.156 | 2.149 | 0.370 | 0.656 | 2.355  | -0.645 |
| Fe4A-S1  | 2.349 | 2.120 | 0.370 | 0.539 |        |       | 2.149 | 0.370 | 0.582 |        |        |
| Fe4A-S3C | 2.277 | 2.120 | 0.370 | 0.654 |        |       | 2.149 | 0.370 | 0.708 |        |        |
| Fe4A-S4C | 2.256 | 2.120 | 0.370 | 0.692 |        |       | 2.149 | 0.370 | 0.749 |        |        |
| Fe4A-S5C | 2.315 | 2.120 | 0.370 | 0.590 | 2.476  | 0.476 | 2.149 | 0.370 | 0.638 | 2.677  | -0.323 |
|          |       |       |       |       | 18.910 |       |       |       |       | 20.613 |        |

## References

- 1 F. A. Tezcan, J. T. Kaiser, J. B. Howard and D. C. Rees, *J. Am. Chem. Soc.*, 2015, **137**, 146–149.
- 2 J. Kim, D. Woo and D. C. Rees, *Biochemistry*, 1993, **32**, 7104–7115.
- 3 H. Schindelin, C. Kisker, J. L. Schlessman, J. B. Howard and D. C. Rees, *Nature*, 1997, **387**, 370–376.
- 4 R. Sarma, B. M. Barney, S. Keable, D. R. Dean, L. C. Seefeldt and J. W. Peters, *J. Inorg. Biochem.*, 2010, **104**, 385–389.
- 5 H. L. Rutledge, J. Rittle, L. M. Williamson, W. A. Xu, D. M. Gagnon and F. A. Tezcan, *J. Am. Chem. Soc.*, 2019, **141**, 10091–10098.
- 6 B. Schmid, O. Einsle, H. J. Chiu, A. Willing, M. Yoshida, J. B. Howard and D. C. Rees, *Biochemistry*, 2002, **41**, 15557–15565.
- 7 F. Tezcan, J. Kaiser, D. Mustafi, M. Walton, J. Howard and D. Rees, *Science*, 2005, **309**, 1377–1380.
- 8 S. M. Keable, J. Vertemara, O. A. Zadvornyy, B. J. Eilers, K. Danyal, A. J. Rasmussen, L. De Gioia, G. Zampella, L. C. Seefeldt and J. W. Peters, *J. Inorg. Biochem.*, 2018, **180**, 129–134.
- 9 J. T. Henthorn, R. J. Arias, S. Koroidov, T. Kroll, D. Sokaras, U. Bergmann, D. C. Rees and S. DeBeer, *J. Am. Chem. Soc.*, 2019, **141**, 13676–13688.
